# Supplementary material for: Using Bumble Bee Watch to investigate the accuracy and perception of bumble bee (Bombus spp.) identification by community scientists
Source: PeerJ. 2020 Jun 29;8:e9412. doi: 10.7717/peerj.9412 (PMC7331626; doi:10.7717/peerj.9412)
Supplement: Supplemental Information 2 — Data were exported from Bumble Bee Watch on July 19, 2019. [file peerj-08-9412-s002.xlsx]

## Sheet: RawAll20190719
edit made from orig export?	newIDnumber	nest or bee observation	Orig Bee/Nest Id Number	Species	Common name	Provinces/States	Country	Date Observed	Sex	observer Code JUST NUMBER	Status	Determined Date	Determined By CODE NUMBERS	Original Species	Source
	1	nest	1	sp.	Bumble bee	Wisconsin	United States	2013-08-15		37	Pending				Website
	2	nest	4	impatiens	Common eastern bumble bee	Wisconsin	United States	2013-11-30		1094	Pending				Website
	3	nest	5	impatiens	Common eastern bumble bee	Wisconsin	United States	2013-12-16		7213	Pending				Website
	4	nest	6	impatiens	Common eastern bumble bee	Wisconsin	United States	2013-12-16		7213	Verified	2014-05-08	27		Website
	5	nest	7	impatiens	Common eastern bumble bee	Wisconsin	United States	2013-08-28		37	Verified	2014-05-08	27		Website
	6	nest	8	impatiens	Common eastern bumble bee	New York	United States	2013-08-24		3669	Pending				Website
	7	nest	9	impatiens	Common eastern bumble bee	New York	United States	2013-08-24		3669	Verified	2014-05-08	27		Website
	8	nest	10	impatiens	Common eastern bumble bee	Wisconsin	United States	2013-08-23		7814	Verified	2014-05-08	27		Website
	9	nest	11	griseocollis	Brown-belted bumble bee	Minnesota	United States	2013-07-30		7300	Verified	2014-05-08	27		Website
	10	nest	12	melanopygus	Black-tailed bumble bee	Washington	United States	2011-06-26		1930	Verified	2014-05-08	27		Website
	11	nest	13	pensylvanicus	American bumble bee	Texas	United States	2012-09-08		1161	Verified	2014-05-08	27		Website
	12	nest	14	impatiens	Common eastern bumble bee	New York	United States	2008-06-19		3436	Verified	2014-05-08	27		Website
	13	nest	15	melanopygus	Black-tailed bumble bee	California	United States	2013-05-04		2993	Verified	2014-05-08	27		Website
	14	nest	16	sp.	Bumble bee	California	United States	2014-02-23		2993	Verified	2014-05-08	27		Website
	15	nest	17	sp.	Bumble bee	Oregon	United States	2014-03-17		4059	Verified	2014-05-08	27		Website
	16	nest	18	melanopygus	Black-tailed bumble bee	California	United States	2014-03-26		5787	Verified	2014-05-08	27		Website
	17	nest	19	vosnesenskii	Yellow-faced bumble bee	Washington	United States	2014-04-13		1930	Verified	2014-05-08	27		Website
	18	nest	20	impatiens	Common eastern bumble bee	New York	United States	2010-05-02		3436	Verified	2014-06-04	24		Website
	19	nest	21	impatiens	Common eastern bumble bee	North Carolina	United States	2014-04-23		6994	Verified	2014-05-08	27		Website
	20	nest	22	melanopygus	Black-tailed bumble bee	British Columbia	Canada	2014-04-26		3240	Verified	2014-05-08	27		Website
	21	nest	23	bifarius	Two-form bumble bee	British Columbia	Canada	2014-05-02		3402	Verified	2014-05-08	27		Website
	22	nest	24	sp.	Bumble bee	Oregon	United States	2014-05-03		4470	Verified	2014-05-08	27		Website
	23	nest	25	impatiens	Common eastern bumble bee	New York	United States	2014-05-04		3669	Verified	2014-06-04	24		Website
	24	nest	26	melanopygus	Black-tailed bumble bee	Oregon	United States	2014-04-30		6952	Verified	2014-05-08	27		Website
	25	nest	27	melanopygus	Black-tailed bumble bee	California	United States	2012-08-13		1732	Verified	2014-05-28	27		Website
	26	nest	29	bifarius	Two-form bumble bee	British Columbia	Canada	2014-05-13		3402	Verified	2014-05-27	27		Website
	27	nest	30	melanopygus	Black-tailed bumble bee	Washington	United States	2014-05-13		6033	Pending				Website
	28	nest	31	melanopygus	Black-tailed bumble bee	Washington	United States	2014-05-18		7385	Pending				Website
	29	nest	32	sp.	Bumble bee	Washington	United States	2014-05-11		1986	Pending				Website
	30	nest	33	vosnesenskii	Yellow-faced bumble bee	Washington	United States	2014-05-29		1930	Pending				Website
	31	nest	34	melanopygus	Black-tailed bumble bee	Oregon	United States	2014-04-02		6877	Pending				Website
	32	nest	35	melanopygus	Black-tailed bumble bee	Washington	United States	2014-05-29		1930	Pending				Website
	33	nest	36	sp.	Bumble bee	Alberta	Canada	2014-05-31		8414	Pending				Website
	34	nest	37	mixtus	Fuzzy-horned bumble bee	British Columbia	Canada	2014-06-07		3240	Pending				Website
	35	nest	38	griseocollis	Brown-belted bumble bee	Minnesota	United States	2014-06-08		791	Pending				Website
	36	nest	39	melanopygus	Black-tailed bumble bee	Washington	United States	2014-06-09		1930	Pending				Website
	37	nest	40	occidentalis	Western bumble bee	California	United States	2014-06-15		3153	Pending				Website
	38	nest	41	griseocollis	Brown-belted bumble bee	Delaware	United States	2014-06-15		4286	Pending				Website
	39	nest	42	sp.	Bumble bee	British Columbia	Canada	2014-06-19		2774	Pending				Website
	40	nest	43	impatiens	Common eastern bumble bee	Michigan	United States	2014-06-16		8242	Pending				Website
	41	nest	44	impatiens	Common eastern bumble bee	Minnesota	United States	2014-06-27		3647	Pending				Website
	42	nest	45	sp.	Bumble bee	New York	United States	2014-07-03		7137	Pending				Website
	43	nest	46	caliginosus	Obscure bumble bee	Washington	United States	2014-07-03		5779	Pending				Website
	44	nest	47	griseocollis	Brown-belted bumble bee	Indiana	United States	2014-07-05		8321	Pending				Website
	45	nest	48	impatiens	Common eastern bumble bee	North Carolina	United States	2014-07-07		3754	Pending				Website
	46	nest	49	vosnesenskii	Yellow-faced bumble bee	Washington	United States	2014-07-13		4433	Pending				Website
	47	nest	50	huntii	Hunt's bumble bee	Montana	United States	2014-07-15		3214	Pending				Website
	48	nest	51	nevadensis	Nevada bumble bee	Wyoming	United States	2014-07-16		7574	Pending				Website
	49	nest	52	occidentalis	Western bumble bee	Alberta	Canada	2014-07-12		7630	Verified	2014-08-13	27		Website
	50	nest	53	vagans	Half-black bumble bee	Alberta	Canada	2014-07-17		2136	Pending				Website
	51	nest	54	ternarius	Tri-colored bumble bee	Alberta	Canada	2014-07-23		444	Verified	2019-05-08	5		Website
	52	nest	55	cryptarum	Cryptic bumble bee	Alberta	Canada	2014-07-22		8163	Verified	2019-05-08	5		Website
	53	nest	56	griseocollis	Brown-belted bumble bee	Wyoming	United States	2014-07-25		2557	Pending				Website
	54	nest	57	impatiens	Common eastern bumble bee	Ontario	Canada	2014-07-24		1824	Verified	2016-03-04	34		Website
	55	nest	58	vosnesenskii	Yellow-faced bumble bee	Washington	United States	2014-07-28		7790	Pending				Website
	56	nest	59	impatiens	Common eastern bumble bee	Illinois	United States	2014-07-11		685	Verified	2014-08-01	24		Website
	57	nest	60	bimaculatus	Two-spotted bumble bee	Minnesota	United States	2014-07-20		3622	Verified	2014-08-11	27		Website
	58	nest	61	impatiens	Common eastern bumble bee	Illinois	United States	2014-08-13		685	Pending				Website
	59	nest	62	rufocinctus	Red-belted bumble bee	Manitoba	Canada	2014-08-18		7334	Pending				Website
	60	nest	63	bimaculatus	Two-spotted bumble bee	Minnesota	United States	2014-07-26		969	Pending				Website
	61	nest	64	affinis	Rusty-patched bumble bee	North Dakota	United States	2014-08-01		4110	Pending				Website
	62	nest	65	pensylvanicus	American bumble bee	Texas	United States	2014-08-30		3823	Pending				Website
	63	nest	66	impatiens	Common eastern bumble bee	Massachusetts	United States	2014-09-06		5197	Pending				Website
	64	nest	67	melanopygus	Black-tailed bumble bee	British Columbia	Canada	2014-05-21		4357	Pending				Website
	65	nest	68	impatiens	Common eastern bumble bee	New York	United States	2014-09-25		6416	Pending				Website
	66	nest	70	impatiens	Common eastern bumble bee	Massachusetts	United States	2014-10-08		7011	Pending				Website
	67	nest	71	caliginosus	Obscure bumble bee	California	United States	2015-02-18		6807	Pending				Website
	68	nest	72	sp.	Bumble bee	Maine	United States	2015-03-06		6864	Pending				Website
	69	nest	73	vosnesenskii	Yellow-faced bumble bee	Oregon	United States	2015-03-20		4351	Pending				Website
	70	nest	74	mixtus	Fuzzy-horned bumble bee	British Columbia	Canada	2015-02-22		3240	Pending				Website
	71	nest	75	melanopygus	Black-tailed bumble bee	Oregon	United States	2015-04-20		1659	Pending				Website
	72	nest	76	melanopygus	Black-tailed bumble bee	Oregon	United States	2015-04-18		6952	Pending				Website
	73	nest	77	melanopygus	Black-tailed bumble bee	Oregon	United States	2015-04-25		2700	Pending				Website
	74	nest	78	sp.	Bumble bee	Oregon	United States	2015-04-27		5358	Pending				Website
	75	nest	80	sp.	Bumble bee	Quebec	Canada	2015-05-01		7671	Invalid	2018-03-15	34		Website
	76	nest	81	rufocinctus	Red-belted bumble bee	Washington	United States	2015-05-09		1103	Pending				Website
	77	nest	82	melanopygus	Black-tailed bumble bee	Washington	United States	2015-05-01		4210	Pending				Website
	78	nest	83	melanopygus	Black-tailed bumble bee	Washington	United States	2015-05-09		7186	Pending				Website
	79	nest	84	sp.	Bumble bee	Washington	United States	2015-05-15		4443	Pending				Website
	80	nest	85	vosnesenskii	Yellow-faced bumble bee	Washington	United States	2015-05-15		4443	Pending				Website
	81	nest	90	impatiens	Common eastern bumble bee	Indiana	United States	2015-05-21		6117	Pending				Website
	82	nest	92	impatiens	Common eastern bumble bee	Indiana	United States	2015-04-23		6117	Pending				Website
	83	nest	93	impatiens	Common eastern bumble bee	Missouri	United States	2015-05-22		3796	Pending				Website
	84	nest	94	melanopygus	Black-tailed bumble bee	British Columbia	Canada	2015-06-03		3122	Pending				Website
	85	nest	96	impatiens	Common eastern bumble bee	Michigan	United States	2015-06-08		254	Pending				Website
	86	nest	97	vosnesenskii	Yellow-faced bumble bee	Oregon	United States	2015-06-10		5737	Pending				Website
	87	nest	98	impatiens	Common eastern bumble bee	Florida	United States	2015-06-08		1183	Pending				Website
	88	nest	99	pensylvanicus	American bumble bee	Florida	United States	2015-06-15		2405	Pending				Website
	89	nest	100	vosnesenskii	Yellow-faced bumble bee	Washington	United States	2015-06-22		4443	Pending				Website
	90	nest	101	griseocollis	Brown-belted bumble bee	South Carolina	United States	2015-06-16		1946	Verified	2015-08-17	27		Website
	91	nest	102	cryptarum	Cryptic bumble bee	Alberta	Canada	2015-06-12		7413	Verified	2019-05-14	5		Website
	92	nest	103	vosnesenskii	Yellow-faced bumble bee	Washington	United States	2015-06-28		5056	Pending				Website
	93	nest	104	melanopygus	Black-tailed bumble bee	Washington	United States	2015-05-03		4210	Pending				Website
	94	nest	105	bimaculatus	Two-spotted bumble bee	Indiana	United States	2015-06-30		6117	Pending				Website
	95	nest	106	sp.	Bumble bee	Iowa	United States	2015-07-07		6814	Pending				Website
	96	nest	107	sp.	Bumble bee	Illinois	United States	2015-07-10		6436	Pending				Website
	97	nest	108	fervidus	Yellow bumble bee	Oregon	United States	2015-07-10		898	Pending				Website
	98	nest	109	bimaculatus	Two-spotted bumble bee	Ontario	Canada	2015-07-08		5277	Verified	2016-03-04	34		Website
	99	nest	110	impatiens	Common eastern bumble bee	Ontario	Canada	2015-07-13		5277	Tentative	2018-03-15	34		Website
	100	nest	111	rufocinctus	Red-belted bumble bee	Ontario	Canada	2015-07-04		990	Verified	2018-03-15	34		Website
	101	nest	112	impatiens	Common eastern bumble bee	Ontario	Canada	2015-07-15		2098	Verified	2016-03-04	34		Website
	102	nest	113	impatiens	Common eastern bumble bee	Ontario	Canada	2015-07-15		4556	Verified	2016-03-04	34		Website
	103	nest	114	sp.	Bumble bee	Pennsylvania	United States	2015-06-05		515	Pending				Website
	104	nest	115	griseocollis	Brown-belted bumble bee	Nebraska	United States	2015-07-19		8242	Pending				Website
	105	nest	116	bimaculatus	Two-spotted bumble bee	Ontario	Canada	2015-07-20		2070	Verified	2018-03-15	34		Website
	106	nest	117	sp.	Bumble bee	Colorado	United States	2015-07-20		3132	Pending				Website
	107	nest	118	frigidus	Bombus frigidus	Manitoba	Canada	2015-07-22		921	Pending				Website
	108	nest	119	impatiens	Common eastern bumble bee	Ontario	Canada	2015-07-13		2501	Verified	2018-03-15	34		Website
	109	nest	121	variabilis	Variable cuckoo bumble bee	Illinois	United States	2015-07-26		7061	Pending				Website
	110	nest	122	terricola	Yellow-banded bumble bee	Manitoba	Canada	2015-07-26		4319	Pending				Website
	111	nest	123	impatiens	Common eastern bumble bee	New York	United States	2015-07-29		4195	Pending				Website
	112	nest	124	auricomus	Black and gold bumble bee	Ohio	United States	2015-07-29		3371	Verified	2017-11-23	26		Website
	113	nest	125	kirbiellus	High country bumble bee	Colorado	United States	2015-07-31		985	Pending				Website
	114	nest	126	huntii	Hunt's bumble bee	Alberta	Canada	2015-08-01		754	Pending				Website
	115	nest	127	griseocollis	Brown-belted bumble bee	Wisconsin	United States	2015-07-25		5851	Pending				Website
	116	nest	128	bimaculatus	Two-spotted bumble bee	Wisconsin	United States	2013-05-30		5851	Pending				Website
	117	nest	129	sp.	Bumble bee	New Mexico	United States	2015-08-06		5229	Pending				Website
	118	nest	130	sp.	Bumble bee	New Mexico	United States	2015-08-06		5229	Pending				Website
	119	nest	131	variabilis	Variable cuckoo bumble bee	Illinois	United States	2015-08-05		6595	Pending				Website
	120	nest	133	sp.	Bumble bee	Newfoundland and Labrador	Canada	2015-08-09		4686	Verified	2018-07-24	34		Website
	121	nest	134	sp.	Bumble bee	Ontario	Canada	2015-08-10		468	Tentative	2018-03-15	34		Website
	122	nest	136	impatiens	Common eastern bumble bee	Nebraska	United States	2015-08-23		8242	Pending				Website
	123	nest	137	impatiens	Common eastern bumble bee	Illinois	United States	2015-07-28		685	Pending				Website
	124	nest	138	impatiens	Common eastern bumble bee	Illinois	United States	2014-08-20		685	Pending				Website
	125	nest	139	impatiens	Common eastern bumble bee	Illinois	United States	2014-08-20		685	Pending				Website
	126	nest	140	auricomus	Black and gold bumble bee	Illinois	United States	2014-06-27		685	Pending				Website
	127	nest	141	auricomus	Black and gold bumble bee	Illinois	United States	2013-07-25		685	Pending				Website
	128	nest	142	fraternus	Southern plains bumble bee	South Dakota	United States	2015-09-01		3344	Pending				Website
	129	nest	143	impatiens	Common eastern bumble bee	Ontario	Canada	2015-07-01		3373	Verified	2016-03-04	34		Website
	130	nest	144	pensylvanicus	American bumble bee	Texas	United States	2015-09-16		5903	Pending				Website
	131	nest	145	impatiens	Common eastern bumble bee	Ohio	United States	2015-09-04		521	Verified	2017-11-23	26		Website
	132	nest	146	affinis	Rusty-patched bumble bee	Pennsylvania	United States	2015-09-25		7830	Pending				Website
	133	nest	147	impatiens	Common eastern bumble bee	Illinois	United States	2014-09-01		685	Pending				Website
	134	nest	148	variabilis	Variable cuckoo bumble bee	Ohio	United States	2015-10-02		1569	Pending				Website
	135	nest	149	sp.	Bumble bee	Washington	United States	2010-06-19		2969	Pending				Website
	136	nest	150	sp.	Bumble bee	Massachusetts	United States	2015-10-04		5906	Pending				Website
	137	nest	151	vosnesenskii	Yellow-faced bumble bee	British Columbia	Canada	2016-03-29		3240	Pending				Website
	138	nest	152	sp.	Bumble bee	Washington	United States	2016-04-13		1224	Pending				Website
	139	nest	153	bifarius	Two-form bumble bee	British Columbia	Canada	2016-04-18		2819	Pending				Website
	140	nest	154	nevadensis	Nevada bumble bee	Oregon	United States	2016-04-22		3388	Pending				Website
	141	nest	155	sp.	Bumble bee	California	United States	2016-05-07		6628	Pending				Website
	142	nest	156	Unknown	Not a bumble bee	Ontario	Canada	2016-05-21		1734	Invalid	2018-03-15	34		Website
	143	nest	157	sp.	Bumble bee	Washington	United States	2016-05-22		7580	Pending				Website
	144	nest	158	affinis	Rusty-patched bumble bee	South Carolina	United States	2016-05-28		2135	Pending				Website
	145	nest	159	sp.	Bumble bee	California	United States	2016-04-15		6810	Pending				Website
	146	nest	160	bimaculatus	Two-spotted bumble bee	Minnesota	United States	2016-06-11		3095	Pending				Website
	147	nest	161	sp.	Bumble bee	California	United States	2016-06-01		2553	Pending				Website
	148	nest	162	auricomus	Black and gold bumble bee	Oklahoma	United States	2016-06-13		3196	Pending				Website
	149	nest	163	sp.	Bumble bee	Nova Scotia	Canada	2016-06-16		7398	Tentative	2018-03-15	34		Website
	150	nest	165	sp.	Bumble bee	Colorado	United States	2015-06-21		6599	Pending				Website
	151	nest	166	sp.	Bumble bee	Oregon	United States	2016-06-21		2969	Pending				Website
	152	nest	167	vosnesenskii	Yellow-faced bumble bee	Washington	United States	2016-06-28		4665	Pending				Website
	153	nest	168	sp.	Bumble bee	Washington	United States	2016-07-02		3148	Pending				Website
	154	nest	169	impatiens	Common eastern bumble bee	Minnesota	United States	2016-07-06		4107	Pending				Website
	155	nest	170	auricomus	Black and gold bumble bee	Minnesota	United States	2016-07-07		4107	Pending				Website
	156	nest	171	variabilis	Variable cuckoo bumble bee	Illinois	United States	2016-07-08		4184	Pending				Website
	157	nest	172	bimaculatus	Two-spotted bumble bee	Minnesota	United States	2016-07-08		7880	Pending				Website
	158	nest	173	bimaculatus	Two-spotted bumble bee	Ontario	Canada	2016-07-09		770	Verified	2018-03-15	34		Website
	159	nest	174	Unknown	Not a bumble bee	Ontario	Canada	2016-07-10		7343	Invalid	2018-03-15	34		Website
	160	nest	175	affinis	Rusty-patched bumble bee	Minnesota	United States	2016-07-01		7917	Pending				Website
	161	nest	176	fervidus	Yellow bumble bee	Colorado	United States	2016-07-14		8099	Pending				Website
	162	nest	177	griseocollis	Brown-belted bumble bee	Minnesota	United States	2016-07-17		4107	Pending				Website
	163	nest	178	bimaculatus	Two-spotted bumble bee	Quebec	Canada	2016-07-20		5569	Verified		34		Website
	164	nest	179	sp.	Bumble bee	Virginia	United States	2016-07-23		8396	Pending				Website
	165	nest	180	rufocinctus	Red-belted bumble bee	Ontario	Canada	2016-07-24		676	Verified	2018-03-15	34		Website
	166	nest	181	griseocollis	Brown-belted bumble bee	Quebec	Canada	2016-07-21		4648	Verified	2018-03-15	34		Website
	167	nest	182	sp.	Bumble bee	Ontario	Canada	2016-07-27		3677	Verified	2018-03-15	34		Website
	168	nest	183	sp.	Bumble bee	Manitoba	Canada	2016-07-26		3753	Pending				Website
	169	nest	184	sp.	Bumble bee	British Columbia	Canada	2016-04-09		7977	Pending				Website
	170	nest	185	impatiens	Common eastern bumble bee	Ontario	Canada	2016-07-28		3869	Verified	2018-03-15	34		Website
	171	nest	187	sp.	Bumble bee	Ontario	Canada	2016-07-30		3447	Verified	2018-03-15	34		Website
	172	nest	188	sylvicola	Forest bumble bee	Saskatchewan	Canada	2016-07-30		8006	Pending				Website
	173	nest	189	sp.	Bumble bee	Saskatchewan	Canada	2016-07-30		3265	Pending				Website
	174	nest	190	sp.	Bumble bee	Virginia	United States	2016-07-22		8396	Pending				Website
	175	nest	191	fervidus	Yellow bumble bee	California	United States	2016-08-02		3962	Pending				Website
	176	nest	192	impatiens	Common eastern bumble bee	Ontario	Canada	2016-06-13		316	Verified	2018-03-15	34		Website
	177	nest	193	pensylvanicus	American bumble bee	Texas	United States	2016-08-02		1835	Pending				Website
	178	nest	194	Unknown	Not a bumble bee	Ontario	Canada	2016-08-01		5472	Invalid	2018-03-15	34		Website
	179	nest	195	Unknown	Not a bumble bee	Ontario	Canada	2016-07-30		5472	Invalid	2018-03-15	34		Website
	180	nest	196	perplexus	Confusing bumble bee	Ontario	Canada	2015-07-30		448	Tentative	2018-03-15	34		Website
	181	nest	197	ternarius	Tri-colored bumble bee	Alberta	Canada	2016-08-03		613	Tentative	2019-05-08	5		Website
	182	nest	198	griseocollis	Brown-belted bumble bee	Ontario	Canada	2016-08-05		425	Tentative	2018-03-15	34		Website
	183	nest	199	centralis	Central bumble bee	Alberta	Canada	2016-08-06		8071	Verified	2019-05-08	5		Website
	184	nest	200	borealis	Northern amber bumble bee	Alberta	Canada	2016-08-05		4605	Verified	2019-05-08	5		Website
	185	nest	201	Unknown	Not a bumble bee	Ontario	Canada	2016-08-08		7358	Invalid	2018-03-15	34		Website
	186	nest	202	vagans, sandersoni or perplexus	Two-yellow striped group	Ontario	Canada	2016-07-31		4153	Verified	2018-03-15	34		Website
	187	nest	203	terricola	Yellow-banded bumble bee	Manitoba	Canada	2016-08-08		2199	Pending				Website
	188	nest	204	sp.	Bumble bee	Pennsylvania	United States	2016-08-06		1834	Pending				Website
	189	nest	224	melanopygus	Black-tailed bumble bee	Saskatchewan	Canada	2016-08-06		6410	Pending				Website
	190	nest	225	terricola	Yellow-banded bumble bee	Saskatchewan	Canada	2016-07-20		6410	Pending				Website
	191	nest	226	bimaculatus	Two-spotted bumble bee	New Brunswick	Canada	2016-08-06		5428	Verified	2018-03-15	34		Website
	192	nest	227	bimaculatus	Two-spotted bumble bee	Ontario	Canada	2016-08-09		1865	Tentative	2018-03-15	34		Website
	193	nest	228	sp.	Bumble bee	Ontario	Canada	2016-08-10		8406	Verified	2018-03-15	34		Website
	194	nest	229	auricomus	Black and gold bumble bee	Minnesota	United States	2016-08-04		4107	Pending				Website
	195	nest	230	huntii	Hunt's bumble bee	Alberta	Canada	2016-08-11		6295	Verified	2019-05-14	5		Website
	196	nest	231	huntii	Hunt's bumble bee	Alberta	Canada	2016-08-11		6295	Verified	2019-05-14	5		Website
	197	nest	232	bimaculatus	Two-spotted bumble bee	Nova Scotia	Canada	2016-08-11		3067	Tentative	2018-03-15	34		Website
	198	nest	233	sp.	Bumble bee	Minnesota	United States	2016-08-11		1041	Pending				Website
	199	nest	234	sp.	Bumble bee	Alberta	Canada	2016-06-28		3134	Pending				Website
	200	nest	235	sylvicola	Forest bumble bee	Saskatchewan	Canada	2016-08-13		8475	Verified	2016-12-26	27		Website
	201	nest	236	impatiens	Common eastern bumble bee	Saskatchewan	Canada	2016-08-13		8475	Verified	2016-12-22	27		Website
	202	nest	237	sp.	Bumble bee	Saskatchewan	Canada	2016-08-01		8475	Verified	2016-12-22	27		Website
	203	nest	238	nevadensis	Nevada bumble bee	Saskatchewan	Canada	2016-08-08		8475	Verified	2016-12-22	27		Website
	204	nest	239	impatiens	Common eastern bumble bee	Ontario	Canada	2016-08-18		6732	Verified	2016-12-22	27		Website
	205	nest	240	sp.	Bumble bee	Alberta	Canada	2016-04-12		7294	Invalid	2016-12-22	27		Website
	206	nest	241	sp.	Bumble bee	Texas	United States	2016-08-18		6825	Verified	2016-12-22	27		Website
	207	nest	242	impatiens	Common eastern bumble bee	Ontario	Canada	2016-08-17		6911	Verified	2016-12-22	27		Website
	208	nest	243	sp.	Bumble bee	Ontario	Canada	2016-08-20		7478	Invalid	2016-12-22	27		Website
	209	nest	244	sp.	Bumble bee	Alberta	Canada	2016-08-13		4722	Invalid	2016-12-22	27		Website
	210	nest	245	sp.	Bumble bee	Ontario	Canada	1969-12-31		6613	Invalid	2016-12-22	27		Website
	211	nest	246	pensylvanicus	American bumble bee	Texas	United States	2016-08-23		1161	Verified	2016-12-22	27		Website
	212	nest	247	pensylvanicus	American bumble bee	Colorado	United States	2016-09-08		3972	Verified	2016-12-22	27		Website
	213	nest	248	sp.	Bumble bee	Saskatchewan	Canada	2016-08-05		4958	Verified	2016-12-22	27		Website
	214	nest	249	impatiens	Common eastern bumble bee	Wisconsin	United States	2016-09-25		2164	Verified	2016-12-22	27		Website
	215	nest	250	sp.	Bumble bee	Quebec	Canada	2016-10-10		6609	Invalid	2016-12-22	27		Website
	216	nest	251	ternarius	Tri-colored bumble bee	Saskatchewan	Canada	2014-08-13		2898	Verified	2016-12-22	27		Website
	217	nest	252	affinis	Rusty-patched bumble bee	Wisconsin	United States	2016-11-03		910	Verified	2016-12-22	27		Website
	218	nest	253	auricomus	Black and gold bumble bee	Wisconsin	United States	2016-07-15		6204	Verified	2016-12-22	27		Website
	219	nest	254	impatiens	Common eastern bumble bee	Wisconsin	United States	2016-07-17		6204	Verified	2016-12-22	27		Website
	220	nest	255	sp.	Bumble bee	Minnesota	United States	2016-08-11		1559	Pending				Website
	221	nest	256	sp.	Bumble bee	Wisconsin	United States	2016-05-30		5851	Pending				Website
	222	nest	257	cryptarum	Cryptic bumble bee	Alberta	Canada	2016-06-19		5851	Verified	2019-05-08	5		Website
	223	nest	258	sp.	Bumble bee	Minnesota	United States	2016-07-01		1886	Pending				Website
	224	nest	259	insularis	Indiscriminant cuckoo bumble bee	Minnesota	United States	2016-08-14		414	Pending				Website
	225	nest	261	sp.	Bumble bee	California	United States	2017-04-04		3199	Pending				Website
	226	nest	262	griseocollis	Brown-belted bumble bee	Wisconsin	United States	2016-07-06		335	Pending				Website
	227	nest	263	caliginosus	Obscure bumble bee	California	United States	2017-04-23		230	Pending				Website
	228	nest	264	terricola	Yellow-banded bumble bee	Nunavut	Canada	2017-04-24		7076	Pending				Website
	229	nest	265	sp.	Bumble bee	Connecticut	United States	2017-04-28		6575	Pending				Website
	230	nest	266	melanopygus	Black-tailed bumble bee	California	United States	2017-05-01		2993	Pending				Website
	231	nest	267	impatiens	Common eastern bumble bee	Ohio	United States	2017-05-07		7748	Pending				Website
	232	nest	268	perplexus	Confusing bumble bee	Ontario	Canada	2015-06-20		8341	Verified	2017-12-06	34		Website
	233	nest	270	sp.	Bumble bee	Oregon	United States	2017-05-19		1556	Pending				Website
	234	nest	271	ternarius	Tri-colored bumble bee	Oregon	United States	2017-05-22		925	Pending				Website
	235	nest	272	sp.	Bumble bee	Oregon	United States	2017-05-20		354	Pending				Website
	236	nest	273	crotchii	Crotch bumble bee	British Columbia	Canada	2017-05-27		649	Pending				Website
	237	nest	274	sp.	Bumble bee	Oregon	United States	2017-05-27		6479	Pending				Website
	238	nest	275	bimaculatus	Two-spotted bumble bee	Michigan	United States	2017-06-01		6917	Pending				Website
	239	nest	277	melanopygus	Black-tailed bumble bee	British Columbia	Canada	2017-05-26		5941	Pending				Website
	240	nest	278	flavifrons	Yellow head bumble bee	Idaho	United States	2017-06-06		226	Pending				Website
	241	nest	280	variabilis	Variable cuckoo bumble bee	Minnesota	United States	2017-06-08		4991	Pending				Website
	242	nest	283	affinis	Rusty-patched bumble bee	Illinois	United States	2017-06-16		702	Pending				Website
	243	nest	284	impatiens	Common eastern bumble bee	Ontario	Canada	2017-06-21		3727	Verified	2018-03-15	34		Website
	244	nest	285	sp.	Bumble bee	Virginia	United States	2017-06-24		7719	Pending				Website
	245	nest	287	vagans	Half-black bumble bee	Saskatchewan	Canada	2017-06-17		8475	Pending				Website
	246	nest	289	variabilis	Variable cuckoo bumble bee	Massachusetts	United States	2017-06-25		6540	Pending				Website
	247	nest	290	impatiens	Common eastern bumble bee	Pennsylvania	United States	2017-06-25		5706	Pending				Website
	248	nest	292	impatiens	Common eastern bumble bee	Wisconsin	United States	2017-06-07		6449	Pending				Website
	249	nest	293	griseocollis	Brown-belted bumble bee	Minnesota	United States	2017-07-02		8122	Pending				Website
	250	nest	294	sp.	Bumble bee	Minnesota	United States	2017-07-03		8318	Pending				Website
	251	nest	295	griseocollis	Brown-belted bumble bee	Illinois	United States	2017-07-04		2646	Pending				Website
	252	nest	296	vagans	Half-black bumble bee	Alberta	Canada	2017-07-04		6444	Pending				Website
	253	nest	297	vagans	Half-black bumble bee	Alberta	Canada	2017-07-04		6444	Pending				Website
	254	nest	299	impatiens	Common eastern bumble bee	Ohio	United States	2017-07-09		2044	Pending	2017-11-23	26		Website
	255	nest	300	sp.	Bumble bee	Wisconsin	United States	2017-07-12		3850	Pending				Website
	256	nest	301	variabilis	Variable cuckoo bumble bee	Massachusetts	United States	2017-06-06		5773	Pending				Website
	257	nest	302	auricomus	Black and gold bumble bee	New Jersey	United States	2017-07-15		7072	Pending				Website
	258	nest	303	cryptarum	Cryptic bumble bee	Alberta	Canada	2017-07-15		1990	Verified	2019-05-08	5		Website
	259	nest	304	sp.	Bumble bee	Ohio	United States	2017-07-16		1286	Pending				Website
	260	nest	305	rufocinctus	Red-belted bumble bee	British Columbia	Canada	2017-07-07		6573	Pending				Website
	261	nest	306	sp.	Bumble bee	Minnesota	United States	2017-07-17		7524	Pending				Website
	262	nest	307	griseocollis	Brown-belted bumble bee	Manitoba	Canada	2017-07-19		4951	Pending				Website
	263	nest	308	impatiens	Common eastern bumble bee	Nova Scotia	Canada	2017-07-16		4863	Verified	2018-03-15	34		Website
	264	nest	309	vosnesenskii	Yellow-faced bumble bee	Oregon	United States	2017-07-21		6877	Verified	2019-06-27	27		Website
	265	nest	310	vagans	Half-black bumble bee	Alberta	Canada	2017-07-24		1207	Pending				Website
	266	nest	311	mixtus	Fuzzy-horned bumble bee	Alberta	Canada	2017-07-25		1207	Pending				Website
	267	nest	312	nevadensis	Nevada bumble bee	Alberta	Canada	2017-07-24		1207	Pending				Website
	268	nest	313	vagans	Half-black bumble bee	Alberta	Canada	2017-07-25		1207	Pending				Website
	269	nest	314	sp.	Bumble bee	Alberta	Canada	2017-07-25		1207	Pending				Website
	270	nest	315	impatiens	Common eastern bumble bee	Ontario	Canada	2017-07-26		5298	Verified	2018-03-15	34		Website
	271	nest	316	fervidus	Yellow bumble bee	Minnesota	United States	2017-07-23		1748	Pending				Website
	272	nest	317	vagans	Half-black bumble bee	Wisconsin	United States	2017-07-16		7337	Pending				Website
	273	nest	318	sp.	Bumble bee	Ontario	Canada	2017-07-29		448	Verified	2018-03-15	34		Website
	274	nest	319	sp.	Bumble bee	Florida	United States	2017-07-30		5593	Pending				Website
	275	nest	320	sp.	Bumble bee	New Jersey	United States	2017-08-01		5977	Pending				Website
	276	nest	321	sp.	Bumble bee	Ontario	Canada	2017-06-24		3677	Tentative	2018-03-15	34		Website
	277	nest	322	impatiens	Common eastern bumble bee	New York	United States	2016-07-29		4352	Pending				Website
	278	nest	323	perplexus	Confusing bumble bee	Iowa	United States	2017-08-02		257	Pending				Website
	279	nest	324	perplexus	Confusing bumble bee	Iowa	United States	2017-08-02		257	Pending				Website
	280	nest	325	griseocollis	Brown-belted bumble bee	Idaho	United States	2017-08-05		7760	Pending				Website
	281	nest	326	sp.	Bumble bee	Massachusetts	United States	2017-08-10		4598	Pending				Website
	282	nest	327	affinis	Rusty-patched bumble bee	Wisconsin	United States	2017-08-10		3391	Pending				Website
	283	nest	328	affinis	Rusty-patched bumble bee	Wisconsin	United States	2017-08-10		3391	Pending				Website
	284	nest	329	griseocollis	Brown-belted bumble bee	Idaho	United States	2017-08-11		7760	Pending				Website
	285	nest	330	griseocollis	Brown-belted bumble bee	Idaho	United States	2017-08-11		7760	Verified	2018-04-05	7		Website
	286	nest	331	impatiens	Common eastern bumble bee	Michigan	United States	2015-07-15		526	Pending				Website
	287	nest	332	sp.	Bumble bee	Colorado	United States	2017-07-30		2387	Pending				Website
	288	nest	333	cryptarum	Cryptic bumble bee	Alberta	Canada	2017-08-08		8335	Verified	2019-05-08	5		Website
	289	nest	334	sp.	Bumble bee	Texas	United States	2017-08-13		1476	Pending				Website
	290	nest	335	sp.	Bumble bee	Alberta	Canada	2017-08-11		1207	Pending				Website
	291	nest	336	sp.	Bumble bee	Alberta	Canada	2017-08-04		1207	Pending				Website
	292	nest	337	griseocollis	Brown-belted bumble bee	Idaho	United States	2017-08-19		7760	Pending				Website
	293	nest	338	griseocollis	Brown-belted bumble bee	Idaho	United States	2017-08-19		7760	Pending				Website
	294	nest	339	auricomus	Black and gold bumble bee	Texas	United States	2017-07-21		6831	Pending				Website
	295	nest	340	impatiens	Common eastern bumble bee	Ontario	Canada	2017-08-27		972	Verified	2018-03-15	34		Website
	296	nest	341	vagans	Half-black bumble bee	British Columbia	Canada	2017-08-07		7872	Pending				Website
	297	nest	342	impatiens	Common eastern bumble bee	Minnesota	United States	2017-08-28		1079	Pending				Website
	298	nest	344	impatiens	Common eastern bumble bee	Ontario	Canada	2017-08-29		4952	Verified	2018-03-15	34		Website
	299	nest	345	impatiens	Common eastern bumble bee	Wisconsin	United States	2017-08-31		3886	Pending				Website
	300	nest	346	impatiens	Common eastern bumble bee	Wisconsin	United States	2017-09-04		4018	Pending				Website
	301	nest	347	impatiens	Common eastern bumble bee	Ontario	Canada	2017-08-02		7587	Verified	2018-03-15	34		Website
	302	nest	351	sp.	Bumble bee	Minnesota	United States	2017-09-22		5351	Pending				Website
	303	nest	354	melanopygus	Black-tailed bumble bee	California	United States	2017-03-31		2890	Pending				Website
	304	nest	357	impatiens	Common eastern bumble bee	Ontario	Canada	2017-08-16		6960	Verified	2018-03-15	34		Website
	305	nest	358	impatiens	Common eastern bumble bee	Prince Edward Island	Canada	2017-10-15		8376	Verified	2018-03-15	34		Website
	306	nest	360	impatiens	Common eastern bumble bee	Maine	United States	2015-07-19		1911	Pending				Website
	307	nest	361	sp.	Bumble bee	Nova Scotia	Canada	2017-10-29		4863	Verified	2018-03-15	34		Website
	308	nest	362	pensylvanicus	American bumble bee	Arizona	United States	2017-10-31		1102	Pending				Website
	309	nest	364	perplexus	Confusing bumble bee	Alberta	Canada	2017-08-03		4467	Verified	2017-12-12	28		Website
	310	nest	365	sp.	Bumble bee	Alberta	Canada	2017-08-03		4467	Pending				Website
	311	nest	366	sp.	Bumble bee	Alberta	Canada	2017-08-03		4467	Pending				Website
	312	nest	367	impatiens	Common eastern bumble bee	Wisconsin	United States	2017-08-06		7814	Pending				Website
changed status from 'verified' to 'invalid', July 20/19	313	nest	368	Unknown	Not a bumble bee	Florida	United States	2017-12-26		7043	Invalid	2018-04-05	7		Website
	314	nest	369	sp.	Bumble bee	California	United States	2018-02-06		1231	Pending				Website
	315	nest	370	bimaculatus	Two-spotted bumble bee	Ontario	Canada	2016-07-10		8341	Verified	2018-04-12	34		Website
	316	nest	371	rufocinctus	Red-belted bumble bee	Ontario	Canada	2016-07-12		8341	Verified	2018-04-12	34		Website
	317	nest	372	vosnesenskii	Yellow-faced bumble bee	Oregon	United States	2018-05-02		4739	Pending				Website
	318	nest	374	impatiens	Common eastern bumble bee	Illinois	United States	2018-05-04		589	Pending				Website
	319	nest	375	sp.	Bumble bee	Washington	United States	2018-05-05		5019	Pending				Website
	320	nest	376	fervidus	Yellow bumble bee	Pennsylvania	United States	2018-05-07		3575	Pending				Website
	321	nest	377	griseocollis	Brown-belted bumble bee	New Jersey	United States	2018-05-07		8197	Pending				Website
	322	nest	378	melanopygus	Black-tailed bumble bee	Washington	United States	2018-05-09		7186	Pending				Website
	323	nest	380	melanopygus	Black-tailed bumble bee	Oregon	United States	2018-05-13		6042	Pending				Website
	324	nest	381	melanopygus	Black-tailed bumble bee	Oregon	United States	2018-05-13		7599	Pending				Website
	325	nest	382	sp.	Bumble bee	Washington	United States	2018-05-06		5176	Pending				Website
	326	nest	383	flavifrons	Yellow head bumble bee	British Columbia	Canada	2018-05-17		4966	Pending				Website
	327	nest	384	ternarius	Tri-colored bumble bee	British Columbia	Canada	2018-05-14		4966	Pending				Website
	328	nest	386	melanopygus	Black-tailed bumble bee	Oregon	United States	2018-05-05		2801	Pending				Website
	329	nest	387	bifarius	Two-form bumble bee	Washington	United States	2018-05-19		3747	Pending				Website
	330	nest	388	sp.	Bumble bee	California	United States	2018-05-20		1875	Pending				Website
	331	nest	390	bimaculatus	Two-spotted bumble bee	Ohio	United States	2018-05-22		5043	Pending				Website
	332	nest	391	Unknown	Not a bumble bee	Ontario	Canada	2018-05-27		352	Invalid	2018-07-20	34		Website
	333	nest	392	fervidus	Yellow bumble bee	Idaho	United States	2018-05-29		595	Pending				Website
	334	nest	393	sp.	Bumble bee	Oregon	United States	2018-06-01		4525	Pending				Website
	335	nest	394	insularis	Indiscriminant cuckoo bumble bee	Washington	United States	2018-05-20		2176	Pending				Website
	336	nest	396	sp.	Bumble bee	Washington	United States	2018-05-26		4474	Pending				Website
	337	nest	397	melanopygus	Black-tailed bumble bee	Oregon	United States	2018-05-17		6016	Pending				Website
	338	nest	399	griseocollis	Brown-belted bumble bee	Ontario	Canada	2018-06-17		971	Verified	2018-07-20	34		Website
	339	nest	401	sp.	Bumble bee	Washington	United States	2018-06-13		5145	Pending				Website
	340	nest	403	bifarius	Two-form bumble bee	Washington	United States	2018-05-07		7044	Pending				Website
	341	nest	404	rufocinctus	Red-belted bumble bee	Washington	United States	2018-04-15		8180	Pending				Website
	342	nest	405	vandykei	van Dyke bumble bee	Washington	United States	2018-06-15		3559	Pending				Website
	343	nest	406	occidentalis	Western bumble bee	Washington	United States	2018-06-18		3381	Pending				Website
	344	nest	407	sp.	Bumble bee	Mississippi	United States	2018-06-09		4105	Pending				Website
	345	nest	409	vosnesenskii	Yellow-faced bumble bee	Oregon	United States	2018-06-21		2969	Pending				Website
	346	nest	410	vosnesenskii	Yellow-faced bumble bee	British Columbia	Canada	2018-06-18		4745	Pending				Website
	347	nest	412	bimaculatus	Two-spotted bumble bee	Ontario	Canada	2018-06-26		3093	Verified	2018-07-20	34		Website
	348	nest	421	sandersoni	Sanderson bumble bee	Massachusetts	United States	2018-06-25		4705	Pending				Website
	349	nest	422	melanopygus	Black-tailed bumble bee	Washington	United States	2018-05-16		5329	Pending				Website
	350	nest	423	huntii	Hunt's bumble bee	Oregon	United States	2018-06-30		8390	Pending				Website
	351	nest	424	rufocinctus	Red-belted bumble bee	Washington	United States	2018-07-01		6664	Pending				Website
	352	nest	425	appositus	White-shouldered bumble bee	Idaho	United States	2018-06-30		2415	Pending				Website
	353	nest	426	vagans, sandersoni or perplexus	Two-yellow striped group	Ontario	Canada	2018-07-02		7309	Verified	2018-07-20	34		Website
	354	nest	427	impatiens	Common eastern bumble bee	Michigan	United States	2018-05-24		6574	Pending				Website
	355	nest	428	vosnesenskii	Yellow-faced bumble bee	California	United States	2018-07-02		478	Pending				Website
	356	nest	429	sp.	Bumble bee	Connecticut	United States	2018-06-24		2430	Pending				Website
	357	nest	431	vosnesenskii	Yellow-faced bumble bee	Washington	United States	2018-07-03		1740	Pending				Website
	358	nest	432	pensylvanicus	American bumble bee	Georgia	United States	2018-07-04		5050	Pending				Website
	359	nest	433	occidentalis	Western bumble bee	Washington	United States	2018-05-31		6786	Pending				Website
	360	nest	434	griseocollis	Brown-belted bumble bee	Maryland	United States	2018-07-04		6660	Pending				Website
	361	nest	435	griseocollis	Brown-belted bumble bee	New Jersey	United States	2018-07-05		1526	Pending				Website
	362	nest	438	affinis	Rusty-patched bumble bee	Wisconsin	United States	2018-06-30		7141	Pending				Website
	363	nest	439	sp.	Bumble bee	Washington	United States	2018-05-05		2134	Pending				Website
	364	nest	440	affinis	Rusty-patched bumble bee	Illinois	United States	2018-07-11		7572	Pending				Website
	365	nest	441	sp.	Bumble bee	Idaho	United States	2018-07-13		8052	Pending				Website
	366	nest	442	impatiens	Common eastern bumble bee	New York	United States	2018-07-14		4493	Verified	2018-07-17	27		Website
	367	nest	443	impatiens	Common eastern bumble bee	Ontario	Canada	2018-07-19		5262	Verified	2018-07-20	34		Website
	368	nest	444	centralis	Central bumble bee	Montana	United States	2018-07-19		8266	Pending				Website
	369	nest	445	occidentalis	Western bumble bee	Colorado	United States	2018-07-21		5726	Pending				Website
	370	nest	446	sp.	Bumble bee	California	United States	2018-07-22		3976	Pending				Website
	371	nest	448	sp.	Bumble bee	Oregon	United States	2018-08-03		6858	Pending				Website
	372	nest	450	pensylvanicus	American bumble bee	New Mexico	United States	2018-08-04		4880	Pending				Website
	373	nest	451	bifarius	Two-form bumble bee	Washington	United States	2018-08-07		8408	Pending				Website
	374	nest	452	sp.	Bumble bee	Iowa	United States	2018-08-08		2696	Pending				Website
	375	nest	454	sp.	Bumble bee	Ontario	Canada	2018-08-08		5262	Verified	2019-06-10	34		Website
	376	nest	455	vosnesenskii	Yellow-faced bumble bee	Oregon	United States	2018-08-08		1316	Pending				Website
	377	nest	456	vosnesenskii	Yellow-faced bumble bee	Oregon	United States	2018-08-15		6550	Pending				Website
	378	nest	457	impatiens	Common eastern bumble bee	Iowa	United States	2018-08-21		4814	Pending				Website
	379	nest	458	melanopygus	Black-tailed bumble bee	Oregon	United States	2018-07-29		5952	Pending				Website
	380	nest	459	fervidus	Yellow bumble bee	Wisconsin	United States	2018-08-26		1977	Pending				Website
	381	nest	460	huntii	Hunt's bumble bee	Alberta	Canada	2018-08-25		388	Pending				Website
	382	nest	461	frigidus	Bombus frigidus	Minnesota	United States	2018-08-26		21	Pending				Website
	383	nest	462	sp.	Bumble bee	Unknown		2018-08-27		3130	Pending				Website
	384	nest	463	vagans	Half-black bumble bee	Saskatchewan	Canada	2018-08-28		5500	Pending				Website
	385	nest	464	sp.	Bumble bee	Nebraska	United States	2018-09-09		3434	Pending				Website
	386	nest	465	sp.	Bumble bee	Ontario	Canada	2018-09-15		448	Verified	2019-06-10	34		Website
	387	nest	466	sp.	Bumble bee	New York	United States	2018-09-24		6980	Pending				Website
	388	nest	467	impatiens	Common eastern bumble bee	Ontario	Canada	2018-09-28		6488	Verified	2019-02-01	34		Website
	389	nest	469	melanopygus	Black-tailed bumble bee	California	United States	2012-05-15		4680	Pending				Website
	390	nest	470	bifarius	Two-form bumble bee	California	United States	2019-03-10		5924	Pending				Website
	391	nest	471	melanopygus	Black-tailed bumble bee	Oregon	United States	2018-07-01		7791	Pending				Website
	392	nest	472	sp.	Bumble bee	California	United States	2017-05-03		3431	Pending				Website
	393	nest	473	melanopygus	Black-tailed bumble bee	California	United States	2019-04-13		1541	Pending				Website
	394	nest	474	sp.	Bumble bee	British Columbia	Canada	2018-06-09		207	Pending				Website
	395	nest	475	melanopygus	Black-tailed bumble bee	California	United States	2019-04-20		6146	Pending				Website
	396	nest	478	melanopygus	Black-tailed bumble bee	Washington	United States	2019-05-05		7186	Pending				Website
	397	nest	479	melanopygus	Black-tailed bumble bee	Washington	United States	2019-05-05		7186	Pending				Website
	398	nest	480	vosnesenskii	Yellow-faced bumble bee	California	United States	2019-05-03		3756	Pending				Website
	399	nest	482	sp.	Bumble bee	Oregon	United States	2019-05-10		5737	Pending				Website
	400	nest	483	kirbiellus	High country bumble bee	Washington	United States	2019-05-01		3136	Pending				Website
	401	nest	484	impatiens	Common eastern bumble bee	Georgia	United States	2019-04-22		8354	Pending				Website
	402	nest	486	bimaculatus	Two-spotted bumble bee	Tennessee	United States	2019-05-14		2780	Pending				Website
	403	nest	487	impatiens	Common eastern bumble bee	Indiana	United States	2019-05-14		7681	Pending				Website
	404	nest	488	sp.	Bumble bee	North Carolina	United States	2019-05-16		5746	Pending				Website
	405	nest	489	sp.	Bumble bee	North Carolina	United States	2019-05-16		5746	Pending				Website
	406	nest	490	sp.	Bumble bee	Oregon	United States	2016-05-11		4025	Pending				Website
	407	nest	492	caliginosus	Obscure bumble bee	Oregon	United States	2019-05-23		8053	Pending				Website
	408	nest	493	sp.	Bumble bee	Ohio	United States	2019-05-27		3731	Pending				Website
	409	nest	494	centralis	Central bumble bee	Oregon	United States	2019-05-23		136	Pending				Website
	410	nest	495	fervidus	Yellow bumble bee	New Mexico	United States	2019-04-26		1599	Pending				Website
	411	nest	496	sp.	Bumble bee	Idaho	United States	2019-05-30		5279	Pending				Website
	412	nest	497	sp.	Bumble bee	Idaho	United States	2019-05-14		8219	Pending				Website
	413	nest	499	ternarius	Tri-colored bumble bee	Saskatchewan	Canada	2015-07-05		4460	Pending				Website
	414	nest	500	ternarius	Tri-colored bumble bee	Saskatchewan	Canada	2018-06-24		4460	Pending				Website
	415	nest	501	caliginosus	Obscure bumble bee	Oregon	United States	2019-06-08		5990	Pending				Website
	416	nest	502	melanopygus	Black-tailed bumble bee	Washington	United States	2019-06-09		6718	Pending				Website
	417	nest	503	griseocollis	Brown-belted bumble bee	South Dakota	United States	2019-06-08		2720	Pending				Website
	418	nest	504	mixtus	Fuzzy-horned bumble bee	British Columbia	Canada	2019-06-10		8431	Pending				Website
	419	nest	505	sp.	Bumble bee	Kentucky	United States	2019-06-11		4027	Pending				Website
	420	nest	506	fervidus	Yellow bumble bee	Washington	United States	2019-06-15		1920	Pending				Website
	421	nest	508	sp.	Bumble bee	Minnesota	United States	2019-06-17		480	Pending				Website
	422	nest	511	impatiens	Common eastern bumble bee	Iowa	United States	2019-06-22		5210	Pending				Website
	423	nest	512	sp.	Bumble bee	Idaho	United States	2019-06-22		6466	Pending				Website
	424	nest	513	affinis	Rusty-patched bumble bee	Michigan	United States	2019-06-01		5133	Pending				Website
	425	nest	515	sp.	Bumble bee	Minnesota	United States	2019-06-24		4256	Pending				Website
	426	nest	516	vosnesenskii	Yellow-faced bumble bee	Washington	United States	2019-06-29		5740	Pending				Website
	427	nest	518	bimaculatus	Two-spotted bumble bee	New York	United States	2019-07-02		8097	Pending				Website
	428	nest	520	borealis	Northern amber bumble bee	Ontario	Canada	2019-07-03		8010	Verified	2019-07-19	34		Website
	429	nest	521	fervidus	Yellow bumble bee	Minnesota	United States	2019-07-03		6043	Pending				Website
	430	nest	522	occidentalis	Western bumble bee	Washington	United States	2019-07-05		5588	Pending				Website
	431	nest	523	griseocollis	Brown-belted bumble bee	Illinois	United States	2019-06-25		245	Pending				Website
	432	nest	525	sp.	Bumble bee	Kansas	United States	2019-06-26		8303	Pending				Website
	433	nest	526	vosnesenskii	Yellow-faced bumble bee	British Columbia	Canada	2019-07-06		5941	Pending				Website
	434	nest	527	vosnesenskii	Yellow-faced bumble bee	Oregon	United States	2019-07-06		871	Pending				Website
	435	nest	528	sp.	Bumble bee	Ontario	Canada	2019-07-03		1639	Verified	2019-07-19	34		Website
	436	nest	529	melanopygus	Black-tailed bumble bee	British Columbia	Canada	2019-05-29		2774	Pending				Website
	437	nest	530	sp.	Bumble bee	British Columbia	Canada	2019-05-15		2774	Pending				Website
	438	nest	531	griseocollis	Brown-belted bumble bee	Texas	United States	2019-07-04		1640	Pending				Website
	439	nest	532	sp.	Bumble bee	Kentucky	United States	2019-07-08		3313	Pending				Website
	440	nest	533	auricomus	Black and gold bumble bee	Wisconsin	United States	2019-07-10		2372	Pending				Website
	441	nest	534	mixtus	Fuzzy-horned bumble bee	Oregon	United States	2019-07-01		8146	Pending				Website
	442	nest	535	griseocollis	Brown-belted bumble bee	Missouri	United States	2019-07-12		806	Pending				Website
	443	nest	536	impatiens	Common eastern bumble bee	Ohio	United States	2019-07-12		1867	Pending				Website
	444	nest	538	bimaculatus	Two-spotted bumble bee	Ontario	Canada	2019-07-15		270	Verified	2019-07-19	34		Website
	445	bee	5	occidentalis	Western bumble bee	Washington	United States	2013-08-21	Female	6877	Verified	2014-09-29	27	occidentalis !	Website
	446	bee	6	griseocollis	Brown-belted bumble bee	Georgia	United States	2013-08-25	Female	37	Verified	2014-01-22	16	auricomus	Website
	447	bee	8	occidentalis	Western bumble bee	Washington	United States	2013-08-21	Female	6877	Verified	2013-08-28	27	occidentalis !	Website
	448	bee	9	fervidus	Yellow bumble bee	Oregon	United States	2012-06-18	Female	6877	Verified	2014-10-22	27	fervidus !	Website
	449	bee	10	appositus	White-shouldered bumble bee	Oregon	United States	2012-06-18	Female	6877	Verified	2013-08-28	27	appositus !	Website
	450	bee	12	appositus	White-shouldered bumble bee	Oregon	United States	2012-06-18	Female	6877	Verified	2014-10-22	27	appositus !	Website
	451	bee	13	affinis	Rusty-patched bumble bee	Wisconsin	United States	2013-08-20	Female	1568	Verified	2013-09-04	27	affinis !	Website
	452	bee	14	affinis	Rusty-patched bumble bee	Wisconsin	United States	2013-08-15	Female	1568	Verified	2013-09-04	27	affinis !	Website
	453	bee	15	impatiens	Common eastern bumble bee	Ontario	Canada	2013-06-27	Female	8341	Verified	2015-11-19	30	impatiens !	Website
	454	bee	16	bimaculatus	Two-spotted bumble bee	Ontario	Canada	2013-07-19	Female	8341	Verified	2013-09-04	27	bimaculatus !	Website
	455	bee	18	occidentalis	Western bumble bee	Montana	United States	2013-08-28	Female	3687	Verified	2014-01-28	27	occidentalis !	Website
	456	bee	20	occidentalis	Western bumble bee	Idaho	United States	2013-07-13	Female	6877	Verified	2014-01-28	27	occidentalis !	Website
	457	bee	21	borealis	Northern amber bumble bee	Saskatchewan	Canada	2013-07-17	Female	6877	Verified	2014-10-22	27	borealis !	Website
	458	bee	22	flavifrons	Yellow head bumble bee	Washington	United States	2013-05-19	Not Determined	5876	Verified	2016-03-03	27	flavifrons !	Website
	459	bee	24	vagans	Half-black bumble bee	Vermont	United States	2013-09-06	Not Determined	5034	Verified	2016-03-03	27	vagans !	Website
	460	bee	25	mixtus	Fuzzy-horned bumble bee	Washington	United States	2013-03-28	Not Determined	5876	Verified	2016-03-03	27	mixtus !	Website
	461	bee	26	appositus	White-shouldered bumble bee	Wyoming	United States	2012-08-20	Female	963	Verified	2014-03-27	27	appositus !	Website
	462	bee	27	occidentalis	Western bumble bee	Wyoming	United States	2012-07-18	Male	963	Verified	2013-09-23	27	occidentalis !	Website
	463	bee	31	ternarius	Tri-colored bumble bee	Quebec	Canada	2005-07-11	Female	37	Verified	2014-02-13	2	ternarius !	Website
	464	bee	32	vosnesenskii	Yellow-faced bumble bee	Oregon	United States	2012-06-29	Female	6877	Verified	2014-10-22	27	vosnesenskii !	Website
	465	bee	33	impatiens	Common eastern bumble bee	Ontario	Canada	2013-07-16	Female	2473	Verified	2014-04-16	30	impatiens !	Website
	466	bee	34	Unknown	Not a bumble bee	Ontario	Canada	2013-07-28	Male	2473	Invalid	2014-04-16	30	sp.	Website
	467	bee	35	sp.	Bumble bee	Ontario	Canada	2013-07-19	Not Determined	2473	Verified	2016-03-03	27	sp. !	Website
	468	bee	36	appositus	White-shouldered bumble bee	Washington	United States	2013-09-01	Female	5876	Verified	2013-11-04	27	appositus !	Website
	469	bee	37	ternarius	Tri-colored bumble bee	Vermont	United States	2013-09-03	Not Determined	5034	Verified	2016-03-03	27	ternarius !	Website
	470	bee	38	pensylvanicus	American bumble bee	Minnesota	United States	2013-08-08	Not Determined	5034	Verified	2016-03-03	27	pensylvanicus !	Website
	471	bee	40	griseocollis	Brown-belted bumble bee	Oregon	United States	2013-08-06	Male	2873	Verified	2013-11-04	27	griseocollis !	Website
	472	bee	41	impatiens	Common eastern bumble bee	Wisconsin	United States	2011-08-11	Not Determined	2873	Verified	2016-03-03	27	impatiens !	Website
	473	bee	42	citrinus	Lemon cuckoo bumble bee	Wisconsin	United States	2010-08-11	Male	2873	Verified	2014-02-04	30	citrinus !	Website
	474	bee	43	auricomus	Black and gold bumble bee	Wisconsin	United States	2011-08-17	Female	2873	Verified	2013-11-04	27	auricomus !	Website
	475	bee	44	Unknown	Not a bumble bee	Quebec	Canada	2013-07-30	Not Determined	5841	Invalid	2017-09-27	34	rufocinctus	Website
	476	bee	45	auricomus	Black and gold bumble bee	Wisconsin	United States	2011-08-24	Not Determined	2873	Verified	2016-03-03	27	auricomus !	Website
	477	bee	50	melanopygus	Black-tailed bumble bee	Alberta	Canada	2012-04-11	Female	1094	Verified	2014-11-07	8	melanopygus !	Website
	478	bee	56	terricola	Yellow-banded bumble bee	Saskatchewan	Canada	2013-07-13	Female	6877	Verified	2014-01-28	27	terricola !	Website
	479	bee	57	affinis	Rusty-patched bumble bee	Illinois	United States	2013-07-25	Female	6877	Verified	2014-01-22	16	affinis !	Website
	480	bee	58	occidentalis	Western bumble bee	Oregon	United States	2013-08-14	Female	6877	Verified	2014-01-28	29	occidentalis !	Website
	481	bee	59	occidentalis	Western bumble bee	Oregon	United States	2012-08-30	Female	6877	Verified	2014-09-29	27	occidentalis !	Website
	482	bee	61	vosnesenskii	Yellow-faced bumble bee	Oregon	United States	2013-06-16	Female	6877	Verified	2014-10-22	27	vosnesenskii !	Website
	483	bee	62	flavifrons	Yellow head bumble bee	Washington	United States	2011-08-18	Female	6877	Verified	2014-10-22	27	flavifrons !	Website
	484	bee	63	bifarius	Two-form bumble bee	California	United States	2009-06-16	Female	6877	Verified	2014-01-20	21	bifarius !	Website
	485	bee	64	rufocinctus	Red-belted bumble bee	California	United States	2003-06-07	Female	6877	Verified	2014-10-22	27	rufocinctus !	Website
	486	bee	65	melanopygus	Black-tailed bumble bee	Oregon	United States	2012-05-10	Female	6877	Verified	2014-01-23	27	melanopygus !	Website
	487	bee	66	occidentalis	Western bumble bee	Oregon	United States	2013-08-07	Male	6877	Verified	2013-12-13	27	occidentalis !	Website
	488	bee	67	occidentalis	Western bumble bee	Oregon	United States	2013-08-07	Female	6877	Verified	2013-12-13	27	occidentalis	Website
	489	bee	68	griseocollis	Brown-belted bumble bee	Minnesota	United States	2012-06-20	Not Determined	1094	Verified	2016-03-03	27	griseocollis !	Website
	490	bee	69	Unknown	Not a bumble bee	Wisconsin	United States	2013-08-28	Female	6877	Invalid	2017-08-11	27	impatiens	Website
	491	bee	70	impatiens	Common eastern bumble bee	Wisconsin	United States	2013-08-28	Female	6877	Verified	2014-01-29	27	impatiens !	Website
	492	bee	74	occidentalis	Western bumble bee	California	United States	2013-07-30	Female	2873	Verified	2014-01-28	27	occidentalis !	Website
	493	bee	75	Unknown	Not a bumble bee	Oregon	United States	2014-01-08	Female	1092	Invalid	2017-12-01	27	mixtus	Website
	494	bee	76	occidentalis	Western bumble bee	British Columbia	Canada	2013-07-29	Male	8014	Verified	2014-01-28	27	occidentalis !	Website
	495	bee	79	Unknown	Not a bumble bee	Oregon	United States	2014-01-08	Female	1092	Invalid	2017-12-01	27	flavidus	Website
	496	bee	80	Unknown	Not a bumble bee	Oregon	United States	2014-01-01	Female	1092	Invalid	2017-12-01	27	bifarius	Website
	497	bee	81	Unknown	Not a bumble bee	Oregon	United States	2014-01-01	Female	1092	Invalid	2017-12-01	27	bifarius	Website
	498	bee	82	Unknown	Not a bumble bee	Idaho	United States	2014-01-01	Female	1092	Invalid	2017-08-09	27	bifarius	Website
	499	bee	86	bimaculatus	Two-spotted bumble bee	Ontario	Canada	2013-04-27	Female	8341	Verified	2014-04-16	30	bimaculatus !	Website
	500	bee	87	sp.	Bumble bee	Ontario	Canada	2013-07-10	Not Determined	2473	Verified	2016-03-03	27	sp. !	Website
	501	bee	88	affinis	Rusty-patched bumble bee	Minnesota	United States	2012-08-21	Female	3098	Verified	2014-05-27	30	affinis !	Website
	502	bee	89	auricomus	Black and gold bumble bee	Minnesota	United States	2012-07-17	Not Determined	3098	Verified	2016-03-03	27	auricomus !	Website
	503	bee	90	perplexus	Confusing bumble bee	Minnesota	United States	2012-07-07	Not Determined	3098	Verified	2016-03-03	27	perplexus !	Website
	504	bee	91	affinis	Rusty-patched bumble bee	Minnesota	United States	2012-07-14	Male	3098	Verified	2014-01-28	27	affinis !	Website
	505	bee	92	ternarius	Tri-colored bumble bee	Minnesota	United States	2012-07-17	Female	3098	Verified	2015-08-26	7	ternarius !	Website
	506	bee	93	ternarius	Tri-colored bumble bee	Ontario	Canada	2013-08-16	Not Determined	2591	Verified	2016-03-03	27	ternarius !	Website
	507	bee	94	auricomus	Black and gold bumble bee	Minnesota	United States	2013-06-27	Not Determined	3098	Verified	2016-03-03	27	auricomus !	Website
	508	bee	95	Unknown	Not a bumble bee	Quebec	Canada	2013-04-28	Male	8477	Invalid	2014-01-29	30	sp.	Website
	509	bee	96	impatiens	Common eastern bumble bee	Florida	United States	2013-11-18	Not Determined	6760	Verified	2016-03-03	27	impatiens !	Website
	510	bee	97	impatiens	Common eastern bumble bee	Florida	United States	2013-11-18	Not Determined	6760	Verified	2016-03-03	27	impatiens !	Website
	511	bee	98	Unknown	Not a bumble bee	Oregon	United States	2013-09-18	Not Determined	2648	Invalid	2017-11-23	25	sp.	Website
	512	bee	99	vosnesenskii or caliginosus	Yellow-faced group	Oregon	United States	2013-09-18	Not Determined	2648	Verified	2016-03-03	27	vosnesenskii or caliginosus !	Website
	513	bee	100	ternarius	Tri-colored bumble bee	Quebec	Canada	2012-06-14	Male	8477	Verified	2014-01-29	30	ternarius !	Website
	514	bee	101	nevadensis	Nevada bumble bee	Colorado	United States	2013-07-24	Not Determined	7330	Verified	2016-03-03	27	nevadensis !	Website
	515	bee	102	vagans	Half-black bumble bee	Wisconsin	United States	2013-09-12	Not Determined	7011	Verified	2016-03-03	27	vagans !	Website
	516	bee	103	griseocollis	Brown-belted bumble bee	Minnesota	United States	2011-07-24	Female	3098	Verified	2014-01-22	27	griseocollis !	Website
	517	bee	104	cryptarum	Cryptic bumble bee	Alberta	Canada	2012-06-16	Female	2856	Verified	2014-11-03	27	cryptarum !	Website
	518	bee	105	impatiens	Common eastern bumble bee	Minnesota	United States	2013-08-10	Female	3098	Verified	2015-08-26	7	impatiens !	Website
	519	bee	106	sp.	Bumble bee	Minnesota	United States	2013-09-09	Not Determined	2046	Verified	2016-03-03	27	sp. !	Website
	520	bee	107	occidentalis	Western bumble bee	Washington	United States	2013-07-07	Male	8436	Verified	2014-01-22	27	occidentalis !	Website
	521	bee	108	occidentalis	Western bumble bee	Washington	United States	2013-07-09	Male	8436	Verified	2014-01-22	27	occidentalis !	Website
	522	bee	109	impatiens	Common eastern bumble bee	Alabama	United States	2013-04-05	Female	3593	Verified	2014-01-22	16	impatiens !	Website
	523	bee	110	ternarius	Tri-colored bumble bee	Minnesota	United States	2013-09-09	Male	2046	Verified	2014-02-02	30	ternarius !	Website
	524	bee	111	huntii	Hunt's bumble bee	Montana	United States	2011-08-31	Not Determined	3214	Verified	2016-03-09	27	huntii !	Website
	525	bee	112	ternarius	Tri-colored bumble bee	Minnesota	United States	2013-09-09	Not Determined	2046	Verified	2016-03-09	27	ternarius !	Website
	526	bee	114	occidentalis	Western bumble bee	Montana	United States	2011-08-31	Female	3214	Verified	2014-01-28	27	occidentalis !	Website
	527	bee	115	rufocinctus	Red-belted bumble bee	Ontario	Canada	2010-08-27	Male	959	Verified	2014-01-29	30	rufocinctus !	Website
	528	bee	116	sp.	Bumble bee	Minnesota	United States	2011-07-31	Not Determined	2046	Verified	2016-03-09	27	sp. !	Website
	529	bee	117	sp.	Bumble bee	Utah	United States	2012-08-03	Female	1696	Verified	2014-04-21	21	sp. !	Website
	530	bee	118	Unknown	Not a bumble bee	Washington	United States	2013-06-29	Male	1877	Invalid	2014-09-08	8	sp.	Website
	531	bee	119	occidentalis	Western bumble bee	Oregon	United States	2013-08-28	Male	6877	Verified	2014-01-28	27	occidentalis !	Website
	532	bee	120	sp.	Bumble bee	Montana	United States	2010-08-30	Male	2046	Verified	2014-10-06	27	sp. !	Website
	533	bee	121	vagans	Half-black bumble bee	Minnesota	United States	2010-07-17	Not Determined	2046	Verified	2016-03-09	27	vagans !	Website
	534	bee	122	nevadensis	Nevada bumble bee	Wyoming	United States	2011-06-28	Not Determined	1564	Verified	2016-03-09	27	nevadensis !	Website
	535	bee	124	rufocinctus	Red-belted bumble bee	British Columbia	Canada	2008-06-22	Not Determined	2232	Verified	2016-03-09	27	rufocinctus !	Website
	536	bee	126	impatiens	Common eastern bumble bee	Connecticut	United States	2012-09-04	Not Determined	1564	Verified	2016-03-09	27	impatiens !	Website
	537	bee	127	sp.	Bumble bee	British Columbia	Canada	2008-08-13	Not Determined	2232	Verified	2016-03-09	27	sp. !	Website
	538	bee	128	occidentalis	Western bumble bee	British Columbia	Canada	2013-04-23	Female	150	Verified	2014-01-22	27	occidentalis !	Website
	539	bee	129	nevadensis	Nevada bumble bee	Wyoming	United States	2013-07-20	Not Determined	1564	Verified	2016-03-09	27	nevadensis !	Website
	540	bee	130	borealis	Northern amber bumble bee	Minnesota	United States	2010-06-07	Not Determined	2046	Verified	2016-03-09	27	borealis !	Website
	541	bee	131	huntii	Hunt's bumble bee	Wyoming	United States	2013-06-18	Male	931	Verified	2014-01-22	27	huntii !	Website
	542	bee	132	sp.	Bumble bee	Wyoming	United States	2013-07-20	Not Determined	1564	Verified	2016-03-09	27	sp. !	Website
	543	bee	133	Unknown	Not a bumble bee	New Jersey	United States	2013-08-11	Male	5469	Invalid	2014-01-29	30	impatiens	Website
	544	bee	134	Unknown	Not a bumble bee	California	United States	2013-11-16	Female	4015	Invalid	2017-12-01	27	melanopygus	Website
	545	bee	135	huntii	Hunt's bumble bee	Wyoming	United States	2013-09-05	Female	1564	Verified	2015-02-05	27	huntii !	Website
	546	bee	136	griseocollis	Brown-belted bumble bee	Minnesota	United States	2010-05-26	Not Determined	2046	Verified	2016-03-09	27	griseocollis !	Website
	547	bee	137	bifarius	Two-form bumble bee	Utah	United States	2009-04-30	Female	3425	Verified	2014-04-21	21	bifarius !	Website
	548	bee	138	terricola	Yellow-banded bumble bee	Pennsylvania	United States	2012-07-13	Female	6019	Verified	2014-02-03	30	terricola !	Website
	549	bee	139	huntii	Hunt's bumble bee	Utah	United States	2009-04-30	Female	3425	Verified	2014-08-14	27	huntii !	Website
	550	bee	140	terricola	Yellow-banded bumble bee	Saskatchewan	Canada	2013-08-15	Male	1712	Verified	2014-01-24	4	terricola	Website
	551	bee	141	sp.	Bumble bee	British Columbia	Canada	2008-07-28	Not Determined	2232	Verified	2016-03-09	27	sp. !	Website
	552	bee	143	impatiens	Common eastern bumble bee	Virginia	United States	2013-10-12	Not Determined	4531	Verified	2016-03-09	27	impatiens !	Website
	553	bee	144	sp.	Bumble bee	British Columbia	Canada	2010-06-16	Female	2232	Verified	2014-11-07	8	sp. !	Website
	554	bee	145	griseocollis	Brown-belted bumble bee	Indiana	United States	2013-08-25	Male	3140	Verified	2014-01-22	27	griseocollis !	Website
	555	bee	146	citrinus	Lemon cuckoo bumble bee	New Jersey	United States	2013-07-07	Not Determined	5469	Verified	2016-03-09	27	citrinus !	Website
	556	bee	147	Unknown	Not a bumble bee	Oregon	United States	2012-05-05	Female	4884	Invalid	2014-08-22	30	impatiens	Website
	557	bee	148	ternarius	Tri-colored bumble bee	Pennsylvania	United States	2012-07-13	Male	6019	Verified	2014-01-22	27	ternarius !	Website
	558	bee	149	Unknown	Not a bumble bee	California	United States	2014-01-22	Male	6976	Invalid	2014-01-22	27	sp.	Website
	559	bee	151	Unknown	Not a bumble bee	Massachusetts	United States	2010-07-21	Male	877	Invalid	2014-09-22	8	sp.	Website
	560	bee	152	ternarius	Tri-colored bumble bee	Pennsylvania	United States	2013-08-11	Male	5736	Verified	2014-02-02	30	ternarius !	Website
	561	bee	153	griseocollis	Brown-belted bumble bee	Pennsylvania	United States	2012-09-12	Not Determined	6019	Verified	2016-03-09	27	griseocollis !	Website
	562	bee	154	impatiens	Common eastern bumble bee	North Carolina	United States	2011-07-22	Not Determined	1824	Verified	2016-03-09	27	impatiens !	Website
	563	bee	155	rufocinctus	Red-belted bumble bee	California	United States	2006-07-28	Not Determined	3431	Verified	2016-03-09	27	rufocinctus !	Website
	564	bee	156	ternarius	Tri-colored bumble bee	New York	United States	2011-10-26	Male	7753	Verified	2014-01-22	27	ternarius !	Website
	565	bee	157	impatiens	Common eastern bumble bee	Pennsylvania	United States	2012-06-23	Not Determined	6019	Verified	2016-03-09	27	impatiens !	Website
	566	bee	158	bimaculatus	Two-spotted bumble bee	North Carolina	United States	2011-06-15	Male	1824	Verified	2014-01-22	16	bimaculatus !	Website
	567	bee	159	vosnesenskii	Yellow-faced bumble bee	California	United States	2013-07-23	Male	4656	Verified	2014-01-22	27	vosnesenskii !	Website
	568	bee	160	ternarius	Tri-colored bumble bee	Wisconsin	United States	2013-09-14	Male	5496	Verified	2014-02-02	30	ternarius !	Website
	569	bee	161	impatiens	Common eastern bumble bee	North Dakota	United States	2012-04-24	Not Determined	4481	Verified	2016-03-09	27	impatiens !	Website
	570	bee	162	huntii	Hunt's bumble bee	Nevada	United States	2007-07-18	Male	3431	Verified	2014-01-22	27	huntii !	Website
	571	bee	163	Unknown	Not a bumble bee	California	United States	2007-06-15	Male	3431	Invalid	2014-01-22	27	sp.	Website
	572	bee	164	vosnesenskii	Yellow-faced bumble bee	British Columbia	Canada	2013-07-14	Female	26	Verified	2016-03-15	27	vosnesenskii !	Website
	573	bee	165	vosnesenskii or caliginosus	Yellow-faced group	Oregon	United States	2014-01-19	Female	5904	Verified	2015-02-10	27	vosnesenskii or caliginosus !	Website
	574	bee	166	griseocollis	Brown-belted bumble bee	Oregon	United States	2013-04-27	Female	6131	Verified	2016-03-15	27	griseocollis !	Website
	575	bee	167	vosnesenskii	Yellow-faced bumble bee	Oregon	United States	2009-07-15	Female	6131	Verified	2016-03-15	27	vosnesenskii !	Website
	576	bee	168	sp.	Bumble bee	Washington	United States	2013-06-05	Male	1767	Verified	2014-01-28	27	sp. !	Website
	577	bee	169	centralis	Central bumble bee	Idaho	United States	2012-06-02	Female	3443	Verified	2016-03-15	27	centralis !	Website
	578	bee	170	pensylvanicus	American bumble bee	California	United States	2012-09-22	Female	6131	Verified	2014-01-28	27	pensylvanicus !	Website
	579	bee	172	vosnesenskii	Yellow-faced bumble bee	Oregon	United States	2011-04-23	Female	6131	Verified	2015-02-10	27	vosnesenskii !	Website
	580	bee	173	vosnesenskii or caliginosus	Yellow-faced group	California	United States	2011-06-17	Female	6131	Verified	2016-03-15	27	vosnesenskii or caliginosus !	Website
	581	bee	174	vosnesenskii	Yellow-faced bumble bee	California	United States	2011-06-13	Female	6131	Verified	2016-03-15	27	vosnesenskii !	Website
	582	bee	175	impatiens	Common eastern bumble bee	New Jersey	United States	2013-06-05	Female	5469	Verified	2016-03-15	27	impatiens !	Website
	583	bee	176	vosnesenskii	Yellow-faced bumble bee	California	United States	2012-07-13	Female	6131	Verified	2016-03-15	27	vosnesenskii !	Website
	584	bee	177	sp.	Bumble bee	New Jersey	United States	2013-09-24	Female	5469	Verified	2016-03-15	27	sp. !	Website
	585	bee	178	occidentalis	Western bumble bee	British Columbia	Canada	2012-06-03	Female	150	Verified	2014-01-28	27	occidentalis !	Website
	586	bee	179	fraternus	Southern plains bumble bee	Florida	United States	2012-07-29	Female	1183	Verified	2016-03-15	27	fraternus !	Website
	587	bee	180	occidentalis	Western bumble bee	British Columbia	Canada	2010-08-07	Male	150	Verified	2014-01-24	4	occidentalis !	Website
	588	bee	181	sp.	Bumble bee	North Carolina	United States	2012-07-25	Female	2737	Verified	2016-03-15	27	sp. !	Website
	589	bee	182	pensylvanicus	American bumble bee	Texas	United States	2013-10-13	Female	872	Verified	2014-01-28	27	pensylvanicus !	Website
	590	bee	184	Unknown	Not a bumble bee	California	United States	2013-03-22	Male	4656	Invalid	2014-01-28	27	sp.	Website
	591	bee	185	impatiens	Common eastern bumble bee	New York	United States	2013-08-17	Female	3669	Verified	2014-01-30	30	impatiens !	Website
	592	bee	187	fraternus	Southern plains bumble bee	Iowa	United States	2010-08-29	Female	7	Verified	2016-03-15	27	fraternus !	Website
	593	bee	188	auricomus	Black and gold bumble bee	Texas	United States	2011-07-06	Female	3823	Verified	2016-03-15	27	auricomus !	Website
	594	bee	191	pensylvanicus	American bumble bee	Iowa	United States	2010-08-29	Female	7	Verified	2016-03-15	27	pensylvanicus !	Website
	595	bee	192	auricomus	Black and gold bumble bee	Texas	United States	2011-07-04	Female	3823	Verified	2016-03-15	27	auricomus !	Website
	596	bee	193	sp.	Bumble bee	California	United States	2013-12-29	Female	4016	Verified	2016-03-15	27	sp. !	Website
	597	bee	194	fervidus	Yellow bumble bee	Iowa	United States	2010-08-07	Female	7	Verified	2016-03-15	27	fervidus !	Website
	598	bee	195	ternarius	Tri-colored bumble bee	Pennsylvania	United States	2013-04-24	Female	4786	Verified	2014-02-02	30	ternarius !	Website
	599	bee	198	griseocollis	Brown-belted bumble bee	Iowa	United States	2010-08-06	Female	7	Verified	2016-03-15	27	griseocollis !	Website
	600	bee	199	impatiens	Common eastern bumble bee	Pennsylvania	United States	2013-05-06	Female	4786	Verified	2016-03-15	27	impatiens !	Website
	601	bee	200	melanopygus	Black-tailed bumble bee	California	United States	2014-01-12	Female	4016	Verified	2016-03-15	27	melanopygus !	Website
	602	bee	201	bimaculatus	Two-spotted bumble bee	Pennsylvania	United States	2013-04-30	Not Determined	4786	Verified	2016-04-17	27	bimaculatus !	Website
	603	bee	202	ternarius	Tri-colored bumble bee	Minnesota	United States	2009-07-26	Female	7	Verified	2014-02-02	30	ternarius !	Website
	604	bee	203	perplexus	Confusing bumble bee	Minnesota	United States	2009-07-26	Male	7	Verified	2016-04-17	27	vagans, sandersoni or perplexus !	Website
	605	bee	204	affinis	Rusty-patched bumble bee	Wisconsin	United States	2013-07-04	Female	7814	Verified	2014-01-28	27	affinis !	Website
	606	bee	205	nevadensis	Nevada bumble bee	Montana	United States	2011-08-10	Not Determined	7	Verified	2016-04-17	27	nevadensis !	Website
	607	bee	206	griseocollis	Brown-belted bumble bee	Washington	United States	2013-08-13	Not Determined	975	Verified	2016-04-17	27	griseocollis !	Website
	608	bee	207	huntii	Hunt's bumble bee	Washington	United States	2013-09-08	Not Determined	975	Verified	2016-04-17	27	huntii !	Website
	609	bee	208	sp.	Bumble bee	Washington	United States	2013-08-22	Not Determined	975	Verified	2016-04-17	27	sp. !	Website
	610	bee	209	impatiens	Common eastern bumble bee	Ontario	Canada	2013-06-30	Not Determined	7396	Verified	2016-04-17	27	impatiens !	Website
	611	bee	210	vagans	Half-black bumble bee	Ontario	Canada	2013-08-02	Not Determined	7396	Verified	2016-03-17	27	vagans !	Website
	612	bee	211	Unknown	Not a bumble bee	Ontario	Canada	2013-09-18	Male	7396	Invalid	2014-09-22	8	sp.	Website
	613	bee	212	impatiens	Common eastern bumble bee	Maine	United States	2013-07-25	Not Determined	2858	Verified	2016-03-17	27	impatiens !	Website
	614	bee	213	impatiens	Common eastern bumble bee	Maine	United States	2013-07-24	Not Determined	2858	Verified	2016-03-17	27	impatiens !	Website
	615	bee	214	griseocollis	Brown-belted bumble bee	Ontario	Canada	2013-08-10	Male	7396	Verified	2014-01-29	30	griseocollis !	Website
	616	bee	215	impatiens	Common eastern bumble bee	Maine	United States	2013-07-24	Not Determined	2858	Verified	2016-03-17	27	impatiens !	Website
	617	bee	216	bimaculatus	Two-spotted bumble bee	Ontario	Canada	2013-07-30	Male	7396	Verified	2014-05-27	24	bimaculatus !	Website
	618	bee	218	Unknown	Not a bumble bee	Massachusetts	United States	2010-09-26	Male	5818	Invalid	2014-09-22	8	sp.	Website
	619	bee	219	sp.	Bumble bee	Maine	United States	2013-07-24	Not Determined	2858	Verified	2016-04-17	27	sp. !	Website
	620	bee	221	sp.	Bumble bee	Pennsylvania	United States	2013-07-24	Not Determined	7820	Verified	2016-03-17	27	sp. !	Website
	621	bee	222	impatiens	Common eastern bumble bee	Delaware	United States	2013-09-30	Not Determined	4286	Verified	2016-03-17	27	impatiens !	Website
	622	bee	223	Unknown	Not a bumble bee	Texas	United States	2013-10-31	Female	3548	Invalid	2016-03-17	27	sp.	Website
	623	bee	224	sp.	Bumble bee	California	United States	2014-01-22	Not Determined	4465	Verified	2016-03-17	27	sp. !	Website
	624	bee	225	morrisoni	Morrison bumble bee	Colorado	United States	2012-07-01	Not Determined	4733	Verified	2016-03-17	27	morrisoni !	Website
	625	bee	226	impatiens	Common eastern bumble bee	Quebec	Canada	2005-05-02	Female	298	Verified	2014-01-29	30	impatiens !	Website
	626	bee	227	borealis	Northern amber bumble bee	Maine	United States	2013-08-20	Not Determined	4257	Verified	2016-03-17	27	borealis !	Website
	627	bee	228	griseocollis	Brown-belted bumble bee	Washington	United States	2014-01-22	Not Determined	6749	Verified	2016-03-17	27	griseocollis !	Website
	628	bee	229	centralis	Central bumble bee	Alberta	Canada	2012-07-10	Not Determined	2856	Verified	2016-03-17	27	centralis !	Website
	629	bee	230	borealis	Northern amber bumble bee	Quebec	Canada	2008-07-07	Not Determined	298	Verified	2016-04-17	27	borealis !	Website
	630	bee	231	fraternus	Southern plains bumble bee	Nebraska	United States	2013-09-23	Not Determined	5725	Verified	2016-04-17	27	fraternus !	Website
	631	bee	232	sp.	Bumble bee	Nebraska	United States	2013-08-31	Not Determined	5725	Verified	2016-04-17	27	sp. !	Website
	632	bee	233	terricola	Yellow-banded bumble bee	Quebec	Canada	2013-07-31	Male	298	Verified	2014-02-03	30	terricola !	Website
	633	bee	234	griseocollis	Brown-belted bumble bee	Nebraska	United States	2013-08-12	Not Determined	5725	Verified	2016-04-17	27	griseocollis !	Website
	634	bee	235	perplexus	Confusing bumble bee	Maine	United States	2011-07-11	Not Determined	6522	Verified	2016-04-17	27	perplexus !	Website
	635	bee	236	perplexus	Confusing bumble bee	Maine	United States	2012-07-09	Not Determined	6522	Verified	2016-04-17	27	perplexus !	Website
	636	bee	237	perplexus	Confusing bumble bee	Maine	United States	2012-07-09	Not Determined	6522	Verified	2016-04-17	27	perplexus !	Website
	637	bee	238	perplexus	Confusing bumble bee	Maine	United States	2012-07-09	Not Determined	6522	Verified	2016-04-17	27	perplexus !	Website
	638	bee	239	perplexus	Confusing bumble bee	Maine	United States	2012-07-09	Not Determined	6522	Verified	2016-04-17	27	perplexus !	Website
	639	bee	240	melanopygus	Black-tailed bumble bee	California	United States	2014-01-22	Not Determined	2993	Verified	2016-04-17	27	melanopygus !	Website
	640	bee	241	perplexus	Confusing bumble bee	Maine	United States	2012-07-09	Not Determined	6522	Verified	2016-04-17	27	perplexus !	Website
	641	bee	242	vagans, sandersoni or perplexus	Two-yellow striped group	Maine	United States	2012-07-09	Not Determined	6522	Verified	2016-04-17	27	vagans, sandersoni or perplexus !	Website
	642	bee	243	ternarius	Tri-colored bumble bee	Ontario	Canada	2013-07-24	Male	1972	Verified	2014-01-29	30	ternarius !	Website
	643	bee	244	perplexus	Confusing bumble bee	Maine	United States	2011-07-16	Not Determined	6522	Verified	2016-04-17	27	perplexus !	Website
	644	bee	245	perplexus	Confusing bumble bee	Maine	United States	2011-07-16	Not Determined	6522	Verified	2016-04-17	27	perplexus !	Website
	645	bee	246	perplexus	Confusing bumble bee	Maine	United States	2011-07-16	Not Determined	6522	Verified	2016-04-17	27	perplexus !	Website
	646	bee	247	borealis	Northern amber bumble bee	Ontario	Canada	2013-08-14	Male	1972	Verified	2014-04-16	30	borealis !	Website
	647	bee	248	vagans, sandersoni or perplexus	Two-yellow striped group	Maine	United States	2011-07-16	Not Determined	6522	Verified	2016-04-17	27	vagans, sandersoni or perplexus !	Website
	648	bee	249	perplexus	Confusing bumble bee	Maine	United States	2011-07-18	Not Determined	6522	Verified	2016-04-17	27	perplexus !	Website
	649	bee	250	impatiens	Common eastern bumble bee	Ontario	Canada	2013-09-16	Female	1972	Verified	2014-01-29	30	impatiens !	Website
	650	bee	251	borealis	Northern amber bumble bee	Minnesota	United States	2013-07-30	Not Determined	7300	Verified	2016-04-17	27	borealis !	Website
	651	bee	252	Unknown	Not a bumble bee	Ontario	Canada	2013-09-17	Male	1972	Invalid	2014-01-29	30	fervidus	Website
	652	bee	253	griseocollis	Brown-belted bumble bee	Minnesota	United States	2013-07-30	Not Determined	7300	Verified	2016-04-17	27	griseocollis !	Website
	653	bee	254	impatiens	Common eastern bumble bee	Minnesota	United States	2013-07-30	Female	7300	Verified	2015-08-30	7	impatiens !	Website
	654	bee	255	impatiens	Common eastern bumble bee	Ontario	Canada	2013-09-17	Male	1972	Verified	2014-01-29	30	impatiens !	Website
	655	bee	256	impatiens	Common eastern bumble bee	Ontario	Canada	2013-09-17	Not Determined	1972	Verified	2016-04-17	27	impatiens !	Website
	656	bee	258	impatiens	Common eastern bumble bee	Ontario	Canada	2013-09-23	Female	1972	Verified	2014-01-29	30	impatiens !	Website
	657	bee	259	sp.	Bumble bee	Massachusetts	United States	2010-04-13	Not Determined	5818	Verified	2016-04-17	27	sp. !	Website
	658	bee	261	griseocollis	Brown-belted bumble bee	Georgia	United States	2013-06-23	Not Determined	2546	Verified	2016-04-17	27	griseocollis !	Website
	659	bee	262	vagans	Half-black bumble bee	Minnesota	United States	2013-07-15	Not Determined	7300	Verified	2016-04-17	27	vagans !	Website
	660	bee	263	pensylvanicus	American bumble bee	New Mexico	United States	2012-08-21	Female	7016	Verified	2015-05-08	27	pensylvanicus !	Website
	661	bee	264	griseocollis	Brown-belted bumble bee	Georgia	United States	2013-06-23	Not Determined	2546	Verified	2016-04-17	27	griseocollis !	Website
	662	bee	265	ternarius	Tri-colored bumble bee	Michigan	United States	2013-07-22	Female	7300	Verified	2016-01-08	14	ternarius !	Website
	663	bee	266	griseocollis	Brown-belted bumble bee	Oregon	United States	2013-09-23	Not Determined	6029	Verified	2016-04-17	27	griseocollis !	Website
	664	bee	267	auricomus	Black and gold bumble bee	Minnesota	United States	2012-06-17	Not Determined	7300	Verified	2016-04-17	27	auricomus !	Website
	665	bee	270	sp.	Bumble bee	Idaho	United States	2011-06-21	Not Determined	6098	Verified	2016-04-17	27	sp. !	Website
	666	bee	272	occidentalis	Western bumble bee	Wyoming	United States	2012-07-19	Male	6850	Verified	2014-01-28	29	occidentalis !	Website
	667	bee	274	vosnesenskii	Yellow-faced bumble bee	Oregon	United States	2010-06-17	Not Determined	1127	Verified	2016-04-17	27	vosnesenskii !	Website
	668	bee	275	vosnesenskii	Yellow-faced bumble bee	Oregon	United States	2011-07-24	Female	1127	Verified	2014-01-28	27	vosnesenskii !	Website
	669	bee	277	impatiens	Common eastern bumble bee	Ohio	United States	2013-08-07	Female	3371	Verified	2016-02-21	14	impatiens !	Website
	670	bee	279	vagans	Half-black bumble bee	Ohio	United States	2013-07-21	Not Determined	3371	Verified	2016-04-17	27	vagans !	Website
	671	bee	281	ternarius	Tri-colored bumble bee	Massachusetts	United States	2013-09-20	Female	5709	Verified	2014-02-02	30	ternarius !	Website
	672	bee	282	pensylvanicus	American bumble bee	Texas	United States	2013-11-02	Not Determined	1161	Verified	2015-05-18	27	pensylvanicus !	Website
	673	bee	283	auricomus	Black and gold bumble bee	Minnesota	United States	2012-05-14	Female	3647	Verified	2014-05-12	27	auricomus !	Website
	674	bee	286	sp.	Bumble bee	Idaho	United States	2010-07-21	Not Determined	6098	Verified	2016-04-17	27	sp. !	Website
	675	bee	288	appositus	White-shouldered bumble bee	Idaho	United States	2013-09-11	Female	6098	Verified	2014-01-28	27	appositus !	Website
	676	bee	289	melanopygus	Black-tailed bumble bee	Oregon	United States	2013-03-04	Female	4008	Verified	2014-10-06	8	melanopygus !	Website
	677	bee	290	appositus	White-shouldered bumble bee	Idaho	United States	2013-09-11	Female	6098	Verified	2014-01-28	27	appositus !	Website
	678	bee	292	griseocollis	Brown-belted bumble bee	Washington	United States	2012-05-28	Not Determined	3144	Verified	2015-05-18	27	griseocollis !	Website
	679	bee	293	occidentalis	Western bumble bee	Saskatchewan	Canada	2013-08-21	Male	1712	Verified	2014-01-24	4	occidentalis !	Website
	680	bee	294	griseocollis	Brown-belted bumble bee	Washington	United States	2011-05-28	Not Determined	3144	Verified	2015-05-18	27	griseocollis !	Website
	681	bee	295	griseocollis	Brown-belted bumble bee	Washington	United States	2012-09-27	Not Determined	3144	Verified	2015-05-18	27	griseocollis !	Website
	682	bee	296	griseocollis	Brown-belted bumble bee	Washington	United States	2012-09-27	Not Determined	3144	Verified	2015-05-18	27	griseocollis !	Website
	683	bee	297	bifarius	Two-form bumble bee	Oregon	United States	2013-06-25	Female	3144	Verified	2015-02-27	27	bifarius !	Website
	684	bee	298	impatiens	Common eastern bumble bee	Iowa	United States	2007-08-20	Not Determined	7359	Verified	2016-04-17	27	impatiens !	Website
	685	bee	299	vosnesenskii	Yellow-faced bumble bee	Oregon	United States	2013-03-28	Female	4008	Verified	2015-02-10	27	vosnesenskii !	Website
	686	bee	300	bifarius	Two-form bumble bee	Washington	United States	2013-07-10	Male	3534	Verified	2015-03-26	27	bifarius !	Website
	687	bee	301	terricola	Yellow-banded bumble bee	Maine	United States	2012-07-13	Not Determined	6522	Verified	2016-04-17	27	terricola !	Website
	688	bee	302	melanopygus	Black-tailed bumble bee	Oregon	United States	2013-04-29	Female	4008	Verified	2014-10-06	8	melanopygus !	Website
	689	bee	303	terricola	Yellow-banded bumble bee	Maine	United States	2012-07-13	Not Determined	6522	Verified	2016-04-17	27	terricola !	Website
	690	bee	304	terricola	Yellow-banded bumble bee	Maine	United States	2011-07-18	Not Determined	6522	Verified	2016-04-17	27	terricola !	Website
	691	bee	305	vosnesenskii	Yellow-faced bumble bee	Washington	United States	2013-08-16	Not Determined	3534	Verified	2016-04-17	27	vosnesenskii !	Website
	692	bee	306	sp.	Bumble bee	Maine	United States	2012-07-13	Not Determined	6522	Verified	2016-04-17	27	sp. !	Website
	693	bee	307	terricola	Yellow-banded bumble bee	Maine	United States	2012-07-13	Female	6522	Verified	2014-02-03	30	terricola !	Website
	694	bee	309	flavifrons	Yellow head bumble bee	Oregon	United States	2013-04-29	Not Determined	4008	Verified	2016-04-17	27	flavifrons !	Website
	695	bee	310	terricola	Yellow-banded bumble bee	Maine	United States	2012-07-13	Male	6522	Verified	2014-02-03	30	terricola !	Website
	696	bee	311	mixtus	Fuzzy-horned bumble bee	Oregon	United States	2013-04-29	Not Determined	4008	Verified	2016-04-17	27	mixtus !	Website
	697	bee	312	terricola	Yellow-banded bumble bee	Maine	United States	2011-07-17	Female	6522	Verified	2014-02-03	30	terricola !	Website
	698	bee	313	terricola	Yellow-banded bumble bee	Maine	United States	2011-07-17	Not Determined	6522	Verified	2016-04-17	27	terricola !	Website
	699	bee	314	terricola	Yellow-banded bumble bee	Maine	United States	2012-07-13	Female	6522	Verified	2014-01-28	27	terricola !	Website
	700	bee	315	flavifrons	Yellow head bumble bee	Oregon	United States	2013-04-30	Not Determined	4008	Verified	2016-04-17	27	flavifrons !	Website
	701	bee	316	sp.	Bumble bee	California	United States	2011-04-04	Not Determined	2192	Verified	2016-04-17	27	sp. !	Website
	702	bee	317	bifarius	Two-form bumble bee	California	United States	2012-02-22	Female	2192	Verified	2014-01-28	27	bifarius !	Website
	703	bee	318	sp.	Bumble bee	California	United States	2013-07-30	Female	2192	Verified	2015-02-27	27	sp. !	Website
	704	bee	319	auricomus	Black and gold bumble bee	Iowa	United States	2013-09-02	Not Determined	4628	Verified	2016-04-17	27	auricomus !	Website
	705	bee	320	fervidus	Yellow bumble bee	Oregon	United States	2013-05-05	Female	4008	Verified	2014-01-28	27	fervidus !	Website
	706	bee	321	impatiens	Common eastern bumble bee	Iowa	United States	2013-10-10	Not Determined	4628	Verified	2016-04-17	27	impatiens !	Website
	707	bee	322	impatiens	Common eastern bumble bee	Iowa	United States	2012-06-30	Not Determined	4628	Verified	2016-04-17	27	impatiens !	Website
	708	bee	323	griseocollis	Brown-belted bumble bee	Washington	United States	2013-05-17	Not Determined	3570	Verified	2016-04-17	27	griseocollis !	Website
	709	bee	324	flavifrons	Yellow head bumble bee	Oregon	United States	2013-05-07	Not Determined	4008	Verified	2016-04-17	27	flavifrons !	Website
	710	bee	325	melanopygus	Black-tailed bumble bee	Oregon	United States	2013-05-14	Female	4008	Verified	2014-01-28	27	melanopygus !	Website
	711	bee	326	impatiens	Common eastern bumble bee	Pennsylvania	United States	2013-05-17	Not Determined	4786	Verified	2016-04-17	27	impatiens !	Website
	712	bee	327	ternarius	Tri-colored bumble bee	Pennsylvania	United States	2013-07-20	Not Determined	4786	Verified	2016-04-17	27	ternarius !	Website
	713	bee	328	impatiens	Common eastern bumble bee	Pennsylvania	United States	2013-11-06	Not Determined	4786	Verified	2016-04-17	27	impatiens !	Website
	714	bee	329	impatiens	Common eastern bumble bee	Pennsylvania	United States	2013-07-29	Not Determined	4786	Verified	2016-04-17	27	impatiens !	Website
	715	bee	330	flavifrons	Yellow head bumble bee	Oregon	United States	2013-05-20	Not Determined	4008	Verified	2016-04-17	27	flavifrons !	Website
	716	bee	331	flavifrons	Yellow head bumble bee	Oregon	United States	2013-05-20	Not Determined	4008	Verified	2016-04-17	27	flavifrons !	Website
	717	bee	332	sp.	Bumble bee	California	United States	2014-01-25	Not Determined	4016	Verified	2016-04-17	27	sp. !	Website
	718	bee	333	vosnesenskii	Yellow-faced bumble bee	California	United States	2014-01-25	Female	4016	Verified	2015-02-26	27	vosnesenskii !	Website
	719	bee	334	mixtus	Fuzzy-horned bumble bee	Oregon	United States	2013-05-20	Female	4008	Verified	2014-01-28	27	mixtus !	Website
	720	bee	335	melanopygus	Black-tailed bumble bee	Oregon	United States	2013-05-26	Female	4008	Verified	2014-10-06	8	melanopygus !	Website
	721	bee	336	flavifrons	Yellow head bumble bee	Oregon	United States	2013-06-27	Not Determined	4008	Verified	2016-04-17	27	flavifrons !	Website
	722	bee	337	sp.	Bumble bee	Oregon	United States	2013-07-01	Not Determined	4008	Verified	2016-04-17	27	sp. !	Website
	723	bee	340	morrisoni	Morrison bumble bee	Nevada	United States	2013-07-13	Female	7916	Verified	2014-01-28	27	morrisoni !	Website
	724	bee	341	vosnesenskii	Yellow-faced bumble bee	Oregon	United States	2013-07-05	Not Determined	4008	Verified	2015-02-10	27	vosnesenskii !	Website
	725	bee	342	vosnesenskii	Yellow-faced bumble bee	Oregon	United States	2013-08-02	Male	4008	Verified	2015-02-09	27	vosnesenskii !	Website
	726	bee	343	vosnesenskii	Yellow-faced bumble bee	Oregon	United States	2013-08-06	Male	4008	Verified	2015-02-09	27	vosnesenskii !	Website
	727	bee	344	sp.	Bumble bee	California	United States	2012-03-24	Not Determined	6131	Verified	2016-04-17	27	sp. !	Website
	728	bee	345	nevadensis	Nevada bumble bee	Washington	United States	2012-06-03	Female	3570	Verified	2014-01-28	27	nevadensis !	Website
	729	bee	346	griseocollis	Brown-belted bumble bee	New York	United States	2013-08-16	Male	5672	Verified	2014-01-29	30	griseocollis !	Website
	730	bee	347	impatiens	Common eastern bumble bee	Ontario	Canada	2013-08-14	Not Determined	8251	Verified	2016-04-17	27	impatiens !	Website
	731	bee	348	nevadensis	Nevada bumble bee	Washington	United States	2011-08-29	Not Determined	6261	Verified	2016-04-17	27	nevadensis !	Website
	732	bee	349	fervidus	Yellow bumble bee	Michigan	United States	2013-08-13	Female	4708	Verified	2016-01-08	14	fervidus !	Website
	733	bee	350	griseocollis	Brown-belted bumble bee	Michigan	United States	2013-06-05	Not Determined	4708	Verified	2016-04-17	27	griseocollis !	Website
	734	bee	352	mixtus	Fuzzy-horned bumble bee	Washington	United States	2013-06-25	Not Determined	931	Verified	2016-04-17	27	mixtus !	Website
	735	bee	353	griseocollis	Brown-belted bumble bee	Iowa	United States	2010-08-29	Female	4628	Verified	2014-01-28	27	griseocollis !	Website
	736	bee	357	bimaculatus	Two-spotted bumble bee	Maine	United States	2012-07-13	Not Determined	6522	Verified	2016-04-17	27	bimaculatus !	Website
	737	bee	358	sp.	Bumble bee	Alaska	United States	2013-07-25	Not Determined	2294	Verified	2016-04-17	27	sp. !	Website
	738	bee	359	griseocollis	Brown-belted bumble bee	Pennsylvania	United States	2013-07-25	Not Determined	7702	Verified	2016-04-17	27	griseocollis !	Website
	739	bee	360	bimaculatus	Two-spotted bumble bee	Maine	United States	2012-07-13	Not Determined	6522	Verified	2016-04-17	27	bimaculatus !	Website
	740	bee	361	bimaculatus	Two-spotted bumble bee	Maine	United States	2012-07-12	Not Determined	6522	Verified	2016-04-17	27	bimaculatus !	Website
	741	bee	362	bimaculatus	Two-spotted bumble bee	Maine	United States	2012-06-09	Not Determined	6522	Verified	2016-04-17	27	bimaculatus !	Website
	742	bee	363	bimaculatus	Two-spotted bumble bee	Maine	United States	2012-06-08	Female	6522	Verified	2014-01-28	27	bimaculatus !	Website
	743	bee	364	griseocollis	Brown-belted bumble bee	Ontario	Canada	2013-08-01	Female	1641	Verified	2014-01-29	30	griseocollis !	Website
	744	bee	365	bimaculatus	Two-spotted bumble bee	Maine	United States	2010-07-23	Not Determined	6522	Verified	2016-04-17	27	bimaculatus !	Website
	745	bee	366	bimaculatus	Two-spotted bumble bee	Maine	United States	2010-07-23	Not Determined	6522	Verified	2016-04-17	27	bimaculatus !	Website
	746	bee	367	bimaculatus	Two-spotted bumble bee	Ontario	Canada	2012-06-16	Female	1641	Verified	2014-02-03	30	bimaculatus !	Website
	747	bee	368	bimaculatus	Two-spotted bumble bee	Maine	United States	2009-05-12	Female	6522	Verified	2014-01-28	27	bimaculatus !	Website
	748	bee	369	vagans, sandersoni or perplexus	Two-yellow striped group	Ontario	Canada	2012-09-01	Not Determined	1641	Verified	2016-04-17	27	vagans, sandersoni or perplexus !	Website
	749	bee	370	bimaculatus	Two-spotted bumble bee	Maine	United States	2008-06-18	Female	6522	Verified	2014-01-28	27	bimaculatus !	Website
	750	bee	371	bimaculatus	Two-spotted bumble bee	Maine	United States	2007-08-01	Female	6522	Verified	2014-02-03	30	bimaculatus !	Website
	751	bee	372	bimaculatus	Two-spotted bumble bee	Maine	United States	2012-07-13	Female	6522	Verified	2014-01-29	30	bimaculatus !	Website
	752	bee	374	sp.	Bumble bee	Texas	United States	2009-05-14	Male	6975	Verified	2014-01-28	27	sp. !	Website
	753	bee	375	rufocinctus	Red-belted bumble bee	Maine	United States	2013-07-12	Female	6522	Verified	2014-01-28	27	rufocinctus !	Website
	754	bee	376	rufocinctus	Red-belted bumble bee	Maine	United States	2013-07-12	Not Determined	6522	Verified	2016-04-17	27	rufocinctus !	Website
	755	bee	377	rufocinctus	Red-belted bumble bee	Maine	United States	2013-07-12	Not Determined	6522	Verified	2016-04-17	27	rufocinctus !	Website
	756	bee	378	rufocinctus	Red-belted bumble bee	Maine	United States	2013-07-12	Female	6522	Verified	2014-01-28	27	rufocinctus !	Website
	757	bee	380	rufocinctus	Red-belted bumble bee	Washington	United States	2012-06-07	Not Determined	3570	Verified	2016-04-17	27	rufocinctus !	Website
	758	bee	381	fervidus	Yellow bumble bee	Quebec	Canada	2007-04-25	Female	298	Verified	2014-01-28	27	fervidus !	Website
	759	bee	382	griseocollis	Brown-belted bumble bee	Quebec	Canada	2006-08-16	Male	298	Verified	2014-01-28	27	griseocollis !	Website
	760	bee	383	ternarius	Tri-colored bumble bee	Quebec	Canada	2007-04-28	Female	298	Verified	2014-01-28	27	ternarius !	Website
	761	bee	384	impatiens	Common eastern bumble bee	Quebec	Canada	2003-08-19	Female	298	Verified	2014-01-28	27	impatiens !	Website
	762	bee	385	griseocollis	Brown-belted bumble bee	Maine	United States	2008-08-02	Male	6522	Verified	2014-01-29	30	griseocollis !	Website
	763	bee	386	griseocollis	Brown-belted bumble bee	Maine	United States	2009-05-13	Female	6522	Verified	2014-01-29	30	griseocollis !	Website
	764	bee	387	griseocollis	Brown-belted bumble bee	Maine	United States	2009-05-13	Not Determined	6522	Verified	2016-04-19	27	griseocollis !	Website
	765	bee	388	bimaculatus	Two-spotted bumble bee	Maine	United States	2012-05-19	Female	6522	Verified	2014-01-29	30	bimaculatus !	Website
	766	bee	389	griseocollis	Brown-belted bumble bee	Maine	United States	2012-07-26	Male	6522	Verified	2014-01-29	30	griseocollis !	Website
	767	bee	390	griseocollis	Brown-belted bumble bee	Maine	United States	2013-07-09	Male	6522	Verified	2014-01-29	30	griseocollis !	Website
	768	bee	391	griseocollis	Brown-belted bumble bee	Maine	United States	2013-07-11	Male	6522	Verified	2014-01-29	30	griseocollis !	Website
	769	bee	392	perplexus	Confusing bumble bee	Maine	United States	2011-07-18	Male	6522	Verified	2014-01-29	30	perplexus !	Website
	770	bee	393	sp.	Bumble bee	Quebec	Canada	2003-08-30	Not Determined	298	Verified	2016-04-19	27	sp. !	Website
	771	bee	394	griseocollis	Brown-belted bumble bee	Quebec	Canada	2013-07-25	Female	298	Verified	2014-01-29	30	griseocollis !	Website
	772	bee	395	terricola	Yellow-banded bumble bee	Wisconsin	United States	2012-07-18	Female	6877	Verified	2014-01-28	27	terricola !	Website
	773	bee	396	impatiens	Common eastern bumble bee	Ontario	Canada	2013-10-05	Not Determined	4212	Verified	2016-04-19	27	impatiens !	Website
	774	bee	397	borealis	Northern amber bumble bee	Maine	United States	2012-07-13	Female	6522	Verified	2014-01-29	27	borealis !	Website
	775	bee	398	borealis	Northern amber bumble bee	Maine	United States	2012-07-13	Female	6522	Verified	2014-01-29	27	borealis !	Website
	776	bee	400	impatiens	Common eastern bumble bee	Ontario	Canada	2013-10-03	Male	4212	Verified	2014-01-29	27	impatiens !	Website
	777	bee	401	mixtus	Fuzzy-horned bumble bee	Washington	United States	2012-09-11	Female	4675	Verified	2014-01-29	27	mixtus !	Website
	778	bee	402	sp.	Bumble bee	California	United States	2011-09-04	Female	3872	Verified	2014-01-29	27	sp. !	Website
	779	bee	403	melanopygus	Black-tailed bumble bee	Washington	United States	2012-03-24	Female	4675	Verified	2014-01-29	27	melanopygus !	Website
	780	bee	404	borealis	Northern amber bumble bee	Maine	United States	2012-07-12	Female	6522	Verified	2014-01-29	27	borealis !	Website
	781	bee	405	borealis	Northern amber bumble bee	Maine	United States	2012-07-12	Female	6522	Verified	2014-01-29	27	borealis !	Website
	782	bee	406	borealis	Northern amber bumble bee	Maine	United States	2012-07-12	Female	6522	Verified	2014-01-29	27	borealis !	Website
	783	bee	407	borealis	Northern amber bumble bee	Maine	United States	2012-07-12	Female	6522	Verified	2014-01-29	27	borealis !	Website
	784	bee	408	huntii	Hunt's bumble bee	Montana	United States	2013-07-04	Not Determined	5596	Verified	2016-04-19	27	huntii !	Website
	785	bee	409	bifarius	Two-form bumble bee	Montana	United States	2013-07-25	Female	5596	Verified	2015-03-26	27	bifarius !	Website
	786	bee	410	vagans	Half-black bumble bee	Montana	United States	2013-07-04	Not Determined	5596	Verified	2016-04-19	27	vagans !	Website
	787	bee	411	terricola	Yellow-banded bumble bee	Ontario	Canada	2013-09-26	Female	7249	Verified	2014-01-29	30	terricola !	Website
	788	bee	412	terricola	Yellow-banded bumble bee	Ontario	Canada	2013-07-25	Female	7249	Verified	2014-01-29	30	terricola !	Website
	789	bee	413	rufocinctus	Red-belted bumble bee	Ontario	Canada	2013-07-29	Not Determined	7249	Verified	2016-04-19	27	rufocinctus !	Website
	790	bee	414	rufocinctus	Red-belted bumble bee	Ontario	Canada	2013-07-25	Not Determined	7249	Verified	2016-04-19	27	rufocinctus !	Website
	791	bee	415	sp.	Bumble bee	West Virginia	United States	2013-10-20	Male	5687	Verified	2014-01-29	30	sp. !	Website
	792	bee	416	bimaculatus	Two-spotted bumble bee	Ontario	Canada	2013-08-03	Male	7249	Verified	2014-01-29	30	bimaculatus !	Website
	793	bee	417	ternarius	Tri-colored bumble bee	Ontario	Canada	2013-08-10	Female	7249	Verified	2014-05-27	24	ternarius !	Website
	794	bee	418	impatiens	Common eastern bumble bee	Ontario	Canada	2013-09-26	Male	4212	Verified	2014-02-25	30	impatiens !	Website
	795	bee	419	sp.	Bumble bee	Washington	United States	2013-08-08	Male	127	Verified	2014-01-30	27	sp. !	Website
	796	bee	420	sp.	Bumble bee	Kentucky	United States	2013-08-12	Not Determined	2569	Verified	2016-04-19	27	sp. !	Website
	797	bee	421	sp.	Bumble bee	Kentucky	United States	2013-08-12	Not Determined	2569	Verified	2016-04-19	27	sp. !	Website
	798	bee	422	perplexus	Confusing bumble bee	Nova Scotia	Canada	2012-08-11	Not Determined	2404	Verified	2016-04-19	27	perplexus !	Website
	799	bee	423	impatiens	Common eastern bumble bee	Maine	United States	2007-07-31	Not Determined	6522	Verified	2016-04-19	27	impatiens !	Website
	800	bee	424	impatiens	Common eastern bumble bee	Maine	United States	2009-10-02	Not Determined	6522	Verified	2016-04-19	27	impatiens !	Website
	801	bee	426	impatiens	Common eastern bumble bee	Maine	United States	2010-07-23	Not Determined	6522	Verified	2016-04-19	27	impatiens !	Website
	802	bee	427	griseocollis	Brown-belted bumble bee	California	United States	2012-05-09	Female	7548	Verified	2014-02-03	30	griseocollis !	Website
	803	bee	428	impatiens	Common eastern bumble bee	Maine	United States	2010-09-16	Not Determined	6522	Verified	2016-04-19	27	impatiens !	Website
	804	bee	429	Unknown	Not a bumble bee	California	United States	2012-05-09	Female	7548	Invalid	2016-04-19	27	sp.	Website
	805	bee	430	impatiens	Common eastern bumble bee	Maine	United States	2010-06-16	Female	6522	Verified	2014-01-30	30	impatiens !	Website
	806	bee	431	sp.	Bumble bee	California	United States	2012-05-09	Not Determined	7548	Verified	2016-04-19	27	sp. !	Website
	807	bee	432	griseocollis	Brown-belted bumble bee	Maine	United States	2012-07-12	Not Determined	6522	Verified	2016-04-19	27	griseocollis !	Website
	808	bee	433	fervidus	Yellow bumble bee	California	United States	2012-05-09	Not Determined	7548	Verified	2016-04-19	27	fervidus !	Website
	809	bee	434	impatiens	Common eastern bumble bee	Maine	United States	2013-07-13	Not Determined	6522	Verified	2016-04-19	27	impatiens !	Website
	810	bee	435	flavifrons	Yellow head bumble bee	Idaho	United States	2013-09-27	Not Determined	1226	Verified	2016-04-19	27	flavifrons !	Website
	811	bee	436	fervidus	Yellow bumble bee	Oregon	United States	2012-05-15	Female	8191	Verified	2014-07-16	27	fervidus !	Website
	812	bee	437	bimaculatus	Two-spotted bumble bee	Pennsylvania	United States	2013-06-20	Female	7702	Verified	2016-04-29	27	bimaculatus !	Website
	813	bee	438	impatiens	Common eastern bumble bee	Ontario	Canada	2013-10-03	Female	4212	Verified	2016-04-29	27	impatiens !	Website
	814	bee	439	cryptarum	Cryptic bumble bee	Yukon	Canada	2011-07-09	Female	7924	Verified	2017-11-23	34	cryptarum	Website
	815	bee	440	ternarius	Tri-colored bumble bee	Maine	United States	2010-08-07	Female	6522	Verified	2016-04-29	27	ternarius !	Website
	816	bee	441	ternarius	Tri-colored bumble bee	Maine	United States	2010-09-16	Female	6522	Verified	2016-04-29	27	ternarius !	Website
	817	bee	442	ternarius	Tri-colored bumble bee	Maine	United States	2010-08-27	Male	6522	Verified	2016-04-29	27	ternarius !	Website
	818	bee	443	ternarius	Tri-colored bumble bee	Maine	United States	2013-07-09	Female	6522	Verified	2016-04-29	27	ternarius !	Website
	819	bee	444	sp.	Bumble bee	California	United States	2013-07-16	Female	1496	Verified	2014-02-03	27	sp. !	Website
	820	bee	445	ternarius	Tri-colored bumble bee	Maine	United States	2013-08-12	Female	6522	Verified	2016-04-29	27	ternarius !	Website
	821	bee	446	Unknown	Not a bumble bee	Kansas	United States	2012-09-22	Female	824	Invalid	2016-04-29	27	sp.	Website
	822	bee	447	fervidus	Yellow bumble bee	Kansas	United States	2013-09-21	Not Determined	824	Verified	2016-04-29	27	fervidus !	Website
	823	bee	448	Unknown	Not a bumble bee	Kansas	United States	2013-09-21	Female	824	Invalid	2014-02-03	27	sp.	Website
	824	bee	449	huntii	Hunt's bumble bee	Oregon	United States	2012-06-17	Female	7342	Verified	2015-02-05	27	huntii !	Website
	825	bee	450	vagans	Half-black bumble bee	Maine	United States	2013-08-27	Female	6522	Verified	2014-02-04	30	vagans !	Website
	826	bee	451	vagans	Half-black bumble bee	Maine	United States	2012-07-09	Female	6522	Verified	2016-04-29	27	vagans !	Website
	827	bee	452	vagans	Half-black bumble bee	Maine	United States	2012-07-09	Female	6522	Verified	2016-04-29	27	vagans !	Website
	828	bee	453	vagans, sandersoni or perplexus	Two-yellow striped group	Maine	United States	2009-05-10	Female	6522	Verified	2016-04-29	27	vagans, sandersoni or perplexus !	Website
	829	bee	454	vagans	Half-black bumble bee	Maine	United States	2008-08-02	Male	6522	Verified	2014-02-03	27	vagans !	Website
	830	bee	455	vagans	Half-black bumble bee	Maine	United States	2012-07-12	Female	6522	Verified	2014-02-03	27	vagans !	Website
	831	bee	456	auricomus	Black and gold bumble bee	Indiana	United States	2013-07-06	Female	4182	Verified	2014-02-03	27	auricomus !	Website
	832	bee	457	impatiens	Common eastern bumble bee	Ontario	Canada	2013-10-03	Male	4212	Verified	2014-02-25	30	impatiens !	Website
	833	bee	458	Unknown	Not a bumble bee	Maine	United States	2013-07-09	Male	5100	Invalid	2014-02-03	27	sp.	Website
	834	bee	459	impatiens	Common eastern bumble bee	Pennsylvania	United States	2013-08-19	Female	4786	Verified	2014-02-02	30	impatiens !	Website
	835	bee	461	vosnesenskii	Yellow-faced bumble bee	California	United States	2014-02-01	Female	4016	Verified	2014-02-03	27	vosnesenskii !	Website
	836	bee	462	impatiens	Common eastern bumble bee	Pennsylvania	United States	2013-08-21	Female	4786	Verified	2014-02-02	30	impatiens !	Website
	837	bee	463	impatiens	Common eastern bumble bee	Pennsylvania	United States	2013-05-25	Female	4786	Verified	2014-02-03	27	impatiens !	Website
	838	bee	464	bimaculatus	Two-spotted bumble bee	Pennsylvania	United States	2012-04-25	Female	4786	Verified	2014-02-03	27	bimaculatus	Website
	839	bee	465	bimaculatus	Two-spotted bumble bee	Pennsylvania	United States	2012-04-16	Female	4786	Verified	2014-02-03	27	bimaculatus !	Website
	840	bee	466	sp.	Bumble bee	Pennsylvania	United States	2011-10-07	Male	4786	Verified	2014-02-03	27	sp. !	Website
	841	bee	467	ternarius	Tri-colored bumble bee	Pennsylvania	United States	2013-08-21	Female	4786	Verified	2014-02-02	30	ternarius !	Website
	842	bee	468	ternarius	Tri-colored bumble bee	Nova Scotia	Canada	2013-07-06	Female	1956	Verified	2016-04-29	27	ternarius !	Website
	843	bee	469	centralis	Central bumble bee	Alberta	Canada	2012-07-24	Male	2856	Verified	2014-02-03	27	centralis !	Website
	844	bee	470	sp.	Bumble bee	Maine	United States	2010-07-28	Female	1484	Verified	2014-02-03	27	sp. !	Website
	845	bee	471	Unknown	Not a bumble bee	Maine	United States	2010-07-05	Female	1484	Invalid	2014-02-03	27	sp.	Website
	846	bee	473	perplexus	Confusing bumble bee	Alberta	Canada	2012-07-29	Female	2856	Verified	2014-02-03	27	perplexus !	Website
	847	bee	474	perplexus	Confusing bumble bee	Alberta	Canada	2012-07-18	Female	2856	Verified	2014-02-03	27	perplexus !	Website
	848	bee	475	perplexus	Confusing bumble bee	Alberta	Canada	2012-07-11	Not Determined	2856	Verified	2016-04-29	27	perplexus !	Website
	849	bee	476	perplexus	Confusing bumble bee	Alberta	Canada	2012-07-23	Male	2856	Verified	2014-02-03	27	perplexus !	Website
	850	bee	477	griseocollis	Brown-belted bumble bee	Maine	United States	2011-08-01	Female	1484	Verified	2016-04-29	27	griseocollis !	Website
	851	bee	478	sylvicola	Forest bumble bee	Washington	United States	2013-07-28	Male	3570	Verified	2014-02-03	27	sylvicola !	Website
	852	bee	479	melanopygus	Black-tailed bumble bee	California	United States	2014-02-02	Female	5622	Verified	2016-04-29	27	melanopygus !	Website
	853	bee	480	sp.	Bumble bee	Oklahoma	United States	2013-10-01	Male	7163	Verified	2014-07-17	27	sp. !	Website
	854	bee	481	melanopygus	Black-tailed bumble bee	California	United States	2013-12-15	Female	1325	Verified	2016-04-29	27	melanopygus !	Website
	855	bee	482	vosnesenskii	Yellow-faced bumble bee	Washington	United States	2013-08-08	Female	4675	Verified	2016-04-29	27	vosnesenskii !	Website
	856	bee	483	pensylvanicus	American bumble bee	Oklahoma	United States	2011-10-17	Female	7163	Verified	2016-04-29	27	pensylvanicus !	Website
	857	bee	485	griseocollis	Brown-belted bumble bee	Oklahoma	United States	2011-10-17	Female	7163	Verified	2016-04-29	27	griseocollis !	Website
	858	bee	486	vosnesenskii	Yellow-faced bumble bee	California	United States	2014-01-15	Female	126	Verified	2016-04-29	27	vosnesenskii !	Website
	859	bee	487	mixtus	Fuzzy-horned bumble bee	Oregon	United States	2007-06-17	Female	1071	Verified	2014-10-17	27	mixtus !	Website
	860	bee	488	sp.	Bumble bee	Oregon	United States	2012-05-25	Female	1071	Verified	2016-04-29	27	sp. !	Website
	861	bee	489	vosnesenskii	Yellow-faced bumble bee	California	United States	2014-01-21	Female	6996	Verified	2015-02-26	27	vosnesenskii !	Website
	862	bee	490	melanopygus	Black-tailed bumble bee	California	United States	2014-01-23	Female	6996	Verified	2016-04-29	27	melanopygus !	Website
	863	bee	491	fervidus	Yellow bumble bee	Iowa	United States	2013-05-17	Female	6009	Verified	2016-04-29	27	fervidus !	Website
	864	bee	492	griseocollis	Brown-belted bumble bee	Iowa	United States	2013-06-08	Female	6009	Verified	2014-02-14	30	griseocollis !	Website
	865	bee	493	sp.	Bumble bee	Iowa	United States	2013-05-17	Female	6009	Verified	2016-04-29	27	sp. !	Website
	866	bee	494	griseocollis	Brown-belted bumble bee	Oklahoma	United States	2013-08-12	Female	7163	Verified	2014-02-14	30	griseocollis !	Website
	867	bee	495	griseocollis	Brown-belted bumble bee	Oklahoma	United States	2013-08-22	Male	7163	Verified	2014-07-15	27	griseocollis !	Website
	868	bee	496	pensylvanicus	American bumble bee	Oklahoma	United States	2013-08-22	Female	7163	Verified	2014-07-15	27	pensylvanicus !	Website
	869	bee	497	griseocollis	Brown-belted bumble bee	Oklahoma	United States	2013-08-22	Female	7163	Verified	2016-04-29	27	griseocollis !	Website
	870	bee	498	impatiens	Common eastern bumble bee	Oklahoma	United States	2013-08-27	Female	7163	Verified	2014-07-15	27	impatiens !	Website
	871	bee	499	sp.	Bumble bee	Oklahoma	United States	2013-08-14	Female	7163	Verified	2017-12-01	27	sp.	Website
	872	bee	500	sp.	Bumble bee	Oklahoma	United States	2012-07-22	Female	7163	Verified	2017-12-01	27	sp.	Website
	873	bee	501	auricomus	Black and gold bumble bee	Iowa	United States	2013-07-17	Female	6009	Verified	2017-12-01	27	pensylvanicus	Website
	874	bee	503	bifarius	Two-form bumble bee	Oregon	United States	2013-07-14	Female	1267	Verified	2017-12-01	27	sitkensis	Website
	875	bee	504	sp.	Bumble bee	Oregon	United States	2013-06-16	Female	1267	Verified	2016-10-24	27	sylvicola	Website
	876	bee	505	melanopygus	Black-tailed bumble bee	Washington	United States	2011-06-26	Female	1930	Verified	2014-02-07	27	melanopygus !	Website
	877	bee	506	mixtus	Fuzzy-horned bumble bee	Washington	United States	2011-06-25	Female	1930	Verified	2014-02-07	27	mixtus !	Website
	878	bee	507	fraternus	Southern plains bumble bee	Texas	United States	2013-10-01	Male	1161	Verified	2014-02-07	27	fraternus !	Website
	879	bee	508	vosnesenskii	Yellow-faced bumble bee	Washington	United States	2011-06-25	Female	1930	Verified	2015-02-26	27	vosnesenskii !	Website
	880	bee	509	pensylvanicus	American bumble bee	Texas	United States	2013-10-09	Male	1161	Verified	2014-02-07	27	pensylvanicus !	Website
	881	bee	510	pensylvanicus	American bumble bee	Texas	United States	2013-10-09	Male	1161	Verified	2014-02-07	27	pensylvanicus !	Website
	882	bee	511	pensylvanicus	American bumble bee	Texas	United States	2013-10-09	Male	1161	Verified	2014-02-07	27	pensylvanicus !	Website
	883	bee	512	pensylvanicus	American bumble bee	Texas	United States	2013-10-19	Female	1161	Verified	2014-02-07	27	pensylvanicus !	Website
	884	bee	513	pensylvanicus	American bumble bee	Texas	United States	2013-10-19	Not Determined	1161	Verified	2015-05-18	27	pensylvanicus !	Website
	885	bee	514	pensylvanicus	American bumble bee	Texas	United States	2013-10-19	Male	1161	Verified	2014-02-07	27	pensylvanicus !	Website
	886	bee	515	pensylvanicus	American bumble bee	Texas	United States	2013-10-19	Male	1161	Verified	2014-02-07	27	pensylvanicus !	Website
	887	bee	516	pensylvanicus	American bumble bee	Texas	United States	2013-10-19	Male	1161	Verified	2014-02-07	27	pensylvanicus !	Website
	888	bee	517	pensylvanicus	American bumble bee	Oklahoma	United States	2012-07-22	Male	7163	Verified	2016-10-24	27	pensylvanicus	Website
	889	bee	518	pensylvanicus	American bumble bee	Oklahoma	United States	2012-07-22	Male	7163	Verified	2016-10-24	27	sp.	Website
	890	bee	519	pensylvanicus	American bumble bee	Texas	United States	2013-09-07	Not Determined	1161	Verified	2015-05-18	27	pensylvanicus !	Website
	891	bee	520	pensylvanicus	American bumble bee	Texas	United States	2013-08-24	Not Determined	1161	Verified	2015-05-18	27	pensylvanicus !	Website
	892	bee	521	fraternus	Southern plains bumble bee	Texas	United States	2013-08-24	Male	1161	Verified	2014-02-14	30	fraternus !	Website
	893	bee	523	pensylvanicus	American bumble bee	Texas	United States	2013-08-24	Not Determined	1161	Verified	2015-05-18	27	pensylvanicus !	Website
	894	bee	524	pensylvanicus	American bumble bee	Texas	United States	2013-07-27	Not Determined	1161	Verified	2015-05-18	27	pensylvanicus !	Website
	895	bee	525	pensylvanicus	American bumble bee	Texas	United States	2013-07-20	Not Determined	1161	Verified	2015-05-18	27	pensylvanicus !	Website
	896	bee	526	pensylvanicus	American bumble bee	Texas	United States	2013-07-21	Not Determined	1161	Verified	2015-05-18	27	pensylvanicus !	Website
	897	bee	527	pensylvanicus	American bumble bee	Texas	United States	2013-07-11	Not Determined	1161	Verified	2015-05-18	27	pensylvanicus !	Website
	898	bee	528	pensylvanicus	American bumble bee	Texas	United States	2013-07-07	Not Determined	1161	Verified	2015-05-18	27	pensylvanicus !	Website
	899	bee	529	griseocollis	Brown-belted bumble bee	Texas	United States	2013-07-01	Female	1161	Verified	2014-02-14	30	griseocollis !	Website
	900	bee	530	pensylvanicus	American bumble bee	Texas	United States	2013-07-01	Not Determined	1161	Verified	2015-05-18	27	pensylvanicus !	Website
	901	bee	531	sp.	Bumble bee	Texas	United States	2013-06-21	Not Determined	1161	Verified	2015-05-18	27	sp. !	Website
	902	bee	532	pensylvanicus	American bumble bee	Texas	United States	2013-06-21	Not Determined	1161	Verified	2015-05-18	27	pensylvanicus !	Website
	903	bee	533	pensylvanicus	American bumble bee	Texas	United States	2013-06-24	Not Determined	1161	Verified	2015-05-18	27	pensylvanicus !	Website
	904	bee	534	pensylvanicus	American bumble bee	Texas	United States	2013-06-24	Not Determined	1161	Verified	2015-05-18	27	pensylvanicus !	Website
	905	bee	535	pensylvanicus	American bumble bee	Texas	United States	2013-06-21	Female	1161	Verified	2014-02-14	27	pensylvanicus !	Website
	906	bee	536	pensylvanicus	American bumble bee	Texas	United States	2013-05-01	Female	1161	Verified	2014-02-14	27	pensylvanicus !	Website
	907	bee	537	pensylvanicus	American bumble bee	Texas	United States	2013-04-17	Female	1161	Verified	2014-02-14	27	pensylvanicus !	Website
	908	bee	538	pensylvanicus	American bumble bee	Texas	United States	2013-04-17	Female	1161	Verified	2014-02-14	27	pensylvanicus !	Website
	909	bee	539	griseocollis	Brown-belted bumble bee	Texas	United States	2013-04-17	Female	1161	Verified	2014-02-14	27	griseocollis !	Website
	910	bee	540	vagans	Half-black bumble bee	Alberta	Canada	2012-07-18	Female	2856	Verified	2014-02-14	27	vagans !	Website
	911	bee	541	vagans	Half-black bumble bee	Manitoba	Canada	2009-08-04	Male	7334	Verified	2014-02-14	27	vagans !	Website
	912	bee	542	nevadensis	Nevada bumble bee	Alberta	Canada	2012-07-18	Male	2856	Verified	2014-02-14	27	nevadensis !	Website
	913	bee	543	terricola	Yellow-banded bumble bee	Manitoba	Canada	2013-09-29	Female	7334	Verified	2014-02-14	30	terricola !	Website
	914	bee	544	rufocinctus	Red-belted bumble bee	Manitoba	Canada	2009-06-26	Female	7334	Verified	2014-02-14	27	rufocinctus !	Website
	915	bee	545	terricola	Yellow-banded bumble bee	Manitoba	Canada	2013-09-29	Male	7334	Verified	2014-02-14	30	terricola !	Website
	916	bee	546	griseocollis	Brown-belted bumble bee	Manitoba	Canada	2011-09-14	Female	7334	Verified	2014-02-14	27	griseocollis !	Website
	917	bee	547	griseocollis	Brown-belted bumble bee	Texas	United States	2013-05-11	Female	3823	Verified	2014-02-14	27	griseocollis !	Website
	918	bee	548	griseocollis	Brown-belted bumble bee	Texas	United States	2012-06-04	Female	3823	Verified	2014-02-14	27	griseocollis !	Website
	919	bee	549	fraternus	Southern plains bumble bee	Texas	United States	2012-08-21	Male	3823	Verified	2014-02-13	27	fraternus !	Website
	920	bee	550	fraternus	Southern plains bumble bee	Texas	United States	2011-10-05	Female	3823	Verified	2014-02-13	27	fraternus !	Website
	921	bee	551	pensylvanicus	American bumble bee	Texas	United States	2012-08-21	Male	3823	Verified	2014-02-13	27	pensylvanicus !	Website
	922	bee	552	pensylvanicus	American bumble bee	Texas	United States	2012-08-21	Female	3823	Verified	2014-02-13	27	pensylvanicus !	Website
	923	bee	554	impatiens	Common eastern bumble bee	Texas	United States	2011-06-22	Not Determined	3823	Verified	2016-10-24	27	impatiens	Website
	924	bee	555	griseocollis	Brown-belted bumble bee	Texas	United States	2011-06-12	Not Determined	3823	Verified	2016-10-24	27	griseocollis	Website
	925	bee	556	griseocollis	Brown-belted bumble bee	Texas	United States	2012-07-10	Male	3823	Verified	2016-05-12	18	griseocollis !	Website
	926	bee	558	griseocollis	Brown-belted bumble bee	Texas	United States	2011-07-04	Male	3823	Verified	2014-02-14	30	griseocollis !	Website
	927	bee	559	impatiens	Common eastern bumble bee	Massachusetts	United States	2013-11-16	Male	7682	Verified	2014-02-13	27	sp.	Website
	928	bee	560	impatiens	Common eastern bumble bee	Massachusetts	United States	2013-10-13	Male	7682	Verified	2014-02-13	27	impatiens !	Website
	929	bee	561	impatiens	Common eastern bumble bee	Texas	United States	2012-11-01	Male	1161	Verified	2014-02-13	27	impatiens !	Website
	930	bee	562	pensylvanicus	American bumble bee	Texas	United States	2012-09-14	Male	1161	Verified	2014-02-13	27	pensylvanicus !	Website
	931	bee	563	cryptarum	Cryptic bumble bee	Alberta	Canada	2012-07-18	Female	2856	Verified	2014-11-03	27	cryptarum !	Website
	932	bee	564	rufocinctus	Red-belted bumble bee	Alberta	Canada	2013-05-31	Male	2856	Verified	2014-02-13	27	rufocinctus !	Website
	933	bee	565	rufocinctus	Red-belted bumble bee	Alberta	Canada	2013-05-05	Female	2856	Verified	2016-10-24	27	rufocinctus	Website
	934	bee	566	rufocinctus	Red-belted bumble bee	Alberta	Canada	2013-06-08	Female	2856	Verified	2016-10-24	27	rufocinctus	Website
	935	bee	568	sp.	Bumble bee	Washington	United States	2013-07-24	Male	3570	Verified	2014-02-13	27	sp. !	Website
	936	bee	569	impatiens	Common eastern bumble bee	Michigan	United States	2013-08-01	Male	7940	Verified	2014-02-13	27	impatiens !	Website
	937	bee	570	vagans	Half-black bumble bee	Alberta	Canada	2012-06-25	Male	2856	Verified	2014-02-13	27	vagans !	Website
	938	bee	571	Unknown	Not a bumble bee	Alberta	Canada	2013-05-03	Female	2856	Invalid	2016-10-24	27	sp.	Website
	939	bee	572	ternarius	Tri-colored bumble bee	Alberta	Canada	2013-05-03	Male	2856	Verified	2014-02-13	27	ternarius !	Website
	940	bee	573	terricola	Yellow-banded bumble bee	Alberta	Canada	2012-07-29	Male	2856	Verified	2014-02-13	27	terricola !	Website
	941	bee	574	impatiens	Common eastern bumble bee	British Columbia	Canada	2013-10-06	Male	2974	Verified	2014-02-13	27	impatiens !	Website
	942	bee	575	fervidus	Yellow bumble bee	Iowa	United States	2014-02-12	Not Determined	6009	Verified	2016-10-24	27	fervidus	Website
	943	bee	576	impatiens	Common eastern bumble bee	New York	United States	2013-08-20	Female	3436	Verified	2016-10-24	27	impatiens	Website
	944	bee	577	bimaculatus	Two-spotted bumble bee	New York	United States	2013-06-16	Female	3436	Verified	2014-02-13	27	vagans	Website
	945	bee	578	impatiens	Common eastern bumble bee	New York	United States	2013-05-15	Female	3436	Verified	2014-02-13	27	affinis	Website
	946	bee	579	sp.	Bumble bee	Oregon	United States	2013-07-08	Male	5886	Verified	2014-02-13	27	sp. !	Website
	947	bee	580	impatiens	Common eastern bumble bee	New York	United States	2006-09-07	Male	3436	Verified	2014-02-13	27	sandersoni	Website
	948	bee	581	bimaculatus	Two-spotted bumble bee	New York	United States	2007-07-04	Male	3436	Verified	2014-02-14	30	bimaculatus !	Website
	949	bee	582	sitkensis	Sitka bumble bee	Oregon	United States	2013-07-08	Female	5886	Verified	2016-10-24	27	rufocinctus	Website
	950	bee	583	impatiens	Common eastern bumble bee	New York	United States	2008-06-19	Female	3436	Verified	2014-02-13	27	impatiens !	Website
	951	bee	584	bimaculatus	Two-spotted bumble bee	Quebec	Canada	2013-08-02	Female	298	Verified	2014-02-13	27	bimaculatus !	Website
	952	bee	585	impatiens	Common eastern bumble bee	Quebec	Canada	2008-10-04	Male	298	Verified	2014-02-13	27	impatiens !	Website
	953	bee	586	griseocollis	Brown-belted bumble bee	Washington	United States	2013-10-06	Male	3570	Verified	2014-02-20	27	griseocollis !	Website
	954	bee	587	sp.	Bumble bee	Oregon	United States	2013-07-01	Male	5886	Verified	2014-02-20	27	sp. !	Website
	955	bee	588	sp.	Bumble bee	Oregon	United States	2013-06-22	Male	5886	Verified	2014-02-20	27	sp. !	Website
	956	bee	589	Unknown	Not a bumble bee	Oregon	United States	2013-06-22	Male	5886	Invalid	2014-02-20	27	sp.	Website
	957	bee	591	impatiens	Common eastern bumble bee	Maryland	United States	2013-07-12	Male	5617	Verified	2014-02-20	27	impatiens !	Website
	958	bee	592	Unknown	Not a bumble bee	Maryland	United States	2013-09-12	Female	5617	Invalid	2014-02-20	27	sp.	Website
	959	bee	593	impatiens	Common eastern bumble bee	Maryland	United States	2013-07-26	Male	5617	Verified	2014-02-20	27	impatiens !	Website
	960	bee	594	sp.	Bumble bee	Maryland	United States	2013-07-21	Male	5617	Verified	2014-02-20	27	sp. !	Website
	961	bee	595	sp.	Bumble bee	Oregon	United States	2012-08-05	Male	5886	Verified	2014-02-20	27	sp. !	Website
	962	bee	596	vosnesenskii or caliginosus	Yellow-faced group	Oregon	United States	2013-07-01	Female	5886	Verified	2015-05-01	27	vosnesenskii or caliginosus !	Website
	963	bee	597	sylvicola	Forest bumble bee	Alaska	United States	2012-07-20	Male	3572	Verified	2014-02-20	27	sylvicola !	Website
	964	bee	598	fraternus	Southern plains bumble bee	Texas	United States	2012-08-17	Male	1161	Verified	2014-02-20	27	fraternus !	Website
	965	bee	599	melanopygus	Black-tailed bumble bee	Oregon	United States	2014-02-13	Male	5120	Verified	2014-02-20	27	melanopygus !	Website
	966	bee	600	impatiens	Common eastern bumble bee	Indiana	United States	2011-09-05	Male	4182	Verified	2014-02-20	27	impatiens !	Website
	967	bee	601	sp.	Bumble bee	California	United States	2014-02-16	Female	4016	Verified	2014-02-20	27	sp. !	Website
	968	bee	603	sp.	Bumble bee	California	United States	2014-02-17	Female	4656	Verified	2014-02-20	27	sp. !	Website
	969	bee	604	rufocinctus	Red-belted bumble bee	Wyoming	United States	2013-06-30	Female	6158	Verified	2014-02-20	27	rufocinctus !	Website
	970	bee	605	rufocinctus	Red-belted bumble bee	Wyoming	United States	2013-06-23	Female	6158	Verified	2015-07-10	27	rufocinctus !	Website
	971	bee	606	appositus	White-shouldered bumble bee	Wyoming	United States	2013-06-28	Female	6158	Verified	2014-02-20	27	appositus !	Website
	972	bee	609	occidentalis	Western bumble bee	Wyoming	United States	2013-08-13	Female	6158	Verified	2014-02-20	27	occidentalis !	Website
	973	bee	610	occidentalis	Western bumble bee	Wyoming	United States	2013-08-13	Female	6158	Verified	2014-02-20	27	occidentalis !	Website
	974	bee	611	borealis	Northern amber bumble bee	Quebec	Canada	2000-06-17	Female	298	Verified	2015-07-14	23	borealis	Website
	975	bee	612	Unknown	Not a bumble bee	New York	United States	2013-08-16	Male	494	Invalid	2014-02-21	27	sp.	Website
	976	bee	613	impatiens	Common eastern bumble bee	Quebec	Canada	2006-06-06	Male	298	Verified	2014-02-21	27	impatiens !	Website
	977	bee	614	impatiens	Common eastern bumble bee	New York	United States	2013-10-04	Male	494	Verified	2014-02-21	27	impatiens !	Website
	978	bee	615	sp.	Bumble bee	Wisconsin	United States	2013-08-31	Female	5490	Verified	2016-10-24	27	impatiens	Website
	979	bee	616	rufocinctus	Red-belted bumble bee	Wyoming	United States	2013-06-10	Female	6158	Verified	2015-07-10	27	rufocinctus !	Website
	980	bee	617	rufocinctus	Red-belted bumble bee	Wyoming	United States	2013-06-10	Female	6158	Verified	2014-03-27	27	rufocinctus !	Website
	981	bee	618	vagans	Half-black bumble bee	Ontario	Canada	2013-09-20	Female	1279	Verified	2014-02-25	30	vagans !	Website
	982	bee	619	griseocollis	Brown-belted bumble bee	Ontario	Canada	2013-08-03	Male	1279	Verified	2014-02-25	30	griseocollis !	Website
	983	bee	620	impatiens	Common eastern bumble bee	Ontario	Canada	2013-09-29	Male	1279	Verified	2014-02-25	30	impatiens !	Website
	984	bee	622	centralis	Central bumble bee	Wyoming	United States	2013-08-06	Male	6158	Verified	2014-03-27	27	centralis !	Website
	985	bee	623	rufocinctus	Red-belted bumble bee	Washington	United States	2013-05-25	Female	2269	Verified	2016-10-24	27	rufocinctus	Website
	986	bee	627	centralis	Central bumble bee	Wyoming	United States	2013-08-06	Male	6158	Verified	2014-03-27	27	flavifrons	Website
	987	bee	628	bifarius	Two-form bumble bee	Washington	United States	2009-07-21	Female	2269	Verified	2016-10-24	27	sp.	Website
	988	bee	629	sp.	Bumble bee	Wyoming	United States	2013-08-06	Male	6158	Verified	2014-03-27	27	sp. !	Website
	989	bee	630	sp.	Bumble bee	Wyoming	United States	2013-08-06	Male	6158	Verified	2014-03-27	27	sp. !	Website
	990	bee	631	nevadensis	Nevada bumble bee	Washington	United States	2009-07-21	Male	2269	Verified	2016-10-24	27	nevadensis	Website
	991	bee	632	appositus	White-shouldered bumble bee	Washington	United States	2011-08-18	Female	2269	Verified	2016-10-24	27	fervidus	Website
	992	bee	633	Unknown	Not a bumble bee	Wyoming	United States	2013-08-06	Female	6158	Invalid	2017-12-01	27	sp.	Website
	993	bee	634	sp.	Bumble bee	Washington	United States	2011-08-18	Female	2269	Verified	2014-11-07	8	sp. !	Website
	994	bee	635	mixtus	Fuzzy-horned bumble bee	Wyoming	United States	2013-08-06	Male	6158	Verified	2014-03-27	27	mixtus !	Website
	995	bee	636	rufocinctus	Red-belted bumble bee	Washington	United States	2011-06-10	Female	2269	Verified	2016-10-24	27	rufocinctus	Website
	996	bee	637	nevadensis	Nevada bumble bee	Washington	United States	2011-06-10	Female	2269	Verified	2016-10-24	27	rufocinctus	Website
	997	bee	638	vagans	Half-black bumble bee	Washington	United States	2012-09-14	Female	2269	Verified	2016-10-24	27	kirbiellus	Website
	998	bee	639	fervidus	Yellow bumble bee	Washington	United States	2013-06-14	Male	2269	Verified	2016-10-24	27	sp.	Website
	999	bee	640	centralis	Central bumble bee	Wyoming	United States	2013-08-06	Female	6158	Verified	2014-03-27	27	centralis !	Website
	1000	bee	641	centralis	Central bumble bee	Wyoming	United States	2013-08-06	Male	6158	Verified	2014-03-27	27	centralis !	Website
	1001	bee	642	centralis	Central bumble bee	Wyoming	United States	2013-08-06	Male	6158	Verified	2014-03-27	27	centralis !	Website
	1002	bee	643	mixtus	Fuzzy-horned bumble bee	Wyoming	United States	2013-08-06	Male	6158	Verified	2014-03-27	27	mixtus !	Website
	1003	bee	644	melanopygus	Black-tailed bumble bee	California	United States	2014-02-23	Female	4016	Verified	2016-10-24	27	melanopygus	Website
	1004	bee	645	fervidus	Yellow bumble bee	Oregon	United States	2012-07-13	Female	1071	Verified	2015-05-15	27	fervidus !	Website
	1005	bee	646	sp.	Bumble bee	Oregon	United States	2013-08-10	Female	7889	Verified	2016-10-24	27	caliginosus	Website
	1006	bee	648	melanopygus	Black-tailed bumble bee	Oregon	United States	2013-07-01	Female	7889	Verified	2016-10-24	27	flavifrons	Website
	1007	bee	649	sp.	Bumble bee	Quebec	Canada	2013-07-06	Female	298	Verified	2016-10-24	27	sandersoni	Website
	1008	bee	651	vosnesenskii	Yellow-faced bumble bee	California	United States	2007-07-06	Male	1846	Verified	2016-10-24	27	sp.	Website
	1009	bee	652	bimaculatus	Two-spotted bumble bee	Quebec	Canada	2012-04-19	Female	298	Verified	2016-10-24	27	impatiens	Website
	1010	bee	653	bifarius	Two-form bumble bee	Wyoming	United States	2012-09-22	Female	6158	Verified	2014-03-27	27	rufocinctus	Website
	1011	bee	654	rufocinctus	Red-belted bumble bee	Wyoming	United States	2012-09-22	Female	6158	Verified	2015-07-10	27	rufocinctus !	Website
	1012	bee	655	rufocinctus	Red-belted bumble bee	Wyoming	United States	2012-09-22	Female	6158	Verified	2015-07-10	27	rufocinctus !	Website
	1013	bee	656	vosnesenskii	Yellow-faced bumble bee	California	United States	2014-03-01	Female	2286	Verified	2015-02-26	27	vosnesenskii !	Website
	1014	bee	657	Unknown	Not a bumble bee	Oregon	United States	2014-03-01	Female	5886	Invalid	2016-10-24	27	sp.	Website
	1015	bee	658	occidentalis	Western bumble bee	Wyoming	United States	2013-08-01	Male	6158	Verified	2014-03-27	27	occidentalis !	Website
	1016	bee	661	griseocollis	Brown-belted bumble bee	Wyoming	United States	2013-09-05	Male	6158	Verified	2014-03-07	30	griseocollis !	Website
	1017	bee	662	vagans	Half-black bumble bee	Wyoming	United States	2013-09-07	Female	6158	Verified	2015-07-10	27	vagans !	Website
	1018	bee	663	vagans	Half-black bumble bee	Wyoming	United States	2013-09-07	Female	6158	Verified	2015-07-10	27	vagans !	Website
	1019	bee	664	vagans	Half-black bumble bee	Wyoming	United States	2013-09-07	Female	6158	Verified	2015-07-10	27	vagans !	Website
	1020	bee	665	terricola	Yellow-banded bumble bee	Saskatchewan	Canada	2013-07-15	Female	7364	Verified	2014-03-07	30	terricola !	Website
	1021	bee	666	perplexus	Confusing bumble bee	Minnesota	United States	2011-07-17	Male	7364	Verified	2016-05-13	7	perplexus !	Website
	1022	bee	667	bimaculatus	Two-spotted bumble bee	Minnesota	United States	2011-07-14	Female	7364	Verified	2014-03-07	30	bimaculatus !	Website
	1023	bee	668	griseocollis	Brown-belted bumble bee	Minnesota	United States	2013-07-30	Male	7364	Verified	2014-03-07	30	griseocollis !	Website
	1024	bee	669	griseocollis	Brown-belted bumble bee	Wisconsin	United States	2013-06-28	Female	5851	Verified	2016-10-24	27	griseocollis	Website
	1025	bee	670	huntii	Hunt's bumble bee	Montana	United States	2012-05-14	Female	5851	Verified	2015-02-05	27	huntii !	Website
	1026	bee	672	insularis	Indiscriminant cuckoo bumble bee	Montana	United States	2012-05-14	Female	5851	Verified	2017-02-25	27	suckleyi	Website
	1027	bee	673	griseocollis	Brown-belted bumble bee	Wisconsin	United States	2013-06-29	Female	5851	Verified	2014-03-07	30	griseocollis !	Website
	1028	bee	674	rufocinctus	Red-belted bumble bee	Wisconsin	United States	2013-07-01	Not Determined	5851	Verified	2017-12-01	27	rufocinctus	Website
	1029	bee	675	Unknown	Not a bumble bee	California	United States	2014-03-05	Male	2993	Invalid	2014-03-07	30	sp.	Website
	1030	bee	676	Unknown	Not a bumble bee	California	United States	2014-03-05	Male	2993	Invalid	2014-03-07	30	sp.	Website
	1031	bee	677	impatiens	Common eastern bumble bee	Wisconsin	United States	2013-07-15	Female	5851	Verified	2014-03-07	30	impatiens !	Website
	1032	bee	680	griseocollis	Brown-belted bumble bee	Wisconsin	United States	2013-07-20	Female	5851	Verified	2014-03-07	30	griseocollis !	Website
	1033	bee	681	affinis	Rusty-patched bumble bee	Wisconsin	United States	2013-07-21	Female	5851	Verified	2014-03-07	30	affinis !	Website
	1034	bee	682	impatiens	Common eastern bumble bee	Ontario	Canada	2013-08-18	Female	6400	Verified	2014-04-16	30	impatiens !	Website
	1035	bee	683	vosnesenskii	Yellow-faced bumble bee	California	United States	2014-03-06	Female	7134	Verified	2017-12-01	27	sp.	Website
	1036	bee	684	sp.	Bumble bee	California	United States	2014-03-06	Female	7134	Verified	2017-12-01	27	sp.	Website
	1037	bee	685	occidentalis	Western bumble bee	Idaho	United States	2013-07-12	Female	6001	Verified	2014-11-03	27	occidentalis !	Website
	1038	bee	686	occidentalis	Western bumble bee	Idaho	United States	2013-08-26	Male	6001	Verified	2014-03-18	27	occidentalis !	Website
	1039	bee	687	Unknown	Not a bumble bee	Idaho	United States	2013-08-02	Female	6001	Invalid	2017-08-09	27	occidentalis	Website
	1040	bee	688	impatiens	Common eastern bumble bee	Ontario	Canada	2012-09-20	Female	6845	Verified	2014-03-07	30	impatiens !	Website
	1041	bee	690	bimaculatus	Two-spotted bumble bee	Wisconsin	United States	2013-07-25	Female	8048	Verified	2017-06-21	25	bimaculatus	Website
	1042	bee	691	impatiens	Common eastern bumble bee	Wisconsin	United States	2013-08-11	Female	8048	Verified	2017-08-17	25	bimaculatus	Website
	1043	bee	694	impatiens	Common eastern bumble bee	Wisconsin	United States	2013-07-21	Female	5851	Verified	2014-03-14	30	impatiens !	Website
	1044	bee	695	citrinus	Lemon cuckoo bumble bee	Wisconsin	United States	2013-08-23	Male	5851	Verified	2014-03-14	30	citrinus !	Website
	1045	bee	696	citrinus	Lemon cuckoo bumble bee	Wisconsin	United States	2013-08-23	Male	5851	Verified	2014-03-14	30	citrinus !	Website
	1046	bee	697	impatiens	Common eastern bumble bee	Wisconsin	United States	2013-08-23	Female	5851	Verified	2014-03-14	30	impatiens !	Website
	1047	bee	698	bimaculatus	Two-spotted bumble bee	Wisconsin	United States	2012-05-30	Male	5851	Verified	2014-03-14	30	bimaculatus !	Website
	1048	bee	699	vosnesenskii	Yellow-faced bumble bee	California	United States	2014-03-08	Female	2286	Verified	2015-02-26	27	vosnesenskii !	Website
	1049	bee	700	bimaculatus	Two-spotted bumble bee	Wisconsin	United States	2013-05-30	Female	8048	Verified	2017-12-01	27	bimaculatus	Website
	1050	bee	701	Unknown	Not a bumble bee	California	United States	2014-03-09	Female	7746	Invalid	2017-12-01	27	sp.	Website
	1051	bee	702	Unknown	Not a bumble bee	Arizona	United States	2014-03-09	Male	1240	Invalid	2014-03-14	30	sp.	Website
	1052	bee	703	vosnesenskii	Yellow-faced bumble bee	Washington	United States	2014-03-09	Female	4675	Verified	2015-02-26	27	vosnesenskii !	Website
	1053	bee	704	melanopygus	Black-tailed bumble bee	Washington	United States	2014-03-09	Female	4675	Verified	2014-11-07	8	melanopygus !	Website
	1054	bee	705	vosnesenskii	Yellow-faced bumble bee	California	United States	2014-03-05	Female	7814	Verified	2015-02-26	27	vosnesenskii !	Website
	1055	bee	706	melanopygus	Black-tailed bumble bee	California	United States	2014-03-05	Female	7814	Verified	2017-12-01	27	melanopygus	Website
	1056	bee	707	vosnesenskii	Yellow-faced bumble bee	California	United States	2014-02-10	Female	4656	Verified	2017-12-01	27	sp.	Website
	1057	bee	708	Unknown	Not a bumble bee	Nebraska	United States	2007-09-15	Female	6481	Invalid	2017-12-01	27	sp.	Website
	1058	bee	709	Unknown	Not a bumble bee	Nebraska	United States	2007-09-15	Female	6481	Invalid	2017-12-01	27	auricomus	Website
	1059	bee	710	Unknown	Not a bumble bee	Georgia	United States	2014-03-11	Female	5228	Invalid	2017-12-01	27	sp.	Website
	1060	bee	712	Unknown	Not a bumble bee	Georgia	United States	2014-03-11	Not Determined	5228	Invalid	2017-12-01	27	sp.	Website
	1061	bee	713	vosnesenskii	Yellow-faced bumble bee	Oregon	United States	2014-03-11	Female	4008	Verified	2015-02-09	27	vosnesenskii !	Website
	1062	bee	714	Unknown	Not a bumble bee	Georgia	United States	2014-03-11	Female	5228	Invalid	2017-12-01	27	sp.	Website
	1063	bee	715	Unknown	Not a bumble bee	California	United States	2014-03-11	Male	2993	Invalid	2014-09-08	8	sp.	Website
	1064	bee	716	Unknown	Not a bumble bee	California	United States	2014-03-11	Male	2993	Invalid	2014-09-08	8	sp.	Website
	1065	bee	718	flavifrons	Yellow head bumble bee	Washington	United States	2014-03-11	Female	5861	Verified	2017-09-13	25	flavifrons	Website
	1066	bee	719	sp.	Bumble bee	Washington	United States	2014-03-12	Female	1151	Verified	2017-09-13	25	sp.	Website
	1067	bee	720	vosnesenskii or caliginosus	Yellow-faced group	Oregon	United States	2014-03-12	Female	6113	Verified	2015-02-09	27	vosnesenskii or caliginosus !	Website
	1068	bee	721	melanopygus	Black-tailed bumble bee	Oregon	United States	2014-03-12	Female	6113	Verified	2016-05-10	27	melanopygus !	Website
	1069	bee	722	huntii	Hunt's bumble bee	Idaho	United States	2014-03-12	Female	3703	Verified	2015-02-05	27	huntii !	Website
	1070	bee	724	pensylvanicus	American bumble bee	Texas	United States	2013-10-07	Not Determined	4615	Verified	2017-12-01	27	pensylvanicus	Website
	1071	bee	725	pensylvanicus	American bumble bee	Texas	United States	2013-10-07	Female	4615	Verified	2016-06-15	18	pensylvanicus !	Website
	1072	bee	726	Unknown	Not a bumble bee	Texas	United States	2013-10-07	Male	4615	Invalid	2014-03-14	30	sp.	Website
	1073	bee	727	vosnesenskii	Yellow-faced bumble bee	Oregon	United States	2014-03-12	Female	5121	Verified	2017-11-21	25	vosnesenskii	Website
	1074	bee	728	vosnesenskii	Yellow-faced bumble bee	Oregon	United States	2014-03-12	Female	5121	Verified	2017-11-21	25	vosnesenskii	Website
	1075	bee	729	melanopygus	Black-tailed bumble bee	Oregon	United States	2014-03-07	Female	4513	Verified	2014-10-06	8	melanopygus !	Website
	1076	bee	730	mixtus	Fuzzy-horned bumble bee	Washington	United States	2014-03-12	Female	7126	Verified	2014-06-13	27	mixtus !	Website
	1077	bee	731	flavifrons	Yellow head bumble bee	Oregon	United States	2014-03-13	Female	4008	Verified	2017-11-16	25	flavifrons	Website
	1078	bee	732	flavifrons	Yellow head bumble bee	Oregon	United States	2014-03-13	Female	4008	Verified	2017-11-16	25	flavifrons	Website
	1079	bee	733	impatiens	Common eastern bumble bee	Illinois	United States	2011-08-28	Female	6893	Verified	2014-03-14	30	impatiens !	Website
	1080	bee	734	impatiens	Common eastern bumble bee	Illinois	United States	2009-08-23	Female	6893	Verified	2014-03-14	30	impatiens !	Website
	1081	bee	735	impatiens	Common eastern bumble bee	Quebec	Canada	2005-07-12	Female	298	Verified	2014-03-14	30	impatiens !	Website
	1082	bee	736	Unknown	Not a bumble bee	Minnesota	United States	2013-09-12	Male	6781	Invalid	2014-03-14	30	sp.	Website
	1083	bee	737	huntii	Hunt's bumble bee	Wyoming	United States	2012-05-15	Female	2557	Verified	2014-03-19	27	huntii !	Website
	1084	bee	738	bifarius	Two-form bumble bee	Washington	United States	2014-03-13	Female	7344	Verified	2014-03-19	27	bifarius !	Website
	1085	bee	739	vosnesenskii	Yellow-faced bumble bee	Washington	United States	2014-03-15	Female	1930	Verified	2014-03-19	27	vosnesenskii !	Website
	1086	bee	740	melanopygus	Black-tailed bumble bee	Washington	United States	2014-03-15	Female	1930	Verified	2014-03-19	27	melanopygus !	Website
	1087	bee	741	melanopygus	Black-tailed bumble bee	Oregon	United States	2014-03-16	Female	4008	Verified	2014-03-19	27	melanopygus !	Website
	1088	bee	742	bimaculatus	Two-spotted bumble bee	Minnesota	United States	2013-08-02	Female	7300	Verified	2014-03-18	27	bimaculatus !	Website
	1089	bee	743	melanopygus	Black-tailed bumble bee	California	United States	2014-03-17	Female	2286	Verified	2014-03-18	27	melanopygus !	Website
	1090	bee	744	perplexus	Confusing bumble bee	Alberta	Canada	2012-07-26	Female	2856	Verified	2014-03-18	27	perplexus !	Website
	1091	bee	745	Unknown	Not a bumble bee	California	United States	2014-03-15	Male	2993	Invalid	2014-03-18	27	sp.	Website
	1092	bee	746	vosnesenskii	Yellow-faced bumble bee	California	United States	2014-03-15	Male	2993	Verified	2014-09-29	8	occidentalis	Website
	1093	bee	748	Unknown	Not a bumble bee	California	United States	2014-03-16	Male	2993	Invalid	2014-03-18	27	sp.	Website
	1094	bee	749	vosnesenskii	Yellow-faced bumble bee	California	United States	2014-03-17	Female	4806	Verified	2014-03-18	27	vosnesenskii !	Website
	1095	bee	750	vosnesenskii	Yellow-faced bumble bee	California	United States	2014-03-17	Female	4806	Verified	2015-02-26	27	vosnesenskii !	Website
	1096	bee	751	sp.	Bumble bee	Michigan	United States	2013-07-30	Male	8387	Verified	2014-03-18	27	sp. !	Website
	1097	bee	752	pensylvanicus	American bumble bee	California	United States	2004-08-01	Female	8254	Verified	2014-03-18	27	pensylvanicus !	Website
	1098	bee	753	vosnesenskii	Yellow-faced bumble bee	California	United States	2004-03-05	Female	8254	Verified	2014-03-18	27	vosnesenskii !	Website
	1099	bee	754	pensylvanicus	American bumble bee	California	United States	2004-08-25	Male	8254	Verified	2014-03-19	27	sp.	Website
	1100	bee	755	vagans	Half-black bumble bee	Minnesota	United States	2013-08-21	Female	7300	Verified	2014-03-27	27	vagans !	Website
	1101	bee	756	melanopygus	Black-tailed bumble bee	Oregon	United States	2014-03-18	Female	3580	Verified	2014-03-27	27	huntii	Website
	1102	bee	757	Unknown	Not a bumble bee	California	United States	2014-03-20	Male	7806	Invalid	2014-03-27	27	sp.	Website
	1103	bee	758	Unknown	Not a bumble bee	California	United States	2014-03-20	Male	7806	Invalid	2014-03-27	27	sp.	Website
	1104	bee	759	griseocollis	Brown-belted bumble bee	South Carolina	United States	2013-07-21	Male	8050	Verified	2017-12-01	27	bimaculatus	Website
	1105	bee	760	impatiens	Common eastern bumble bee	South Carolina	United States	2013-10-12	Female	8050	Verified	2017-12-01	27	griseocollis	Website
	1106	bee	761	Unknown	Not a bumble bee	Ohio	United States	2013-07-06	Female	908	Invalid	2017-12-01	27	sp.	Website
	1107	bee	762	Unknown	Not a bumble bee	Vermont	United States	2013-08-09	Female	908	Invalid	2017-12-01	27	rufocinctus	Website
	1108	bee	763	Unknown	Not a bumble bee	Ohio	United States	2013-07-04	Female	908	Invalid	2017-12-01	27	vagans	Website
	1109	bee	765	Unknown	Not a bumble bee	Washington	United States	2014-03-20	Female	5861	Invalid	2014-03-27	27	sp.	Website
	1110	bee	766	sp.	Bumble bee	Washington	United States	2014-03-18	Female	8047	Verified	2014-03-27	27	rufocinctus	Website
	1111	bee	767	Unknown	Not a bumble bee	Georgia	United States	2014-03-20	Male	6212	Invalid	2014-03-27	27	sp.	Website
	1112	bee	768	huntii	Hunt's bumble bee	California	United States	2014-03-21	Female	4806	Verified	2014-03-27	27	huntii !	Website
	1113	bee	769	melanopygus	Black-tailed bumble bee	Washington	United States	2014-03-21	Female	7951	Verified	2014-03-27	27	melanopygus !	Website
	1114	bee	770	griseocollis	Brown-belted bumble bee	South Carolina	United States	2008-07-03	Male	8050	Verified	2014-03-27	27	griseocollis !	Website
	1115	bee	771	sp.	Bumble bee	California	United States	2014-03-20	Female	535	Verified	2014-03-27	27	sp. !	Website
	1116	bee	772	impatiens	Common eastern bumble bee	Maine	United States	2011-08-01	Female	579	Verified	2014-03-27	27	impatiens !	Website
	1117	bee	773	sitkensis	Sitka bumble bee	California	United States	2014-03-22	Female	535	Verified	2014-03-27	27	sp.	Website
	1118	bee	774	vosnesenskii	Yellow-faced bumble bee	Washington	United States	2014-03-22	Female	7723	Verified	2014-03-27	27	vosnesenskii !	Website
	1119	bee	775	melanopygus	Black-tailed bumble bee	Washington	United States	2014-03-22	Female	7723	Verified	2014-03-27	27	melanopygus !	Website
	1120	bee	776	vosnesenskii	Yellow-faced bumble bee	Oregon	United States	2014-03-22	Female	32	Verified	2014-03-27	27	vosnesenskii !	Website
	1121	bee	777	mixtus	Fuzzy-horned bumble bee	Oregon	United States	2014-03-22	Female	4008	Verified	2014-03-27	27	mixtus !	Website
	1122	bee	778	Unknown	Not a bumble bee	California	United States	2014-03-22	Female	6997	Invalid	2014-03-27	27	vosnesenskii	Website
	1123	bee	779	sp.	Bumble bee	Connecticut	United States	2013-07-27	Male	6808	Verified	2014-03-27	27	sp. !	Website
	1124	bee	780	impatiens	Common eastern bumble bee	Rhode Island	United States	2011-04-24	Male	6808	Verified	2014-03-27	27	impatiens !	Website
	1125	bee	781	Unknown	Not a bumble bee	California	United States	2014-03-15	Male	5616	Invalid	2014-03-27	27	sp.	Website
	1126	bee	782	huntii	Hunt's bumble bee	Washington	United States	2014-03-22	Female	74	Verified	2014-03-27	27	huntii !	Website
	1127	bee	783	crotchii	Crotch bumble bee	California	United States	2014-03-22	Female	5791	Verified	2014-03-27	27	crotchii !	Website
	1128	bee	784	vosnesenskii	Yellow-faced bumble bee	California	United States	2010-07-27	Female	8254	Verified	2014-03-27	27	vosnesenskii !	Website
	1129	bee	785	Unknown	Not a bumble bee	California	United States	2014-03-22	Male	4957	Invalid	2014-03-27	27	sp.	Website
	1130	bee	786	vosnesenskii	Yellow-faced bumble bee	California	United States	2007-07-06	Female	8254	Verified	2014-03-27	27	vosnesenskii !	Website
	1131	bee	787	Unknown	Not a bumble bee	South Carolina	United States	2010-10-23	Male	8050	Invalid	2014-03-27	27	griseocollis	Website
	1132	bee	788	Unknown	Not a bumble bee	Georgia	United States	2014-03-23	Male	7403	Invalid	2014-03-27	27	sp.	Website
	1133	bee	789	melanopygus	Black-tailed bumble bee	British Columbia	Canada	2014-03-24	Female	7138	Verified	2014-03-27	27	melanopygus !	Website
	1134	bee	790	vosnesenskii	Yellow-faced bumble bee	California	United States	2014-03-23	Female	4016	Verified	2014-03-27	27	vosnesenskii !	Website
	1135	bee	791	Unknown	Not a bumble bee	Florida	United States	2014-03-08	Female	2257	Invalid	2017-12-01	27	sp.	Website
	1136	bee	792	Unknown	Not a bumble bee	Nevada	United States	2014-03-16	Female	2268	Invalid	2014-04-21	21	sp.	Website
	1137	bee	793	Unknown	Not a bumble bee	California	United States	2014-03-24	Male	7342	Invalid	2014-03-27	27	sp.	Website
	1138	bee	794	Unknown	Not a bumble bee	California	United States	2014-03-24	Female	7342	Invalid	2014-03-27	27	vosnesenskii	Website
	1139	bee	795	melanopygus	Black-tailed bumble bee	Washington	United States	2014-03-24	Female	2416	Verified	2014-03-27	27	melanopygus !	Website
	1140	bee	796	terricola	Yellow-banded bumble bee	Maine	United States	2012-08-02	Male	244	Verified	2014-03-27	27	terricola !	Website
	1141	bee	797	borealis	Northern amber bumble bee	Maine	United States	2013-06-02	Female	244	Verified	2014-03-27	27	borealis !	Website
	1142	bee	798	Unknown	Not a bumble bee	British Columbia	Canada	2014-03-13	Male	1385	Invalid	2014-03-27	27	melanopygus	Website
	1143	bee	800	Unknown	Not a bumble bee	California	United States	2014-03-01	Male	3970	Invalid	2014-03-27	27	sp.	Website
	1144	bee	801	impatiens	Common eastern bumble bee	South Carolina	United States	2014-03-23	Male	2384	Verified	2014-03-27	27	variabilis	Website
	1145	bee	802	bimaculatus	Two-spotted bumble bee	Pennsylvania	United States	2013-07-04	Female	5241	Verified	2014-03-27	27	bimaculatus !	Website
	1146	bee	803	impatiens	Common eastern bumble bee	Connecticut	United States	2013-10-15	Female	7839	Verified	2014-03-27	27	impatiens !	Website
	1147	bee	804	melanopygus	Black-tailed bumble bee	Washington	United States	2014-03-26	Female	5700	Verified	2014-03-27	27	melanopygus !	Website
	1148	bee	805	ternarius	Tri-colored bumble bee	Michigan	United States	2013-06-14	Female	7750	Verified	2014-03-28	27	ternarius !	Website
	1149	bee	806	vagans, sandersoni or perplexus	Two-yellow striped group	Michigan	United States	2013-06-14	Female	7750	Verified	2017-12-01	27	vagans	Website
	1150	bee	808	impatiens	Common eastern bumble bee	Pennsylvania	United States	2013-07-24	Female	8153	Verified	2014-03-28	27	impatiens !	Website
	1151	bee	809	Unknown	Not a bumble bee	California	United States	2013-06-14	Male	6851	Invalid	2014-03-31	27	sp.	Website
	1152	bee	810	Unknown	Not a bumble bee	Georgia	United States	2014-03-21	Male	8149	Invalid	2014-03-31	27	sp.	Website
	1153	bee	811	vosnesenskii	Yellow-faced bumble bee	California	United States	2014-03-29	Female	535	Verified	2014-03-31	27	vosnesenskii !	Website
	1154	bee	812	huntii	Hunt's bumble bee	Colorado	United States	2014-03-30	Female	7181	Verified	2014-03-31	27	huntii !	Website
	1155	bee	813	Unknown	Not a bumble bee	South Carolina	United States	2014-03-30	Male	2384	Invalid	2014-03-31	27	sp.	Website
	1156	bee	814	vosnesenskii	Yellow-faced bumble bee	Washington	United States	2013-08-15	Male	5755	Verified	2014-03-31	27	vosnesenskii !	Website
	1157	bee	817	melanopygus	Black-tailed bumble bee	Washington	United States	2013-08-08	Female	2102	Verified	2014-04-02	27	rufocinctus	Website
	1158	bee	818	flavifrons	Yellow head bumble bee	Washington	United States	2013-07-08	Male	2102	Verified	2014-04-02	27	occidentalis	Website
	1159	bee	819	flavifrons	Yellow head bumble bee	Washington	United States	2013-07-10	Male	2102	Verified	2014-04-02	27	occidentalis	Website
	1160	bee	820	vosnesenskii or caliginosus	Yellow-faced group	Washington	United States	2013-07-10	Female	2102	Verified	2015-05-01	27	vosnesenskii or caliginosus !	Website
	1161	bee	822	vosnesenskii	Yellow-faced bumble bee	Washington	United States	2013-08-04	Male	2102	Verified	2014-04-02	27	vosnesenskii !	Website
	1162	bee	823	sp.	Bumble bee	Washington	United States	2013-08-08	Male	2102	Verified	2014-04-02	27	sp. !	Website
	1163	bee	824	vosnesenskii	Yellow-faced bumble bee	Washington	United States	2013-08-13	Male	2102	Verified	2014-04-02	27	vosnesenskii !	Website
	1164	bee	827	flavifrons	Yellow head bumble bee	Oregon	United States	2014-03-30	Female	1127	Verified	2014-04-02	27	flavifrons !	Website
	1165	bee	829	Unknown	Not a bumble bee	British Columbia	Canada	2014-04-01	Male	4972	Invalid	2014-04-02	27	sp.	Website
	1166	bee	830	griseocollis	Brown-belted bumble bee	Alberta	Canada	2008-09-08	Male	2856	Verified	2014-04-02	27	griseocollis !	Website
	1167	bee	831	bifarius	Two-form bumble bee	British Columbia	Canada	2014-03-24	Male	2856	Verified	2014-04-02	27	bifarius !	Website
	1168	bee	832	impatiens	Common eastern bumble bee	New York	United States	2013-09-10	Male	4861	Verified	2014-04-02	27	affinis	Website
	1169	bee	834	sp.	Bumble bee	California	United States	2014-04-02	Male	2067	Verified	2014-09-29	8	occidentalis	Website
	1170	bee	835	vosnesenskii or caliginosus	Yellow-faced group	Oregon	United States	2014-04-02	Female	6903	Verified	2017-11-15	25	fervidus	Website
	1171	bee	836	sp.	Bumble bee	California	United States	2014-04-02	Male	6184	Verified	2014-04-04	27	occidentalis	Website
	1172	bee	837	impatiens	Common eastern bumble bee	Pennsylvania	United States	2013-08-21	Female	7569	Verified	2017-12-01	27	sp.	Website
	1173	bee	838	fervidus	Yellow bumble bee	Maine	United States	2012-07-17	Female	244	Verified	2017-12-01	27	pensylvanicus	Website
	1174	bee	839	terricola	Yellow-banded bumble bee	Maine	United States	2012-07-23	Female	244	Verified	2014-04-04	27	terricola !	Website
	1175	bee	841	vagans, sandersoni or perplexus	Two-yellow striped group	Maine	United States	2012-09-01	Female	244	Verified	2017-12-01	27	vagans	Website
	1176	bee	842	perplexus	Confusing bumble bee	Maine	United States	2013-07-31	Male	244	Verified	2014-04-04	27	perplexus !	Website
	1177	bee	843	vagans, sandersoni or perplexus	Two-yellow striped group	Maine	United States	2013-07-31	Female	244	Verified	2017-12-01	27	vagans	Website
	1178	bee	844	frigidus	Bombus frigidus	Maine	United States	2012-10-08	Male	244	Verified	2017-12-04	27	frigidus	Website
	1179	bee	845	terricola	Yellow-banded bumble bee	Maine	United States	2012-07-01	Female	244	Verified	2014-04-04	27	terricola !	Website
	1180	bee	846	sp.	Bumble bee	Maine	United States	2013-07-17	Female	244	Verified	2017-12-01	27	sp.	Website
	1181	bee	847	sp.	Bumble bee	Maine	United States	2013-07-31	Female	244	Verified	2017-12-01	27	rufocinctus	Website
	1182	bee	848	perplexus	Confusing bumble bee	Maine	United States	2013-07-31	Female	244	Verified	2017-12-01	27	perplexus	Website
	1183	bee	849	sp.	Bumble bee	Maine	United States	2013-08-01	Female	244	Verified	2017-12-01	27	rufocinctus	Website
	1184	bee	850	affinis	Rusty-patched bumble bee	Maine	United States	2005-07-15	Female	244	Verified	2014-04-04	27	affinis !	Website
	1185	bee	851	perplexus	Confusing bumble bee	Maine	United States	2012-07-17	Male	244	Verified	2014-04-04	27	perplexus !	Website
	1186	bee	852	Unknown	Not a bumble bee	Texas	United States	2014-04-02	Male	3876	Invalid	2014-04-04	27	sp.	Website
	1187	bee	853	vosnesenskii	Yellow-faced bumble bee	Washington	United States	2014-04-04	Not Determined	2033	Verified	2017-09-13	25	insularis	Website
	1188	bee	854	melanopygus	Black-tailed bumble bee	Washington	United States	2014-03-14	Female	2333	Verified	2017-09-25	25	kirbiellus	Website
	1189	bee	855	melanopygus	Black-tailed bumble bee	Washington	United States	2014-03-14	Female	2333	Verified	2017-09-25	25	rufocinctus	Website
	1190	bee	856	pensylvanicus	American bumble bee	Florida	United States	2014-04-05	Female	7996	Verified	2017-12-01	27	pensylvanicus	Website
	1191	bee	857	vosnesenskii	Yellow-faced bumble bee	California	United States	2014-04-05	Female	1588	Verified	2017-12-01	27	sp.	Website
	1192	bee	858	Unknown	Not a bumble bee	Utah	United States	2013-06-03	Male	7965	Invalid	2014-04-14	30	sp.	Website
	1193	bee	859	vosnesenskii	Yellow-faced bumble bee	California	United States	2014-04-03	Female	4656	Verified	2015-02-26	27	vosnesenskii !	Website
	1194	bee	860	fervidus	Yellow bumble bee	Utah	United States	2013-08-25	Female	7965	Verified	2015-05-08	27	fervidus !	Website
	1195	bee	861	Unknown	Not a bumble bee	North Carolina	United States	2014-04-05	Male	6909	Invalid	2014-05-27	30	affinis	Website
	1196	bee	862	vosnesenskii	Yellow-faced bumble bee	California	United States	2014-03-22	Female	798	Verified	2017-12-01	27	sp.	Website
	1197	bee	863	crotchii	Crotch bumble bee	California	United States	2014-04-06	Female	4656	Verified	2015-02-26	27	crotchii !	Website
	1198	bee	864	vosnesenskii or caliginosus	Yellow-faced group	California	United States	2014-03-21	Female	798	Verified	2015-02-26	27	vosnesenskii or caliginosus !	Website
	1199	bee	865	vosnesenskii	Yellow-faced bumble bee	California	United States	2014-04-06	Female	4656	Verified	2017-12-01	27	caliginosus	Website
	1200	bee	866	vosnesenskii	Yellow-faced bumble bee	Washington	United States	2014-04-06	Female	713	Tentative	2017-09-25	25	insularis	Website
	1201	bee	868	bimaculatus	Two-spotted bumble bee	Virginia	United States	2012-06-12	Male	239	Verified	2017-12-01	27	bimaculatus	Website
	1202	bee	869	bimaculatus	Two-spotted bumble bee	Virginia	United States	2012-06-12	Male	239	Verified	2017-12-01	27	bimaculatus	Website
	1203	bee	870	bimaculatus	Two-spotted bumble bee	Virginia	United States	2012-06-14	Male	239	Verified	2014-04-14	30	bimaculatus !	Website
	1204	bee	871	bimaculatus	Two-spotted bumble bee	Virginia	United States	2012-06-14	Male	239	Verified	2014-04-14	30	bimaculatus !	Website
	1205	bee	872	griseocollis	Brown-belted bumble bee	Virginia	United States	2012-06-17	Male	239	Verified	2014-04-14	30	griseocollis !	Website
	1206	bee	873	bimaculatus	Two-spotted bumble bee	Virginia	United States	2012-06-08	Male	239	Verified	2014-04-14	30	bimaculatus !	Website
	1207	bee	874	griseocollis	Brown-belted bumble bee	Virginia	United States	2011-06-10	Female	239	Verified	2014-04-14	30	griseocollis !	Website
	1208	bee	875	vosnesenskii or caliginosus	Yellow-faced group	Washington	United States	2014-04-07	Not Determined	4898	Verified	2017-09-13	25	flavidus	Website
	1209	bee	876	melanopygus	Black-tailed bumble bee	California	United States	2014-04-07	Male	4656	Verified	2014-09-29	8	occidentalis	Website
	1210	bee	877	sp.	Bumble bee	California	United States	2014-04-07	Female	535	Verified	2017-12-01	27	sp.	Website
	1211	bee	878	melanopygus	Black-tailed bumble bee	Washington	United States	2013-05-16	Female	7186	Verified	2014-11-07	8	melanopygus !	Website
	1212	bee	879	melanopygus	Black-tailed bumble bee	Washington	United States	2013-07-31	Female	7186	Verified	2014-11-07	8	melanopygus !	Website
	1213	bee	880	griseocollis	Brown-belted bumble bee	Virginia	United States	2012-05-11	Female	239	Verified	2014-04-14	30	griseocollis !	Website
	1214	bee	881	griseocollis	Brown-belted bumble bee	Virginia	United States	2012-06-11	Female	239	Verified	2014-04-14	30	griseocollis !	Website
	1215	bee	882	melanopygus	Black-tailed bumble bee	California	United States	2014-04-06	Female	6910	Verified	2017-12-01	27	melanopygus	Website
	1216	bee	883	vosnesenskii	Yellow-faced bumble bee	California	United States	2014-04-08	Female	535	Verified	2017-12-01	27	sp.	Website
	1217	bee	884	Unknown	Not a bumble bee	California	United States	2014-04-08	Male	4721	Invalid	2017-12-01	27	sp.	Website
	1218	bee	885	vosnesenskii	Yellow-faced bumble bee	British Columbia	Canada	2014-04-08	Female	8262	Verified	2017-12-01	27	vosnesenskii	Website
	1219	bee	886	sp.	Bumble bee	British Columbia	Canada	2014-04-08	Female	8262	Verified	2015-02-05	27	sp. !	Website
	1220	bee	887	Unknown	Not a bumble bee	Oregon	United States	2014-04-09	Not Determined	6016	Invalid	2017-11-29	25	fervidus	Website
	1221	bee	888	vosnesenskii	Yellow-faced bumble bee	Oregon	United States	2014-04-09	Female	6016	Verified	2017-11-15	25	fervidus	Website
	1222	bee	889	bifarius	Two-form bumble bee	Washington	United States	2014-04-08	Female	4099	Tentative	2017-09-25	25	sp.	Website
	1223	bee	890	Unknown	Not a bumble bee	California	United States	2014-04-09	Male	4721	Invalid	2014-04-14	30	sp.	Website
	1224	bee	891	bimaculatus	Two-spotted bumble bee	Tennessee	United States	2014-04-09	Female	7696	Verified	2014-04-14	30	bimaculatus !	Website
	1225	bee	892	flavifrons	Yellow head bumble bee	Oregon	United States	2014-04-09	Female	4008	Verified	2017-11-16	25	flavifrons	Website
	1226	bee	893	Unknown	Not a bumble bee	California	United States	2014-04-09	Male	3751	Invalid	2014-04-14	30	sp.	Website
	1227	bee	894	vosnesenskii	Yellow-faced bumble bee	British Columbia	Canada	2014-04-09	Male	956	Verified	2014-09-29	8	occidentalis	Website
	1228	bee	895	Unknown	Not a bumble bee	Idaho	United States	2014-04-09	Female	3853	Invalid	2017-08-09	27	sp.	Website
	1229	bee	896	Unknown	Not a bumble bee	North Carolina	United States	2014-04-10	Male	532	Invalid	2014-09-08	8	sp.	Website
	1230	bee	897	impatiens	Common eastern bumble bee	Indiana	United States	2014-04-10	Male	6308	Verified	2014-04-14	30	impatiens !	Website
	1231	bee	898	perplexus	Confusing bumble bee	Maine	United States	2011-08-09	Male	244	Verified	2014-07-10	23	perplexus !	Website
	1232	bee	899	bimaculatus	Two-spotted bumble bee	Maine	United States	2012-07-17	Male	244	Verified	2014-04-12	27	sp.	Website
	1233	bee	900	Unknown	Not a bumble bee	Kentucky	United States	2014-04-10	Male	447	Invalid	2014-04-12	27	pensylvanicus	Website
	1234	bee	901	huntii	Hunt's bumble bee	Oregon	United States	2014-04-06	Female	7022	Verified	2014-04-12	27	huntii !	Website
	1235	bee	902	impatiens	Common eastern bumble bee	Louisiana	United States	2014-04-11	Female	6981	Verified	2014-04-12	27	griseocollis	Website
	1236	bee	903	impatiens	Common eastern bumble bee	Pennsylvania	United States	2014-04-10	Female	4786	Verified	2014-04-12	27	impatiens !	Website
	1237	bee	904	griseocollis	Brown-belted bumble bee	Maine	United States	2013-07-18	Male	244	Verified	2014-04-12	27	sp.	Website
	1238	bee	905	flavifrons	Yellow head bumble bee	California	United States	2014-04-11	Female	535	Verified	2014-04-12	27	flavifrons !	Website
	1239	bee	906	vosnesenskii or caliginosus	Yellow-faced group	California	United States	2014-04-11	Female	535	Verified	2015-05-01	27	vosnesenskii or caliginosus !	Website
	1240	bee	907	sp.	Bumble bee	Kansas	United States	2014-04-11	Male	7709	Verified	2014-04-12	27	bimaculatus	Website
	1241	bee	908	sp.	Bumble bee	Texas	United States	2013-08-09	Male	8377	Verified	2014-04-12	27	sp. !	Website
	1242	bee	909	impatiens	Common eastern bumble bee	Virginia	United States	2012-07-23	Male	239	Verified	2014-04-12	27	impatiens !	Website
	1243	bee	910	griseocollis	Brown-belted bumble bee	Virginia	United States	2012-06-13	Male	239	Verified	2014-04-12	27	griseocollis !	Website
	1244	bee	911	Unknown	Not a bumble bee	Indiana	United States	2014-04-12	Male	6308	Invalid	2014-04-16	27	rufocinctus	Website
	1245	bee	912	bifarius	Two-form bumble bee	Idaho	United States	2014-04-10	Female	6946	Verified	2014-04-16	27	bifarius !	Website
	1246	bee	913	ternarius	Tri-colored bumble bee	New York	United States	2014-04-12	Male	494	Verified	2014-04-14	30	ternarius !	Website
	1247	bee	914	bimaculatus	Two-spotted bumble bee	Virginia	United States	2014-04-12	Female	239	Verified	2014-04-14	30	bimaculatus !	Website
	1248	bee	915	impatiens	Common eastern bumble bee	Virginia	United States	2014-04-11	Female	239	Verified	2014-04-14	30	impatiens !	Website
	1249	bee	916	bifarius	Two-form bumble bee	British Columbia	Canada	2014-04-12	Female	3402	Verified	2014-04-16	27	bifarius !	Website
	1250	bee	917	sp.	Bumble bee	Virginia	United States	2014-04-12	Female	4462	Verified	2014-04-16	27	sp. !	Website
	1251	bee	918	sp.	Bumble bee	Virginia	United States	2014-04-12	Male	4462	Verified	2014-04-16	27	sp. !	Website
	1252	bee	920	Unknown	Not a bumble bee	Florida	United States	2014-04-13	Male	5221	Invalid	2014-04-14	30	sp.	Website
	1253	bee	921	sp.	Bumble bee	Montana	United States	2013-07-02	Female	7799	Verified	2014-04-16	27	sp. !	Website
	1254	bee	922	Unknown	Not a bumble bee	South Carolina	United States	2014-04-13	Female	8198	Invalid	2014-04-14	30	impatiens	Website
	1255	bee	923	flavifrons	Yellow head bumble bee	Oregon	United States	2014-04-13	Female	4008	Verified	2014-04-16	27	flavifrons !	Website
	1256	bee	924	Unknown	Not a bumble bee	Louisiana	United States	2014-04-13	Male	6981	Invalid	2014-04-14	30	impatiens	Website
	1257	bee	925	melanopygus	Black-tailed bumble bee	Oregon	United States	2014-04-13	Female	4008	Verified	2014-04-16	27	melanopygus !	Website
	1258	bee	926	Unknown	Not a bumble bee	Ohio	United States	2014-04-13	Male	1961	Invalid	2014-04-14	30	sp.	Website
	1259	bee	927	sp.	Bumble bee	Washington	United States	2014-04-13	Female	1930	Verified	2014-04-16	27	sp. !	Website
	1260	bee	928	vosnesenskii	Yellow-faced bumble bee	Washington	United States	2014-04-13	Female	1319	Verified	2014-04-16	27	vosnesenskii !	Website
	1261	bee	929	occidentalis	Western bumble bee	British Columbia	Canada	2014-04-11	Female	875	Verified	2014-04-16	27	occidentalis !	Website
	1262	bee	930	huntii	Hunt's bumble bee	British Columbia	Canada	2014-04-11	Female	875	Verified	2014-04-16	27	centralis	Website
	1263	bee	932	Unknown	Not a bumble bee	New Jersey	United States	2014-04-13	Male	4067	Invalid	2014-04-14	30	sp.	Website
	1264	bee	937	Unknown	Not a bumble bee	Washington	United States	2014-04-13	Male	2333	Invalid	2014-04-16	27	sp.	Website
	1265	bee	938	flavifrons	Yellow head bumble bee	British Columbia	Canada	2014-04-13	Female	8294	Verified	2014-04-16	27	flavifrons !	Website
	1266	bee	939	sp.	Bumble bee	Washington	United States	2014-04-13	Female	8144	Verified	2014-04-16	27	sp. !	Website
	1267	bee	940	melanopygus	Black-tailed bumble bee	California	United States	2014-04-12	Female	1784	Verified	2014-04-16	27	occidentalis	Website
	1268	bee	941	melanopygus	Black-tailed bumble bee	British Columbia	Canada	2014-04-13	Female	3402	Verified	2014-04-16	27	melanopygus !	Website
	1269	bee	943	Unknown	Not a bumble bee	New York	United States	2013-07-26	Male	3436	Invalid	2014-04-14	30	sp.	Website
	1270	bee	945	vosnesenskii	Yellow-faced bumble bee	Washington	United States	2014-04-13	Female	25	Verified	2014-04-16	27	fervidus	Website
	1271	bee	946	vosnesenskii	Yellow-faced bumble bee	Oregon	United States	2014-04-13	Female	5707	Verified	2014-04-16	27	caliginosus	Website
	1272	bee	947	Unknown	Not a bumble bee	Massachusetts	United States	2014-04-14	Male	7656	Invalid	2014-04-14	30	sp.	Website
	1273	bee	948	bimaculatus	Two-spotted bumble bee	Virginia	United States	2014-04-02	Female	4166	Verified	2014-04-14	30	bimaculatus !	Website
	1274	bee	950	bimaculatus	Two-spotted bumble bee	Connecticut	United States	2014-04-12	Female	679	Verified	2017-12-01	27	impatiens	Website
	1275	bee	951	melanopygus	Black-tailed bumble bee	Oregon	United States	2014-03-11	Female	1870	Verified	2014-04-16	27	melanopygus !	Website
	1276	bee	952	Unknown	Not a bumble bee	South Carolina	United States	2014-04-14	Male	2806	Invalid	2014-04-16	27	sp.	Website
	1277	bee	953	pensylvanicus	American bumble bee	Nevada	United States	2012-12-06	Female	3506	Verified	2014-04-16	27	sp.	Website
	1278	bee	955	sp.	Bumble bee	Idaho	United States	2014-04-14	Female	3241	Verified	2014-04-16	27	melanopygus	Website
	1279	bee	956	centralis	Central bumble bee	Idaho	United States	2014-04-14	Female	1758	Verified	2017-08-09	27	centralis	Website
	1280	bee	957	impatiens	Common eastern bumble bee	Virginia	United States	2014-04-11	Female	4517	Verified	2014-04-16	27	impatiens !	Website
	1281	bee	958	impatiens	Common eastern bumble bee	Virginia	United States	2014-04-14	Female	4600	Verified	2014-04-16	27	affinis	Website
	1282	bee	959	sp.	Bumble bee	Idaho	United States	2014-04-14	Male	5535	Verified	2014-04-16	27	sp. !	Website
	1283	bee	960	melanopygus	Black-tailed bumble bee	California	United States	2014-04-14	Female	6910	Verified	2014-04-16	27	sp.	Website
	1284	bee	961	vosnesenskii	Yellow-faced bumble bee	California	United States	2014-04-14	Female	6910	Verified	2014-04-16	27	vosnesenskii !	Website
	1285	bee	962	bimaculatus	Two-spotted bumble bee	Missouri	United States	2014-04-16	Female	8443	Verified	2014-04-16	27	vagans	Website
	1286	bee	964	sp.	Bumble bee	California	United States	2014-04-07	Female	880	Verified	2014-04-16	27	melanopygus	Website
	1287	bee	965	Unknown	Not a bumble bee	California	United States	2014-04-09	Male	880	Invalid	2014-04-16	27	sp.	Website
	1288	bee	966	Unknown	Not a bumble bee	California	United States	2014-04-10	Male	880	Invalid	2014-04-16	27	sp.	Website
	1289	bee	967	Unknown	Not a bumble bee	Oregon	United States	2014-04-16	Male	5446	Invalid	2014-04-16	27	sp.	Website
	1290	bee	970	Unknown	Not a bumble bee	Oregon	United States	2014-04-16	Male	8438	Invalid	2014-04-16	27	sp.	Website
	1291	bee	972	impatiens	Common eastern bumble bee	New York	United States	2014-04-12	Female	3669	Verified	2017-03-31	25	impatiens	Website
	1292	bee	973	vosnesenskii	Yellow-faced bumble bee	Oregon	United States	2014-04-15	Female	1202	Verified	2017-11-21	25	vosnesenskii	Website
	1293	bee	974	vosnesenskii	Yellow-faced bumble bee	California	United States	2014-04-11	Female	4239	Verified	2015-02-26	27	vosnesenskii !	Website
	1294	bee	975	huntii	Hunt's bumble bee	Idaho	United States	2014-04-16	Female	3241	Verified	2017-08-09	27	sp.	Website
	1295	bee	976	melanopygus	Black-tailed bumble bee	Oregon	United States	2013-05-27	Female	4692	Verified	2015-02-05	27	melanopygus !	Website
	1296	bee	977	sp.	Bumble bee	New York	United States	2013-07-03	Not Determined	4692	Verified	2015-11-30	27	sp. !	Website
	1297	bee	978	Unknown	Not a bumble bee	Indiana	United States	2014-04-04	Male	7614	Invalid	2014-09-08	8	sp.	Website
	1298	bee	979	griseocollis	Brown-belted bumble bee	Indiana	United States	2014-04-17	Female	7614	Verified	2016-02-21	14	griseocollis !	Website
	1299	bee	980	vosnesenskii	Yellow-faced bumble bee	British Columbia	Canada	2014-04-06	Female	7249	Verified	2017-12-01	27	vosnesenskii	Website
	1300	bee	981	melanopygus	Black-tailed bumble bee	California	United States	2014-04-17	Male	5427	Verified	2014-09-29	8	occidentalis	Website
	1301	bee	983	impatiens	Common eastern bumble bee	Michigan	United States	2014-04-17	Female	1165	Verified	2016-01-09	14	impatiens !	Website
	1302	bee	984	vosnesenskii	Yellow-faced bumble bee	Oregon	United States	2014-04-17	Female	7324	Verified	2015-02-09	27	vosnesenskii !	Website
	1303	bee	985	bimaculatus	Two-spotted bumble bee	Wisconsin	United States	2010-08-30	Female	1027	Verified	2017-12-01	27	sp.	Website
	1304	bee	988	vosnesenskii	Yellow-faced bumble bee	California	United States	2014-04-13	Female	8027	Verified	2015-06-27	27	vosnesenskii !	Website
	1305	bee	989	sp.	Bumble bee	California	United States	2014-04-18	Female	7134	Verified	2017-12-01	27	sp.	Website
	1306	bee	990	sp.	Bumble bee	Ohio	United States	2014-04-17	Female	8036	Verified	2017-12-01	27	variabilis	Website
	1307	bee	991	Unknown	Not a bumble bee	Connecticut	United States	2014-04-18	Male	7778	Invalid	2014-09-15	8	sp.	Website
	1308	bee	992	Unknown	Not a bumble bee	Alabama	United States	2014-04-17	Male	7279	Invalid	2014-04-23	30	sp.	Website
	1309	bee	993	Unknown	Not a bumble bee	Pennsylvania	United States	2014-04-18	Male	8112	Invalid	2014-04-23	30	sp.	Website
	1310	bee	994	impatiens	Common eastern bumble bee	Oklahoma	United States	2014-04-16	Female	6000	Verified	2014-04-23	30	impatiens !	Website
	1311	bee	995	Unknown	Not a bumble bee	California	United States	2014-04-16	Male	7260	Invalid	2014-09-08	8	sp.	Website
	1312	bee	996	Unknown	Not a bumble bee	Oregon	United States	2014-04-18	Male	1253	Invalid	2014-04-24	27	sp.	Website
	1313	bee	997	mixtus	Fuzzy-horned bumble bee	Oregon	United States	2014-04-18	Female	1039	Verified	2014-04-24	27	mixtus !	Website
	1314	bee	998	vosnesenskii	Yellow-faced bumble bee	Oregon	United States	2014-04-09	Female	737	Verified	2014-04-24	27	vosnesenskii !	Website
	1315	bee	999	sp.	Bumble bee	Oregon	United States	2014-04-11	Female	737	Verified	2014-04-24	27	sp. !	Website
	1316	bee	1002	pensylvanicus	American bumble bee	Florida	United States	2014-04-04	Female	4629	Verified	2014-04-24	27	pensylvanicus !	Website
	1317	bee	1003	sp.	Bumble bee	California	United States	2014-04-18	Female	7004	Verified	2014-04-24	27	sp. !	Website
	1318	bee	1004	vosnesenskii	Yellow-faced bumble bee	Oregon	United States	2014-04-18	Female	1870	Verified	2014-04-24	27	vosnesenskii !	Website
	1319	bee	1005	melanopygus	Black-tailed bumble bee	Oregon	United States	2014-04-18	Female	1870	Verified	2014-04-24	27	melanopygus !	Website
	1320	bee	1006	vagans, sandersoni or perplexus	Two-yellow striped group	Pennsylvania	United States	2014-04-19	Female	5352	Verified	2017-12-01	27	vagans	Website
	1321	bee	1007	impatiens	Common eastern bumble bee	Pennsylvania	United States	2014-04-19	Female	5352	Verified	2014-04-24	27	impatiens !	Website
	1322	bee	1008	Unknown	Not a bumble bee	Pennsylvania	United States	2014-04-19	Male	5352	Invalid	2014-04-23	30	sp.	Website
	1323	bee	1009	impatiens	Common eastern bumble bee	Pennsylvania	United States	2014-04-19	Female	5352	Verified	2014-04-24	27	impatiens !	Website
	1324	bee	1010	bimaculatus	Two-spotted bumble bee	New York	United States	2014-04-17	Female	540	Verified	2015-11-30	27	bimaculatus !	Website
	1325	bee	1011	melanopygus	Black-tailed bumble bee	British Columbia	Canada	2014-04-18	Female	2774	Verified	2014-04-24	27	sp.	Website
	1326	bee	1012	Unknown	Not a bumble bee	Maryland	United States	2014-04-19	Male	43	Invalid	2014-04-24	27	griseocollis	Website
	1327	bee	1013	impatiens	Common eastern bumble bee	Virginia	United States	2014-04-19	Female	7204	Verified	2014-04-24	27	bimaculatus	Website
	1328	bee	1014	Unknown	Not a bumble bee	Indiana	United States	2014-04-19	Male	4893	Invalid	2014-04-24	27	griseocollis	Website
	1329	bee	1016	Unknown	Not a bumble bee	California	United States	2014-04-19	Male	7025	Invalid	2014-04-24	27	sp.	Website
	1330	bee	1017	vosnesenskii	Yellow-faced bumble bee	Oregon	United States	2014-04-19	Female	2678	Verified	2014-04-21	21	vosnesenskii !	Website
	1331	bee	1018	pensylvanicus	American bumble bee	Texas	United States	2014-04-19	Female	1161	Verified	2014-04-24	27	pensylvanicus !	Website
	1332	bee	1019	pensylvanicus	American bumble bee	Texas	United States	2013-08-13	Female	7891	Verified	2014-04-24	27	pensylvanicus !	Website
	1333	bee	1020	pensylvanicus	American bumble bee	Texas	United States	2013-08-27	Male	7891	Verified	2014-04-24	27	sp.	Website
	1334	bee	1021	perplexus	Confusing bumble bee	Pennsylvania	United States	2014-04-19	Female	4786	Verified	2017-12-01	27	vagans	Website
	1335	bee	1022	vosnesenskii	Yellow-faced bumble bee	California	United States	2014-03-07	Female	3019	Verified	2014-04-24	27	vosnesenskii !	Website
	1336	bee	1024	Unknown	Not a bumble bee	British Columbia	Canada	2014-04-06	Male	2483	Invalid	2014-04-24	27	sp.	Website
	1337	bee	1025	Unknown	Not a bumble bee	British Columbia	Canada	2014-04-13	Female	4839	Invalid	2017-12-01	27	sitkensis	Website
	1338	bee	1026	Unknown	Not a bumble bee	Virginia	United States	2014-04-20	Male	90	Invalid	2014-04-24	27	sp.	Website
	1339	bee	1027	impatiens	Common eastern bumble bee	Ontario	Canada	2014-04-20	Female	5021	Verified	2014-04-24	27	impatiens !	Website
	1340	bee	1028	huntii	Hunt's bumble bee	Wyoming	United States	2013-05-07	Female	6801	Verified	2014-04-24	27	huntii !	Website
	1341	bee	1029	griseocollis	Brown-belted bumble bee	Illinois	United States	2014-04-20	Female	8049	Verified	2017-12-01	27	griseocollis	Website
	1342	bee	1030	bimaculatus	Two-spotted bumble bee	Pennsylvania	United States	2014-04-20	Female	4181	Verified	2014-04-24	27	sp.	Website
	1343	bee	1031	impatiens	Common eastern bumble bee	New York	United States	2014-04-20	Female	4848	Verified	2014-04-23	30	impatiens !	Website
	1344	bee	1032	sp.	Bumble bee	British Columbia	Canada	2014-04-20	Female	6962	Verified	2014-04-24	27	sp. !	Website
	1345	bee	1033	bimaculatus	Two-spotted bumble bee	Michigan	United States	2014-04-20	Female	8288	Verified	2014-04-23	30	bimaculatus !	Website
	1346	bee	1034	huntii	Hunt's bumble bee	Oregon	United States	2014-04-20	Female	3277	Verified	2014-04-24	27	huntii !	Website
	1347	bee	1035	occidentalis	Western bumble bee	Oregon	United States	2014-04-20	Female	3277	Verified	2014-04-24	27	occidentalis !	Website
	1348	bee	1036	Unknown	Not a bumble bee	Tennessee	United States	2014-04-20	Male	7545	Invalid	2014-04-24	27	sp.	Website
	1349	bee	1037	impatiens	Common eastern bumble bee	Alabama	United States	2014-04-20	Female	7754	Verified	2014-04-24	27	impatiens !	Website
	1350	bee	1038	impatiens	Common eastern bumble bee	Ohio	United States	2014-04-20	Female	8399	Verified	2014-04-24	27	impatiens !	Website
	1351	bee	1039	sp.	Bumble bee	Washington	United States	2014-04-20	Female	4685	Verified	2014-04-24	27	melanopygus	Website
	1352	bee	1040	vosnesenskii	Yellow-faced bumble bee	Washington	United States	2014-03-24	Female	5861	Verified	2014-04-24	27	vosnesenskii !	Website
	1353	bee	1041	impatiens	Common eastern bumble bee	New York	United States	2014-04-20	Female	2172	Verified	2015-11-30	27	impatiens !	Website
	1354	bee	1042	vosnesenskii	Yellow-faced bumble bee	Washington	United States	2014-03-24	Female	5861	Verified	2014-04-24	27	vosnesenskii !	Website
	1355	bee	1043	Unknown	Not a bumble bee	Washington	United States	2014-04-02	Not Determined	5861	Invalid	2017-09-13	25	vosnesenskii	Website
	1356	bee	1044	Unknown	Not a bumble bee	Washington	United States	2014-04-20	Female	5861	Invalid	2014-04-24	27	vosnesenskii	Website
	1357	bee	1045	Unknown	Not a bumble bee	Washington	United States	2014-04-02	Not Determined	5861	Invalid	2017-09-13	25	vosnesenskii	Website
	1358	bee	1046	Unknown	Not a bumble bee	Washington	United States	2014-04-20	Female	5861	Invalid	2014-04-24	27	vosnesenskii	Website
	1359	bee	1047	sp.	Bumble bee	California	United States	2014-04-19	Female	8027	Verified	2014-04-24	27	sp. !	Website
	1360	bee	1048	sp.	Bumble bee	Oregon	United States	2014-04-19	Female	2050	Verified	2014-04-24	27	sp. !	Website
	1361	bee	1049	Unknown	Not a bumble bee	Oregon	United States	2014-04-19	Male	4741	Invalid	2014-04-24	27	sp.	Website
	1362	bee	1050	impatiens	Common eastern bumble bee	Michigan	United States	2014-04-21	Female	5114	Verified	2014-04-24	27	impatiens !	Website
	1363	bee	1052	Unknown	Not a bumble bee	Oregon	United States	2014-04-21	Female	7889	Invalid	2014-04-24	27	caliginosus	Website
	1364	bee	1054	Unknown	Not a bumble bee	Iowa	United States	2014-04-20	Male	2337	Invalid	2014-04-23	30	sp.	Website
	1365	bee	1055	sitkensis	Sitka bumble bee	California	United States	2014-04-21	Female	535	Verified	2014-04-24	27	sitkensis !	Website
	1366	bee	1057	flavifrons	Yellow head bumble bee	Washington	United States	2011-07-19	Female	8173	Verified	2014-04-24	27	sp.	Website
	1367	bee	1058	flavifrons	Yellow head bumble bee	Washington	United States	2011-07-19	Female	8173	Verified	2014-04-24	27	sp.	Website
	1368	bee	1059	Unknown	Not a bumble bee	Washington	United States	2011-07-19	Male	8173	Invalid	2014-04-24	27	sp.	Website
	1369	bee	1060	sp.	Bumble bee	Washington	United States	2014-04-04	Female	8173	Verified	2014-04-24	27	sp. !	Website
	1370	bee	1061	mixtus	Fuzzy-horned bumble bee	Washington	United States	2014-04-02	Female	8173	Verified	2014-04-24	27	mixtus !	Website
	1371	bee	1062	Unknown	Not a bumble bee	Texas	United States	2013-10-24	Male	7891	Invalid	2014-04-23	30	sp.	Website
	1372	bee	1063	Unknown	Not a bumble bee	Virginia	United States	2014-04-22	Male	7948	Invalid	2014-04-23	30	sp.	Website
	1373	bee	1064	impatiens	Common eastern bumble bee	Pennsylvania	United States	2014-04-21	Female	4786	Verified	2014-04-23	30	impatiens !	Website
	1374	bee	1065	melanopygus	Black-tailed bumble bee	Oregon	United States	2014-04-20	Female	4008	Verified	2014-04-24	27	melanopygus !	Website
	1375	bee	1066	vosnesenskii	Yellow-faced bumble bee	Oregon	United States	2014-04-20	Female	4008	Verified	2014-04-24	27	vosnesenskii !	Website
	1376	bee	1067	melanopygus	Black-tailed bumble bee	Oregon	United States	2014-04-21	Female	4008	Verified	2014-04-24	27	melanopygus !	Website
	1377	bee	1068	vosnesenskii	Yellow-faced bumble bee	Oregon	United States	2014-04-21	Female	4008	Verified	2014-04-24	27	vosnesenskii !	Website
	1378	bee	1069	huntii	Hunt's bumble bee	Idaho	United States	2013-09-22	Female	4784	Verified	2014-04-24	27	huntii !	Website
	1379	bee	1070	nevadensis	Nevada bumble bee	Idaho	United States	2013-09-22	Female	4784	Verified	2014-04-24	27	nevadensis !	Website
	1380	bee	1072	melanopygus	Black-tailed bumble bee	Oregon	United States	2014-04-20	Female	6195	Verified	2014-04-24	27	sp.	Website
	1381	bee	1073	melanopygus	Black-tailed bumble bee	Oregon	United States	2014-04-22	Female	6729	Verified	2014-04-24	27	centralis	Website
	1382	bee	1074	griseocollis	Brown-belted bumble bee	Indiana	United States	2014-04-22	Female	6308	Verified	2014-04-24	30	griseocollis !	Website
	1383	bee	1075	Unknown	Not a bumble bee	Oregon	United States	2014-04-22	Not Determined	6016	Invalid	2017-11-16	25	melanopygus	Website
	1384	bee	1076	Unknown	Not a bumble bee	Louisiana	United States	2014-04-22	Male	6981	Invalid	2014-04-23	30	sp.	Website
	1385	bee	1077	sp.	Bumble bee	Washington	United States	2014-04-07	Female	8173	Verified	2014-04-24	27	sp. !	Website
	1386	bee	1078	Unknown	Not a bumble bee	Oregon	United States	2014-04-22	Not Determined	6016	Invalid	2017-11-23	25	sp.	Website
	1387	bee	1079	Unknown	Not a bumble bee	Michigan	United States	2014-04-19	Female	1165	Invalid	2014-04-23	30	impatiens	Website
	1388	bee	1080	Unknown	Not a bumble bee	Virginia	United States	2014-04-22	Male	2441	Invalid	2014-04-23	30	sp.	Website
	1389	bee	1081	impatiens	Common eastern bumble bee	Alabama	United States	2014-04-22	Female	7620	Verified	2014-04-24	27	impatiens !	Website
	1390	bee	1082	impatiens	Common eastern bumble bee	Alabama	United States	2014-04-22	Female	6238	Verified	2014-04-23	30	impatiens !	Website
	1391	bee	1083	bimaculatus	Two-spotted bumble bee	Alabama	United States	2014-04-19	Female	6238	Verified	2019-02-22	23	bimaculatus !	Website
	1392	bee	1084	Unknown	Not a bumble bee	Virginia	United States	2014-04-22	Male	4971	Invalid	2014-04-23	30	sp.	Website
	1393	bee	1085	pensylvanicus	American bumble bee	Texas	United States	2014-04-22	Female	7891	Verified	2014-04-24	27	pensylvanicus !	Website
	1394	bee	1086	sp.	Bumble bee	Ontario	Canada	2013-08-26	Male	784	Verified	2014-04-24	27	sp. !	Website
	1395	bee	1087	Unknown	Not a bumble bee	Ontario	Canada	2013-08-26	Female	784	Invalid	2014-04-23	30	sp.	Website
	1396	bee	1088	Unknown	Not a bumble bee	North Carolina	United States	2014-04-23	Male	6994	Invalid	2014-04-23	30	sp.	Website
	1397	bee	1090	impatiens	Common eastern bumble bee	Massachusetts	United States	2014-04-22	Female	3606	Verified	2014-04-23	30	impatiens !	Website
	1398	bee	1091	melanopygus	Black-tailed bumble bee	California	United States	2014-04-22	Female	8027	Verified	2014-04-24	27	melanopygus !	Website
	1399	bee	1093	fervidus	Yellow bumble bee	Pennsylvania	United States	2013-08-10	Female	4882	Verified	2014-04-24	27	fervidus !	Website
	1400	bee	1096	melanopygus	Black-tailed bumble bee	Oregon	United States	2014-04-15	Female	2897	Verified	2014-04-24	27	melanopygus !	Website
	1401	bee	1097	impatiens	Common eastern bumble bee	New York	United States	2014-04-21	Female	3612	Verified	2014-04-23	30	impatiens !	Website
	1402	bee	1098	vosnesenskii	Yellow-faced bumble bee	Oregon	United States	2014-04-18	Female	7591	Verified	2014-04-24	27	vosnesenskii !	Website
	1403	bee	1099	Unknown	Not a bumble bee	South Carolina	United States	2014-04-23	Male	6578	Invalid	2014-04-23	30	sp.	Website
	1404	bee	1100	pensylvanicus	American bumble bee	Texas	United States	2014-04-23	Female	7891	Verified	2014-04-24	27	pensylvanicus !	Website
	1405	bee	1101	sp.	Bumble bee	Oregon	United States	2014-04-21	Not Determined	3277	Verified	2015-07-22	27	sp. !	Website
	1406	bee	1102	fervidus	Yellow bumble bee	California	United States	2014-04-24	Female	5791	Verified	2017-12-01	27	pensylvanicus	Website
	1407	bee	1103	auricomus	Black and gold bumble bee	Texas	United States	2014-04-23	Female	3823	Verified	2016-05-12	18	auricomus !	Website
	1408	bee	1104	griseocollis	Brown-belted bumble bee	Texas	United States	2014-04-23	Female	3823	Verified	2014-04-25	30	griseocollis !	Website
	1409	bee	1105	pensylvanicus	American bumble bee	Texas	United States	2014-04-23	Female	3823	Verified	2017-12-01	27	pensylvanicus	Website
	1410	bee	1106	griseocollis	Brown-belted bumble bee	Texas	United States	2014-04-18	Female	3823	Verified	2014-04-25	30	griseocollis !	Website
	1411	bee	1107	Unknown	Not a bumble bee	Tennessee	United States	2014-04-24	Female	5220	Invalid	2014-04-25	30	sp.	Website
	1412	bee	1108	perplexus	Confusing bumble bee	Massachusetts	United States	2014-04-24	Female	1066	Verified	2014-04-25	30	perplexus !	Website
	1413	bee	1109	Unknown	Not a bumble bee	Georgia	United States	2014-04-24	Male	6987	Invalid	2014-04-25	30	sp.	Website
	1414	bee	1110	melanopygus	Black-tailed bumble bee	California	United States	2014-04-22	Female	3411	Verified	2017-12-01	27	melanopygus	Website
	1415	bee	1111	Unknown	Not a bumble bee	Nova Scotia	Canada	2011-10-05	Not Determined	7915	Invalid	2017-09-27	34	sp.	Website
	1416	bee	1112	Unknown	Not a bumble bee	Indiana	United States	2014-04-11	Female	7555	Invalid	2014-04-25	30	sp.	Website
	1417	bee	1113	Unknown	Not a bumble bee	Texas	United States	2014-04-19	Male	5878	Invalid	2014-09-15	8	sp.	Website
	1418	bee	1114	vosnesenskii or caliginosus	Yellow-faced group	Washington	United States	2014-04-25	Female	1930	Verified	2015-02-26	27	vosnesenskii or caliginosus !	Website
	1419	bee	1115	sp.	Bumble bee	Washington	United States	2014-04-25	Female	1930	Verified	2014-11-07	8	sp. !	Website
	1420	bee	1116	vosnesenskii	Yellow-faced bumble bee	Washington	United States	2014-04-25	Female	5861	Verified	2015-02-26	27	vosnesenskii !	Website
	1421	bee	1117	Unknown	Not a bumble bee	Virginia	United States	2014-04-18	Female	7893	Invalid	2017-12-01	27	griseocollis	Website
	1422	bee	1118	sp.	Bumble bee	Utah	United States	2014-04-25	Female	2647	Verified	2017-12-01	27	fervidus	Website
	1423	bee	1119	vosnesenskii	Yellow-faced bumble bee	British Columbia	Canada	2014-04-25	Female	6962	Verified	2017-12-01	27	insularis	Website
	1424	bee	1120	Unknown	Not a bumble bee	Florida	United States	2014-04-23	Female	7344	Invalid	2017-12-01	27	griseocollis	Website
	1425	bee	1121	sp.	Bumble bee	New Jersey	United States	2014-04-26	Female	4067	Verified	2017-12-01	27	sp.	Website
	1426	bee	1122	Unknown	Not a bumble bee	Tennessee	United States	2014-04-26	Female	5220	Invalid	2017-12-01	27	griseocollis	Website
	1427	bee	1123	Unknown	Not a bumble bee	Oregon	United States	2014-04-25	Male	1076	Invalid	2014-09-08	8	sp.	Website
	1428	bee	1124	Unknown	Not a bumble bee	Maryland	United States	2014-04-26	Male	384	Invalid	2014-09-22	8	sp.	Website
	1429	bee	1125	Unknown	Not a bumble bee	Oregon	United States	2014-04-26	Male	3346	Invalid	2014-09-08	8	sp.	Website
	1430	bee	1126	Unknown	Not a bumble bee	Virginia	United States	2014-04-19	Male	7893	Invalid	2014-09-22	8	sp.	Website
	1431	bee	1127	bifarius	Two-form bumble bee	Idaho	United States	2014-04-14	Male	1151	Verified	2017-08-09	27	rufocinctus	Website
	1432	bee	1128	mixtus	Fuzzy-horned bumble bee	Washington	United States	2013-09-02	Female	6145	Verified	2017-09-25	25	mixtus	Website
	1433	bee	1129	Unknown	Not a bumble bee	Oregon	United States	2014-04-25	Not Determined	4138	Invalid	2017-11-16	27	griseocollis	Website
	1434	bee	1131	Unknown	Not a bumble bee	Maryland	United States	2014-04-26	Male	2968	Invalid	2014-09-22	8	sp.	Website
	1435	bee	1132	impatiens	Common eastern bumble bee	Maryland	United States	2014-04-26	Female	2968	Verified	2017-06-21	25	bimaculatus	Website
	1436	bee	1133	Unknown	Not a bumble bee	Illinois	United States	2014-04-26	Male	6252	Invalid	2014-05-27	30	affinis	Website
	1437	bee	1136	Unknown	Not a bumble bee	Texas	United States	2014-04-19	Male	6332	Invalid	2014-09-08	8	sp.	Website
	1438	bee	1137	pensylvanicus	American bumble bee	Texas	United States	2014-04-25	Not Determined	1161	Verified	2015-05-18	27	pensylvanicus !	Website
	1439	bee	1138	impatiens	Common eastern bumble bee	Ohio	United States	2014-04-27	Female	5141	Verified	2017-03-31	25	impatiens	Website
	1440	bee	1139	flavifrons	Yellow head bumble bee	Washington	United States	2014-04-27	Female	5330	Verified	2016-05-10	27	flavifrons !	Website
	1441	bee	1141	impatiens	Common eastern bumble bee	Ohio	United States	2014-04-27	Female	4567	Verified	2017-12-01	27	sp.	Website
	1442	bee	1142	Unknown	Not a bumble bee	Virginia	United States	2014-04-27	Female	6835	Invalid	2017-07-06	27	terricola	Website
	1443	bee	1143	sp.	Bumble bee	New York	United States	2014-04-27	Female	3612	Verified	2017-12-01	27	impatiens	Website
	1444	bee	1144	impatiens	Common eastern bumble bee	Michigan	United States	2014-04-26	Female	8288	Verified	2016-01-09	14	impatiens !	Website
	1445	bee	1145	bimaculatus	Two-spotted bumble bee	Wisconsin	United States	2014-04-21	Female	7814	Verified	2017-12-01	27	bimaculatus	Website
	1446	bee	1146	vosnesenskii	Yellow-faced bumble bee	Washington	United States	2014-04-26	Female	5861	Verified	2015-02-26	27	vosnesenskii !	Website
	1447	bee	1147	vosnesenskii	Yellow-faced bumble bee	Washington	United States	2014-04-26	Female	5861	Verified	2015-02-26	27	vosnesenskii !	Website
	1448	bee	1148	sp.	Bumble bee	Connecticut	United States	2014-04-27	Female	1615	Verified	2017-12-01	27	griseocollis	Website
	1449	bee	1149	Unknown	Not a bumble bee	Kentucky	United States	2014-04-26	Female	3376	Invalid	2017-12-01	27	griseocollis	Website
	1450	bee	1150	Unknown	Not a bumble bee	Virginia	United States	2014-04-27	Male	7867	Invalid	2014-09-15	8	sp.	Website
	1451	bee	1151	vosnesenskii	Yellow-faced bumble bee	Oregon	United States	2014-04-02	Not Determined	5124	Verified	2017-11-15	25	fervidus	Website
	1452	bee	1152	melanopygus	Black-tailed bumble bee	Oregon	United States	2014-04-27	Female	2897	Verified	2017-11-16	25	melanopygus	Website
	1453	bee	1153	Unknown	Not a bumble bee	Oregon	United States	2014-04-27	Male	2897	Invalid	2014-09-08	8	sp.	Website
	1454	bee	1154	sp.	Bumble bee	Oregon	United States	2014-04-27	Female	2897	Verified	2015-07-22	27	sp. !	Website
	1455	bee	1156	Unknown	Not a bumble bee	Oregon	United States	2014-04-28	Female	2897	Invalid	2015-02-02	8	sp.	Website
	1456	bee	1157	Unknown	Not a bumble bee	Oregon	United States	2014-04-28	Male	2897	Invalid	2014-09-22	8	sp.	Website
	1457	bee	1158	impatiens	Common eastern bumble bee	Alabama	United States	2014-04-22	Female	2283	Verified	2017-03-31	25	impatiens	Website
	1458	bee	1159	impatiens	Common eastern bumble bee	Alabama	United States	2014-04-28	Female	2283	Verified	2017-03-31	25	impatiens	Website
	1459	bee	1160	impatiens	Common eastern bumble bee	Alabama	United States	2014-04-28	Female	2283	Verified	2017-03-31	25	impatiens	Website
	1460	bee	1161	nevadensis	Nevada bumble bee	Oregon	United States	2014-04-20	Female	3992	Verified	2017-11-15	25	fervidus	Website
	1461	bee	1162	bimaculatus	Two-spotted bumble bee	Illinois	United States	2014-04-25	Female	685	Verified	2017-06-21	25	bimaculatus	Website
	1462	bee	1164	vosnesenskii or caliginosus	Yellow-faced group	Washington	United States	2014-04-28	Female	5861	Verified	2015-02-26	27	vosnesenskii or caliginosus !	Website
	1463	bee	1165	Unknown	Not a bumble bee	Oregon	United States	2014-04-28	Female	4126	Invalid	2017-12-01	27	franklini	Website
	1464	bee	1166	Unknown	Not a bumble bee	Washington	United States	2014-04-28	Not Determined	5861	Invalid	2017-09-13	25	sp.	Website
	1465	bee	1167	flavifrons	Yellow head bumble bee	Washington	United States	2014-04-28	Female	5861	Verified	2017-09-25	25	sp.	Website
	1466	bee	1168	bifarius	Two-form bumble bee	British Columbia	Canada	2014-04-26	Female	140	Verified	2015-03-26	27	bifarius !	Website
	1467	bee	1170	Unknown	Not a bumble bee	Wisconsin	United States	2014-04-22	Male	6080	Invalid	2014-09-08	8	sp.	Website
	1468	bee	1171	flavifrons	Yellow head bumble bee	Washington	United States	2014-04-28	Female	5861	Verified	2017-09-25	25	sp.	Website
	1469	bee	1172	vagans	Half-black bumble bee	Alberta	Canada	2013-07-31	Female	1825	Verified	2017-12-01	27	vagans	Website
	1470	bee	1173	sp.	Bumble bee	Alberta	Canada	2013-07-31	Female	1825	Verified	2017-12-01	27	rufocinctus	Website
	1471	bee	1174	nevadensis	Nevada bumble bee	Alberta	Canada	2007-07-26	Female	1825	Verified	2015-08-13	4	nevadensis !	Website
	1472	bee	1175	vosnesenskii or caliginosus	Yellow-faced group	Oregon	United States	2014-04-28	Female	6213	Verified	2017-11-17	25	caliginosus	Website
	1473	bee	1176	sitkensis	Sitka bumble bee	California	United States	2014-04-28	Female	535	Verified	2017-12-01	27	sp.	Website
	1474	bee	1177	sitkensis	Sitka bumble bee	California	United States	2014-04-28	Female	535	Verified	2017-12-01	27	sitkensis	Website
	1475	bee	1178	caliginosus	Obscure bumble bee	California	United States	2014-04-28	Female	535	Verified	2017-12-01	27	caliginosus	Website
	1476	bee	1179	caliginosus	Obscure bumble bee	California	United States	2014-04-28	Female	535	Verified	2017-12-01	27	caliginosus	Website
	1477	bee	1180	caliginosus	Obscure bumble bee	California	United States	2014-04-28	Female	535	Verified	2017-12-01	27	caliginosus	Website
	1478	bee	1181	impatiens	Common eastern bumble bee	New Jersey	United States	2014-04-28	Female	4673	Verified	2017-12-01	27	sp.	Website
	1479	bee	1183	vosnesenskii	Yellow-faced bumble bee	Oregon	United States	2014-04-26	Female	3992	Verified	2015-02-09	27	vosnesenskii !	Website
	1480	bee	1184	vosnesenskii	Yellow-faced bumble bee	Oregon	United States	2014-04-29	Female	731	Verified	2017-12-01	27	insularis	Website
	1481	bee	1185	vosnesenskii or caliginosus	Yellow-faced group	Oregon	United States	2014-04-29	Female	4398	Verified	2017-11-17	25	caliginosus	Website
	1482	bee	1186	impatiens	Common eastern bumble bee	Illinois	United States	2014-04-29	Female	1434	Verified	2017-12-01	27	sp.	Website
	1483	bee	1187	mixtus	Fuzzy-horned bumble bee	Washington	United States	2014-04-29	Female	5861	Verified	2017-09-25	25	sp.	Website
	1484	bee	1188	vosnesenskii or caliginosus	Yellow-faced group	Oregon	United States	2014-04-29	Female	3007	Verified	2017-11-17	25	caliginosus	Website
	1485	bee	1189	flavifrons	Yellow head bumble bee	Washington	United States	2014-04-29	Female	5861	Verified	2017-09-25	25	sp.	Website
	1486	bee	1190	vosnesenskii	Yellow-faced bumble bee	Washington	United States	2014-04-29	Female	5861	Verified	2015-02-26	27	vosnesenskii !	Website
	1487	bee	1191	melanopygus	Black-tailed bumble bee	Oregon	United States	2014-04-29	Female	8511	Verified	2014-10-06	8	melanopygus !	Website
	1488	bee	1192	melanopygus	Black-tailed bumble bee	British Columbia	Canada	2014-04-29	Female	2735	Verified	2014-11-07	8	melanopygus !	Website
	1489	bee	1193	sp.	Bumble bee	British Columbia	Canada	2014-04-29	Female	2735	Verified	2017-12-01	27	sp.	Website
	1490	bee	1194	Unknown	Not a bumble bee	Texas	United States	2014-04-29	Male	7943	Invalid	2014-09-08	8	sp.	Website
	1491	bee	1195	flavifrons	Yellow head bumble bee	Washington	United States	2014-04-29	Female	5861	Verified	2017-09-25	25	sp.	Website
	1492	bee	1196	Unknown	Not a bumble bee	Washington	United States	2014-04-29	Male	1930	Invalid	2014-09-08	8	sp.	Website
	1493	bee	1197	Unknown	Not a bumble bee	Alabama	United States	2014-04-13	Male	4486	Invalid	2014-05-27	30	affinis	Website
	1494	bee	1198	melanopygus	Black-tailed bumble bee	British Columbia	Canada	2014-04-30	Female	3402	Verified	2014-11-07	8	melanopygus !	Website
	1495	bee	1199	melanopygus	Black-tailed bumble bee	Oregon	United States	2014-04-29	Female	2050	Verified	2014-10-16	27	melanopygus !	Website
	1496	bee	1200	vosnesenskii or caliginosus	Yellow-faced group	Oregon	United States	2014-04-29	Female	4012	Verified	2017-11-17	25	caliginosus	Website
	1497	bee	1201	Unknown	Not a bumble bee	Oregon	United States	2014-04-30	Not Determined	6939	Invalid	2017-11-23	25	sp.	Website
	1498	bee	1202	melanopygus	Black-tailed bumble bee	Washington	United States	2014-04-29	Female	1930	Verified	2014-11-07	8	melanopygus !	Website
	1499	bee	1203	vosnesenskii	Yellow-faced bumble bee	British Columbia	Canada	2014-04-30	Female	3402	Verified	2017-12-01	27	vosnesenskii	Website
	1500	bee	1204	vosnesenskii or caliginosus	Yellow-faced group	Washington	United States	2014-04-30	Female	5861	Verified	2015-02-26	27	vosnesenskii or caliginosus !	Website
	1501	bee	1205	melanopygus	Black-tailed bumble bee	Oregon	United States	2014-04-25	Female	4138	Verified	2014-10-16	27	melanopygus !	Website
	1502	bee	1206	melanopygus	Black-tailed bumble bee	Oregon	United States	2014-04-30	Female	7859	Verified	2014-10-06	8	melanopygus !	Website
	1503	bee	1207	melanopygus	Black-tailed bumble bee	Oregon	United States	2013-10-26	Not Determined	1009	Verified	2015-08-09	27	melanopygus !	Website
	1504	bee	1208	sp.	Bumble bee	Oregon	United States	2014-04-30	Female	7932	Verified	2017-11-15	25	fervidus	Website
	1505	bee	1209	impatiens	Common eastern bumble bee	Massachusetts	United States	2014-04-22	Not Determined	1009	Verified	2015-08-09	27	impatiens !	Website
	1506	bee	1210	melanopygus	Black-tailed bumble bee	Oregon	United States	2014-05-01	Female	6709	Verified	2017-11-14	25	mixtus	Website
	1507	bee	1211	Unknown	Not a bumble bee	Oregon	United States	2014-04-30	Female	8455	Invalid	2014-05-15	27	sp.	Website
	1508	bee	1212	vosnesenskii or caliginosus	Yellow-faced group	Oregon	United States	2014-04-30	Female	234	Verified	2017-11-17	25	caliginosus	Website
	1509	bee	1213	caliginosus	Obscure bumble bee	Oregon	United States	2014-05-01	Female	3051	Verified	2017-11-17	25	caliginosus	Website
	1510	bee	1214	ternarius	Tri-colored bumble bee	Ontario	Canada	2013-08-04	Female	5621	Verified	2017-06-12	34	ternarius	Website
	1511	bee	1215	mixtus	Fuzzy-horned bumble bee	British Columbia	Canada	2014-05-01	Female	3402	Verified	2014-11-07	8	mixtus !	Website
	1512	bee	1216	bifarius	Two-form bumble bee	British Columbia	Canada	2013-06-28	Female	4357	Verified	2015-03-26	27	bifarius !	Website
	1513	bee	1217	melanopygus	Black-tailed bumble bee	British Columbia	Canada	2011-03-31	Female	4357	Verified	2017-12-01	27	flavifrons	Website
	1514	bee	1218	vosnesenskii	Yellow-faced bumble bee	British Columbia	Canada	2012-06-02	Female	4357	Verified	2017-12-01	27	vosnesenskii	Website
	1515	bee	1220	vosnesenskii or caliginosus	Yellow-faced group	Oregon	United States	2014-05-02	Female	5750	Verified	2016-05-10	27	vosnesenskii or caliginosus !	Website
	1516	bee	1221	Unknown	Not a bumble bee	California	United States	2014-05-02	Female	4836	Invalid	2017-12-01	27	sp.	Website
	1517	bee	1222	vosnesenskii	Yellow-faced bumble bee	Washington	United States	2014-05-02	Female	5861	Verified	2015-02-26	27	vosnesenskii !	Website
	1518	bee	1223	melanopygus	Black-tailed bumble bee	Washington	United States	2014-05-02	Female	5861	Verified	2017-09-25	25	sp.	Website
	1519	bee	1224	vosnesenskii or caliginosus	Yellow-faced group	Oregon	United States	2013-07-31	Female	2448	Verified	2017-11-17	25	caliginosus	Website
	1520	bee	1225	bimaculatus	Two-spotted bumble bee	Alabama	United States	2014-05-01	Female	7279	Verified	2019-02-22	23	bimaculatus !	Website
	1521	bee	1227	impatiens	Common eastern bumble bee	Alabama	United States	2014-05-01	Female	7279	Verified	2014-09-23	27	impatiens !	Website
	1522	bee	1228	Unknown	Not a bumble bee	Florida	United States	2014-03-08	Male	6435	Invalid	2014-09-22	8	sp.	Website
	1523	bee	1229	Unknown	Not a bumble bee	Indiana	United States	2014-04-30	Male	473	Invalid	2014-09-08	8	sp.	Website
	1524	bee	1230	centralis	Central bumble bee	Idaho	United States	2014-05-02	Female	5391	Verified	2014-11-07	8	centralis !	Website
	1525	bee	1231	sp.	Bumble bee	Wisconsin	United States	2014-05-03	Male	1993	Verified	2014-09-02	27	sp. !	Website
	1526	bee	1232	Unknown	Not a bumble bee	Wisconsin	United States	2014-05-03	Male	1993	Invalid	2014-09-08	8	sp.	Website
	1527	bee	1233	Unknown	Not a bumble bee	Wisconsin	United States	2014-05-03	Male	1993	Invalid	2014-09-02	27	sp.	Website
	1528	bee	1234	Unknown	Not a bumble bee	Virginia	United States	2014-05-03	Female	6835	Invalid	2017-12-01	27	impatiens	Website
	1529	bee	1235	vosnesenskii or caliginosus	Yellow-faced group	Oregon	United States	2014-05-02	Female	6671	Verified	2015-02-09	27	vosnesenskii or caliginosus !	Website
	1530	bee	1236	Unknown	Not a bumble bee	California	United States	2014-05-03	Female	4412	Invalid	2017-12-01	27	sp.	Website
	1531	bee	1237	Unknown	Not a bumble bee	Arkansas	United States	2014-05-03	Female	2633	Invalid	2017-12-01	27	fervidus	Website
	1532	bee	1238	Unknown	Not a bumble bee	Maryland	United States	2014-05-03	Female	5617	Invalid	2017-12-01	27	griseocollis	Website
	1533	bee	1239	impatiens	Common eastern bumble bee	Alabama	United States	2014-05-01	Female	7279	Verified	2014-09-23	27	impatiens !	Website
	1534	bee	1240	vagans	Half-black bumble bee	Idaho	United States	2014-05-03	Female	7376	Verified	2017-08-09	27	vagans	Website
	1535	bee	1241	impatiens	Common eastern bumble bee	Massachusetts	United States	2014-05-03	Female	1813	Verified	2017-03-31	25	impatiens	Website
	1536	bee	1242	flavifrons	Yellow head bumble bee	Oregon	United States	2014-04-24	Female	4008	Verified	2017-11-16	25	flavifrons	Website
	1537	bee	1243	melanopygus	Black-tailed bumble bee	Oregon	United States	2014-04-24	Female	4008	Verified	2014-10-06	8	melanopygus !	Website
	1538	bee	1244	mixtus	Fuzzy-horned bumble bee	Oregon	United States	2014-04-25	Female	4008	Verified	2017-11-14	25	mixtus	Website
	1539	bee	1246	vosnesenskii	Yellow-faced bumble bee	Oregon	United States	2014-04-27	Female	4008	Verified	2015-02-09	27	vosnesenskii !	Website
	1540	bee	1247	flavifrons	Yellow head bumble bee	Oregon	United States	2014-04-28	Female	4008	Verified	2017-11-16	25	flavifrons	Website
	1541	bee	1248	flavifrons	Yellow head bumble bee	Oregon	United States	2014-04-28	Female	4008	Verified	2017-11-16	25	flavifrons	Website
	1542	bee	1249	melanopygus	Black-tailed bumble bee	Oregon	United States	2014-04-29	Female	4008	Verified	2014-10-06	8	melanopygus !	Website
	1543	bee	1250	Unknown	Not a bumble bee	Missouri	United States	2014-05-03	Female	1933	Invalid	2017-12-01	27	impatiens	Website
	1544	bee	1251	bimaculatus	Two-spotted bumble bee	Alabama	United States	2014-04-11	Female	6238	Verified	2019-02-22	23	bimaculatus !	Website
	1545	bee	1252	melanopygus	Black-tailed bumble bee	Oregon	United States	2014-05-03	Female	2259	Verified	2017-11-16	25	flavifrons	Website
	1546	bee	1253	Unknown	Not a bumble bee	Ohio	United States	2014-05-02	Not Determined	4891	Invalid	2017-06-21	25	bimaculatus	Website
	1547	bee	1254	Unknown	Not a bumble bee	California	United States	2014-05-03	Male	3848	Invalid	2014-09-08	8	sp.	Website
	1548	bee	1255	sp.	Bumble bee	Pennsylvania	United States	2010-08-26	Female	6529	Verified	2017-12-01	27	pensylvanicus	Website
	1549	bee	1256	Unknown	Not a bumble bee	Alabama	United States	2014-04-14	Male	6238	Invalid	2014-09-22	8	sp.	Website
	1550	bee	1257	bimaculatus	Two-spotted bumble bee	Alabama	United States	2014-04-19	Female	6238	Verified	2019-02-22	23	bimaculatus !	Website
	1551	bee	1258	Unknown	Not a bumble bee	Alabama	United States	2014-04-19	Female	6238	Invalid	2016-06-04	16	impatiens	Website
	1552	bee	1259	impatiens	Common eastern bumble bee	Alabama	United States	2014-04-25	Female	6238	Verified	2017-12-01	27	auricomus	Website
	1553	bee	1260	Unknown	Not a bumble bee	Alabama	United States	2014-04-20	Male	6238	Invalid	2016-06-04	16	impatiens	Website
	1554	bee	1261	bimaculatus	Two-spotted bumble bee	Alabama	United States	2014-04-18	Female	6238	Verified	2019-02-22	23	bimaculatus !	Website
	1555	bee	1262	bimaculatus	Two-spotted bumble bee	Alabama	United States	2014-04-19	Female	6238	Verified	2019-02-22	23	bimaculatus !	Website
	1556	bee	1263	impatiens	Common eastern bumble bee	Alabama	United States	2014-04-11	Female	6238	Verified	2017-12-01	27	bimaculatus	Website
	1557	bee	1264	sp.	Bumble bee	Alabama	United States	2014-04-30	Female	6238	Verified	2017-12-01	27	bimaculatus	Website
	1558	bee	1265	Unknown	Not a bumble bee	Alabama	United States	2014-04-27	Female	6238	Invalid	2017-12-01	27	auricomus	Website
	1559	bee	1266	bimaculatus	Two-spotted bumble bee	Alabama	United States	2014-04-28	Female	430	Verified	2019-02-22	23	auricomus	Website
	1560	bee	1267	Unknown	Not a bumble bee	Alabama	United States	2014-04-30	Male	430	Invalid	2014-09-23	27	sp.	Website
	1561	bee	1268	Unknown	Not a bumble bee	Alabama	United States	2014-04-30	Male	430	Invalid	2014-09-23	27	sp.	Website
	1562	bee	1269	Unknown	Not a bumble bee	Indiana	United States	2014-05-04	Female	5481	Invalid	2016-02-21	14	sp.	Website
	1563	bee	1270	Unknown	Not a bumble bee	Alabama	United States	2014-04-27	Male	6238	Invalid	2014-05-04	30	auricomus	Website
	1564	bee	1271	Unknown	Not a bumble bee	Alabama	United States	2014-04-26	Male	6238	Invalid	2014-05-04	30	auricomus	Website
	1565	bee	1272	Unknown	Not a bumble bee	Alabama	United States	2014-04-25	Not Determined	6238	Invalid	2017-03-31	25	impatiens	Website
	1566	bee	1273	Unknown	Not a bumble bee	Alabama	United States	2014-04-23	Female	6238	Invalid	2014-05-04	30	auricomus	Website
	1567	bee	1274	Unknown	Not a bumble bee	Alabama	United States	2014-04-23	Not Determined	6238	Invalid	2017-03-31	25	impatiens	Website
	1568	bee	1275	impatiens	Common eastern bumble bee	Alabama	United States	2014-04-23	Female	6238	Verified	2017-12-01	27	bimaculatus	Website
	1569	bee	1276	bimaculatus	Two-spotted bumble bee	Alabama	United States	2014-04-19	Female	6238	Verified	2019-02-22	23	bimaculatus !	Website
	1570	bee	1277	Unknown	Not a bumble bee	Alabama	United States	2014-04-22	Male	6238	Invalid	2014-09-08	8	sp.	Website
	1571	bee	1278	Unknown	Not a bumble bee	Alabama	United States	2014-04-22	Male	6238	Invalid	2014-09-08	8	sp.	Website
	1572	bee	1279	Unknown	Not a bumble bee	Alabama	United States	2014-04-22	Female	6238	Invalid	2017-12-01	27	impatiens	Website
	1573	bee	1280	Unknown	Not a bumble bee	Alabama	United States	2014-04-22	Male	6238	Invalid	2014-09-08	8	sp.	Website
	1574	bee	1281	Unknown	Not a bumble bee	Alabama	United States	2014-04-17	Not Determined	6238	Invalid	2017-03-31	25	impatiens	Website
	1575	bee	1282	Unknown	Not a bumble bee	Mississippi	United States	2014-04-27	Female	1394	Invalid	2017-12-01	27	fraternus	Website
	1576	bee	1283	Unknown	Not a bumble bee	Alabama	United States	2014-04-26	Male	1394	Invalid	2014-05-04	30	impatiens	Website
	1577	bee	1284	Unknown	Not a bumble bee	Alabama	United States	2014-04-28	Female	1394	Invalid	2017-12-01	27	impatiens	Website
	1578	bee	1285	Unknown	Not a bumble bee	Alabama	United States	2014-04-27	Male	1394	Invalid	2014-05-04	30	bimaculatus	Website
	1579	bee	1286	Unknown	Not a bumble bee	Alabama	United States	2014-04-19	Male	1394	Invalid	2014-05-04	30	bimaculatus	Website
	1580	bee	1287	impatiens	Common eastern bumble bee	Alabama	United States	2014-04-30	Female	1394	Verified	2014-05-04	30	impatiens !	Website
	1581	bee	1289	sp.	Bumble bee	Alabama	United States	2014-04-19	Female	1394	Verified	2017-12-01	27	bimaculatus	Website
	1582	bee	1290	impatiens	Common eastern bumble bee	Alabama	United States	2014-05-01	Female	1394	Verified	2014-05-04	30	impatiens !	Website
	1583	bee	1291	impatiens	Common eastern bumble bee	New York	United States	2014-05-04	Female	3669	Verified	2014-05-04	30	impatiens !	Website
	1584	bee	1292	vosnesenskii	Yellow-faced bumble bee	British Columbia	Canada	2014-05-04	Female	6962	Verified	2017-12-01	27	insularis	Website
	1585	bee	1293	impatiens	Common eastern bumble bee	Alabama	United States	2014-05-02	Female	7620	Verified	2014-11-03	27	impatiens !	Website
	1586	bee	1294	impatiens	Common eastern bumble bee	Alabama	United States	2014-05-02	Female	7620	Verified	2014-11-03	27	impatiens !	Website
	1587	bee	1295	impatiens	Common eastern bumble bee	Alabama	United States	2014-05-02	Female	7620	Verified	2014-11-03	27	impatiens !	Website
	1588	bee	1296	impatiens	Common eastern bumble bee	Alabama	United States	2014-05-03	Female	7620	Verified	2014-11-03	27	impatiens !	Website
	1589	bee	1297	impatiens	Common eastern bumble bee	Alabama	United States	2014-05-03	Female	7620	Verified	2014-11-03	27	impatiens !	Website
	1590	bee	1298	impatiens	Common eastern bumble bee	Alabama	United States	2014-05-03	Female	7620	Verified	2014-11-03	27	impatiens !	Website
	1591	bee	1299	bimaculatus	Two-spotted bumble bee	Alabama	United States	2014-05-03	Female	7620	Verified	2019-02-22	23	impatiens	Website
	1592	bee	1300	impatiens	Common eastern bumble bee	Alabama	United States	2014-05-03	Female	7620	Verified	2014-11-03	27	impatiens !	Website
	1593	bee	1301	impatiens	Common eastern bumble bee	Alabama	United States	2014-05-03	Female	7620	Verified	2017-12-04	27	impatiens	Website
	1594	bee	1302	impatiens	Common eastern bumble bee	Alabama	United States	2014-05-03	Female	7620	Verified	2014-11-03	27	impatiens !	Website
	1595	bee	1303	Unknown	Not a bumble bee	Illinois	United States	2014-04-21	Female	5880	Invalid	2017-12-04	27	auricomus	Website
	1596	bee	1304	Unknown	Not a bumble bee	Kentucky	United States	2014-05-04	Female	6308	Invalid	2017-12-04	27	griseocollis	Website
	1597	bee	1305	impatiens	Common eastern bumble bee	Alabama	United States	2014-05-02	Female	7620	Verified	2014-11-03	27	impatiens !	Website
	1598	bee	1306	vosnesenskii or caliginosus	Yellow-faced group	California	United States	2014-05-04	Female	4016	Verified	2015-02-26	27	vosnesenskii or caliginosus !	Website
	1599	bee	1307	Unknown	Not a bumble bee	Alabama	United States	2014-04-27	Male	7620	Invalid	2014-09-08	8	sp.	Website
	1600	bee	1308	impatiens	Common eastern bumble bee	Alabama	United States	2014-03-11	Female	977	Verified	2017-12-04	27	bimaculatus	Website
	1601	bee	1309	Unknown	Not a bumble bee	Alabama	United States	2014-04-18	Female	977	Invalid	2017-12-04	27	impatiens	Website
	1602	bee	1310	Unknown	Not a bumble bee	Alabama	United States	2014-04-24	Not Determined	977	Invalid	2017-12-04	27	impatiens	Website
	1603	bee	1311	Unknown	Not a bumble bee	Alabama	United States	2014-04-24	Female	977	Invalid	2017-12-04	27	bimaculatus	Website
	1604	bee	1312	Unknown	Not a bumble bee	Arkansas	United States	2014-04-27	Not Determined	4527	Invalid	2017-06-23	25	bimaculatus	Website
	1605	bee	1313	Unknown	Not a bumble bee	Montana	United States	2014-05-04	Female	8266	Invalid	2017-12-04	27	huntii	Website
	1606	bee	1314	griseocollis	Brown-belted bumble bee	Oklahoma	United States	2014-05-03	Female	5863	Verified	2017-12-04	27	griseocollis	Website
	1607	bee	1315	Unknown	Not a bumble bee	Virginia	United States	2014-05-04	Female	6835	Invalid	2014-05-05	30	sandersoni	Website
	1608	bee	1316	vosnesenskii	Yellow-faced bumble bee	Oregon	United States	2014-05-02	Female	2354	Verified	2017-11-21	25	vosnesenskii	Website
	1609	bee	1317	mixtus	Fuzzy-horned bumble bee	Oregon	United States	2014-05-01	Not Determined	4008	Verified	2015-07-22	27	mixtus !	Website
	1610	bee	1318	sp.	Bumble bee	California	United States	2014-05-03	Female	6927	Verified	2017-12-04	27	sp.	Website
	1611	bee	1319	bifarius	Two-form bumble bee	Montana	United States	2014-04-29	Female	6699	Verified	2017-12-04	27	sp.	Website
	1612	bee	1320	sp.	Bumble bee	Washington	United States	2014-04-08	Female	6763	Verified	2014-05-07	27	sp. !	Website
	1613	bee	1321	Unknown	Not a bumble bee	Oregon	United States	2014-04-25	Male	7350	Invalid	2014-05-05	30	sp.	Website
	1614	bee	1322	impatiens	Common eastern bumble bee	Ontario	Canada	2014-05-05	Queen	1323	Verified	2017-10-06	34	impatiens	Website
	1615	bee	1323	impatiens	Common eastern bumble bee	Nebraska	United States	2014-05-05	Female	8242	Verified	2014-05-07	27	impatiens !	Website
	1616	bee	1324	impatiens	Common eastern bumble bee	Illinois	United States	2014-05-03	Female	399	Verified	2014-05-07	27	impatiens !	Website
	1617	bee	1325	Unknown	Not a bumble bee	Alabama	United States	2013-05-01	Male	2575	Invalid	2014-05-07	27	sp.	Website
	1618	bee	1326	Unknown	Not a bumble bee	Alabama	United States	2013-05-02	Male	2575	Invalid	2014-05-07	27	sp.	Website
	1619	bee	1327	bimaculatus	Two-spotted bumble bee	Alabama	United States	2014-04-18	Female	2575	Verified	2019-02-22	23	bimaculatus !	Website
	1620	bee	1328	vosnesenskii	Yellow-faced bumble bee	British Columbia	Canada	2011-07-05	Female	4357	Verified	2014-05-07	27	vosnesenskii !	Website
	1621	bee	1329	Unknown	Not a bumble bee	Alabama	United States	2014-04-18	Female	2575	Invalid	2014-05-27	30	affinis	Website
	1622	bee	1330	Unknown	Not a bumble bee	Alabama	United States	2014-04-18	Male	2575	Invalid	2014-05-07	27	sp.	Website
	1623	bee	1331	Unknown	Not a bumble bee	Alabama	United States	2014-04-19	Female	2575	Invalid	2017-12-04	27	impatiens	Website
	1624	bee	1332	Unknown	Not a bumble bee	Alabama	United States	2014-04-19	Male	2575	Invalid	2014-05-07	27	sp.	Website
	1625	bee	1334	sp.	Bumble bee	Alabama	United States	2014-04-19	Male	2575	Verified	2014-05-07	27	sp. !	Website
	1626	bee	1335	sp.	Bumble bee	Alabama	United States	2014-04-20	Female	2575	Verified	2014-05-07	27	sp. !	Website
	1627	bee	1336	Unknown	Not a bumble bee	Alabama	United States	2014-04-20	Male	2575	Invalid	2014-05-07	27	sp.	Website
	1628	bee	1337	flavifrons	Yellow head bumble bee	British Columbia	Canada	2011-07-05	Female	4357	Verified	2014-05-07	27	flavifrons !	Website
	1629	bee	1338	Unknown	Not a bumble bee	Alabama	United States	2014-05-04	Male	2575	Invalid	2014-05-07	27	sp.	Website
	1630	bee	1339	vosnesenskii	Yellow-faced bumble bee	British Columbia	Canada	2011-07-22	Female	4357	Verified	2014-05-07	27	vosnesenskii !	Website
	1631	bee	1340	impatiens	Common eastern bumble bee	Massachusetts	United States	2014-05-05	Female	6288	Verified	2014-05-07	27	impatiens !	Website
	1632	bee	1342	sp.	Bumble bee	Maryland	United States	2014-05-04	Female	3028	Verified	2014-05-07	27	sp. !	Website
	1633	bee	1343	sp.	Bumble bee	New York	United States	2014-04-19	Female	494	Verified	2014-05-07	27	sp. !	Website
	1634	bee	1344	bimaculatus	Two-spotted bumble bee	New York	United States	2014-05-05	Female	494	Verified	2014-05-07	27	griseocollis	Website
	1635	bee	1345	ternarius	Tri-colored bumble bee	New York	United States	2014-05-05	Female	494	Verified	2014-05-07	27	ternarius !	Website
	1636	bee	1346	pensylvanicus	American bumble bee	Texas	United States	2014-05-05	Female	7891	Verified	2014-05-07	27	pensylvanicus !	Website
	1637	bee	1347	bimaculatus	Two-spotted bumble bee	New York	United States	2014-05-05	Female	3669	Verified	2014-05-07	27	bimaculatus !	Website
	1638	bee	1348	pensylvanicus	American bumble bee	Texas	United States	2014-05-05	Female	7891	Verified	2014-05-07	27	pensylvanicus !	Website
	1639	bee	1349	pensylvanicus	American bumble bee	Texas	United States	2014-05-05	Female	7891	Verified	2014-05-07	27	pensylvanicus !	Website
	1640	bee	1353	melanopygus	Black-tailed bumble bee	British Columbia	Canada	2014-05-05	Female	3402	Verified	2014-05-07	27	melanopygus !	Website
	1641	bee	1354	sp.	Bumble bee	Alabama	United States	2014-05-03	Male	6191	Verified	2014-05-07	27	sp. !	Website
	1642	bee	1355	Unknown	Not a bumble bee	Mississippi	United States	2014-04-26	Female	6191	Invalid	2017-12-04	27	fervidus	Website
changed status from 'verified' to 'invalid', July 20/19	1643	bee	1356	Unknown	Not a bumble bee	Mississippi	United States	2014-04-26	Female	6191	Invalid	2014-05-07	27	griseocollis	Website
	1644	bee	1357	sp.	Bumble bee	Mississippi	United States	2014-04-26	Male	6191	Verified	2014-05-07	27	sp. !	Website
	1645	bee	1358	sp.	Bumble bee	Mississippi	United States	2014-04-26	Male	6191	Verified	2014-05-07	27	sp. !	Website
	1646	bee	1359	bimaculatus	Two-spotted bumble bee	Mississippi	United States	2014-04-26	Female	6191	Verified	2019-02-22	23	bimaculatus !	Website
	1647	bee	1360	sp.	Bumble bee	Mississippi	United States	2014-04-26	Male	6191	Verified	2014-05-07	27	sp. !	Website
	1648	bee	1361	Unknown	Not a bumble bee	Mississippi	United States	2014-04-26	Male	6191	Invalid	2014-05-07	27	sp.	Website
	1649	bee	1362	sp.	Bumble bee	Alabama	United States	2014-04-27	Male	6191	Verified	2014-05-07	27	sp. !	Website
	1650	bee	1363	bimaculatus	Two-spotted bumble bee	Alabama	United States	2014-04-19	Female	8020	Verified	2019-02-22	23	bimaculatus !	Website
	1651	bee	1364	Unknown	Not a bumble bee	Alabama	United States	2014-04-19	Male	8020	Invalid	2014-05-07	27	sp.	Website
	1652	bee	1365	Unknown	Not a bumble bee	Alabama	United States	2014-04-19	Male	8020	Invalid	2014-05-07	27	sp.	Website
	1653	bee	1366	Unknown	Not a bumble bee	Alabama	United States	2014-04-26	Male	8020	Invalid	2014-05-07	27	sp.	Website
	1654	bee	1367	impatiens	Common eastern bumble bee	Alabama	United States	2014-04-26	Male	8020	Verified	2014-06-29	16	impatiens !	Website
	1655	bee	1368	Unknown	Not a bumble bee	Alabama	United States	2014-05-01	Not Determined	8020	Invalid	2017-03-31	25	impatiens	Website
	1656	bee	1369	Unknown	Not a bumble bee	Alabama	United States	2014-05-01	Not Determined	8020	Invalid	2017-03-31	25	impatiens	Website
	1657	bee	1370	sp.	Bumble bee	Alabama	United States	2014-05-01	Male	8020	Verified	2014-05-07	27	sp. !	Website
	1658	bee	1371	vosnesenskii	Yellow-faced bumble bee	Oregon	United States	2014-04-27	Female	1788	Verified	2014-05-07	27	insularis	Website
	1659	bee	1372	impatiens	Common eastern bumble bee	New Hampshire	United States	2014-05-06	Female	3704	Verified	2014-05-07	27	impatiens !	Website
	1660	bee	1373	mixtus	Fuzzy-horned bumble bee	Washington	United States	2014-05-05	Female	5861	Verified	2014-05-07	27	sp.	Website
	1661	bee	1374	sp.	Bumble bee	Iowa	United States	2014-05-06	Male	6901	Verified	2014-05-07	27	pensylvanicus	Website
	1662	bee	1376	Unknown	Not a bumble bee	Washington	United States	2014-05-06	Not Determined	4038	Invalid	2017-09-14	25	huntii	Website
	1663	bee	1377	mixtus	Fuzzy-horned bumble bee	Idaho	United States	2014-05-06	Female	7376	Verified	2014-05-07	27	mixtus !	Website
	1664	bee	1378	melanopygus	Black-tailed bumble bee	Oregon	United States	2014-05-05	Female	6877	Verified	2014-05-07	27	melanopygus !	Website
	1665	bee	1379	melanopygus	Black-tailed bumble bee	Oregon	United States	2014-05-05	Female	6877	Verified	2014-05-07	27	melanopygus !	Website
	1666	bee	1380	huntii	Hunt's bumble bee	Washington	United States	2014-05-06	Female	4038	Verified	2014-05-07	27	huntii !	Website
	1667	bee	1381	vosnesenskii or caliginosus	Yellow-faced group	Oregon	United States	2014-05-07	Female	3234	Verified	2016-05-10	27	vosnesenskii or caliginosus !	Website
	1668	bee	1382	bimaculatus	Two-spotted bumble bee	New Jersey	United States	2014-05-07	Female	3166	Verified	2014-05-07	27	bimaculatus !	Website
	1669	bee	1383	vosnesenskii	Yellow-faced bumble bee	Oregon	United States	2014-05-02	Female	6877	Verified	2014-05-07	27	vosnesenskii !	Website
	1670	bee	1384	flavifrons	Yellow head bumble bee	Oregon	United States	2014-05-02	Female	6877	Verified	2014-05-07	27	flavifrons !	Website
	1671	bee	1385	Unknown	Not a bumble bee	South Carolina	United States	2014-05-07	Male	4793	Invalid	2014-05-07	27	sp.	Website
	1672	bee	1386	impatiens	Common eastern bumble bee	New York	United States	2014-05-07	Female	2220	Verified	2014-05-07	27	impatiens !	Website
	1673	bee	1387	bimaculatus	Two-spotted bumble bee	Wisconsin	United States	2014-05-07	Female	1993	Verified	2014-05-27	24	bimaculatus !	Website
	1674	bee	1388	Unknown	Not a bumble bee	Oregon	United States	2014-05-07	Male	7721	Invalid	2014-10-06	8	sp.	Website
	1675	bee	1389	impatiens	Common eastern bumble bee	Massachusetts	United States	2014-05-07	Female	678	Verified	2017-12-04	27	rufocinctus	Website
	1676	bee	1390	Unknown	Not a bumble bee	Oregon	United States	2014-05-01	Not Determined	4853	Invalid	2017-08-08	27	griseocollis	Website
	1677	bee	1391	mixtus	Fuzzy-horned bumble bee	British Columbia	Canada	2014-05-07	Female	3240	Verified	2017-12-04	27	mixtus	Website
	1678	bee	1392	melanopygus	Black-tailed bumble bee	British Columbia	Canada	2014-05-07	Female	3240	Verified	2014-11-07	8	melanopygus !	Website
	1679	bee	1393	mixtus	Fuzzy-horned bumble bee	British Columbia	Canada	2014-05-07	Female	3240	Verified	2017-12-04	27	mixtus	Website
	1680	bee	1394	melanopygus	Black-tailed bumble bee	Oregon	United States	2014-05-07	Female	7804	Verified	2015-02-27	27	melanopygus !	Website
	1681	bee	1395	melanopygus	Black-tailed bumble bee	Oregon	United States	2014-05-07	Female	6283	Verified	2014-10-06	8	melanopygus !	Website
	1682	bee	1396	melanopygus	Black-tailed bumble bee	British Columbia	Canada	2014-05-07	Female	3240	Verified	2014-11-07	8	melanopygus !	Website
	1683	bee	1397	melanopygus	Black-tailed bumble bee	British Columbia	Canada	2014-04-18	Female	3240	Verified	2014-11-07	8	melanopygus !	Website
	1684	bee	1398	Unknown	Not a bumble bee	Oregon	United States	2014-05-01	Not Determined	4850	Invalid	2017-11-16	25	melanopygus	Website
	1685	bee	1401	flavifrons	Yellow head bumble bee	Washington	United States	2014-05-08	Female	5993	Verified	2017-09-25	25	sp.	Website
	1686	bee	1402	melanopygus	Black-tailed bumble bee	Washington	United States	2014-05-08	Female	5993	Verified	2017-09-25	25	sp.	Website
	1687	bee	1403	impatiens	Common eastern bumble bee	Ohio	United States	2014-05-08	Female	5141	Verified	2016-02-21	14	impatiens !	Website
	1688	bee	1404	griseocollis	Brown-belted bumble bee	Idaho	United States	2014-05-08	Female	6778	Verified	2017-08-09	27	vagans	Website
	1689	bee	1405	Unknown	Not a bumble bee	Oregon	United States	2014-05-08	Male	4734	Invalid	2014-09-29	8	sp.	Website
	1690	bee	1406	sp.	Bumble bee	Oregon	United States	2014-05-01	Female	4850	Verified	2017-11-21	25	vosnesenskii	Website
	1691	bee	1407	pensylvanicus	American bumble bee	Oklahoma	United States	2014-05-07	Female	6000	Verified	2017-12-04	27	auricomus	Website
	1692	bee	1408	bifarius	Two-form bumble bee	Idaho	United States	2014-05-08	Male	6778	Verified	2014-10-06	27	bifarius !	Website
	1693	bee	1409	impatiens	Common eastern bumble bee	Oklahoma	United States	2014-05-07	Female	6000	Verified	2017-12-04	27	sp.	Website
	1694	bee	1410	Unknown	Not a bumble bee	South Carolina	United States	2014-05-07	Male	2806	Invalid	2014-09-15	8	sp.	Website
	1695	bee	1411	impatiens	Common eastern bumble bee	Nebraska	United States	2014-05-07	Female	7373	Verified	2017-03-31	25	impatiens	Website
	1696	bee	1413	rufocinctus	Red-belted bumble bee	Washington	United States	2014-05-08	Female	5192	Verified	2017-09-25	25	rufocinctus	Website
	1697	bee	1414	flavifrons	Yellow head bumble bee	Oregon	United States	2014-05-07	Female	4008	Verified	2017-11-16	25	flavifrons	Website
	1698	bee	1415	ternarius	Tri-colored bumble bee	Alberta	Canada	2014-05-08	Female	2856	Verified	2017-12-04	27	ternarius	Website
	1699	bee	1416	flavifrons	Yellow head bumble bee	Oregon	United States	2014-05-07	Female	4008	Verified	2017-11-16	25	flavifrons	Website
	1700	bee	1417	Unknown	Not a bumble bee	Ohio	United States	2014-05-08	Male	5998	Invalid	2014-09-08	8	sp.	Website
	1701	bee	1418	pensylvanicus	American bumble bee	Oklahoma	United States	2014-05-08	Female	5863	Verified	2017-12-04	27	sp.	Website
	1702	bee	1419	Unknown	Not a bumble bee	Oregon	United States	2014-04-26	Female	5648	Invalid	2015-02-02	8	sp.	Website
	1703	bee	1420	Unknown	Not a bumble bee	Oregon	United States	2014-05-07	Not Determined	5190	Invalid	2017-11-23	25	sp.	Website
	1704	bee	1421	sp.	Bumble bee	Oregon	United States	2014-05-07	Female	5190	Verified	2017-11-21	25	vosnesenskii	Website
	1705	bee	1422	melanopygus	Black-tailed bumble bee	Oregon	United States	2014-05-07	Female	6952	Verified	2014-10-06	8	melanopygus !	Website
	1706	bee	1423	vosnesenskii	Yellow-faced bumble bee	Oregon	United States	2014-05-07	Female	6952	Verified	2015-02-09	27	vosnesenskii !	Website
	1707	bee	1424	impatiens	Common eastern bumble bee	Michigan	United States	2014-05-05	Female	5565	Verified	2017-12-04	27	sp.	Website
	1708	bee	1425	cryptarum	Cryptic bumble bee	Alberta	Canada	2014-05-09	Female	2856	Verified	2014-11-03	27	cryptarum !	Website
	1709	bee	1426	Unknown	Not a bumble bee	New Hampshire	United States	2014-05-09	Female	2131	Invalid	2017-12-04	27	impatiens	Website
	1710	bee	1427	vosnesenskii or caliginosus	Yellow-faced group	California	United States	2014-05-09	Female	4870	Verified	2015-02-26	27	vosnesenskii or caliginosus !	Website
	1711	bee	1428	bimaculatus	Two-spotted bumble bee	Tennessee	United States	2014-05-09	Female	5220	Verified	2014-07-10	23	affinis	Website
	1712	bee	1429	bimaculatus	Two-spotted bumble bee	Pennsylvania	United States	2014-05-09	Female	5352	Verified	2017-06-23	25	bimaculatus	Website
	1713	bee	1430	pensylvanicus	American bumble bee	Kansas	United States	2014-05-07	Female	1962	Verified	2017-12-04	27	pensylvanicus	Website
	1714	bee	1431	melanopygus	Black-tailed bumble bee	California	United States	2014-05-09	Female	535	Verified	2017-12-04	27	melanopygus	Website
	1715	bee	1432	caliginosus	Obscure bumble bee	California	United States	2014-05-09	Female	535	Verified	2017-12-04	27	caliginosus	Website
	1716	bee	1433	griseocollis	Brown-belted bumble bee	Pennsylvania	United States	2014-05-09	Female	7569	Verified	2017-12-04	27	variabilis	Website
	1717	bee	1434	impatiens	Common eastern bumble bee	Michigan	United States	2014-05-09	Female	1165	Verified	2017-03-31	25	impatiens	Website
	1718	bee	1435	Unknown	Not a bumble bee	Ontario	Canada	2014-05-10	Male	2771	Invalid	2014-09-08	8	sp.	Website
	1719	bee	1436	sp.	Bumble bee	Idaho	United States	2014-05-10	Female	3703	Verified	2017-08-09	27	fervidus	Website
	1720	bee	1437	vosnesenskii	Yellow-faced bumble bee	Washington	United States	2014-05-07	Female	3987	Verified	2015-02-26	27	vosnesenskii !	Website
	1721	bee	1438	impatiens	Common eastern bumble bee	Wisconsin	United States	2014-05-10	Female	7152	Verified	2017-12-04	27	fervidus	Website
	1722	bee	1439	melanopygus	Black-tailed bumble bee	Oregon	United States	2014-05-10	Female	6903	Verified	2014-10-16	27	melanopygus !	Website
	1723	bee	1440	impatiens	Common eastern bumble bee	New Hampshire	United States	2014-05-10	Female	4189	Verified	2017-03-31	25	impatiens	Website
	1724	bee	1441	melanopygus	Black-tailed bumble bee	Washington	United States	2014-05-10	Female	2212	Verified	2017-09-26	25	sp.	Website
	1725	bee	1442	melanopygus	Black-tailed bumble bee	California	United States	2014-04-20	Male	1732	Verified	2014-09-29	8	occidentalis	Website
	1726	bee	1443	Unknown	Not a bumble bee	California	United States	2014-05-10	Male	1557	Invalid	2014-09-22	8	sp.	Website
	1727	bee	1444	melanopygus	Black-tailed bumble bee	California	United States	2014-04-20	Male	1732	Verified	2014-09-29	8	occidentalis	Website
	1728	bee	1445	melanopygus	Black-tailed bumble bee	California	United States	2014-04-20	Female	1732	Verified	2014-09-29	27	melanopygus !	Website
	1729	bee	1446	flavifrons	Yellow head bumble bee	British Columbia	Canada	2014-05-10	Female	3240	Verified	2017-12-04	27	flavifrons	Website
	1730	bee	1447	vosnesenskii	Yellow-faced bumble bee	British Columbia	Canada	2014-05-10	Female	3240	Verified	2017-12-04	27	vosnesenskii	Website
	1731	bee	1448	bimaculatus	Two-spotted bumble bee	Minnesota	United States	2014-05-10	Female	7498	Verified	2015-09-03	7	bimaculatus !	Website
	1732	bee	1449	vosnesenskii	Yellow-faced bumble bee	Oregon	United States	2014-05-06	Female	7927	Verified	2017-11-21	25	vosnesenskii	Website
	1733	bee	1450	vagans, sandersoni or perplexus	Two-yellow striped group	Massachusetts	United States	2014-05-05	Female	5333	Verified	2017-12-04	27	sp.	Website
	1734	bee	1451	mixtus	Fuzzy-horned bumble bee	Washington	United States	2014-05-10	Female	1930	Verified	2017-09-26	25	mixtus	Website
	1735	bee	1452	mixtus	Fuzzy-horned bumble bee	Washington	United States	2014-05-10	Female	1930	Verified	2017-09-26	25	mixtus	Website
	1736	bee	1453	mixtus	Fuzzy-horned bumble bee	Washington	United States	2014-05-10	Female	722	Tentative	2017-09-26	25	sp.	Website
	1737	bee	1454	melanopygus	Black-tailed bumble bee	Washington	United States	2014-05-10	Female	722	Verified	2014-11-07	8	melanopygus !	Website
	1738	bee	1455	vosnesenskii or caliginosus	Yellow-faced group	Washington	United States	2014-05-10	Female	722	Verified	2017-09-26	25	insularis	Website
	1739	bee	1456	mixtus	Fuzzy-horned bumble bee	Washington	United States	2014-05-10	Female	1930	Tentative	2017-09-26	25	sp.	Website
	1740	bee	1457	flavifrons	Yellow head bumble bee	Washington	United States	2014-05-10	Female	722	Verified	2017-09-26	25	sp.	Website
	1741	bee	1458	sitkensis	Sitka bumble bee	Washington	United States	2014-05-10	Female	722	Tentative	2017-09-26	25	sp.	Website
	1742	bee	1459	sp.	Bumble bee	Alaska	United States	2014-05-10	Male	5815	Verified	2014-10-06	27	sp. !	Website
	1743	bee	1460	Unknown	Not a bumble bee	Manitoba	Canada	2013-05-23	Female	2958	Invalid	2017-12-04	27	sp.	Website
	1744	bee	1461	griseocollis	Brown-belted bumble bee	Oklahoma	United States	2014-05-09	Female	7163	Verified	2017-12-04	27	griseocollis	Website
	1745	bee	1462	fraternus	Southern plains bumble bee	Oklahoma	United States	2014-05-09	Female	7163	Verified	2017-12-04	27	fraternus	Website
	1746	bee	1463	impatiens	Common eastern bumble bee	Oklahoma	United States	2014-05-09	Female	7163	Verified	2017-03-31	25	impatiens	Website
	1747	bee	1464	sp.	Bumble bee	Oklahoma	United States	2014-05-09	Female	7163	Verified	2018-01-17	34	pensylvanicus	Website
	1748	bee	1465	impatiens	Common eastern bumble bee	Oklahoma	United States	2014-05-09	Female	7163	Verified	2017-03-31	25	impatiens	Website
	1749	bee	1467	impatiens	Common eastern bumble bee	Oklahoma	United States	2014-05-09	Female	7163	Verified	2017-03-31	25	impatiens	Website
	1750	bee	1468	pensylvanicus	American bumble bee	Oklahoma	United States	2014-05-09	Female	7163	Verified	2017-12-04	27	pensylvanicus	Website
	1751	bee	1469	pensylvanicus	American bumble bee	Oklahoma	United States	2014-05-09	Female	7163	Verified	2017-12-04	27	pensylvanicus	Website
	1752	bee	1471	griseocollis	Brown-belted bumble bee	Ontario	Canada	2014-05-11	Female	7626	Verified	2017-06-12	34	griseocollis	Website
	1753	bee	1472	huntii	Hunt's bumble bee	Oregon	United States	2010-04-25	Female	1152	Verified	2015-02-05	27	huntii !	Website
	1754	bee	1473	melanopygus	Black-tailed bumble bee	Oregon	United States	2014-05-11	Female	3737	Verified	2014-10-06	8	melanopygus !	Website
	1755	bee	1474	vosnesenskii	Yellow-faced bumble bee	Washington	United States	2014-05-11	Female	3987	Verified	2017-09-26	25	sp.	Website
	1756	bee	1475	melanopygus	Black-tailed bumble bee	Washington	United States	2014-05-11	Female	3987	Verified	2014-11-07	8	melanopygus !	Website
	1757	bee	1476	Unknown	Not a bumble bee	New Jersey	United States	2014-05-11	Male	3272	Invalid	2014-09-08	8	sp.	Website
	1758	bee	1477	Unknown	Not a bumble bee	Ontario	Canada	2014-05-11	Female	4845	Invalid	2016-10-25	27	affinis	Website
	1759	bee	1478	Unknown	Not a bumble bee	Ontario	Canada	2014-05-11	Female	4845	Invalid	2016-10-25	27	affinis	Website
	1760	bee	1479	griseocollis	Brown-belted bumble bee	New York	United States	2014-05-11	Female	4664	Verified	2017-12-04	27	impatiens	Website
	1761	bee	1480	huntii	Hunt's bumble bee	Colorado	United States	2014-05-11	Female	661	Verified	2017-12-04	27	sylvicola	Website
	1762	bee	1481	Unknown	Not a bumble bee	Minnesota	United States	2014-05-11	Female	7657	Invalid	2016-04-29	7	sp.	Website
	1763	bee	1482	Unknown	Not a bumble bee	Massachusetts	United States	2014-05-11	Female	306	Invalid	2017-12-04	27	griseocollis	Website
	1764	bee	1483	Unknown	Not a bumble bee	Michigan	United States	2014-05-11	Male	5480	Invalid	2014-09-08	8	sp.	Website
	1765	bee	1484	impatiens	Common eastern bumble bee	Nova Scotia	Canada	2014-05-11	Female	1261	Verified	2017-03-31	25	impatiens	Website
	1766	bee	1485	impatiens	Common eastern bumble bee	Nova Scotia	Canada	2014-05-11	Female	1261	Verified	2017-03-31	25	impatiens	Website
	1767	bee	1486	impatiens	Common eastern bumble bee	Arkansas	United States	2014-05-11	Female	1405	Verified	2017-12-04	27	sp.	Website
	1768	bee	1487	impatiens	Common eastern bumble bee	Nova Scotia	Canada	2014-05-04	Female	1261	Verified	2017-03-31	25	impatiens	Website
	1769	bee	1488	Unknown	Not a bumble bee	Massachusetts	United States	2014-05-11	Male	306	Invalid	2014-09-22	8	sp.	Website
	1770	bee	1489	vosnesenskii	Yellow-faced bumble bee	California	United States	2014-05-11	Female	1732	Verified	2015-02-26	27	vosnesenskii !	Website
	1771	bee	1490	sp.	Bumble bee	Idaho	United States	2014-05-11	Not Determined	3241	Verified	2017-08-09	27	kirbiellus	Website
	1772	bee	1491	sp.	Bumble bee	Washington	United States	2014-05-11	Female	25	Verified	2014-11-07	8	sp. !	Website
	1773	bee	1492	impatiens	Common eastern bumble bee	Ontario	Canada	2014-05-11	Female	1887	Verified	2017-02-18	28	impatiens	Website
	1774	bee	1493	melanopygus	Black-tailed bumble bee	Washington	United States	2014-05-11	Female	3987	Verified	2014-11-07	8	melanopygus !	Website
	1775	bee	1494	occidentalis	Western bumble bee	Washington	United States	2014-05-11	Female	6855	Verified	2014-05-12	27	occidentalis !	Website
	1776	bee	1495	bimaculatus	Two-spotted bumble bee	Wisconsin	United States	2014-05-10	Female	6653	Verified	2014-05-27	30	bimaculatus !	Website
	1777	bee	1496	melanopygus	Black-tailed bumble bee	Washington	United States	2014-05-11	Female	3987	Verified	2014-11-07	8	melanopygus !	Website
	1778	bee	1497	vosnesenskii	Yellow-faced bumble bee	Washington	United States	2014-05-11	Female	3987	Verified	2015-02-26	27	vosnesenskii !	Website
	1779	bee	1498	vosnesenskii	Yellow-faced bumble bee	Washington	United States	2014-05-11	Female	3987	Verified	2015-02-26	27	vosnesenskii !	Website
	1780	bee	1499	vosnesenskii	Yellow-faced bumble bee	Washington	United States	2014-05-11	Female	3987	Verified	2015-02-26	27	vosnesenskii !	Website
	1781	bee	1500	mixtus	Fuzzy-horned bumble bee	Washington	United States	2014-05-06	Female	5861	Verified	2017-09-26	25	sp.	Website
	1782	bee	1501	flavifrons	Yellow head bumble bee	Washington	United States	2014-05-06	Female	5861	Verified	2017-09-26	25	sp.	Website
	1783	bee	1503	mixtus	Fuzzy-horned bumble bee	Washington	United States	2014-05-07	Female	5861	Verified	2017-09-26	25	sp.	Website
	1784	bee	1504	sp.	Bumble bee	Washington	United States	2014-05-07	Female	5861	Verified	2017-09-26	25	sp.	Website
	1785	bee	1505	vosnesenskii or caliginosus	Yellow-faced group	Washington	United States	2014-05-09	Female	5861	Verified	2015-02-26	27	vosnesenskii or caliginosus !	Website
	1786	bee	1506	sp.	Bumble bee	Washington	United States	2014-05-11	Female	5861	Verified	2017-09-26	25	sp.	Website
	1787	bee	1507	Unknown	Not a bumble bee	Virginia	United States	2014-05-12	Male	6674	Invalid	2014-05-13	27	sp.	Website
	1788	bee	1508	pensylvanicus	American bumble bee	Texas	United States	2014-05-10	Female	1161	Verified	2014-05-13	27	pensylvanicus !	Website
	1789	bee	1509	griseocollis	Brown-belted bumble bee	Texas	United States	2014-05-10	Female	1161	Verified	2014-05-13	27	griseocollis !	Website
	1790	bee	1510	sp.	Bumble bee	Washington	United States	2014-05-11	Female	4316	Verified	2014-05-13	27	sp. !	Website
	1791	bee	1511	impatiens	Common eastern bumble bee	Michigan	United States	2014-05-10	Female	1165	Verified	2014-05-13	27	impatiens !	Website
	1792	bee	1512	vosnesenskii	Yellow-faced bumble bee	Washington	United States	2014-05-11	Female	4316	Verified	2014-05-13	27	vosnesenskii !	Website
	1793	bee	1513	impatiens	Common eastern bumble bee	Michigan	United States	2014-05-10	Female	1165	Verified	2014-05-13	27	impatiens !	Website
	1794	bee	1514	melanopygus	Black-tailed bumble bee	Oregon	United States	2014-05-11	Female	7342	Verified	2015-02-05	27	melanopygus !	Website
	1795	bee	1515	sp.	Bumble bee	Oregon	United States	2014-05-12	Female	4754	Verified	2014-05-13	27	sp. !	Website
	1796	bee	1516	sp.	Bumble bee	Oregon	United States	2014-05-12	Female	4249	Verified	2014-05-13	27	sp. !	Website
	1797	bee	1517	vosnesenskii	Yellow-faced bumble bee	California	United States	2014-01-14	Female	2728	Verified	2014-05-13	27	vosnesenskii !	Website
	1798	bee	1518	fervidus	Yellow bumble bee	Oregon	United States	2014-05-11	Female	7342	Verified	2014-05-13	27	fervidus !	Website
	1799	bee	1519	sp.	Bumble bee	California	United States	2014-05-04	Male	7421	Verified	2014-05-13	27	sp. !	Website
	1800	bee	1520	sp.	Bumble bee	Oregon	United States	2014-05-11	Female	4833	Verified	2014-05-13	27	sp. !	Website
	1801	bee	1521	impatiens	Common eastern bumble bee	Tennessee	United States	2013-08-21	Female	3692	Verified	2014-05-13	27	impatiens !	Website
	1802	bee	1522	Unknown	Not a bumble bee	New Jersey	United States	2014-05-12	Male	4067	Invalid	2014-05-13	27	sp.	Website
	1803	bee	1523	bimaculatus	Two-spotted bumble bee	Ontario	Canada	2014-05-12	Female	3218	Verified	2017-06-12	34	bimaculatus	Website
	1804	bee	1524	bimaculatus	Two-spotted bumble bee	Ontario	Canada	2014-05-12	Female	4212	Verified	2017-06-12	34	bimaculatus	Website
	1805	bee	1525	impatiens	Common eastern bumble bee	New York	United States	2014-05-12	Female	4664	Verified	2014-05-13	27	impatiens !	Website
	1806	bee	1526	sp.	Bumble bee	Vermont	United States	2014-05-12	Not Determined	7207	Verified	2017-12-04	27	vagans	Website
	1807	bee	1527	mixtus	Fuzzy-horned bumble bee	Oregon	United States	2014-05-12	Female	1127	Verified	2014-05-13	27	mixtus !	Website
	1808	bee	1528	melanopygus	Black-tailed bumble bee	Idaho	United States	2014-05-12	Female	7376	Verified	2014-05-13	27	melanopygus !	Website
	1809	bee	1529	mixtus	Fuzzy-horned bumble bee	Idaho	United States	2014-05-12	Female	7376	Verified	2017-08-09	27	rufocinctus	Website
	1810	bee	1530	Unknown	Not a bumble bee	Oregon	United States	2014-05-10	Male	5190	Invalid	2014-05-14	27	vosnesenskii	Website
	1811	bee	1531	bimaculatus	Two-spotted bumble bee	Indiana	United States	2014-05-12	Female	4385	Verified	2017-12-04	27	sp.	Website
	1812	bee	1532	bimaculatus	Two-spotted bumble bee	Minnesota	United States	2014-05-11	Female	7300	Verified	2014-05-14	27	bimaculatus !	Website
	1813	bee	1533	impatiens	Common eastern bumble bee	Nebraska	United States	2014-05-11	Female	5244	Verified	2017-12-04	27	sp.	Website
	1814	bee	1534	Unknown	Not a bumble bee	Alabama	United States	2014-05-13	Male	6752	Invalid	2014-05-14	27	sp.	Website
	1815	bee	1535	Unknown	Not a bumble bee	Alberta	Canada	2014-05-12	Female	2856	Invalid	2017-12-04	27	perplexus	Website
	1816	bee	1536	sp.	Bumble bee	Washington	United States	2014-05-13	Male	4099	Verified	2014-05-14	27	sp. !	Website
	1817	bee	1537	flavifrons	Yellow head bumble bee	Washington	United States	2014-05-13	Female	4355	Verified	2017-09-26	25	flavifrons	Website
	1818	bee	1538	melanopygus	Black-tailed bumble bee	Washington	United States	2014-05-13	Female	4355	Verified	2014-11-07	8	melanopygus !	Website
	1819	bee	1539	vosnesenskii	Yellow-faced bumble bee	Washington	United States	2014-05-10	Female	4355	Verified	2014-05-14	27	vosnesenskii !	Website
	1820	bee	1540	mixtus	Fuzzy-horned bumble bee	Oregon	United States	2014-05-13	Female	8488	Verified	2014-05-14	27	mixtus !	Website
	1821	bee	1541	Unknown	Not a bumble bee	Arizona	United States	2014-04-21	Male	374	Invalid	2014-05-14	27	sp.	Website
	1822	bee	1542	melanopygus	Black-tailed bumble bee	Oregon	United States	2014-05-13	Female	1038	Verified	2014-05-14	27	melanopygus !	Website
	1823	bee	1543	mixtus	Fuzzy-horned bumble bee	Oregon	United States	2014-05-13	Female	1870	Verified	2014-05-14	27	mixtus !	Website
	1824	bee	1544	sp.	Bumble bee	Wisconsin	United States	2014-05-10	Female	2894	Verified	2014-05-14	27	sp. !	Website
	1825	bee	1545	sp.	Bumble bee	Oregon	United States	2014-05-13	Female	1016	Verified	2017-11-15	25	fervidus	Website
	1826	bee	1546	sp.	Bumble bee	Maryland	United States	2014-05-10	Female	439	Verified	2017-12-04	27	bimaculatus	Website
	1827	bee	1547	sp.	Bumble bee	Maryland	United States	2014-05-10	Female	439	Verified	2017-12-04	27	bimaculatus	Website
	1828	bee	1548	borealis	Northern amber bumble bee	Minnesota	United States	2013-08-05	Female	7498	Verified	2014-05-14	27	borealis !	Website
	1829	bee	1549	huntii	Hunt's bumble bee	Alberta	Canada	2014-05-13	Female	2136	Verified	2014-05-14	27	huntii !	Website
	1830	bee	1550	vosnesenskii	Yellow-faced bumble bee	Oregon	United States	2014-05-13	Female	5784	Verified	2017-11-21	25	insularis	Website
	1831	bee	1551	melanopygus	Black-tailed bumble bee	Oregon	United States	2014-05-13	Female	5784	Verified	2014-05-14	27	melanopygus !	Website
	1832	bee	1552	flavifrons	Yellow head bumble bee	Oregon	United States	2014-05-13	Female	5784	Verified	2014-05-14	27	flavifrons !	Website
	1833	bee	1553	sp.	Bumble bee	Virginia	United States	2014-05-13	Female	2441	Verified	2014-05-14	27	sp. !	Website
	1834	bee	1554	impatiens	Common eastern bumble bee	Massachusetts	United States	2014-05-10	Female	2618	Verified	2014-05-14	27	impatiens !	Website
	1835	bee	1555	impatiens	Common eastern bumble bee	Ontario	Canada	2014-05-14	Female	7848	Verified	2017-12-04	27	sp.	Website
	1836	bee	1556	impatiens	Common eastern bumble bee	Michigan	United States	2014-05-13	Female	918	Verified	2016-01-09	14	impatiens !	Website
	1837	bee	1557	bimaculatus	Two-spotted bumble bee	New Jersey	United States	2014-05-11	Female	4606	Verified	2014-05-14	27	bimaculatus !	Website
	1838	bee	1558	melanopygus	Black-tailed bumble bee	Oregon	United States	2014-05-14	Female	5171	Verified	2014-10-06	8	melanopygus !	Website
	1839	bee	1559	Unknown	Not a bumble bee	California	United States	2014-05-14	Male	8474	Invalid	2014-09-08	8	sp.	Website
	1840	bee	1560	griseocollis	Brown-belted bumble bee	Texas	United States	2014-05-13	Not Determined	1161	Verified	2015-05-18	27	griseocollis !	Website
	1841	bee	1561	ternarius	Tri-colored bumble bee	Alberta	Canada	2014-05-14	Female	2136	Verified	2017-12-04	27	ternarius	Website
	1842	bee	1562	Unknown	Not a bumble bee	Alberta	Canada	2014-05-14	Female	2136	Invalid	2017-12-04	27	sp.	Website
	1843	bee	1563	melanopygus	Black-tailed bumble bee	Washington	United States	2014-05-12	Female	5861	Verified	2017-09-26	25	rufocinctus	Website
	1844	bee	1564	Unknown	Not a bumble bee	Washington	United States	2014-05-13	Male	5861	Invalid	2014-09-08	8	sp.	Website
	1845	bee	1565	melanopygus	Black-tailed bumble bee	Washington	United States	2014-05-14	Female	5861	Verified	2014-05-18	27	melanopygus !	Website
	1846	bee	1566	impatiens	Common eastern bumble bee	Pennsylvania	United States	2014-05-10	Female	472	Verified	2014-05-18	27	impatiens !	Website
	1847	bee	1567	Unknown	Not a bumble bee	California	United States	2014-04-20	Male	6679	Invalid	2014-05-18	27	sp.	Website
	1848	bee	1568	griseocollis	Brown-belted bumble bee	Oregon	United States	2014-05-14	Female	3340	Verified	2014-05-18	27	griseocollis !	Website
	1849	bee	1569	vagans	Half-black bumble bee	Idaho	United States	2014-05-13	Female	7376	Verified	2017-08-09	27	vagans	Website
	1850	bee	1570	fervidus	Yellow bumble bee	Idaho	United States	2014-05-14	Female	6778	Verified	2014-05-18	27	fervidus !	Website
	1851	bee	1571	sp.	Bumble bee	Idaho	United States	2014-05-14	Female	6778	Verified	2014-05-18	27	sp. !	Website
	1852	bee	1572	huntii	Hunt's bumble bee	Idaho	United States	2014-05-14	Female	6778	Verified	2014-05-18	27	huntii !	Website
	1853	bee	1573	sp.	Bumble bee	Washington	United States	2014-05-14	Female	4207	Verified	2014-05-18	27	sp. !	Website
	1854	bee	1574	impatiens	Common eastern bumble bee	Michigan	United States	2014-05-04	Female	1902	Verified	2014-05-18	27	impatiens !	Website
	1855	bee	1575	centralis	Central bumble bee	Idaho	United States	2014-05-15	Female	8317	Verified	2014-05-18	27	centralis !	Website
	1856	bee	1576	Unknown	Not a bumble bee	New Jersey	United States	2014-05-11	Male	3911	Invalid	2014-05-18	27	impatiens	Website
	1857	bee	1577	griseocollis	Brown-belted bumble bee	New Hampshire	United States	2014-05-15	Female	3237	Verified	2014-05-18	27	griseocollis !	Website
	1858	bee	1578	huntii	Hunt's bumble bee	Idaho	United States	2014-05-15	Female	8317	Verified	2014-05-18	27	huntii !	Website
	1859	bee	1579	mixtus	Fuzzy-horned bumble bee	Washington	United States	2014-05-15	Male	5861	Verified	2014-05-19	27	mixtus !	Website
	1860	bee	1580	vosnesenskii	Yellow-faced bumble bee	Washington	United States	2014-05-15	Female	5861	Verified	2014-05-18	27	vosnesenskii !	Website
	1861	bee	1581	sp.	Bumble bee	Washington	United States	2014-05-15	Female	5861	Verified	2014-05-18	27	sp. !	Website
	1862	bee	1582	flavifrons	Yellow head bumble bee	Washington	United States	2014-05-15	Female	5861	Verified	2014-05-18	27	flavifrons !	Website
	1863	bee	1583	sp.	Bumble bee	Washington	United States	2014-05-15	Male	5861	Verified	2014-05-18	27	sp. !	Website
	1864	bee	1584	melanopygus	Black-tailed bumble bee	Washington	United States	2014-05-15	Female	5861	Verified	2014-05-18	27	melanopygus !	Website
	1865	bee	1585	vosnesenskii	Yellow-faced bumble bee	Washington	United States	2014-05-15	Female	5861	Verified	2014-05-18	27	vosnesenskii !	Website
	1866	bee	1586	sp.	Bumble bee	Minnesota	United States	2014-05-14	Female	572	Verified	2014-05-18	27	sp. !	Website
	1867	bee	1587	melanopygus	Black-tailed bumble bee	British Columbia	Canada	2011-08-17	Female	4357	Verified	2014-05-18	27	melanopygus !	Website
	1868	bee	1588	sp.	Bumble bee	British Columbia	Canada	2011-08-23	Female	4357	Verified	2014-05-18	27	sp. !	Website
	1869	bee	1589	Unknown	Not a bumble bee	British Columbia	Canada	2011-08-29	Female	4357	Invalid	2017-12-04	27	ternarius	Website
	1870	bee	1590	centralis	Central bumble bee	Alberta	Canada	2014-05-15	Female	8414	Verified	2014-05-18	27	centralis !	Website
	1871	bee	1591	occidentalis	Western bumble bee	Alberta	Canada	2014-05-14	Female	8414	Verified	2014-05-18	27	occidentalis !	Website
	1872	bee	1592	huntii	Hunt's bumble bee	Alberta	Canada	2014-05-15	Female	8414	Verified	2014-05-18	27	huntii !	Website
	1873	bee	1593	sp.	Bumble bee	California	United States	2014-05-15	Female	7004	Verified	2014-05-18	27	sp. !	Website
	1874	bee	1594	melanopygus	Black-tailed bumble bee	Oregon	United States	2014-05-14	Male	1127	Verified	2014-05-18	27	melanopygus !	Website
	1875	bee	1595	impatiens	Common eastern bumble bee	Michigan	United States	2014-05-13	Female	5565	Verified	2014-05-18	27	impatiens !	Website
	1876	bee	1596	sp.	Bumble bee	British Columbia	Canada	2013-08-09	Female	4357	Verified	2014-05-18	27	sp. !	Website
	1877	bee	1597	bifarius	Two-form bumble bee	British Columbia	Canada	2013-08-09	Female	4357	Verified	2014-05-18	27	bifarius !	Website
	1878	bee	1598	sp.	Bumble bee	British Columbia	Canada	2014-03-24	Female	4357	Verified	2014-05-18	27	flavifrons	Website
	1879	bee	1599	sp.	Bumble bee	British Columbia	Canada	2014-03-24	Female	4357	Verified	2014-05-18	27	sp. !	Website
	1880	bee	1600	sp.	Bumble bee	British Columbia	Canada	2014-03-24	Female	4357	Verified	2014-05-18	27	melanopygus	Website
	1881	bee	1601	melanopygus	Black-tailed bumble bee	Oregon	United States	2014-05-16	Female	7167	Verified	2014-05-18	27	bifarius	Website
	1882	bee	1602	sp.	Bumble bee	Oregon	United States	2014-05-14	Male	1678	Verified	2014-05-18	27	sp. !	Website
	1883	bee	1603	vosnesenskii	Yellow-faced bumble bee	Oregon	United States	2014-05-14	Female	858	Verified	2014-05-18	27	vosnesenskii !	Website
	1884	bee	1604	sp.	Bumble bee	Washington	United States	2014-05-09	Female	3011	Verified	2014-05-18	27	sp. !	Website
	1885	bee	1605	bimaculatus	Two-spotted bumble bee	Pennsylvania	United States	2014-05-16	Female	5352	Verified	2014-05-18	27	bimaculatus !	Website
	1886	bee	1606	melanopygus	Black-tailed bumble bee	Washington	United States	2014-05-16	Female	3987	Verified	2014-05-18	27	melanopygus !	Website
	1887	bee	1607	vosnesenskii	Yellow-faced bumble bee	Washington	United States	2014-05-16	Female	3987	Verified	2014-05-18	27	vosnesenskii !	Website
	1888	bee	1608	melanopygus	Black-tailed bumble bee	Washington	United States	2014-05-16	Male	3987	Verified	2014-05-18	27	melanopygus !	Website
	1889	bee	1609	sp.	Bumble bee	Washington	United States	2014-05-16	Female	25	Verified	2014-05-18	27	sp. !	Website
	1890	bee	1610	vosnesenskii	Yellow-faced bumble bee	Oregon	United States	2014-05-14	Female	6729	Verified	2014-05-18	27	vosnesenskii !	Website
	1891	bee	1611	vosnesenskii	Yellow-faced bumble bee	Nevada	United States	2014-05-14	Female	5647	Verified	2014-05-18	27	vosnesenskii !	Website
	1892	bee	1612	melanopygus	Black-tailed bumble bee	British Columbia	Canada	2014-04-04	Female	4357	Verified	2014-05-18	27	melanopygus !	Website
	1893	bee	1613	pensylvanicus	American bumble bee	Texas	United States	2012-08-09	Female	3477	Verified	2014-05-18	27	auricomus	Website
	1894	bee	1614	Unknown	Not a bumble bee	New Jersey	United States	2014-05-17	Male	4067	Invalid	2014-05-18	27	sp.	Website
	1895	bee	1615	impatiens	Common eastern bumble bee	Michigan	United States	2014-05-15	Female	5095	Verified	2014-05-18	27	impatiens !	Website
	1896	bee	1617	sp.	Bumble bee	British Columbia	Canada	2014-04-28	Male	4357	Verified	2014-05-18	27	sp. !	Website
	1897	bee	1619	melanopygus	Black-tailed bumble bee	Oregon	United States	2014-05-10	Female	4059	Verified	2014-05-18	27	bifarius	Website
	1898	bee	1620	fervidus	Yellow bumble bee	Oregon	United States	2014-05-10	Female	3992	Verified	2017-11-15	25	fervidus	Website
	1899	bee	1621	bimaculatus	Two-spotted bumble bee	Maine	United States	2014-05-10	Female	1060	Verified	2017-12-04	27	griseocollis	Website
	1900	bee	1622	huntii	Hunt's bumble bee	Alberta	Canada	2014-05-14	Female	8224	Verified	2014-05-18	27	huntii !	Website
	1901	bee	1623	Unknown	Not a bumble bee	Texas	United States	2014-05-17	Male	5079	Invalid	2014-05-18	27	sp.	Website
	1902	bee	1624	Unknown	Not a bumble bee	New Brunswick	Canada	2014-05-17	Male	7315	Invalid	2014-05-18	27	sp.	Website
	1903	bee	1625	vosnesenskii	Yellow-faced bumble bee	California	United States	2014-05-17	Female	8105	Verified	2014-05-18	27	vosnesenskii !	Website
	1904	bee	1626	sp.	Bumble bee	Kentucky	United States	2014-05-17	Male	507	Verified	2014-05-18	27	sp. !	Website
	1905	bee	1627	Unknown	Not a bumble bee	Texas	United States	2014-05-17	Male	5079	Invalid	2014-05-18	27	sp.	Website
	1906	bee	1628	Unknown	Not a bumble bee	Texas	United States	2014-05-17	Male	5079	Invalid	2014-05-18	27	sp.	Website
	1907	bee	1630	sp.	Bumble bee	British Columbia	Canada	2011-08-29	Female	4357	Verified	2014-05-18	27	ternarius	Website
	1908	bee	1631	impatiens	Common eastern bumble bee	Ontario	Canada	2014-05-17	Female	5396	Verified	2014-05-18	27	impatiens !	Website
	1909	bee	1632	melanopygus	Black-tailed bumble bee	Washington	United States	2014-05-17	Female	6260	Verified	2014-05-18	27	sp.	Website
	1910	bee	1633	impatiens	Common eastern bumble bee	Ontario	Canada	2014-05-17	Female	5396	Verified	2014-05-18	27	impatiens !	Website
	1911	bee	1634	sp.	Bumble bee	Oregon	United States	2014-05-17	Female	6833	Verified	2014-05-18	27	sp. !	Website
	1912	bee	1635	griseocollis	Brown-belted bumble bee	Ontario	Canada	2014-05-17	Female	4212	Verified	2014-05-27	30	griseocollis !	Website
	1913	bee	1636	impatiens	Common eastern bumble bee	Michigan	United States	2014-05-17	Female	8288	Verified	2014-05-18	27	impatiens !	Website
	1914	bee	1638	sp.	Bumble bee	Washington	United States	2014-05-17	Female	3046	Verified	2014-05-18	27	sp. !	Website
	1915	bee	1639	bifarius	Two-form bumble bee	Washington	United States	2014-05-17	Female	3046	Verified	2014-05-18	27	bifarius !	Website
	1916	bee	1640	melanopygus	Black-tailed bumble bee	Washington	United States	2014-05-17	Female	6656	Verified	2014-05-18	27	huntii	Website
	1917	bee	1641	impatiens	Common eastern bumble bee	Massachusetts	United States	2013-10-01	Female	4905	Verified	2014-05-18	27	sp.	Website
	1918	bee	1642	nevadensis	Nevada bumble bee	Washington	United States	2014-05-11	Female	3046	Verified	2014-05-18	27	nevadensis !	Website
	1919	bee	1643	sp.	Bumble bee	Nebraska	United States	2014-05-17	Male	5126	Verified	2014-05-18	27	sp. !	Website
	1920	bee	1644	sp.	Bumble bee	Massachusetts	United States	2014-05-18	Female	1492	Verified	2014-05-18	27	sp. !	Website
	1921	bee	1645	nevadensis	Nevada bumble bee	Idaho	United States	2014-05-17	Female	8317	Verified	2014-05-18	27	nevadensis !	Website
	1922	bee	1646	perplexus	Confusing bumble bee	Alberta	Canada	2014-05-18	Female	5497	Tentative	2017-12-04	27	nevadensis	Website
	1923	bee	1647	melanopygus	Black-tailed bumble bee	British Columbia	Canada	2012-05-21	Female	4357	Verified	2014-11-07	8	melanopygus !	Website
	1924	bee	1649	flavifrons	Yellow head bumble bee	British Columbia	Canada	2013-06-01	Male	4357	Verified	2017-12-04	27	flavifrons	Website
	1925	bee	1650	flavifrons	Yellow head bumble bee	British Columbia	Canada	2014-04-09	Female	4357	Verified	2017-12-04	27	flavifrons	Website
	1926	bee	1651	sp.	Bumble bee	British Columbia	Canada	2014-04-09	Not Determined	4357	Verified	2015-03-26	27	sp. !	Website
	1927	bee	1653	impatiens	Common eastern bumble bee	Wisconsin	United States	2014-05-18	Female	5541	Verified	2017-12-04	27	sp.	Website
	1928	bee	1654	impatiens	Common eastern bumble bee	Indiana	United States	2014-05-13	Female	1205	Verified	2016-02-21	14	impatiens !	Website
	1929	bee	1656	impatiens	Common eastern bumble bee	Ontario	Canada	2014-05-18	Female	5396	Verified	2014-05-27	30	impatiens !	Website
	1930	bee	1657	pensylvanicus	American bumble bee	Texas	United States	2014-04-27	Female	3823	Verified	2017-12-04	27	pensylvanicus	Website
	1931	bee	1658	pensylvanicus	American bumble bee	Texas	United States	2014-04-27	Female	3823	Verified	2017-12-04	27	pensylvanicus	Website
	1932	bee	1660	pensylvanicus	American bumble bee	Texas	United States	2014-04-27	Female	3823	Verified	2017-12-04	27	pensylvanicus	Website
	1933	bee	1665	pensylvanicus	American bumble bee	Texas	United States	2014-04-27	Female	3823	Verified	2017-12-04	27	pensylvanicus	Website
	1934	bee	1666	auricomus	Black and gold bumble bee	Texas	United States	2014-05-02	Female	3823	Verified	2017-12-04	27	auricomus	Website
	1935	bee	1667	fraternus	Southern plains bumble bee	Texas	United States	2014-05-02	Female	3823	Verified	2016-05-12	18	fraternus !	Website
	1936	bee	1668	griseocollis	Brown-belted bumble bee	Texas	United States	2014-05-02	Female	3823	Verified	2016-06-15	18	griseocollis !	Website
	1937	bee	1669	griseocollis	Brown-belted bumble bee	Texas	United States	2014-05-02	Female	3823	Verified	2016-05-12	18	griseocollis !	Website
	1938	bee	1671	impatiens	Common eastern bumble bee	Ontario	Canada	2014-05-18	Female	4196	Verified	2017-03-31	25	impatiens	Website
	1939	bee	1672	ternarius	Tri-colored bumble bee	Minnesota	United States	2014-05-18	Female	3759	Verified	2016-06-23	7	ternarius !	Website
	1940	bee	1673	melanopygus	Black-tailed bumble bee	Washington	United States	2014-05-18	Female	7433	Verified	2014-11-07	8	melanopygus !	Website
	1941	bee	1674	impatiens	Common eastern bumble bee	Nova Scotia	Canada	2014-05-15	Female	1956	Verified	2017-03-31	25	impatiens	Website
	1942	bee	1675	vosnesenskii	Yellow-faced bumble bee	Oregon	United States	2014-05-14	Female	4869	Verified	2017-12-04	27	insularis	Website
	1943	bee	1678	impatiens	Common eastern bumble bee	Ontario	Canada	2014-05-18	Female	500	Verified	2014-05-27	30	impatiens !	Website
	1944	bee	1679	centralis	Central bumble bee	Idaho	United States	2014-05-18	Female	1758	Verified	2017-08-09	27	centralis	Website
	1945	bee	1680	huntii	Hunt's bumble bee	Colorado	United States	2014-05-17	Female	4659	Verified	2017-12-04	27	sp.	Website
	1946	bee	1681	melanopygus	Black-tailed bumble bee	Washington	United States	2014-05-19	Female	113	Verified	2017-09-26	25	mixtus	Website
	1947	bee	1682	Unknown	Not a bumble bee	Ontario	Canada	2014-05-19	Male	66	Invalid	2014-05-27	30	affinis	Website
	1948	bee	1683	bimaculatus	Two-spotted bumble bee	Minnesota	United States	2014-05-18	Female	4107	Verified	2015-09-01	7	bimaculatus !	Website
	1949	bee	1684	occidentalis	Western bumble bee	British Columbia	Canada	2014-05-19	Female	4357	Verified	2014-09-29	27	occidentalis !	Website
	1950	bee	1685	Unknown	Not a bumble bee	Oregon	United States	2014-05-19	Male	6942	Invalid	2014-09-08	8	sp.	Website
	1951	bee	1686	fervidus	Yellow bumble bee	Virginia	United States	2014-05-18	Female	239	Verified	2017-12-04	27	pensylvanicus	Website
	1952	bee	1687	sp.	Bumble bee	Oregon	United States	2014-05-19	Female	6283	Verified	2017-11-17	25	vosnesenskii or caliginosus	Website
	1953	bee	1688	mixtus	Fuzzy-horned bumble bee	Washington	United States	2014-05-17	Female	7186	Verified	2017-09-26	25	mixtus	Website
	1954	bee	1689	vosnesenskii or caliginosus	Yellow-faced group	Washington	United States	2014-05-14	Female	7186	Verified	2017-09-26	25	caliginosus	Website
	1955	bee	1690	melanopygus	Black-tailed bumble bee	Washington	United States	2014-05-10	Female	7186	Verified	2017-09-26	25	melanopygus	Website
	1956	bee	1691	bimaculatus	Two-spotted bumble bee	Alabama	United States	2014-05-19	Male	7111	Verified	2019-02-22	23	bimaculatus !	Website
	1957	bee	1692	melanopygus	Black-tailed bumble bee	Oregon	United States	2014-05-19	Female	7191	Verified	2014-10-16	27	melanopygus !	Website
	1958	bee	1693	vosnesenskii or caliginosus	Yellow-faced group	Oregon	United States	2014-05-11	Female	7191	Verified	2017-11-21	25	vosnesenskii	Website
	1959	bee	1694	sp.	Bumble bee	British Columbia	Canada	2014-04-29	Female	4357	Verified	2015-03-26	27	sp. !	Website
	1960	bee	1695	sitkensis	Sitka bumble bee	British Columbia	Canada	2014-05-10	Female	4357	Verified	2017-12-04	27	sp.	Website
	1961	bee	1696	bifarius	Two-form bumble bee	British Columbia	Canada	2014-05-10	Female	4357	Verified	2015-03-26	27	bifarius !	Website
	1962	bee	1697	Unknown	Not a bumble bee	California	United States	2014-05-20	Female	7417	Invalid	2017-12-04	27	rufocinctus	Website
	1963	bee	1698	Unknown	Not a bumble bee	New Jersey	United States	2014-05-15	Not Determined	4573	Invalid	2017-03-31	25	impatiens	Website
	1964	bee	1699	sp.	Bumble bee	Michigan	United States	2014-05-20	Not Determined	5083	Tentative	2019-06-20	27	variabilis	Website
	1965	bee	1700	auricomus	Black and gold bumble bee	Virginia	United States	2012-06-09	Female	239	Verified	2017-12-04	27	auricomus	Website
	1966	bee	1701	Unknown	Not a bumble bee	Ontario	Canada	2014-05-20	Female	5336	Invalid	2017-06-12	34	sp.	Website
	1967	bee	1702	impatiens	Common eastern bumble bee	Minnesota	United States	2014-05-20	Female	4107	Verified	2017-03-12	7	vagans	Website
	1968	bee	1703	sp.	Bumble bee	Ontario	Canada	2014-05-13	Worker	5396	Verified	2017-10-06	34	impatiens	Website
	1969	bee	1704	Unknown	Not a bumble bee	New York	United States	2014-05-19	Female	7196	Invalid	2017-12-04	27	sp.	Website
	1970	bee	1705	ternarius	Tri-colored bumble bee	Minnesota	United States	2014-05-20	Female	3759	Verified	2014-05-22	27	ternarius !	Website
	1971	bee	1706	Unknown	Not a bumble bee	Maine	United States	2014-05-20	Female	5029	Invalid	2017-12-04	27	sp.	Website
	1972	bee	1707	impatiens	Common eastern bumble bee	Maine	United States	2014-05-20	Female	5029	Verified	2014-05-22	27	sp.	Website
	1973	bee	1708	griseocollis	Brown-belted bumble bee	Wisconsin	United States	2014-05-11	Female	6369	Verified	2014-05-22	27	griseocollis !	Website
	1974	bee	1709	griseocollis	Brown-belted bumble bee	Wisconsin	United States	2014-05-20	Female	6369	Verified	2014-05-22	27	impatiens	Website
	1975	bee	1710	sp.	Bumble bee	Washington	United States	2014-05-17	Male	6260	Verified	2014-05-22	27	sp. !	Website
	1976	bee	1711	sp.	Bumble bee	Colorado	United States	2014-05-20	Female	3882	Verified	2014-05-22	27	impatiens	Website
	1977	bee	1712	sandersoni	Sanderson bumble bee	Minnesota	United States	2014-05-20	Female	3759	Verified	2015-09-01	7	sandersoni !	Website
	1978	bee	1713	bimaculatus	Two-spotted bumble bee	Virginia	United States	2014-05-18	Female	4971	Verified	2017-12-04	27	griseocollis	Website
	1979	bee	1714	pensylvanicus	American bumble bee	Wisconsin	United States	2014-05-20	Female	1993	Verified	2017-12-04	27	pensylvanicus	Website
	1980	bee	1715	sp.	Bumble bee	California	United States	2014-05-20	Male	4870	Verified	2014-05-22	27	sp. !	Website
	1981	bee	1716	Unknown	Not a bumble bee	Wyoming	United States	2014-05-20	Male	2557	Invalid	2014-05-22	27	sp.	Website
	1982	bee	1717	huntii	Hunt's bumble bee	Wyoming	United States	2014-05-20	Female	2557	Verified	2014-05-22	27	huntii !	Website
	1983	bee	1718	impatiens	Common eastern bumble bee	Ontario	Canada	2014-05-20	Female	7801	Verified	2014-05-22	27	impatiens !	Website
	1984	bee	1719	sp.	Bumble bee	Oregon	United States	2014-05-20	Female	700	Verified	2014-05-22	27	sp. !	Website
	1985	bee	1720	sp.	Bumble bee	Illinois	United States	2014-05-11	Male	5422	Verified	2014-05-22	27	sp. !	Website
	1986	bee	1721	Unknown	Not a bumble bee	Illinois	United States	2014-05-12	Male	5422	Invalid	2014-05-22	27	fervidus	Website
	1987	bee	1722	mixtus	Fuzzy-horned bumble bee	British Columbia	Canada	2014-05-18	Female	3267	Verified	2014-05-22	27	mixtus !	Website
	1988	bee	1723	ternarius	Tri-colored bumble bee	British Columbia	Canada	2014-05-16	Female	3267	Verified	2014-11-17	27	ternarius !	Website
	1989	bee	1724	bimaculatus	Two-spotted bumble bee	Alabama	United States	2014-05-19	Female	591	Verified	2019-02-22	23	bimaculatus !	Website
	1990	bee	1725	sp.	Bumble bee	Pennsylvania	United States	2014-05-21	Male	1853	Verified	2014-05-22	27	sp. !	Website
	1991	bee	1726	melanopygus	Black-tailed bumble bee	California	United States	2014-05-08	Female	1708	Verified	2014-05-22	27	melanopygus !	Website
	1992	bee	1727	melanopygus	Black-tailed bumble bee	Oregon	United States	2014-05-12	Female	5886	Verified	2014-05-22	27	melanopygus !	Website
	1993	bee	1728	Unknown	Not a bumble bee	Washington	United States	2014-05-20	Female	1697	Invalid	2017-01-20	27	morrisoni	Website
	1994	bee	1729	Unknown	Not a bumble bee	Illinois	United States	2014-05-21	Male	1233	Invalid	2014-05-22	27	sp.	Website
	1995	bee	1730	impatiens	Common eastern bumble bee	Quebec	Canada	2014-05-21	Female	1268	Verified	2014-05-22	27	impatiens !	Website
	1996	bee	1732	griseocollis	Brown-belted bumble bee	Maine	United States	2014-05-21	Female	2476	Verified	2014-05-22	27	griseocollis !	Website
	1997	bee	1733	impatiens	Common eastern bumble bee	Maine	United States	2014-05-21	Female	2476	Verified	2014-05-22	27	impatiens !	Website
	1998	bee	1734	impatiens	Common eastern bumble bee	Ontario	Canada	2014-05-21	Female	211	Verified	2014-05-22	27	auricomus	Website
	1999	bee	1735	impatiens	Common eastern bumble bee	Michigan	United States	2014-05-17	Female	918	Verified	2014-05-22	27	affinis	Website
[truncated: 40,418 more rows]

## Sheet: ver,inv,knownOrigId (incl sp)
edit made from orig export?	newIDnumber	nest or bee observation	Orig Bee/Nest Id Number	Species	Common name	Provinces/States	Country	Date Observed	Sex	observer Code JUST NUMBERS	Status	Determined Date	Determined By JUST NUMBERS	Original Species	Source
	446	bee	6	griseocollis	Brown-belted bumble bee	Georgia	United States	2013-08-25	Female	37	Verified	2014-01-22	16	auricomus	Website
	466	bee	34	Unknown	Not a bumble bee	Ontario	Canada	2013-07-28	Male	2473	Invalid	2014-04-16	30	sp.	Website
	475	bee	44	Unknown	Not a bumble bee	Quebec	Canada	2013-07-30	Not Determined	5841	Invalid	2017-09-27	34	rufocinctus	Website
	488	bee	67	occidentalis	Western bumble bee	Oregon	United States	2013-08-07	Female	6877	Verified	2013-12-13	27	occidentalis	Website
	490	bee	69	Unknown	Not a bumble bee	Wisconsin	United States	2013-08-28	Female	6877	Invalid	2017-08-11	27	impatiens	Website
	493	bee	75	Unknown	Not a bumble bee	Oregon	United States	2014-01-08	Female	1092	Invalid	2017-12-01	27	mixtus	Website
	495	bee	79	Unknown	Not a bumble bee	Oregon	United States	2014-01-08	Female	1092	Invalid	2017-12-01	27	flavidus	Website
	496	bee	80	Unknown	Not a bumble bee	Oregon	United States	2014-01-01	Female	1092	Invalid	2017-12-01	27	bifarius	Website
	497	bee	81	Unknown	Not a bumble bee	Oregon	United States	2014-01-01	Female	1092	Invalid	2017-12-01	27	bifarius	Website
	498	bee	82	Unknown	Not a bumble bee	Idaho	United States	2014-01-01	Female	1092	Invalid	2017-08-09	27	bifarius	Website
	508	bee	95	Unknown	Not a bumble bee	Quebec	Canada	2013-04-28	Male	8477	Invalid	2014-01-29	30	sp.	Website
	511	bee	98	Unknown	Not a bumble bee	Oregon	United States	2013-09-18	Not Determined	2648	Invalid	2017-11-23	25	sp.	Website
	530	bee	118	Unknown	Not a bumble bee	Washington	United States	2013-06-29	Male	1877	Invalid	2014-09-08	8	sp.	Website
	543	bee	133	Unknown	Not a bumble bee	New Jersey	United States	2013-08-11	Male	5469	Invalid	2014-01-29	30	impatiens	Website
	544	bee	134	Unknown	Not a bumble bee	California	United States	2013-11-16	Female	4015	Invalid	2017-12-01	27	melanopygus	Website
	550	bee	140	terricola	Yellow-banded bumble bee	Saskatchewan	Canada	2013-08-15	Male	1712	Verified	2014-01-24	4	terricola	Website
	556	bee	147	Unknown	Not a bumble bee	Oregon	United States	2012-05-05	Female	4884	Invalid	2014-08-22	30	impatiens	Website
	558	bee	149	Unknown	Not a bumble bee	California	United States	2014-01-22	Male	6976	Invalid	2014-01-22	27	sp.	Website
	559	bee	151	Unknown	Not a bumble bee	Massachusetts	United States	2010-07-21	Male	877	Invalid	2014-09-22	8	sp.	Website
	571	bee	163	Unknown	Not a bumble bee	California	United States	2007-06-15	Male	3431	Invalid	2014-01-22	27	sp.	Website
	590	bee	184	Unknown	Not a bumble bee	California	United States	2013-03-22	Male	4656	Invalid	2014-01-28	27	sp.	Website
	612	bee	211	Unknown	Not a bumble bee	Ontario	Canada	2013-09-18	Male	7396	Invalid	2014-09-22	8	sp.	Website
	618	bee	218	Unknown	Not a bumble bee	Massachusetts	United States	2010-09-26	Male	5818	Invalid	2014-09-22	8	sp.	Website
	622	bee	223	Unknown	Not a bumble bee	Texas	United States	2013-10-31	Female	3548	Invalid	2016-03-17	27	sp.	Website
	651	bee	252	Unknown	Not a bumble bee	Ontario	Canada	2013-09-17	Male	1972	Invalid	2014-01-29	30	fervidus	Website
	804	bee	429	Unknown	Not a bumble bee	California	United States	2012-05-09	Female	7548	Invalid	2016-04-19	27	sp.	Website
	814	bee	439	cryptarum	Cryptic bumble bee	Yukon	Canada	2011-07-09	Female	7924	Verified	2017-11-23	34	cryptarum	Website
	821	bee	446	Unknown	Not a bumble bee	Kansas	United States	2012-09-22	Female	824	Invalid	2016-04-29	27	sp.	Website
	823	bee	448	Unknown	Not a bumble bee	Kansas	United States	2013-09-21	Female	824	Invalid	2014-02-03	27	sp.	Website
	833	bee	458	Unknown	Not a bumble bee	Maine	United States	2013-07-09	Male	5100	Invalid	2014-02-03	27	sp.	Website
	838	bee	464	bimaculatus	Two-spotted bumble bee	Pennsylvania	United States	2012-04-25	Female	4786	Verified	2014-02-03	27	bimaculatus	Website
	845	bee	471	Unknown	Not a bumble bee	Maine	United States	2010-07-05	Female	1484	Invalid	2014-02-03	27	sp.	Website
	871	bee	499	sp.	Bumble bee	Oklahoma	United States	2013-08-14	Female	7163	Verified	2017-12-01	27	sp.	Website
	872	bee	500	sp.	Bumble bee	Oklahoma	United States	2012-07-22	Female	7163	Verified	2017-12-01	27	sp.	Website
	873	bee	501	auricomus	Black and gold bumble bee	Iowa	United States	2013-07-17	Female	6009	Verified	2017-12-01	27	pensylvanicus	Website
	874	bee	503	bifarius	Two-form bumble bee	Oregon	United States	2013-07-14	Female	1267	Verified	2017-12-01	27	sitkensis	Website
	875	bee	504	sp.	Bumble bee	Oregon	United States	2013-06-16	Female	1267	Verified	2016-10-24	27	sylvicola	Website
	888	bee	517	pensylvanicus	American bumble bee	Oklahoma	United States	2012-07-22	Male	7163	Verified	2016-10-24	27	pensylvanicus	Website
	889	bee	518	pensylvanicus	American bumble bee	Oklahoma	United States	2012-07-22	Male	7163	Verified	2016-10-24	27	sp.	Website
	923	bee	554	impatiens	Common eastern bumble bee	Texas	United States	2011-06-22	Not Determined	3823	Verified	2016-10-24	27	impatiens	Website
	924	bee	555	griseocollis	Brown-belted bumble bee	Texas	United States	2011-06-12	Not Determined	3823	Verified	2016-10-24	27	griseocollis	Website
	927	bee	559	impatiens	Common eastern bumble bee	Massachusetts	United States	2013-11-16	Male	7682	Verified	2014-02-13	27	sp.	Website
	933	bee	565	rufocinctus	Red-belted bumble bee	Alberta	Canada	2013-05-05	Female	2856	Verified	2016-10-24	27	rufocinctus	Website
	934	bee	566	rufocinctus	Red-belted bumble bee	Alberta	Canada	2013-06-08	Female	2856	Verified	2016-10-24	27	rufocinctus	Website
	938	bee	571	Unknown	Not a bumble bee	Alberta	Canada	2013-05-03	Female	2856	Invalid	2016-10-24	27	sp.	Website
	942	bee	575	fervidus	Yellow bumble bee	Iowa	United States	2014-02-12	Not Determined	6009	Verified	2016-10-24	27	fervidus	Website
	943	bee	576	impatiens	Common eastern bumble bee	New York	United States	2013-08-20	Female	3436	Verified	2016-10-24	27	impatiens	Website
	944	bee	577	bimaculatus	Two-spotted bumble bee	New York	United States	2013-06-16	Female	3436	Verified	2014-02-13	27	vagans	Website
	945	bee	578	impatiens	Common eastern bumble bee	New York	United States	2013-05-15	Female	3436	Verified	2014-02-13	27	affinis	Website
	947	bee	580	impatiens	Common eastern bumble bee	New York	United States	2006-09-07	Male	3436	Verified	2014-02-13	27	sandersoni	Website
	949	bee	582	sitkensis	Sitka bumble bee	Oregon	United States	2013-07-08	Female	5886	Verified	2016-10-24	27	rufocinctus	Website
	956	bee	589	Unknown	Not a bumble bee	Oregon	United States	2013-06-22	Male	5886	Invalid	2014-02-20	27	sp.	Website
	958	bee	592	Unknown	Not a bumble bee	Maryland	United States	2013-09-12	Female	5617	Invalid	2014-02-20	27	sp.	Website
	974	bee	611	borealis	Northern amber bumble bee	Quebec	Canada	2000-06-17	Female	298	Verified	2015-07-14	23	borealis	Website
	975	bee	612	Unknown	Not a bumble bee	New York	United States	2013-08-16	Male	494	Invalid	2014-02-21	27	sp.	Website
	978	bee	615	sp.	Bumble bee	Wisconsin	United States	2013-08-31	Female	5490	Verified	2016-10-24	27	impatiens	Website
	985	bee	623	rufocinctus	Red-belted bumble bee	Washington	United States	2013-05-25	Female	2269	Verified	2016-10-24	27	rufocinctus	Website
	986	bee	627	centralis	Central bumble bee	Wyoming	United States	2013-08-06	Male	6158	Verified	2014-03-27	27	flavifrons	Website
	987	bee	628	bifarius	Two-form bumble bee	Washington	United States	2009-07-21	Female	2269	Verified	2016-10-24	27	sp.	Website
	990	bee	631	nevadensis	Nevada bumble bee	Washington	United States	2009-07-21	Male	2269	Verified	2016-10-24	27	nevadensis	Website
	991	bee	632	appositus	White-shouldered bumble bee	Washington	United States	2011-08-18	Female	2269	Verified	2016-10-24	27	fervidus	Website
	992	bee	633	Unknown	Not a bumble bee	Wyoming	United States	2013-08-06	Female	6158	Invalid	2017-12-01	27	sp.	Website
	995	bee	636	rufocinctus	Red-belted bumble bee	Washington	United States	2011-06-10	Female	2269	Verified	2016-10-24	27	rufocinctus	Website
	996	bee	637	nevadensis	Nevada bumble bee	Washington	United States	2011-06-10	Female	2269	Verified	2016-10-24	27	rufocinctus	Website
	997	bee	638	vagans	Half-black bumble bee	Washington	United States	2012-09-14	Female	2269	Verified	2016-10-24	27	kirbiellus	Website
	998	bee	639	fervidus	Yellow bumble bee	Washington	United States	2013-06-14	Male	2269	Verified	2016-10-24	27	sp.	Website
	1003	bee	644	melanopygus	Black-tailed bumble bee	California	United States	2014-02-23	Female	4016	Verified	2016-10-24	27	melanopygus	Website
	1005	bee	646	sp.	Bumble bee	Oregon	United States	2013-08-10	Female	7889	Verified	2016-10-24	27	caliginosus	Website
	1006	bee	648	melanopygus	Black-tailed bumble bee	Oregon	United States	2013-07-01	Female	7889	Verified	2016-10-24	27	flavifrons	Website
	1007	bee	649	sp.	Bumble bee	Quebec	Canada	2013-07-06	Female	298	Verified	2016-10-24	27	sandersoni	Website
	1008	bee	651	vosnesenskii	Yellow-faced bumble bee	California	United States	2007-07-06	Male	1846	Verified	2016-10-24	27	sp.	Website
	1009	bee	652	bimaculatus	Two-spotted bumble bee	Quebec	Canada	2012-04-19	Female	298	Verified	2016-10-24	27	impatiens	Website
	1010	bee	653	bifarius	Two-form bumble bee	Wyoming	United States	2012-09-22	Female	6158	Verified	2014-03-27	27	rufocinctus	Website
	1014	bee	657	Unknown	Not a bumble bee	Oregon	United States	2014-03-01	Female	5886	Invalid	2016-10-24	27	sp.	Website
	1024	bee	669	griseocollis	Brown-belted bumble bee	Wisconsin	United States	2013-06-28	Female	5851	Verified	2016-10-24	27	griseocollis	Website
	1026	bee	672	insularis	Indiscriminant cuckoo bumble bee	Montana	United States	2012-05-14	Female	5851	Verified	2017-02-25	27	suckleyi	Website
	1028	bee	674	rufocinctus	Red-belted bumble bee	Wisconsin	United States	2013-07-01	Not Determined	5851	Verified	2017-12-01	27	rufocinctus	Website
	1029	bee	675	Unknown	Not a bumble bee	California	United States	2014-03-05	Male	2993	Invalid	2014-03-07	30	sp.	Website
	1030	bee	676	Unknown	Not a bumble bee	California	United States	2014-03-05	Male	2993	Invalid	2014-03-07	30	sp.	Website
	1035	bee	683	vosnesenskii	Yellow-faced bumble bee	California	United States	2014-03-06	Female	7134	Verified	2017-12-01	27	sp.	Website
	1036	bee	684	sp.	Bumble bee	California	United States	2014-03-06	Female	7134	Verified	2017-12-01	27	sp.	Website
	1039	bee	687	Unknown	Not a bumble bee	Idaho	United States	2013-08-02	Female	6001	Invalid	2017-08-09	27	occidentalis	Website
	1041	bee	690	bimaculatus	Two-spotted bumble bee	Wisconsin	United States	2013-07-25	Female	8048	Verified	2017-06-21	25	bimaculatus	Website
	1042	bee	691	impatiens	Common eastern bumble bee	Wisconsin	United States	2013-08-11	Female	8048	Verified	2017-08-17	25	bimaculatus	Website
	1049	bee	700	bimaculatus	Two-spotted bumble bee	Wisconsin	United States	2013-05-30	Female	8048	Verified	2017-12-01	27	bimaculatus	Website
	1050	bee	701	Unknown	Not a bumble bee	California	United States	2014-03-09	Female	7746	Invalid	2017-12-01	27	sp.	Website
	1051	bee	702	Unknown	Not a bumble bee	Arizona	United States	2014-03-09	Male	1240	Invalid	2014-03-14	30	sp.	Website
	1055	bee	706	melanopygus	Black-tailed bumble bee	California	United States	2014-03-05	Female	7814	Verified	2017-12-01	27	melanopygus	Website
	1056	bee	707	vosnesenskii	Yellow-faced bumble bee	California	United States	2014-02-10	Female	4656	Verified	2017-12-01	27	sp.	Website
	1057	bee	708	Unknown	Not a bumble bee	Nebraska	United States	2007-09-15	Female	6481	Invalid	2017-12-01	27	sp.	Website
	1058	bee	709	Unknown	Not a bumble bee	Nebraska	United States	2007-09-15	Female	6481	Invalid	2017-12-01	27	auricomus	Website
	1059	bee	710	Unknown	Not a bumble bee	Georgia	United States	2014-03-11	Female	5228	Invalid	2017-12-01	27	sp.	Website
	1060	bee	712	Unknown	Not a bumble bee	Georgia	United States	2014-03-11	Not Determined	5228	Invalid	2017-12-01	27	sp.	Website
	1062	bee	714	Unknown	Not a bumble bee	Georgia	United States	2014-03-11	Female	5228	Invalid	2017-12-01	27	sp.	Website
	1063	bee	715	Unknown	Not a bumble bee	California	United States	2014-03-11	Male	2993	Invalid	2014-09-08	8	sp.	Website
	1064	bee	716	Unknown	Not a bumble bee	California	United States	2014-03-11	Male	2993	Invalid	2014-09-08	8	sp.	Website
	1065	bee	718	flavifrons	Yellow head bumble bee	Washington	United States	2014-03-11	Female	5861	Verified	2017-09-13	25	flavifrons	Website
	1066	bee	719	sp.	Bumble bee	Washington	United States	2014-03-12	Female	1151	Verified	2017-09-13	25	sp.	Website
	1070	bee	724	pensylvanicus	American bumble bee	Texas	United States	2013-10-07	Not Determined	4615	Verified	2017-12-01	27	pensylvanicus	Website
	1072	bee	726	Unknown	Not a bumble bee	Texas	United States	2013-10-07	Male	4615	Invalid	2014-03-14	30	sp.	Website
	1073	bee	727	vosnesenskii	Yellow-faced bumble bee	Oregon	United States	2014-03-12	Female	5121	Verified	2017-11-21	25	vosnesenskii	Website
	1074	bee	728	vosnesenskii	Yellow-faced bumble bee	Oregon	United States	2014-03-12	Female	5121	Verified	2017-11-21	25	vosnesenskii	Website
	1077	bee	731	flavifrons	Yellow head bumble bee	Oregon	United States	2014-03-13	Female	4008	Verified	2017-11-16	25	flavifrons	Website
	1078	bee	732	flavifrons	Yellow head bumble bee	Oregon	United States	2014-03-13	Female	4008	Verified	2017-11-16	25	flavifrons	Website
	1082	bee	736	Unknown	Not a bumble bee	Minnesota	United States	2013-09-12	Male	6781	Invalid	2014-03-14	30	sp.	Website
	1091	bee	745	Unknown	Not a bumble bee	California	United States	2014-03-15	Male	2993	Invalid	2014-03-18	27	sp.	Website
	1092	bee	746	vosnesenskii	Yellow-faced bumble bee	California	United States	2014-03-15	Male	2993	Verified	2014-09-29	8	occidentalis	Website
	1093	bee	748	Unknown	Not a bumble bee	California	United States	2014-03-16	Male	2993	Invalid	2014-03-18	27	sp.	Website
	1099	bee	754	pensylvanicus	American bumble bee	California	United States	2004-08-25	Male	8254	Verified	2014-03-19	27	sp.	Website
	1101	bee	756	melanopygus	Black-tailed bumble bee	Oregon	United States	2014-03-18	Female	3580	Verified	2014-03-27	27	huntii	Website
	1102	bee	757	Unknown	Not a bumble bee	California	United States	2014-03-20	Male	7806	Invalid	2014-03-27	27	sp.	Website
	1103	bee	758	Unknown	Not a bumble bee	California	United States	2014-03-20	Male	7806	Invalid	2014-03-27	27	sp.	Website
	1104	bee	759	griseocollis	Brown-belted bumble bee	South Carolina	United States	2013-07-21	Male	8050	Verified	2017-12-01	27	bimaculatus	Website
	1105	bee	760	impatiens	Common eastern bumble bee	South Carolina	United States	2013-10-12	Female	8050	Verified	2017-12-01	27	griseocollis	Website
	1106	bee	761	Unknown	Not a bumble bee	Ohio	United States	2013-07-06	Female	908	Invalid	2017-12-01	27	sp.	Website
	1107	bee	762	Unknown	Not a bumble bee	Vermont	United States	2013-08-09	Female	908	Invalid	2017-12-01	27	rufocinctus	Website
	1108	bee	763	Unknown	Not a bumble bee	Ohio	United States	2013-07-04	Female	908	Invalid	2017-12-01	27	vagans	Website
	1109	bee	765	Unknown	Not a bumble bee	Washington	United States	2014-03-20	Female	5861	Invalid	2014-03-27	27	sp.	Website
	1110	bee	766	sp.	Bumble bee	Washington	United States	2014-03-18	Female	8047	Verified	2014-03-27	27	rufocinctus	Website
	1111	bee	767	Unknown	Not a bumble bee	Georgia	United States	2014-03-20	Male	6212	Invalid	2014-03-27	27	sp.	Website
	1117	bee	773	sitkensis	Sitka bumble bee	California	United States	2014-03-22	Female	535	Verified	2014-03-27	27	sp.	Website
	1122	bee	778	Unknown	Not a bumble bee	California	United States	2014-03-22	Female	6997	Invalid	2014-03-27	27	vosnesenskii	Website
	1125	bee	781	Unknown	Not a bumble bee	California	United States	2014-03-15	Male	5616	Invalid	2014-03-27	27	sp.	Website
	1129	bee	785	Unknown	Not a bumble bee	California	United States	2014-03-22	Male	4957	Invalid	2014-03-27	27	sp.	Website
	1131	bee	787	Unknown	Not a bumble bee	South Carolina	United States	2010-10-23	Male	8050	Invalid	2014-03-27	27	griseocollis	Website
	1132	bee	788	Unknown	Not a bumble bee	Georgia	United States	2014-03-23	Male	7403	Invalid	2014-03-27	27	sp.	Website
	1135	bee	791	Unknown	Not a bumble bee	Florida	United States	2014-03-08	Female	2257	Invalid	2017-12-01	27	sp.	Website
	1136	bee	792	Unknown	Not a bumble bee	Nevada	United States	2014-03-16	Female	2268	Invalid	2014-04-21	21	sp.	Website
	1137	bee	793	Unknown	Not a bumble bee	California	United States	2014-03-24	Male	7342	Invalid	2014-03-27	27	sp.	Website
	1138	bee	794	Unknown	Not a bumble bee	California	United States	2014-03-24	Female	7342	Invalid	2014-03-27	27	vosnesenskii	Website
	1142	bee	798	Unknown	Not a bumble bee	British Columbia	Canada	2014-03-13	Male	1385	Invalid	2014-03-27	27	melanopygus	Website
	1143	bee	800	Unknown	Not a bumble bee	California	United States	2014-03-01	Male	3970	Invalid	2014-03-27	27	sp.	Website
	1144	bee	801	impatiens	Common eastern bumble bee	South Carolina	United States	2014-03-23	Male	2384	Verified	2014-03-27	27	variabilis	Website
	1149	bee	806	vagans, sandersoni or perplexus	Two-yellow striped group	Michigan	United States	2013-06-14	Female	7750	Verified	2017-12-01	27	vagans	Website
	1151	bee	809	Unknown	Not a bumble bee	California	United States	2013-06-14	Male	6851	Invalid	2014-03-31	27	sp.	Website
	1152	bee	810	Unknown	Not a bumble bee	Georgia	United States	2014-03-21	Male	8149	Invalid	2014-03-31	27	sp.	Website
	1155	bee	813	Unknown	Not a bumble bee	South Carolina	United States	2014-03-30	Male	2384	Invalid	2014-03-31	27	sp.	Website
	1157	bee	817	melanopygus	Black-tailed bumble bee	Washington	United States	2013-08-08	Female	2102	Verified	2014-04-02	27	rufocinctus	Website
	1158	bee	818	flavifrons	Yellow head bumble bee	Washington	United States	2013-07-08	Male	2102	Verified	2014-04-02	27	occidentalis	Website
	1159	bee	819	flavifrons	Yellow head bumble bee	Washington	United States	2013-07-10	Male	2102	Verified	2014-04-02	27	occidentalis	Website
	1165	bee	829	Unknown	Not a bumble bee	British Columbia	Canada	2014-04-01	Male	4972	Invalid	2014-04-02	27	sp.	Website
	1168	bee	832	impatiens	Common eastern bumble bee	New York	United States	2013-09-10	Male	4861	Verified	2014-04-02	27	affinis	Website
	1169	bee	834	sp.	Bumble bee	California	United States	2014-04-02	Male	2067	Verified	2014-09-29	8	occidentalis	Website
	1170	bee	835	vosnesenskii or caliginosus	Yellow-faced group	Oregon	United States	2014-04-02	Female	6903	Verified	2017-11-15	25	fervidus	Website
	1171	bee	836	sp.	Bumble bee	California	United States	2014-04-02	Male	6184	Verified	2014-04-04	27	occidentalis	Website
	1172	bee	837	impatiens	Common eastern bumble bee	Pennsylvania	United States	2013-08-21	Female	7569	Verified	2017-12-01	27	sp.	Website
	1173	bee	838	fervidus	Yellow bumble bee	Maine	United States	2012-07-17	Female	244	Verified	2017-12-01	27	pensylvanicus	Website
	1175	bee	841	vagans, sandersoni or perplexus	Two-yellow striped group	Maine	United States	2012-09-01	Female	244	Verified	2017-12-01	27	vagans	Website
	1177	bee	843	vagans, sandersoni or perplexus	Two-yellow striped group	Maine	United States	2013-07-31	Female	244	Verified	2017-12-01	27	vagans	Website
	1178	bee	844	frigidus	Bombus frigidus	Maine	United States	2012-10-08	Male	244	Verified	2017-12-04	27	frigidus	Website
	1180	bee	846	sp.	Bumble bee	Maine	United States	2013-07-17	Female	244	Verified	2017-12-01	27	sp.	Website
	1181	bee	847	sp.	Bumble bee	Maine	United States	2013-07-31	Female	244	Verified	2017-12-01	27	rufocinctus	Website
	1182	bee	848	perplexus	Confusing bumble bee	Maine	United States	2013-07-31	Female	244	Verified	2017-12-01	27	perplexus	Website
	1183	bee	849	sp.	Bumble bee	Maine	United States	2013-08-01	Female	244	Verified	2017-12-01	27	rufocinctus	Website
	1186	bee	852	Unknown	Not a bumble bee	Texas	United States	2014-04-02	Male	3876	Invalid	2014-04-04	27	sp.	Website
	1187	bee	853	vosnesenskii	Yellow-faced bumble bee	Washington	United States	2014-04-04	Not Determined	2033	Verified	2017-09-13	25	insularis	Website
	1188	bee	854	melanopygus	Black-tailed bumble bee	Washington	United States	2014-03-14	Female	2333	Verified	2017-09-25	25	kirbiellus	Website
	1189	bee	855	melanopygus	Black-tailed bumble bee	Washington	United States	2014-03-14	Female	2333	Verified	2017-09-25	25	rufocinctus	Website
	1190	bee	856	pensylvanicus	American bumble bee	Florida	United States	2014-04-05	Female	7996	Verified	2017-12-01	27	pensylvanicus	Website
	1191	bee	857	vosnesenskii	Yellow-faced bumble bee	California	United States	2014-04-05	Female	1588	Verified	2017-12-01	27	sp.	Website
	1192	bee	858	Unknown	Not a bumble bee	Utah	United States	2013-06-03	Male	7965	Invalid	2014-04-14	30	sp.	Website
	1195	bee	861	Unknown	Not a bumble bee	North Carolina	United States	2014-04-05	Male	6909	Invalid	2014-05-27	30	affinis	Website
	1196	bee	862	vosnesenskii	Yellow-faced bumble bee	California	United States	2014-03-22	Female	798	Verified	2017-12-01	27	sp.	Website
	1199	bee	865	vosnesenskii	Yellow-faced bumble bee	California	United States	2014-04-06	Female	4656	Verified	2017-12-01	27	caliginosus	Website
	1201	bee	868	bimaculatus	Two-spotted bumble bee	Virginia	United States	2012-06-12	Male	239	Verified	2017-12-01	27	bimaculatus	Website
	1202	bee	869	bimaculatus	Two-spotted bumble bee	Virginia	United States	2012-06-12	Male	239	Verified	2017-12-01	27	bimaculatus	Website
	1208	bee	875	vosnesenskii or caliginosus	Yellow-faced group	Washington	United States	2014-04-07	Not Determined	4898	Verified	2017-09-13	25	flavidus	Website
	1209	bee	876	melanopygus	Black-tailed bumble bee	California	United States	2014-04-07	Male	4656	Verified	2014-09-29	8	occidentalis	Website
	1210	bee	877	sp.	Bumble bee	California	United States	2014-04-07	Female	535	Verified	2017-12-01	27	sp.	Website
	1215	bee	882	melanopygus	Black-tailed bumble bee	California	United States	2014-04-06	Female	6910	Verified	2017-12-01	27	melanopygus	Website
	1216	bee	883	vosnesenskii	Yellow-faced bumble bee	California	United States	2014-04-08	Female	535	Verified	2017-12-01	27	sp.	Website
	1217	bee	884	Unknown	Not a bumble bee	California	United States	2014-04-08	Male	4721	Invalid	2017-12-01	27	sp.	Website
	1218	bee	885	vosnesenskii	Yellow-faced bumble bee	British Columbia	Canada	2014-04-08	Female	8262	Verified	2017-12-01	27	vosnesenskii	Website
	1220	bee	887	Unknown	Not a bumble bee	Oregon	United States	2014-04-09	Not Determined	6016	Invalid	2017-11-29	25	fervidus	Website
	1221	bee	888	vosnesenskii	Yellow-faced bumble bee	Oregon	United States	2014-04-09	Female	6016	Verified	2017-11-15	25	fervidus	Website
	1223	bee	890	Unknown	Not a bumble bee	California	United States	2014-04-09	Male	4721	Invalid	2014-04-14	30	sp.	Website
	1225	bee	892	flavifrons	Yellow head bumble bee	Oregon	United States	2014-04-09	Female	4008	Verified	2017-11-16	25	flavifrons	Website
	1226	bee	893	Unknown	Not a bumble bee	California	United States	2014-04-09	Male	3751	Invalid	2014-04-14	30	sp.	Website
	1227	bee	894	vosnesenskii	Yellow-faced bumble bee	British Columbia	Canada	2014-04-09	Male	956	Verified	2014-09-29	8	occidentalis	Website
	1228	bee	895	Unknown	Not a bumble bee	Idaho	United States	2014-04-09	Female	3853	Invalid	2017-08-09	27	sp.	Website
	1229	bee	896	Unknown	Not a bumble bee	North Carolina	United States	2014-04-10	Male	532	Invalid	2014-09-08	8	sp.	Website
	1232	bee	899	bimaculatus	Two-spotted bumble bee	Maine	United States	2012-07-17	Male	244	Verified	2014-04-12	27	sp.	Website
	1233	bee	900	Unknown	Not a bumble bee	Kentucky	United States	2014-04-10	Male	447	Invalid	2014-04-12	27	pensylvanicus	Website
	1235	bee	902	impatiens	Common eastern bumble bee	Louisiana	United States	2014-04-11	Female	6981	Verified	2014-04-12	27	griseocollis	Website
	1237	bee	904	griseocollis	Brown-belted bumble bee	Maine	United States	2013-07-18	Male	244	Verified	2014-04-12	27	sp.	Website
	1240	bee	907	sp.	Bumble bee	Kansas	United States	2014-04-11	Male	7709	Verified	2014-04-12	27	bimaculatus	Website
	1244	bee	911	Unknown	Not a bumble bee	Indiana	United States	2014-04-12	Male	6308	Invalid	2014-04-16	27	rufocinctus	Website
	1252	bee	920	Unknown	Not a bumble bee	Florida	United States	2014-04-13	Male	5221	Invalid	2014-04-14	30	sp.	Website
	1254	bee	922	Unknown	Not a bumble bee	South Carolina	United States	2014-04-13	Female	8198	Invalid	2014-04-14	30	impatiens	Website
	1256	bee	924	Unknown	Not a bumble bee	Louisiana	United States	2014-04-13	Male	6981	Invalid	2014-04-14	30	impatiens	Website
	1258	bee	926	Unknown	Not a bumble bee	Ohio	United States	2014-04-13	Male	1961	Invalid	2014-04-14	30	sp.	Website
	1262	bee	930	huntii	Hunt's bumble bee	British Columbia	Canada	2014-04-11	Female	875	Verified	2014-04-16	27	centralis	Website
	1263	bee	932	Unknown	Not a bumble bee	New Jersey	United States	2014-04-13	Male	4067	Invalid	2014-04-14	30	sp.	Website
	1264	bee	937	Unknown	Not a bumble bee	Washington	United States	2014-04-13	Male	2333	Invalid	2014-04-16	27	sp.	Website
	1267	bee	940	melanopygus	Black-tailed bumble bee	California	United States	2014-04-12	Female	1784	Verified	2014-04-16	27	occidentalis	Website
	1269	bee	943	Unknown	Not a bumble bee	New York	United States	2013-07-26	Male	3436	Invalid	2014-04-14	30	sp.	Website
	1270	bee	945	vosnesenskii	Yellow-faced bumble bee	Washington	United States	2014-04-13	Female	25	Verified	2014-04-16	27	fervidus	Website
	1271	bee	946	vosnesenskii	Yellow-faced bumble bee	Oregon	United States	2014-04-13	Female	5707	Verified	2014-04-16	27	caliginosus	Website
	1272	bee	947	Unknown	Not a bumble bee	Massachusetts	United States	2014-04-14	Male	7656	Invalid	2014-04-14	30	sp.	Website
	1274	bee	950	bimaculatus	Two-spotted bumble bee	Connecticut	United States	2014-04-12	Female	679	Verified	2017-12-01	27	impatiens	Website
	1276	bee	952	Unknown	Not a bumble bee	South Carolina	United States	2014-04-14	Male	2806	Invalid	2014-04-16	27	sp.	Website
	1277	bee	953	pensylvanicus	American bumble bee	Nevada	United States	2012-12-06	Female	3506	Verified	2014-04-16	27	sp.	Website
	1278	bee	955	sp.	Bumble bee	Idaho	United States	2014-04-14	Female	3241	Verified	2014-04-16	27	melanopygus	Website
	1279	bee	956	centralis	Central bumble bee	Idaho	United States	2014-04-14	Female	1758	Verified	2017-08-09	27	centralis	Website
	1281	bee	958	impatiens	Common eastern bumble bee	Virginia	United States	2014-04-14	Female	4600	Verified	2014-04-16	27	affinis	Website
	1283	bee	960	melanopygus	Black-tailed bumble bee	California	United States	2014-04-14	Female	6910	Verified	2014-04-16	27	sp.	Website
	1285	bee	962	bimaculatus	Two-spotted bumble bee	Missouri	United States	2014-04-16	Female	8443	Verified	2014-04-16	27	vagans	Website
	1286	bee	964	sp.	Bumble bee	California	United States	2014-04-07	Female	880	Verified	2014-04-16	27	melanopygus	Website
	1287	bee	965	Unknown	Not a bumble bee	California	United States	2014-04-09	Male	880	Invalid	2014-04-16	27	sp.	Website
	1288	bee	966	Unknown	Not a bumble bee	California	United States	2014-04-10	Male	880	Invalid	2014-04-16	27	sp.	Website
	1289	bee	967	Unknown	Not a bumble bee	Oregon	United States	2014-04-16	Male	5446	Invalid	2014-04-16	27	sp.	Website
	1290	bee	970	Unknown	Not a bumble bee	Oregon	United States	2014-04-16	Male	8438	Invalid	2014-04-16	27	sp.	Website
	1291	bee	972	impatiens	Common eastern bumble bee	New York	United States	2014-04-12	Female	3669	Verified	2017-03-31	25	impatiens	Website
	1292	bee	973	vosnesenskii	Yellow-faced bumble bee	Oregon	United States	2014-04-15	Female	1202	Verified	2017-11-21	25	vosnesenskii	Website
	1294	bee	975	huntii	Hunt's bumble bee	Idaho	United States	2014-04-16	Female	3241	Verified	2017-08-09	27	sp.	Website
	1297	bee	978	Unknown	Not a bumble bee	Indiana	United States	2014-04-04	Male	7614	Invalid	2014-09-08	8	sp.	Website
	1299	bee	980	vosnesenskii	Yellow-faced bumble bee	British Columbia	Canada	2014-04-06	Female	7249	Verified	2017-12-01	27	vosnesenskii	Website
	1300	bee	981	melanopygus	Black-tailed bumble bee	California	United States	2014-04-17	Male	5427	Verified	2014-09-29	8	occidentalis	Website
	1303	bee	985	bimaculatus	Two-spotted bumble bee	Wisconsin	United States	2010-08-30	Female	1027	Verified	2017-12-01	27	sp.	Website
	1305	bee	989	sp.	Bumble bee	California	United States	2014-04-18	Female	7134	Verified	2017-12-01	27	sp.	Website
	1306	bee	990	sp.	Bumble bee	Ohio	United States	2014-04-17	Female	8036	Verified	2017-12-01	27	variabilis	Website
	1307	bee	991	Unknown	Not a bumble bee	Connecticut	United States	2014-04-18	Male	7778	Invalid	2014-09-15	8	sp.	Website
	1308	bee	992	Unknown	Not a bumble bee	Alabama	United States	2014-04-17	Male	7279	Invalid	2014-04-23	30	sp.	Website
	1309	bee	993	Unknown	Not a bumble bee	Pennsylvania	United States	2014-04-18	Male	8112	Invalid	2014-04-23	30	sp.	Website
	1311	bee	995	Unknown	Not a bumble bee	California	United States	2014-04-16	Male	7260	Invalid	2014-09-08	8	sp.	Website
	1312	bee	996	Unknown	Not a bumble bee	Oregon	United States	2014-04-18	Male	1253	Invalid	2014-04-24	27	sp.	Website
	1320	bee	1006	vagans, sandersoni or perplexus	Two-yellow striped group	Pennsylvania	United States	2014-04-19	Female	5352	Verified	2017-12-01	27	vagans	Website
	1322	bee	1008	Unknown	Not a bumble bee	Pennsylvania	United States	2014-04-19	Male	5352	Invalid	2014-04-23	30	sp.	Website
	1325	bee	1011	melanopygus	Black-tailed bumble bee	British Columbia	Canada	2014-04-18	Female	2774	Verified	2014-04-24	27	sp.	Website
	1326	bee	1012	Unknown	Not a bumble bee	Maryland	United States	2014-04-19	Male	43	Invalid	2014-04-24	27	griseocollis	Website
	1327	bee	1013	impatiens	Common eastern bumble bee	Virginia	United States	2014-04-19	Female	7204	Verified	2014-04-24	27	bimaculatus	Website
	1328	bee	1014	Unknown	Not a bumble bee	Indiana	United States	2014-04-19	Male	4893	Invalid	2014-04-24	27	griseocollis	Website
	1329	bee	1016	Unknown	Not a bumble bee	California	United States	2014-04-19	Male	7025	Invalid	2014-04-24	27	sp.	Website
	1333	bee	1020	pensylvanicus	American bumble bee	Texas	United States	2013-08-27	Male	7891	Verified	2014-04-24	27	sp.	Website
	1334	bee	1021	perplexus	Confusing bumble bee	Pennsylvania	United States	2014-04-19	Female	4786	Verified	2017-12-01	27	vagans	Website
	1336	bee	1024	Unknown	Not a bumble bee	British Columbia	Canada	2014-04-06	Male	2483	Invalid	2014-04-24	27	sp.	Website
	1337	bee	1025	Unknown	Not a bumble bee	British Columbia	Canada	2014-04-13	Female	4839	Invalid	2017-12-01	27	sitkensis	Website
	1338	bee	1026	Unknown	Not a bumble bee	Virginia	United States	2014-04-20	Male	90	Invalid	2014-04-24	27	sp.	Website
	1341	bee	1029	griseocollis	Brown-belted bumble bee	Illinois	United States	2014-04-20	Female	8049	Verified	2017-12-01	27	griseocollis	Website
	1342	bee	1030	bimaculatus	Two-spotted bumble bee	Pennsylvania	United States	2014-04-20	Female	4181	Verified	2014-04-24	27	sp.	Website
	1348	bee	1036	Unknown	Not a bumble bee	Tennessee	United States	2014-04-20	Male	7545	Invalid	2014-04-24	27	sp.	Website
	1351	bee	1039	sp.	Bumble bee	Washington	United States	2014-04-20	Female	4685	Verified	2014-04-24	27	melanopygus	Website
	1355	bee	1043	Unknown	Not a bumble bee	Washington	United States	2014-04-02	Not Determined	5861	Invalid	2017-09-13	25	vosnesenskii	Website
	1356	bee	1044	Unknown	Not a bumble bee	Washington	United States	2014-04-20	Female	5861	Invalid	2014-04-24	27	vosnesenskii	Website
	1357	bee	1045	Unknown	Not a bumble bee	Washington	United States	2014-04-02	Not Determined	5861	Invalid	2017-09-13	25	vosnesenskii	Website
	1358	bee	1046	Unknown	Not a bumble bee	Washington	United States	2014-04-20	Female	5861	Invalid	2014-04-24	27	vosnesenskii	Website
	1361	bee	1049	Unknown	Not a bumble bee	Oregon	United States	2014-04-19	Male	4741	Invalid	2014-04-24	27	sp.	Website
	1363	bee	1052	Unknown	Not a bumble bee	Oregon	United States	2014-04-21	Female	7889	Invalid	2014-04-24	27	caliginosus	Website
	1364	bee	1054	Unknown	Not a bumble bee	Iowa	United States	2014-04-20	Male	2337	Invalid	2014-04-23	30	sp.	Website
	1366	bee	1057	flavifrons	Yellow head bumble bee	Washington	United States	2011-07-19	Female	8173	Verified	2014-04-24	27	sp.	Website
	1367	bee	1058	flavifrons	Yellow head bumble bee	Washington	United States	2011-07-19	Female	8173	Verified	2014-04-24	27	sp.	Website
	1368	bee	1059	Unknown	Not a bumble bee	Washington	United States	2011-07-19	Male	8173	Invalid	2014-04-24	27	sp.	Website
	1371	bee	1062	Unknown	Not a bumble bee	Texas	United States	2013-10-24	Male	7891	Invalid	2014-04-23	30	sp.	Website
	1372	bee	1063	Unknown	Not a bumble bee	Virginia	United States	2014-04-22	Male	7948	Invalid	2014-04-23	30	sp.	Website
	1380	bee	1072	melanopygus	Black-tailed bumble bee	Oregon	United States	2014-04-20	Female	6195	Verified	2014-04-24	27	sp.	Website
	1381	bee	1073	melanopygus	Black-tailed bumble bee	Oregon	United States	2014-04-22	Female	6729	Verified	2014-04-24	27	centralis	Website
	1383	bee	1075	Unknown	Not a bumble bee	Oregon	United States	2014-04-22	Not Determined	6016	Invalid	2017-11-16	25	melanopygus	Website
	1384	bee	1076	Unknown	Not a bumble bee	Louisiana	United States	2014-04-22	Male	6981	Invalid	2014-04-23	30	sp.	Website
	1386	bee	1078	Unknown	Not a bumble bee	Oregon	United States	2014-04-22	Not Determined	6016	Invalid	2017-11-23	25	sp.	Website
	1387	bee	1079	Unknown	Not a bumble bee	Michigan	United States	2014-04-19	Female	1165	Invalid	2014-04-23	30	impatiens	Website
	1388	bee	1080	Unknown	Not a bumble bee	Virginia	United States	2014-04-22	Male	2441	Invalid	2014-04-23	30	sp.	Website
	1392	bee	1084	Unknown	Not a bumble bee	Virginia	United States	2014-04-22	Male	4971	Invalid	2014-04-23	30	sp.	Website
	1395	bee	1087	Unknown	Not a bumble bee	Ontario	Canada	2013-08-26	Female	784	Invalid	2014-04-23	30	sp.	Website
	1396	bee	1088	Unknown	Not a bumble bee	North Carolina	United States	2014-04-23	Male	6994	Invalid	2014-04-23	30	sp.	Website
	1403	bee	1099	Unknown	Not a bumble bee	South Carolina	United States	2014-04-23	Male	6578	Invalid	2014-04-23	30	sp.	Website
	1406	bee	1102	fervidus	Yellow bumble bee	California	United States	2014-04-24	Female	5791	Verified	2017-12-01	27	pensylvanicus	Website
	1409	bee	1105	pensylvanicus	American bumble bee	Texas	United States	2014-04-23	Female	3823	Verified	2017-12-01	27	pensylvanicus	Website
	1411	bee	1107	Unknown	Not a bumble bee	Tennessee	United States	2014-04-24	Female	5220	Invalid	2014-04-25	30	sp.	Website
	1413	bee	1109	Unknown	Not a bumble bee	Georgia	United States	2014-04-24	Male	6987	Invalid	2014-04-25	30	sp.	Website
	1414	bee	1110	melanopygus	Black-tailed bumble bee	California	United States	2014-04-22	Female	3411	Verified	2017-12-01	27	melanopygus	Website
	1415	bee	1111	Unknown	Not a bumble bee	Nova Scotia	Canada	2011-10-05	Not Determined	7915	Invalid	2017-09-27	34	sp.	Website
	1416	bee	1112	Unknown	Not a bumble bee	Indiana	United States	2014-04-11	Female	7555	Invalid	2014-04-25	30	sp.	Website
	1417	bee	1113	Unknown	Not a bumble bee	Texas	United States	2014-04-19	Male	5878	Invalid	2014-09-15	8	sp.	Website
	1421	bee	1117	Unknown	Not a bumble bee	Virginia	United States	2014-04-18	Female	7893	Invalid	2017-12-01	27	griseocollis	Website
	1422	bee	1118	sp.	Bumble bee	Utah	United States	2014-04-25	Female	2647	Verified	2017-12-01	27	fervidus	Website
	1423	bee	1119	vosnesenskii	Yellow-faced bumble bee	British Columbia	Canada	2014-04-25	Female	6962	Verified	2017-12-01	27	insularis	Website
	1424	bee	1120	Unknown	Not a bumble bee	Florida	United States	2014-04-23	Female	7344	Invalid	2017-12-01	27	griseocollis	Website
	1425	bee	1121	sp.	Bumble bee	New Jersey	United States	2014-04-26	Female	4067	Verified	2017-12-01	27	sp.	Website
	1426	bee	1122	Unknown	Not a bumble bee	Tennessee	United States	2014-04-26	Female	5220	Invalid	2017-12-01	27	griseocollis	Website
	1427	bee	1123	Unknown	Not a bumble bee	Oregon	United States	2014-04-25	Male	1076	Invalid	2014-09-08	8	sp.	Website
	1428	bee	1124	Unknown	Not a bumble bee	Maryland	United States	2014-04-26	Male	384	Invalid	2014-09-22	8	sp.	Website
	1429	bee	1125	Unknown	Not a bumble bee	Oregon	United States	2014-04-26	Male	3346	Invalid	2014-09-08	8	sp.	Website
	1430	bee	1126	Unknown	Not a bumble bee	Virginia	United States	2014-04-19	Male	7893	Invalid	2014-09-22	8	sp.	Website
	1431	bee	1127	bifarius	Two-form bumble bee	Idaho	United States	2014-04-14	Male	1151	Verified	2017-08-09	27	rufocinctus	Website
	1432	bee	1128	mixtus	Fuzzy-horned bumble bee	Washington	United States	2013-09-02	Female	6145	Verified	2017-09-25	25	mixtus	Website
	1433	bee	1129	Unknown	Not a bumble bee	Oregon	United States	2014-04-25	Not Determined	4138	Invalid	2017-11-16	27	griseocollis	Website
	1434	bee	1131	Unknown	Not a bumble bee	Maryland	United States	2014-04-26	Male	2968	Invalid	2014-09-22	8	sp.	Website
	1435	bee	1132	impatiens	Common eastern bumble bee	Maryland	United States	2014-04-26	Female	2968	Verified	2017-06-21	25	bimaculatus	Website
	1436	bee	1133	Unknown	Not a bumble bee	Illinois	United States	2014-04-26	Male	6252	Invalid	2014-05-27	30	affinis	Website
	1437	bee	1136	Unknown	Not a bumble bee	Texas	United States	2014-04-19	Male	6332	Invalid	2014-09-08	8	sp.	Website
	1439	bee	1138	impatiens	Common eastern bumble bee	Ohio	United States	2014-04-27	Female	5141	Verified	2017-03-31	25	impatiens	Website
	1441	bee	1141	impatiens	Common eastern bumble bee	Ohio	United States	2014-04-27	Female	4567	Verified	2017-12-01	27	sp.	Website
	1442	bee	1142	Unknown	Not a bumble bee	Virginia	United States	2014-04-27	Female	6835	Invalid	2017-07-06	27	terricola	Website
	1443	bee	1143	sp.	Bumble bee	New York	United States	2014-04-27	Female	3612	Verified	2017-12-01	27	impatiens	Website
	1445	bee	1145	bimaculatus	Two-spotted bumble bee	Wisconsin	United States	2014-04-21	Female	7814	Verified	2017-12-01	27	bimaculatus	Website
	1448	bee	1148	sp.	Bumble bee	Connecticut	United States	2014-04-27	Female	1615	Verified	2017-12-01	27	griseocollis	Website
	1449	bee	1149	Unknown	Not a bumble bee	Kentucky	United States	2014-04-26	Female	3376	Invalid	2017-12-01	27	griseocollis	Website
	1450	bee	1150	Unknown	Not a bumble bee	Virginia	United States	2014-04-27	Male	7867	Invalid	2014-09-15	8	sp.	Website
	1451	bee	1151	vosnesenskii	Yellow-faced bumble bee	Oregon	United States	2014-04-02	Not Determined	5124	Verified	2017-11-15	25	fervidus	Website
	1452	bee	1152	melanopygus	Black-tailed bumble bee	Oregon	United States	2014-04-27	Female	2897	Verified	2017-11-16	25	melanopygus	Website
	1453	bee	1153	Unknown	Not a bumble bee	Oregon	United States	2014-04-27	Male	2897	Invalid	2014-09-08	8	sp.	Website
	1455	bee	1156	Unknown	Not a bumble bee	Oregon	United States	2014-04-28	Female	2897	Invalid	2015-02-02	8	sp.	Website
	1456	bee	1157	Unknown	Not a bumble bee	Oregon	United States	2014-04-28	Male	2897	Invalid	2014-09-22	8	sp.	Website
	1457	bee	1158	impatiens	Common eastern bumble bee	Alabama	United States	2014-04-22	Female	2283	Verified	2017-03-31	25	impatiens	Website
	1458	bee	1159	impatiens	Common eastern bumble bee	Alabama	United States	2014-04-28	Female	2283	Verified	2017-03-31	25	impatiens	Website
	1459	bee	1160	impatiens	Common eastern bumble bee	Alabama	United States	2014-04-28	Female	2283	Verified	2017-03-31	25	impatiens	Website
	1460	bee	1161	nevadensis	Nevada bumble bee	Oregon	United States	2014-04-20	Female	3992	Verified	2017-11-15	25	fervidus	Website
	1461	bee	1162	bimaculatus	Two-spotted bumble bee	Illinois	United States	2014-04-25	Female	685	Verified	2017-06-21	25	bimaculatus	Website
	1463	bee	1165	Unknown	Not a bumble bee	Oregon	United States	2014-04-28	Female	4126	Invalid	2017-12-01	27	franklini	Website
	1464	bee	1166	Unknown	Not a bumble bee	Washington	United States	2014-04-28	Not Determined	5861	Invalid	2017-09-13	25	sp.	Website
	1465	bee	1167	flavifrons	Yellow head bumble bee	Washington	United States	2014-04-28	Female	5861	Verified	2017-09-25	25	sp.	Website
	1467	bee	1170	Unknown	Not a bumble bee	Wisconsin	United States	2014-04-22	Male	6080	Invalid	2014-09-08	8	sp.	Website
	1468	bee	1171	flavifrons	Yellow head bumble bee	Washington	United States	2014-04-28	Female	5861	Verified	2017-09-25	25	sp.	Website
	1469	bee	1172	vagans	Half-black bumble bee	Alberta	Canada	2013-07-31	Female	1825	Verified	2017-12-01	27	vagans	Website
	1470	bee	1173	sp.	Bumble bee	Alberta	Canada	2013-07-31	Female	1825	Verified	2017-12-01	27	rufocinctus	Website
	1472	bee	1175	vosnesenskii or caliginosus	Yellow-faced group	Oregon	United States	2014-04-28	Female	6213	Verified	2017-11-17	25	caliginosus	Website
	1473	bee	1176	sitkensis	Sitka bumble bee	California	United States	2014-04-28	Female	535	Verified	2017-12-01	27	sp.	Website
	1474	bee	1177	sitkensis	Sitka bumble bee	California	United States	2014-04-28	Female	535	Verified	2017-12-01	27	sitkensis	Website
	1475	bee	1178	caliginosus	Obscure bumble bee	California	United States	2014-04-28	Female	535	Verified	2017-12-01	27	caliginosus	Website
	1476	bee	1179	caliginosus	Obscure bumble bee	California	United States	2014-04-28	Female	535	Verified	2017-12-01	27	caliginosus	Website
	1477	bee	1180	caliginosus	Obscure bumble bee	California	United States	2014-04-28	Female	535	Verified	2017-12-01	27	caliginosus	Website
	1478	bee	1181	impatiens	Common eastern bumble bee	New Jersey	United States	2014-04-28	Female	4673	Verified	2017-12-01	27	sp.	Website
	1480	bee	1184	vosnesenskii	Yellow-faced bumble bee	Oregon	United States	2014-04-29	Female	731	Verified	2017-12-01	27	insularis	Website
	1481	bee	1185	vosnesenskii or caliginosus	Yellow-faced group	Oregon	United States	2014-04-29	Female	4398	Verified	2017-11-17	25	caliginosus	Website
	1482	bee	1186	impatiens	Common eastern bumble bee	Illinois	United States	2014-04-29	Female	1434	Verified	2017-12-01	27	sp.	Website
	1483	bee	1187	mixtus	Fuzzy-horned bumble bee	Washington	United States	2014-04-29	Female	5861	Verified	2017-09-25	25	sp.	Website
	1484	bee	1188	vosnesenskii or caliginosus	Yellow-faced group	Oregon	United States	2014-04-29	Female	3007	Verified	2017-11-17	25	caliginosus	Website
	1485	bee	1189	flavifrons	Yellow head bumble bee	Washington	United States	2014-04-29	Female	5861	Verified	2017-09-25	25	sp.	Website
	1489	bee	1193	sp.	Bumble bee	British Columbia	Canada	2014-04-29	Female	2735	Verified	2017-12-01	27	sp.	Website
	1490	bee	1194	Unknown	Not a bumble bee	Texas	United States	2014-04-29	Male	7943	Invalid	2014-09-08	8	sp.	Website
	1491	bee	1195	flavifrons	Yellow head bumble bee	Washington	United States	2014-04-29	Female	5861	Verified	2017-09-25	25	sp.	Website
	1492	bee	1196	Unknown	Not a bumble bee	Washington	United States	2014-04-29	Male	1930	Invalid	2014-09-08	8	sp.	Website
	1493	bee	1197	Unknown	Not a bumble bee	Alabama	United States	2014-04-13	Male	4486	Invalid	2014-05-27	30	affinis	Website
	1496	bee	1200	vosnesenskii or caliginosus	Yellow-faced group	Oregon	United States	2014-04-29	Female	4012	Verified	2017-11-17	25	caliginosus	Website
	1497	bee	1201	Unknown	Not a bumble bee	Oregon	United States	2014-04-30	Not Determined	6939	Invalid	2017-11-23	25	sp.	Website
	1499	bee	1203	vosnesenskii	Yellow-faced bumble bee	British Columbia	Canada	2014-04-30	Female	3402	Verified	2017-12-01	27	vosnesenskii	Website
	1504	bee	1208	sp.	Bumble bee	Oregon	United States	2014-04-30	Female	7932	Verified	2017-11-15	25	fervidus	Website
	1506	bee	1210	melanopygus	Black-tailed bumble bee	Oregon	United States	2014-05-01	Female	6709	Verified	2017-11-14	25	mixtus	Website
	1507	bee	1211	Unknown	Not a bumble bee	Oregon	United States	2014-04-30	Female	8455	Invalid	2014-05-15	27	sp.	Website
	1508	bee	1212	vosnesenskii or caliginosus	Yellow-faced group	Oregon	United States	2014-04-30	Female	234	Verified	2017-11-17	25	caliginosus	Website
	1509	bee	1213	caliginosus	Obscure bumble bee	Oregon	United States	2014-05-01	Female	3051	Verified	2017-11-17	25	caliginosus	Website
	1510	bee	1214	ternarius	Tri-colored bumble bee	Ontario	Canada	2013-08-04	Female	5621	Verified	2017-06-12	34	ternarius	Website
	1513	bee	1217	melanopygus	Black-tailed bumble bee	British Columbia	Canada	2011-03-31	Female	4357	Verified	2017-12-01	27	flavifrons	Website
	1514	bee	1218	vosnesenskii	Yellow-faced bumble bee	British Columbia	Canada	2012-06-02	Female	4357	Verified	2017-12-01	27	vosnesenskii	Website
	1516	bee	1221	Unknown	Not a bumble bee	California	United States	2014-05-02	Female	4836	Invalid	2017-12-01	27	sp.	Website
	1518	bee	1223	melanopygus	Black-tailed bumble bee	Washington	United States	2014-05-02	Female	5861	Verified	2017-09-25	25	sp.	Website
	1519	bee	1224	vosnesenskii or caliginosus	Yellow-faced group	Oregon	United States	2013-07-31	Female	2448	Verified	2017-11-17	25	caliginosus	Website
	1522	bee	1228	Unknown	Not a bumble bee	Florida	United States	2014-03-08	Male	6435	Invalid	2014-09-22	8	sp.	Website
	1523	bee	1229	Unknown	Not a bumble bee	Indiana	United States	2014-04-30	Male	473	Invalid	2014-09-08	8	sp.	Website
	1526	bee	1232	Unknown	Not a bumble bee	Wisconsin	United States	2014-05-03	Male	1993	Invalid	2014-09-08	8	sp.	Website
	1527	bee	1233	Unknown	Not a bumble bee	Wisconsin	United States	2014-05-03	Male	1993	Invalid	2014-09-02	27	sp.	Website
	1528	bee	1234	Unknown	Not a bumble bee	Virginia	United States	2014-05-03	Female	6835	Invalid	2017-12-01	27	impatiens	Website
	1530	bee	1236	Unknown	Not a bumble bee	California	United States	2014-05-03	Female	4412	Invalid	2017-12-01	27	sp.	Website
	1531	bee	1237	Unknown	Not a bumble bee	Arkansas	United States	2014-05-03	Female	2633	Invalid	2017-12-01	27	fervidus	Website
	1532	bee	1238	Unknown	Not a bumble bee	Maryland	United States	2014-05-03	Female	5617	Invalid	2017-12-01	27	griseocollis	Website
	1534	bee	1240	vagans	Half-black bumble bee	Idaho	United States	2014-05-03	Female	7376	Verified	2017-08-09	27	vagans	Website
	1535	bee	1241	impatiens	Common eastern bumble bee	Massachusetts	United States	2014-05-03	Female	1813	Verified	2017-03-31	25	impatiens	Website
	1536	bee	1242	flavifrons	Yellow head bumble bee	Oregon	United States	2014-04-24	Female	4008	Verified	2017-11-16	25	flavifrons	Website
	1538	bee	1244	mixtus	Fuzzy-horned bumble bee	Oregon	United States	2014-04-25	Female	4008	Verified	2017-11-14	25	mixtus	Website
	1540	bee	1247	flavifrons	Yellow head bumble bee	Oregon	United States	2014-04-28	Female	4008	Verified	2017-11-16	25	flavifrons	Website
	1541	bee	1248	flavifrons	Yellow head bumble bee	Oregon	United States	2014-04-28	Female	4008	Verified	2017-11-16	25	flavifrons	Website
	1543	bee	1250	Unknown	Not a bumble bee	Missouri	United States	2014-05-03	Female	1933	Invalid	2017-12-01	27	impatiens	Website
	1545	bee	1252	melanopygus	Black-tailed bumble bee	Oregon	United States	2014-05-03	Female	2259	Verified	2017-11-16	25	flavifrons	Website
	1546	bee	1253	Unknown	Not a bumble bee	Ohio	United States	2014-05-02	Not Determined	4891	Invalid	2017-06-21	25	bimaculatus	Website
	1547	bee	1254	Unknown	Not a bumble bee	California	United States	2014-05-03	Male	3848	Invalid	2014-09-08	8	sp.	Website
	1548	bee	1255	sp.	Bumble bee	Pennsylvania	United States	2010-08-26	Female	6529	Verified	2017-12-01	27	pensylvanicus	Website
	1549	bee	1256	Unknown	Not a bumble bee	Alabama	United States	2014-04-14	Male	6238	Invalid	2014-09-22	8	sp.	Website
	1551	bee	1258	Unknown	Not a bumble bee	Alabama	United States	2014-04-19	Female	6238	Invalid	2016-06-04	16	impatiens	Website
	1552	bee	1259	impatiens	Common eastern bumble bee	Alabama	United States	2014-04-25	Female	6238	Verified	2017-12-01	27	auricomus	Website
	1553	bee	1260	Unknown	Not a bumble bee	Alabama	United States	2014-04-20	Male	6238	Invalid	2016-06-04	16	impatiens	Website
	1556	bee	1263	impatiens	Common eastern bumble bee	Alabama	United States	2014-04-11	Female	6238	Verified	2017-12-01	27	bimaculatus	Website
	1557	bee	1264	sp.	Bumble bee	Alabama	United States	2014-04-30	Female	6238	Verified	2017-12-01	27	bimaculatus	Website
	1558	bee	1265	Unknown	Not a bumble bee	Alabama	United States	2014-04-27	Female	6238	Invalid	2017-12-01	27	auricomus	Website
	1559	bee	1266	bimaculatus	Two-spotted bumble bee	Alabama	United States	2014-04-28	Female	430	Verified	2019-02-22	23	auricomus	Website
	1560	bee	1267	Unknown	Not a bumble bee	Alabama	United States	2014-04-30	Male	430	Invalid	2014-09-23	27	sp.	Website
	1561	bee	1268	Unknown	Not a bumble bee	Alabama	United States	2014-04-30	Male	430	Invalid	2014-09-23	27	sp.	Website
	1562	bee	1269	Unknown	Not a bumble bee	Indiana	United States	2014-05-04	Female	5481	Invalid	2016-02-21	14	sp.	Website
	1563	bee	1270	Unknown	Not a bumble bee	Alabama	United States	2014-04-27	Male	6238	Invalid	2014-05-04	30	auricomus	Website
	1564	bee	1271	Unknown	Not a bumble bee	Alabama	United States	2014-04-26	Male	6238	Invalid	2014-05-04	30	auricomus	Website
	1565	bee	1272	Unknown	Not a bumble bee	Alabama	United States	2014-04-25	Not Determined	6238	Invalid	2017-03-31	25	impatiens	Website
	1566	bee	1273	Unknown	Not a bumble bee	Alabama	United States	2014-04-23	Female	6238	Invalid	2014-05-04	30	auricomus	Website
	1567	bee	1274	Unknown	Not a bumble bee	Alabama	United States	2014-04-23	Not Determined	6238	Invalid	2017-03-31	25	impatiens	Website
	1568	bee	1275	impatiens	Common eastern bumble bee	Alabama	United States	2014-04-23	Female	6238	Verified	2017-12-01	27	bimaculatus	Website
	1570	bee	1277	Unknown	Not a bumble bee	Alabama	United States	2014-04-22	Male	6238	Invalid	2014-09-08	8	sp.	Website
	1571	bee	1278	Unknown	Not a bumble bee	Alabama	United States	2014-04-22	Male	6238	Invalid	2014-09-08	8	sp.	Website
	1572	bee	1279	Unknown	Not a bumble bee	Alabama	United States	2014-04-22	Female	6238	Invalid	2017-12-01	27	impatiens	Website
	1573	bee	1280	Unknown	Not a bumble bee	Alabama	United States	2014-04-22	Male	6238	Invalid	2014-09-08	8	sp.	Website
	1574	bee	1281	Unknown	Not a bumble bee	Alabama	United States	2014-04-17	Not Determined	6238	Invalid	2017-03-31	25	impatiens	Website
	1575	bee	1282	Unknown	Not a bumble bee	Mississippi	United States	2014-04-27	Female	1394	Invalid	2017-12-01	27	fraternus	Website
	1576	bee	1283	Unknown	Not a bumble bee	Alabama	United States	2014-04-26	Male	1394	Invalid	2014-05-04	30	impatiens	Website
	1577	bee	1284	Unknown	Not a bumble bee	Alabama	United States	2014-04-28	Female	1394	Invalid	2017-12-01	27	impatiens	Website
	1578	bee	1285	Unknown	Not a bumble bee	Alabama	United States	2014-04-27	Male	1394	Invalid	2014-05-04	30	bimaculatus	Website
	1579	bee	1286	Unknown	Not a bumble bee	Alabama	United States	2014-04-19	Male	1394	Invalid	2014-05-04	30	bimaculatus	Website
	1581	bee	1289	sp.	Bumble bee	Alabama	United States	2014-04-19	Female	1394	Verified	2017-12-01	27	bimaculatus	Website
	1584	bee	1292	vosnesenskii	Yellow-faced bumble bee	British Columbia	Canada	2014-05-04	Female	6962	Verified	2017-12-01	27	insularis	Website
	1591	bee	1299	bimaculatus	Two-spotted bumble bee	Alabama	United States	2014-05-03	Female	7620	Verified	2019-02-22	23	impatiens	Website
	1593	bee	1301	impatiens	Common eastern bumble bee	Alabama	United States	2014-05-03	Female	7620	Verified	2017-12-04	27	impatiens	Website
	1595	bee	1303	Unknown	Not a bumble bee	Illinois	United States	2014-04-21	Female	5880	Invalid	2017-12-04	27	auricomus	Website
	1596	bee	1304	Unknown	Not a bumble bee	Kentucky	United States	2014-05-04	Female	6308	Invalid	2017-12-04	27	griseocollis	Website
	1599	bee	1307	Unknown	Not a bumble bee	Alabama	United States	2014-04-27	Male	7620	Invalid	2014-09-08	8	sp.	Website
	1600	bee	1308	impatiens	Common eastern bumble bee	Alabama	United States	2014-03-11	Female	977	Verified	2017-12-04	27	bimaculatus	Website
	1601	bee	1309	Unknown	Not a bumble bee	Alabama	United States	2014-04-18	Female	977	Invalid	2017-12-04	27	impatiens	Website
	1602	bee	1310	Unknown	Not a bumble bee	Alabama	United States	2014-04-24	Not Determined	977	Invalid	2017-12-04	27	impatiens	Website
	1603	bee	1311	Unknown	Not a bumble bee	Alabama	United States	2014-04-24	Female	977	Invalid	2017-12-04	27	bimaculatus	Website
	1604	bee	1312	Unknown	Not a bumble bee	Arkansas	United States	2014-04-27	Not Determined	4527	Invalid	2017-06-23	25	bimaculatus	Website
	1605	bee	1313	Unknown	Not a bumble bee	Montana	United States	2014-05-04	Female	8266	Invalid	2017-12-04	27	huntii	Website
	1606	bee	1314	griseocollis	Brown-belted bumble bee	Oklahoma	United States	2014-05-03	Female	5863	Verified	2017-12-04	27	griseocollis	Website
	1607	bee	1315	Unknown	Not a bumble bee	Virginia	United States	2014-05-04	Female	6835	Invalid	2014-05-05	30	sandersoni	Website
	1608	bee	1316	vosnesenskii	Yellow-faced bumble bee	Oregon	United States	2014-05-02	Female	2354	Verified	2017-11-21	25	vosnesenskii	Website
	1610	bee	1318	sp.	Bumble bee	California	United States	2014-05-03	Female	6927	Verified	2017-12-04	27	sp.	Website
	1611	bee	1319	bifarius	Two-form bumble bee	Montana	United States	2014-04-29	Female	6699	Verified	2017-12-04	27	sp.	Website
	1613	bee	1321	Unknown	Not a bumble bee	Oregon	United States	2014-04-25	Male	7350	Invalid	2014-05-05	30	sp.	Website
	1614	bee	1322	impatiens	Common eastern bumble bee	Ontario	Canada	2014-05-05	Queen	1323	Verified	2017-10-06	34	impatiens	Website
	1617	bee	1325	Unknown	Not a bumble bee	Alabama	United States	2013-05-01	Male	2575	Invalid	2014-05-07	27	sp.	Website
	1618	bee	1326	Unknown	Not a bumble bee	Alabama	United States	2013-05-02	Male	2575	Invalid	2014-05-07	27	sp.	Website
	1621	bee	1329	Unknown	Not a bumble bee	Alabama	United States	2014-04-18	Female	2575	Invalid	2014-05-27	30	affinis	Website
	1622	bee	1330	Unknown	Not a bumble bee	Alabama	United States	2014-04-18	Male	2575	Invalid	2014-05-07	27	sp.	Website
	1623	bee	1331	Unknown	Not a bumble bee	Alabama	United States	2014-04-19	Female	2575	Invalid	2017-12-04	27	impatiens	Website
	1624	bee	1332	Unknown	Not a bumble bee	Alabama	United States	2014-04-19	Male	2575	Invalid	2014-05-07	27	sp.	Website
	1627	bee	1336	Unknown	Not a bumble bee	Alabama	United States	2014-04-20	Male	2575	Invalid	2014-05-07	27	sp.	Website
	1629	bee	1338	Unknown	Not a bumble bee	Alabama	United States	2014-05-04	Male	2575	Invalid	2014-05-07	27	sp.	Website
	1634	bee	1344	bimaculatus	Two-spotted bumble bee	New York	United States	2014-05-05	Female	494	Verified	2014-05-07	27	griseocollis	Website
	1642	bee	1355	Unknown	Not a bumble bee	Mississippi	United States	2014-04-26	Female	6191	Invalid	2017-12-04	27	fervidus	Website
changed status from 'verified' to 'invalid', July 20/19	1643	bee	1356	Unknown	Not a bumble bee	Mississippi	United States	2014-04-26	Female	6191	Invalid	2014-05-07	27	griseocollis	Website
	1648	bee	1361	Unknown	Not a bumble bee	Mississippi	United States	2014-04-26	Male	6191	Invalid	2014-05-07	27	sp.	Website
	1651	bee	1364	Unknown	Not a bumble bee	Alabama	United States	2014-04-19	Male	8020	Invalid	2014-05-07	27	sp.	Website
	1652	bee	1365	Unknown	Not a bumble bee	Alabama	United States	2014-04-19	Male	8020	Invalid	2014-05-07	27	sp.	Website
	1653	bee	1366	Unknown	Not a bumble bee	Alabama	United States	2014-04-26	Male	8020	Invalid	2014-05-07	27	sp.	Website
	1655	bee	1368	Unknown	Not a bumble bee	Alabama	United States	2014-05-01	Not Determined	8020	Invalid	2017-03-31	25	impatiens	Website
	1656	bee	1369	Unknown	Not a bumble bee	Alabama	United States	2014-05-01	Not Determined	8020	Invalid	2017-03-31	25	impatiens	Website
	1658	bee	1371	vosnesenskii	Yellow-faced bumble bee	Oregon	United States	2014-04-27	Female	1788	Verified	2014-05-07	27	insularis	Website
	1660	bee	1373	mixtus	Fuzzy-horned bumble bee	Washington	United States	2014-05-05	Female	5861	Verified	2014-05-07	27	sp.	Website
	1661	bee	1374	sp.	Bumble bee	Iowa	United States	2014-05-06	Male	6901	Verified	2014-05-07	27	pensylvanicus	Website
	1662	bee	1376	Unknown	Not a bumble bee	Washington	United States	2014-05-06	Not Determined	4038	Invalid	2017-09-14	25	huntii	Website
	1671	bee	1385	Unknown	Not a bumble bee	South Carolina	United States	2014-05-07	Male	4793	Invalid	2014-05-07	27	sp.	Website
	1674	bee	1388	Unknown	Not a bumble bee	Oregon	United States	2014-05-07	Male	7721	Invalid	2014-10-06	8	sp.	Website
	1675	bee	1389	impatiens	Common eastern bumble bee	Massachusetts	United States	2014-05-07	Female	678	Verified	2017-12-04	27	rufocinctus	Website
	1676	bee	1390	Unknown	Not a bumble bee	Oregon	United States	2014-05-01	Not Determined	4853	Invalid	2017-08-08	27	griseocollis	Website
	1677	bee	1391	mixtus	Fuzzy-horned bumble bee	British Columbia	Canada	2014-05-07	Female	3240	Verified	2017-12-04	27	mixtus	Website
	1679	bee	1393	mixtus	Fuzzy-horned bumble bee	British Columbia	Canada	2014-05-07	Female	3240	Verified	2017-12-04	27	mixtus	Website
	1684	bee	1398	Unknown	Not a bumble bee	Oregon	United States	2014-05-01	Not Determined	4850	Invalid	2017-11-16	25	melanopygus	Website
	1685	bee	1401	flavifrons	Yellow head bumble bee	Washington	United States	2014-05-08	Female	5993	Verified	2017-09-25	25	sp.	Website
	1686	bee	1402	melanopygus	Black-tailed bumble bee	Washington	United States	2014-05-08	Female	5993	Verified	2017-09-25	25	sp.	Website
	1688	bee	1404	griseocollis	Brown-belted bumble bee	Idaho	United States	2014-05-08	Female	6778	Verified	2017-08-09	27	vagans	Website
	1689	bee	1405	Unknown	Not a bumble bee	Oregon	United States	2014-05-08	Male	4734	Invalid	2014-09-29	8	sp.	Website
	1690	bee	1406	sp.	Bumble bee	Oregon	United States	2014-05-01	Female	4850	Verified	2017-11-21	25	vosnesenskii	Website
	1691	bee	1407	pensylvanicus	American bumble bee	Oklahoma	United States	2014-05-07	Female	6000	Verified	2017-12-04	27	auricomus	Website
	1693	bee	1409	impatiens	Common eastern bumble bee	Oklahoma	United States	2014-05-07	Female	6000	Verified	2017-12-04	27	sp.	Website
	1694	bee	1410	Unknown	Not a bumble bee	South Carolina	United States	2014-05-07	Male	2806	Invalid	2014-09-15	8	sp.	Website
	1695	bee	1411	impatiens	Common eastern bumble bee	Nebraska	United States	2014-05-07	Female	7373	Verified	2017-03-31	25	impatiens	Website
	1696	bee	1413	rufocinctus	Red-belted bumble bee	Washington	United States	2014-05-08	Female	5192	Verified	2017-09-25	25	rufocinctus	Website
	1697	bee	1414	flavifrons	Yellow head bumble bee	Oregon	United States	2014-05-07	Female	4008	Verified	2017-11-16	25	flavifrons	Website
	1698	bee	1415	ternarius	Tri-colored bumble bee	Alberta	Canada	2014-05-08	Female	2856	Verified	2017-12-04	27	ternarius	Website
	1699	bee	1416	flavifrons	Yellow head bumble bee	Oregon	United States	2014-05-07	Female	4008	Verified	2017-11-16	25	flavifrons	Website
	1700	bee	1417	Unknown	Not a bumble bee	Ohio	United States	2014-05-08	Male	5998	Invalid	2014-09-08	8	sp.	Website
	1701	bee	1418	pensylvanicus	American bumble bee	Oklahoma	United States	2014-05-08	Female	5863	Verified	2017-12-04	27	sp.	Website
	1702	bee	1419	Unknown	Not a bumble bee	Oregon	United States	2014-04-26	Female	5648	Invalid	2015-02-02	8	sp.	Website
	1703	bee	1420	Unknown	Not a bumble bee	Oregon	United States	2014-05-07	Not Determined	5190	Invalid	2017-11-23	25	sp.	Website
	1704	bee	1421	sp.	Bumble bee	Oregon	United States	2014-05-07	Female	5190	Verified	2017-11-21	25	vosnesenskii	Website
	1707	bee	1424	impatiens	Common eastern bumble bee	Michigan	United States	2014-05-05	Female	5565	Verified	2017-12-04	27	sp.	Website
	1709	bee	1426	Unknown	Not a bumble bee	New Hampshire	United States	2014-05-09	Female	2131	Invalid	2017-12-04	27	impatiens	Website
	1711	bee	1428	bimaculatus	Two-spotted bumble bee	Tennessee	United States	2014-05-09	Female	5220	Verified	2014-07-10	23	affinis	Website
	1712	bee	1429	bimaculatus	Two-spotted bumble bee	Pennsylvania	United States	2014-05-09	Female	5352	Verified	2017-06-23	25	bimaculatus	Website
	1713	bee	1430	pensylvanicus	American bumble bee	Kansas	United States	2014-05-07	Female	1962	Verified	2017-12-04	27	pensylvanicus	Website
	1714	bee	1431	melanopygus	Black-tailed bumble bee	California	United States	2014-05-09	Female	535	Verified	2017-12-04	27	melanopygus	Website
	1715	bee	1432	caliginosus	Obscure bumble bee	California	United States	2014-05-09	Female	535	Verified	2017-12-04	27	caliginosus	Website
	1716	bee	1433	griseocollis	Brown-belted bumble bee	Pennsylvania	United States	2014-05-09	Female	7569	Verified	2017-12-04	27	variabilis	Website
	1717	bee	1434	impatiens	Common eastern bumble bee	Michigan	United States	2014-05-09	Female	1165	Verified	2017-03-31	25	impatiens	Website
	1718	bee	1435	Unknown	Not a bumble bee	Ontario	Canada	2014-05-10	Male	2771	Invalid	2014-09-08	8	sp.	Website
	1719	bee	1436	sp.	Bumble bee	Idaho	United States	2014-05-10	Female	3703	Verified	2017-08-09	27	fervidus	Website
	1721	bee	1438	impatiens	Common eastern bumble bee	Wisconsin	United States	2014-05-10	Female	7152	Verified	2017-12-04	27	fervidus	Website
	1723	bee	1440	impatiens	Common eastern bumble bee	New Hampshire	United States	2014-05-10	Female	4189	Verified	2017-03-31	25	impatiens	Website
	1724	bee	1441	melanopygus	Black-tailed bumble bee	Washington	United States	2014-05-10	Female	2212	Verified	2017-09-26	25	sp.	Website
	1725	bee	1442	melanopygus	Black-tailed bumble bee	California	United States	2014-04-20	Male	1732	Verified	2014-09-29	8	occidentalis	Website
	1726	bee	1443	Unknown	Not a bumble bee	California	United States	2014-05-10	Male	1557	Invalid	2014-09-22	8	sp.	Website
	1727	bee	1444	melanopygus	Black-tailed bumble bee	California	United States	2014-04-20	Male	1732	Verified	2014-09-29	8	occidentalis	Website
	1729	bee	1446	flavifrons	Yellow head bumble bee	British Columbia	Canada	2014-05-10	Female	3240	Verified	2017-12-04	27	flavifrons	Website
	1730	bee	1447	vosnesenskii	Yellow-faced bumble bee	British Columbia	Canada	2014-05-10	Female	3240	Verified	2017-12-04	27	vosnesenskii	Website
	1732	bee	1449	vosnesenskii	Yellow-faced bumble bee	Oregon	United States	2014-05-06	Female	7927	Verified	2017-11-21	25	vosnesenskii	Website
	1733	bee	1450	vagans, sandersoni or perplexus	Two-yellow striped group	Massachusetts	United States	2014-05-05	Female	5333	Verified	2017-12-04	27	sp.	Website
	1734	bee	1451	mixtus	Fuzzy-horned bumble bee	Washington	United States	2014-05-10	Female	1930	Verified	2017-09-26	25	mixtus	Website
	1735	bee	1452	mixtus	Fuzzy-horned bumble bee	Washington	United States	2014-05-10	Female	1930	Verified	2017-09-26	25	mixtus	Website
	1738	bee	1455	vosnesenskii or caliginosus	Yellow-faced group	Washington	United States	2014-05-10	Female	722	Verified	2017-09-26	25	insularis	Website
	1740	bee	1457	flavifrons	Yellow head bumble bee	Washington	United States	2014-05-10	Female	722	Verified	2017-09-26	25	sp.	Website
	1743	bee	1460	Unknown	Not a bumble bee	Manitoba	Canada	2013-05-23	Female	2958	Invalid	2017-12-04	27	sp.	Website
	1744	bee	1461	griseocollis	Brown-belted bumble bee	Oklahoma	United States	2014-05-09	Female	7163	Verified	2017-12-04	27	griseocollis	Website
	1745	bee	1462	fraternus	Southern plains bumble bee	Oklahoma	United States	2014-05-09	Female	7163	Verified	2017-12-04	27	fraternus	Website
	1746	bee	1463	impatiens	Common eastern bumble bee	Oklahoma	United States	2014-05-09	Female	7163	Verified	2017-03-31	25	impatiens	Website
	1747	bee	1464	sp.	Bumble bee	Oklahoma	United States	2014-05-09	Female	7163	Verified	2018-01-17	34	pensylvanicus	Website
	1748	bee	1465	impatiens	Common eastern bumble bee	Oklahoma	United States	2014-05-09	Female	7163	Verified	2017-03-31	25	impatiens	Website
	1749	bee	1467	impatiens	Common eastern bumble bee	Oklahoma	United States	2014-05-09	Female	7163	Verified	2017-03-31	25	impatiens	Website
	1750	bee	1468	pensylvanicus	American bumble bee	Oklahoma	United States	2014-05-09	Female	7163	Verified	2017-12-04	27	pensylvanicus	Website
	1751	bee	1469	pensylvanicus	American bumble bee	Oklahoma	United States	2014-05-09	Female	7163	Verified	2017-12-04	27	pensylvanicus	Website
	1752	bee	1471	griseocollis	Brown-belted bumble bee	Ontario	Canada	2014-05-11	Female	7626	Verified	2017-06-12	34	griseocollis	Website
	1755	bee	1474	vosnesenskii	Yellow-faced bumble bee	Washington	United States	2014-05-11	Female	3987	Verified	2017-09-26	25	sp.	Website
	1757	bee	1476	Unknown	Not a bumble bee	New Jersey	United States	2014-05-11	Male	3272	Invalid	2014-09-08	8	sp.	Website
	1758	bee	1477	Unknown	Not a bumble bee	Ontario	Canada	2014-05-11	Female	4845	Invalid	2016-10-25	27	affinis	Website
	1759	bee	1478	Unknown	Not a bumble bee	Ontario	Canada	2014-05-11	Female	4845	Invalid	2016-10-25	27	affinis	Website
	1760	bee	1479	griseocollis	Brown-belted bumble bee	New York	United States	2014-05-11	Female	4664	Verified	2017-12-04	27	impatiens	Website
	1761	bee	1480	huntii	Hunt's bumble bee	Colorado	United States	2014-05-11	Female	661	Verified	2017-12-04	27	sylvicola	Website
	1762	bee	1481	Unknown	Not a bumble bee	Minnesota	United States	2014-05-11	Female	7657	Invalid	2016-04-29	7	sp.	Website
	1763	bee	1482	Unknown	Not a bumble bee	Massachusetts	United States	2014-05-11	Female	306	Invalid	2017-12-04	27	griseocollis	Website
	1764	bee	1483	Unknown	Not a bumble bee	Michigan	United States	2014-05-11	Male	5480	Invalid	2014-09-08	8	sp.	Website
	1765	bee	1484	impatiens	Common eastern bumble bee	Nova Scotia	Canada	2014-05-11	Female	1261	Verified	2017-03-31	25	impatiens	Website
	1766	bee	1485	impatiens	Common eastern bumble bee	Nova Scotia	Canada	2014-05-11	Female	1261	Verified	2017-03-31	25	impatiens	Website
	1767	bee	1486	impatiens	Common eastern bumble bee	Arkansas	United States	2014-05-11	Female	1405	Verified	2017-12-04	27	sp.	Website
	1768	bee	1487	impatiens	Common eastern bumble bee	Nova Scotia	Canada	2014-05-04	Female	1261	Verified	2017-03-31	25	impatiens	Website
	1769	bee	1488	Unknown	Not a bumble bee	Massachusetts	United States	2014-05-11	Male	306	Invalid	2014-09-22	8	sp.	Website
	1771	bee	1490	sp.	Bumble bee	Idaho	United States	2014-05-11	Not Determined	3241	Verified	2017-08-09	27	kirbiellus	Website
	1773	bee	1492	impatiens	Common eastern bumble bee	Ontario	Canada	2014-05-11	Female	1887	Verified	2017-02-18	28	impatiens	Website
	1781	bee	1500	mixtus	Fuzzy-horned bumble bee	Washington	United States	2014-05-06	Female	5861	Verified	2017-09-26	25	sp.	Website
	1782	bee	1501	flavifrons	Yellow head bumble bee	Washington	United States	2014-05-06	Female	5861	Verified	2017-09-26	25	sp.	Website
	1783	bee	1503	mixtus	Fuzzy-horned bumble bee	Washington	United States	2014-05-07	Female	5861	Verified	2017-09-26	25	sp.	Website
	1784	bee	1504	sp.	Bumble bee	Washington	United States	2014-05-07	Female	5861	Verified	2017-09-26	25	sp.	Website
	1786	bee	1506	sp.	Bumble bee	Washington	United States	2014-05-11	Female	5861	Verified	2017-09-26	25	sp.	Website
	1787	bee	1507	Unknown	Not a bumble bee	Virginia	United States	2014-05-12	Male	6674	Invalid	2014-05-13	27	sp.	Website
	1802	bee	1522	Unknown	Not a bumble bee	New Jersey	United States	2014-05-12	Male	4067	Invalid	2014-05-13	27	sp.	Website
	1803	bee	1523	bimaculatus	Two-spotted bumble bee	Ontario	Canada	2014-05-12	Female	3218	Verified	2017-06-12	34	bimaculatus	Website
	1804	bee	1524	bimaculatus	Two-spotted bumble bee	Ontario	Canada	2014-05-12	Female	4212	Verified	2017-06-12	34	bimaculatus	Website
	1806	bee	1526	sp.	Bumble bee	Vermont	United States	2014-05-12	Not Determined	7207	Verified	2017-12-04	27	vagans	Website
	1809	bee	1529	mixtus	Fuzzy-horned bumble bee	Idaho	United States	2014-05-12	Female	7376	Verified	2017-08-09	27	rufocinctus	Website
	1810	bee	1530	Unknown	Not a bumble bee	Oregon	United States	2014-05-10	Male	5190	Invalid	2014-05-14	27	vosnesenskii	Website
	1811	bee	1531	bimaculatus	Two-spotted bumble bee	Indiana	United States	2014-05-12	Female	4385	Verified	2017-12-04	27	sp.	Website
	1813	bee	1533	impatiens	Common eastern bumble bee	Nebraska	United States	2014-05-11	Female	5244	Verified	2017-12-04	27	sp.	Website
	1814	bee	1534	Unknown	Not a bumble bee	Alabama	United States	2014-05-13	Male	6752	Invalid	2014-05-14	27	sp.	Website
	1815	bee	1535	Unknown	Not a bumble bee	Alberta	Canada	2014-05-12	Female	2856	Invalid	2017-12-04	27	perplexus	Website
	1817	bee	1537	flavifrons	Yellow head bumble bee	Washington	United States	2014-05-13	Female	4355	Verified	2017-09-26	25	flavifrons	Website
	1821	bee	1541	Unknown	Not a bumble bee	Arizona	United States	2014-04-21	Male	374	Invalid	2014-05-14	27	sp.	Website
	1825	bee	1545	sp.	Bumble bee	Oregon	United States	2014-05-13	Female	1016	Verified	2017-11-15	25	fervidus	Website
	1826	bee	1546	sp.	Bumble bee	Maryland	United States	2014-05-10	Female	439	Verified	2017-12-04	27	bimaculatus	Website
	1827	bee	1547	sp.	Bumble bee	Maryland	United States	2014-05-10	Female	439	Verified	2017-12-04	27	bimaculatus	Website
	1830	bee	1550	vosnesenskii	Yellow-faced bumble bee	Oregon	United States	2014-05-13	Female	5784	Verified	2017-11-21	25	insularis	Website
	1835	bee	1555	impatiens	Common eastern bumble bee	Ontario	Canada	2014-05-14	Female	7848	Verified	2017-12-04	27	sp.	Website
	1839	bee	1559	Unknown	Not a bumble bee	California	United States	2014-05-14	Male	8474	Invalid	2014-09-08	8	sp.	Website
	1841	bee	1561	ternarius	Tri-colored bumble bee	Alberta	Canada	2014-05-14	Female	2136	Verified	2017-12-04	27	ternarius	Website
	1842	bee	1562	Unknown	Not a bumble bee	Alberta	Canada	2014-05-14	Female	2136	Invalid	2017-12-04	27	sp.	Website
	1843	bee	1563	melanopygus	Black-tailed bumble bee	Washington	United States	2014-05-12	Female	5861	Verified	2017-09-26	25	rufocinctus	Website
	1844	bee	1564	Unknown	Not a bumble bee	Washington	United States	2014-05-13	Male	5861	Invalid	2014-09-08	8	sp.	Website
	1847	bee	1567	Unknown	Not a bumble bee	California	United States	2014-04-20	Male	6679	Invalid	2014-05-18	27	sp.	Website
	1849	bee	1569	vagans	Half-black bumble bee	Idaho	United States	2014-05-13	Female	7376	Verified	2017-08-09	27	vagans	Website
	1856	bee	1576	Unknown	Not a bumble bee	New Jersey	United States	2014-05-11	Male	3911	Invalid	2014-05-18	27	impatiens	Website
	1869	bee	1589	Unknown	Not a bumble bee	British Columbia	Canada	2011-08-29	Female	4357	Invalid	2017-12-04	27	ternarius	Website
	1878	bee	1598	sp.	Bumble bee	British Columbia	Canada	2014-03-24	Female	4357	Verified	2014-05-18	27	flavifrons	Website
	1880	bee	1600	sp.	Bumble bee	British Columbia	Canada	2014-03-24	Female	4357	Verified	2014-05-18	27	melanopygus	Website
	1881	bee	1601	melanopygus	Black-tailed bumble bee	Oregon	United States	2014-05-16	Female	7167	Verified	2014-05-18	27	bifarius	Website
	1893	bee	1613	pensylvanicus	American bumble bee	Texas	United States	2012-08-09	Female	3477	Verified	2014-05-18	27	auricomus	Website
	1894	bee	1614	Unknown	Not a bumble bee	New Jersey	United States	2014-05-17	Male	4067	Invalid	2014-05-18	27	sp.	Website
	1897	bee	1619	melanopygus	Black-tailed bumble bee	Oregon	United States	2014-05-10	Female	4059	Verified	2014-05-18	27	bifarius	Website
	1898	bee	1620	fervidus	Yellow bumble bee	Oregon	United States	2014-05-10	Female	3992	Verified	2017-11-15	25	fervidus	Website
	1899	bee	1621	bimaculatus	Two-spotted bumble bee	Maine	United States	2014-05-10	Female	1060	Verified	2017-12-04	27	griseocollis	Website
	1901	bee	1623	Unknown	Not a bumble bee	Texas	United States	2014-05-17	Male	5079	Invalid	2014-05-18	27	sp.	Website
	1902	bee	1624	Unknown	Not a bumble bee	New Brunswick	Canada	2014-05-17	Male	7315	Invalid	2014-05-18	27	sp.	Website
	1905	bee	1627	Unknown	Not a bumble bee	Texas	United States	2014-05-17	Male	5079	Invalid	2014-05-18	27	sp.	Website
	1906	bee	1628	Unknown	Not a bumble bee	Texas	United States	2014-05-17	Male	5079	Invalid	2014-05-18	27	sp.	Website
	1907	bee	1630	sp.	Bumble bee	British Columbia	Canada	2011-08-29	Female	4357	Verified	2014-05-18	27	ternarius	Website
	1909	bee	1632	melanopygus	Black-tailed bumble bee	Washington	United States	2014-05-17	Female	6260	Verified	2014-05-18	27	sp.	Website
	1916	bee	1640	melanopygus	Black-tailed bumble bee	Washington	United States	2014-05-17	Female	6656	Verified	2014-05-18	27	huntii	Website
	1917	bee	1641	impatiens	Common eastern bumble bee	Massachusetts	United States	2013-10-01	Female	4905	Verified	2014-05-18	27	sp.	Website
	1924	bee	1649	flavifrons	Yellow head bumble bee	British Columbia	Canada	2013-06-01	Male	4357	Verified	2017-12-04	27	flavifrons	Website
	1925	bee	1650	flavifrons	Yellow head bumble bee	British Columbia	Canada	2014-04-09	Female	4357	Verified	2017-12-04	27	flavifrons	Website
	1927	bee	1653	impatiens	Common eastern bumble bee	Wisconsin	United States	2014-05-18	Female	5541	Verified	2017-12-04	27	sp.	Website
	1930	bee	1657	pensylvanicus	American bumble bee	Texas	United States	2014-04-27	Female	3823	Verified	2017-12-04	27	pensylvanicus	Website
	1931	bee	1658	pensylvanicus	American bumble bee	Texas	United States	2014-04-27	Female	3823	Verified	2017-12-04	27	pensylvanicus	Website
	1932	bee	1660	pensylvanicus	American bumble bee	Texas	United States	2014-04-27	Female	3823	Verified	2017-12-04	27	pensylvanicus	Website
	1933	bee	1665	pensylvanicus	American bumble bee	Texas	United States	2014-04-27	Female	3823	Verified	2017-12-04	27	pensylvanicus	Website
	1934	bee	1666	auricomus	Black and gold bumble bee	Texas	United States	2014-05-02	Female	3823	Verified	2017-12-04	27	auricomus	Website
	1938	bee	1671	impatiens	Common eastern bumble bee	Ontario	Canada	2014-05-18	Female	4196	Verified	2017-03-31	25	impatiens	Website
	1941	bee	1674	impatiens	Common eastern bumble bee	Nova Scotia	Canada	2014-05-15	Female	1956	Verified	2017-03-31	25	impatiens	Website
	1942	bee	1675	vosnesenskii	Yellow-faced bumble bee	Oregon	United States	2014-05-14	Female	4869	Verified	2017-12-04	27	insularis	Website
	1944	bee	1679	centralis	Central bumble bee	Idaho	United States	2014-05-18	Female	1758	Verified	2017-08-09	27	centralis	Website
	1945	bee	1680	huntii	Hunt's bumble bee	Colorado	United States	2014-05-17	Female	4659	Verified	2017-12-04	27	sp.	Website
	1946	bee	1681	melanopygus	Black-tailed bumble bee	Washington	United States	2014-05-19	Female	113	Verified	2017-09-26	25	mixtus	Website
	1947	bee	1682	Unknown	Not a bumble bee	Ontario	Canada	2014-05-19	Male	66	Invalid	2014-05-27	30	affinis	Website
	1950	bee	1685	Unknown	Not a bumble bee	Oregon	United States	2014-05-19	Male	6942	Invalid	2014-09-08	8	sp.	Website
	1951	bee	1686	fervidus	Yellow bumble bee	Virginia	United States	2014-05-18	Female	239	Verified	2017-12-04	27	pensylvanicus	Website
	1952	bee	1687	sp.	Bumble bee	Oregon	United States	2014-05-19	Female	6283	Verified	2017-11-17	25	vosnesenskii or caliginosus	Website
	1953	bee	1688	mixtus	Fuzzy-horned bumble bee	Washington	United States	2014-05-17	Female	7186	Verified	2017-09-26	25	mixtus	Website
	1954	bee	1689	vosnesenskii or caliginosus	Yellow-faced group	Washington	United States	2014-05-14	Female	7186	Verified	2017-09-26	25	caliginosus	Website
	1955	bee	1690	melanopygus	Black-tailed bumble bee	Washington	United States	2014-05-10	Female	7186	Verified	2017-09-26	25	melanopygus	Website
	1958	bee	1693	vosnesenskii or caliginosus	Yellow-faced group	Oregon	United States	2014-05-11	Female	7191	Verified	2017-11-21	25	vosnesenskii	Website
	1960	bee	1695	sitkensis	Sitka bumble bee	British Columbia	Canada	2014-05-10	Female	4357	Verified	2017-12-04	27	sp.	Website
	1962	bee	1697	Unknown	Not a bumble bee	California	United States	2014-05-20	Female	7417	Invalid	2017-12-04	27	rufocinctus	Website
	1963	bee	1698	Unknown	Not a bumble bee	New Jersey	United States	2014-05-15	Not Determined	4573	Invalid	2017-03-31	25	impatiens	Website
	1965	bee	1700	auricomus	Black and gold bumble bee	Virginia	United States	2012-06-09	Female	239	Verified	2017-12-04	27	auricomus	Website
	1966	bee	1701	Unknown	Not a bumble bee	Ontario	Canada	2014-05-20	Female	5336	Invalid	2017-06-12	34	sp.	Website
	1967	bee	1702	impatiens	Common eastern bumble bee	Minnesota	United States	2014-05-20	Female	4107	Verified	2017-03-12	7	vagans	Website
	1968	bee	1703	sp.	Bumble bee	Ontario	Canada	2014-05-13	Worker	5396	Verified	2017-10-06	34	impatiens	Website
	1969	bee	1704	Unknown	Not a bumble bee	New York	United States	2014-05-19	Female	7196	Invalid	2017-12-04	27	sp.	Website
	1971	bee	1706	Unknown	Not a bumble bee	Maine	United States	2014-05-20	Female	5029	Invalid	2017-12-04	27	sp.	Website
	1972	bee	1707	impatiens	Common eastern bumble bee	Maine	United States	2014-05-20	Female	5029	Verified	2014-05-22	27	sp.	Website
	1974	bee	1709	griseocollis	Brown-belted bumble bee	Wisconsin	United States	2014-05-20	Female	6369	Verified	2014-05-22	27	impatiens	Website
	1976	bee	1711	sp.	Bumble bee	Colorado	United States	2014-05-20	Female	3882	Verified	2014-05-22	27	impatiens	Website
	1978	bee	1713	bimaculatus	Two-spotted bumble bee	Virginia	United States	2014-05-18	Female	4971	Verified	2017-12-04	27	griseocollis	Website
	1979	bee	1714	pensylvanicus	American bumble bee	Wisconsin	United States	2014-05-20	Female	1993	Verified	2017-12-04	27	pensylvanicus	Website
	1981	bee	1716	Unknown	Not a bumble bee	Wyoming	United States	2014-05-20	Male	2557	Invalid	2014-05-22	27	sp.	Website
	1986	bee	1721	Unknown	Not a bumble bee	Illinois	United States	2014-05-12	Male	5422	Invalid	2014-05-22	27	fervidus	Website
	1993	bee	1728	Unknown	Not a bumble bee	Washington	United States	2014-05-20	Female	1697	Invalid	2017-01-20	27	morrisoni	Website
	1994	bee	1729	Unknown	Not a bumble bee	Illinois	United States	2014-05-21	Male	1233	Invalid	2014-05-22	27	sp.	Website
	1998	bee	1734	impatiens	Common eastern bumble bee	Ontario	Canada	2014-05-21	Female	211	Verified	2014-05-22	27	auricomus	Website
	1999	bee	1735	impatiens	Common eastern bumble bee	Michigan	United States	2014-05-17	Female	918	Verified	2014-05-22	27	affinis	Website
	2000	bee	1736	impatiens	Common eastern bumble bee	Nova Scotia	Canada	2014-05-21	Female	7611	Verified	2017-03-31	25	impatiens	Website
	2004	bee	1740	bimaculatus	Two-spotted bumble bee	Ontario	Canada	2014-05-20	Female	4212	Verified	2017-06-12	34	impatiens	Website
	2005	bee	1741	Unknown	Not a bumble bee	Ohio	United States	2014-05-20	Female	4891	Invalid	2017-12-04	27	sp.	Website
	2009	bee	1746	sp.	Bumble bee	Alberta	Canada	2014-05-21	Female	8414	Verified	2017-12-04	27	sylvicola	Website
	2012	bee	1749	huntii	Hunt's bumble bee	Wyoming	United States	2014-05-15	Female	4777	Verified	2017-12-04	27	centralis	Website
	2014	bee	1752	sp.	Bumble bee	Massachusetts	United States	2014-05-19	Female	1492	Verified	2017-12-04	27	griseocollis	Website
	2015	bee	1754	Unknown	Not a bumble bee	Oregon	United States	2014-05-22	Female	3210	Invalid	2017-08-08	27	kirbiellus	Website
	2016	bee	1755	griseocollis	Brown-belted bumble bee	Virginia	United States	2014-05-22	Female	239	Verified	2017-12-04	27	griseocollis	Website
	2019	bee	1758	centralis	Central bumble bee	Alberta	Canada	2014-05-22	Female	8414	Verified	2017-12-04	27	sp.	Website
	2020	bee	1759	centralis	Central bumble bee	Alberta	Canada	2014-05-22	Female	8414	Verified	2016-09-16	28	sp.	Website
	2022	bee	1761	mixtus	Fuzzy-horned bumble bee	Oregon	United States	2014-05-12	Female	5886	Verified	2017-08-08	27	mixtus	Website
	2024	bee	1763	mixtus	Fuzzy-horned bumble bee	Oregon	United States	2014-05-12	Female	5886	Verified	2017-08-08	27	mixtus	Website
	2025	bee	1764	ternarius	Tri-colored bumble bee	Alberta	Canada	2014-05-22	Female	8414	Verified	2016-09-16	28	ternarius	Website
	2027	bee	1766	mixtus	Fuzzy-horned bumble bee	Oregon	United States	2014-05-13	Female	4008	Verified	2017-11-08	25	mixtus	Website
	2028	bee	1767	fervidus	Yellow bumble bee	Oregon	United States	2014-05-22	Female	4008	Verified	2017-11-15	25	fervidus	Website
	2029	bee	1768	ternarius	Tri-colored bumble bee	Alberta	Canada	2014-05-22	Female	2136	Verified	2017-12-04	27	sp.	Website
	2030	bee	1769	sp.	Bumble bee	Alberta	Canada	2014-05-22	Female	2136	Verified	2017-12-04	27	sp.	Website
	2032	bee	1771	griseocollis	Brown-belted bumble bee	Wyoming	United States	2014-05-22	Female	7574	Verified	2017-12-04	27	vagans	Website
	2035	bee	1774	melanopygus	Black-tailed bumble bee	Washington	United States	2014-05-15	Female	5861	Verified	2017-09-26	25	flavifrons	Website
	2037	bee	1776	flavifrons	Yellow head bumble bee	Washington	United States	2014-05-16	Female	5861	Verified	2017-09-26	25	sp.	Website
	2038	bee	1777	mixtus	Fuzzy-horned bumble bee	Washington	United States	2014-05-16	Female	5861	Verified	2017-09-26	25	mixtus	Website
	2039	bee	1778	mixtus	Fuzzy-horned bumble bee	Washington	United States	2014-05-16	Female	5861	Verified	2017-09-26	25	sp.	Website
	2041	bee	1780	sp.	Bumble bee	Washington	United States	2014-05-20	Female	5861	Verified	2017-09-26	25	sp.	Website
	2043	bee	1782	mixtus	Fuzzy-horned bumble bee	Washington	United States	2014-05-20	Female	5861	Verified	2017-09-26	25	sp.	Website
	2045	bee	1785	mixtus	Fuzzy-horned bumble bee	Washington	United States	2014-05-20	Female	5861	Verified	2017-09-26	25	sp.	Website
	2046	bee	1786	Unknown	Not a bumble bee	Washington	United States	2014-05-21	Male	5861	Invalid	2014-09-08	8	sp.	Website
	2049	bee	1789	melanopygus	Black-tailed bumble bee	Washington	United States	2014-05-21	Female	5861	Verified	2017-09-26	25	sp.	Website
	2050	bee	1790	mixtus	Fuzzy-horned bumble bee	Washington	United States	2014-05-21	Female	5861	Verified	2017-09-26	25	sp.	Website
	2051	bee	1791	mixtus	Fuzzy-horned bumble bee	Washington	United States	2014-05-21	Female	5861	Verified	2017-09-26	25	sp.	Website
	2053	bee	1793	sp.	Bumble bee	Washington	United States	2014-05-21	Female	5861	Verified	2017-09-26	25	sp.	Website
	2054	bee	1794	flavifrons	Yellow head bumble bee	Washington	United States	2014-05-22	Female	5861	Verified	2017-09-26	25	sp.	Website
	2057	bee	1797	vosnesenskii or caliginosus	Yellow-faced group	Oregon	United States	2014-05-22	Female	8236	Verified	2017-11-21	25	vosnesenskii	Website
	2059	bee	1801	bimaculatus	Two-spotted bumble bee	Virginia	United States	2014-05-23	Female	2441	Verified	2017-06-23	25	bimaculatus	Website
	2060	bee	1802	centralis	Central bumble bee	Idaho	United States	2014-05-22	Female	8317	Verified	2017-08-09	27	centralis	Website
	2061	bee	1804	mixtus	Fuzzy-horned bumble bee	Washington	United States	2014-05-23	Female	5861	Verified	2017-09-26	25	sp.	Website
	2062	bee	1806	mixtus	Fuzzy-horned bumble bee	Washington	United States	2014-05-23	Female	5861	Verified	2017-09-26	25	sp.	Website
	2063	bee	1807	vosnesenskii or caliginosus	Yellow-faced group	California	United States	2014-05-23	Female	7500	Verified	2017-12-04	27	sp.	Website
	2064	bee	1808	griseocollis	Brown-belted bumble bee	Ontario	Canada	2014-05-21	Female	1257	Verified	2017-06-12	34	griseocollis	Website
	2065	bee	1809	mixtus	Fuzzy-horned bumble bee	British Columbia	Canada	2014-05-23	Female	2774	Verified	2017-12-04	27	sp.	Website
	2066	bee	1810	nevadensis	Nevada bumble bee	Wyoming	United States	2014-05-23	Female	7574	Verified	2017-12-04	27	nevadensis	Website
	2067	bee	1811	vosnesenskii	Yellow-faced bumble bee	British Columbia	Canada	2013-06-04	Female	2852	Verified	2017-12-04	27	sp.	Website
	2068	bee	1812	melanopygus	Black-tailed bumble bee	British Columbia	Canada	2013-06-04	Female	2852	Verified	2017-12-04	27	ternarius	Website
	2070	bee	1815	mixtus	Fuzzy-horned bumble bee	Idaho	United States	2014-05-24	Female	2429	Verified	2017-08-09	27	sp.	Website
	2071	bee	1816	Unknown	Not a bumble bee	Ontario	Canada	2014-05-24	Female	4196	Invalid	2017-12-04	27	griseocollis	Website
	2072	bee	1817	vosnesenskii	Yellow-faced bumble bee	Washington	United States	2014-05-21	Female	712	Verified	2017-09-26	25	caliginosus	Website
	2073	bee	1818	Unknown	Not a bumble bee	Maine	United States	2014-05-24	Female	5767	Invalid	2017-12-04	27	ternarius	Website
	2075	bee	1820	melanopygus	Black-tailed bumble bee	California	United States	2014-04-21	Female	2562	Verified	2017-12-04	27	melanopygus	Website
	2077	bee	1822	ternarius	Tri-colored bumble bee	Maine	United States	2014-05-24	Female	5767	Verified	2017-12-04	27	ternarius	Website
	2078	bee	1823	bimaculatus	Two-spotted bumble bee	New Hampshire	United States	2014-05-24	Female	3237	Verified	2017-12-04	27	impatiens	Website
	2082	bee	1827	sp.	Bumble bee	Montana	United States	2014-05-23	Female	6308	Verified	2017-12-04	27	kirbiellus	Website
	2083	bee	1828	huntii	Hunt's bumble bee	Montana	United States	2014-05-22	Female	6308	Verified	2017-12-04	27	ternarius	Website
	2084	bee	1829	Unknown	Not a bumble bee	Montana	United States	2014-05-22	Female	6308	Invalid	2017-12-04	27	nevadensis	Website
	2085	bee	1830	sp.	Bumble bee	Montana	United States	2014-05-20	Female	6308	Verified	2017-12-04	27	rufocinctus	Website
	2086	bee	1831	sylvicola	Forest bumble bee	Montana	United States	2014-05-18	Female	6308	Verified	2017-12-04	27	sylvicola	Website
	2087	bee	1832	vosnesenskii or caliginosus	Yellow-faced group	Oregon	United States	2014-05-02	Female	2180	Verified	2017-11-17	25	caliginosus	Website
	2088	bee	1833	Unknown	Not a bumble bee	California	United States	2014-05-24	Male	4820	Invalid	2014-09-22	8	sp.	Website
	2089	bee	1834	Unknown	Not a bumble bee	California	United States	2014-05-24	Male	4820	Invalid	2014-09-22	8	sp.	Website
	2090	bee	1835	mixtus	Fuzzy-horned bumble bee	Oregon	United States	2014-05-23	Female	5886	Verified	2017-08-08	27	mixtus	Website
	2091	bee	1836	Unknown	Not a bumble bee	Missouri	United States	2011-06-06	Not Determined	740	Invalid	2017-03-31	25	impatiens	Website
	2092	bee	1837	vosnesenskii	Yellow-faced bumble bee	California	United States	2014-05-24	Female	268	Verified	2017-12-04	27	caliginosus	Website
	2094	bee	1839	vandykei	van Dyke bumble bee	Oregon	United States	2014-05-20	Male	7685	Verified	2017-02-25	27	suckleyi	Website
	2096	bee	1841	impatiens	Common eastern bumble bee	Maine	United States	2014-05-24	Female	5767	Verified	2017-03-31	25	impatiens	Website
	2097	bee	1842	mixtus	Fuzzy-horned bumble bee	Washington	United States	2014-05-24	Female	8226	Verified	2017-09-26	25	mixtus	Website
	2098	bee	1843	Unknown	Not a bumble bee	Wisconsin	United States	2014-05-21	Male	5804	Invalid	2014-05-27	30	affinis	Website
	2100	bee	1846	Unknown	Not a bumble bee	Wisconsin	United States	2014-05-08	Female	5804	Invalid	2017-12-04	27	sp.	Website
	2102	bee	1848	sp.	Bumble bee	Wisconsin	United States	2014-05-25	Female	3947	Verified	2017-12-04	27	fervidus	Website
	2103	bee	1849	sp.	Bumble bee	Massachusetts	United States	2014-05-24	Female	6804	Verified	2017-12-04	27	impatiens	Website
	2104	bee	1850	mixtus	Fuzzy-horned bumble bee	Washington	United States	2014-05-19	Female	6145	Verified	2017-09-26	25	sp.	Website
	2106	bee	1852	flavifrons	Yellow head bumble bee	Washington	United States	2014-04-28	Female	6145	Verified	2017-09-26	25	sp.	Website
	2107	bee	1853	griseocollis	Brown-belted bumble bee	Iowa	United States	2014-05-25	Female	5619	Verified	2017-12-04	27	vagans	Website
	2108	bee	1854	vagans	Half-black bumble bee	British Columbia	Canada	2014-05-25	Female	2386	Verified	2017-12-04	27	sp.	Website
	2109	bee	1855	Unknown	Not a bumble bee	Ohio	United States	2014-05-25	Not Determined	4891	Invalid	2017-03-31	25	impatiens	Website
	2110	bee	1856	griseocollis	Brown-belted bumble bee	Virginia	United States	2014-05-25	Female	2441	Verified	2017-12-04	27	griseocollis	Website
	2111	bee	1857	Unknown	Not a bumble bee	California	United States	2014-05-24	Female	6565	Invalid	2017-12-04	27	griseocollis	Website
	2114	bee	1860	impatiens	Common eastern bumble bee	Georgia	United States	2014-05-26	Female	8502	Verified	2017-12-04	27	bimaculatus	Website
	2115	bee	1861	impatiens	Common eastern bumble bee	Georgia	United States	2014-05-26	Female	8502	Verified	2017-12-04	27	bimaculatus	Website
	2116	bee	1862	impatiens	Common eastern bumble bee	Maryland	United States	2014-05-26	Female	5617	Verified	2017-03-31	25	impatiens	Website
	2117	bee	1863	Unknown	Not a bumble bee	Maryland	United States	2014-05-26	Male	5617	Invalid	2014-09-22	8	sp.	Website
	2121	bee	1867	vosnesenskii or caliginosus	Yellow-faced group	Washington	United States	2014-05-24	Female	3779	Verified	2017-09-26	25	caliginosus	Website
	2125	bee	1871	impatiens	Common eastern bumble bee	Florida	United States	2014-05-21	Female	7475	Verified	2017-12-04	27	variabilis	Website
	2127	bee	1873	Unknown	Not a bumble bee	British Columbia	Canada	2014-05-26	Female	6962	Invalid	2017-12-04	27	sp.	Website
	2128	bee	1874	Unknown	Not a bumble bee	Michigan	United States	2014-05-25	Male	5083	Invalid	2014-09-15	8	sp.	Website
	2129	bee	1875	melanopygus	Black-tailed bumble bee	Oregon	United States	2014-05-26	Female	2897	Verified	2017-11-16	25	melanopygus	Website
	2130	bee	1877	Unknown	Not a bumble bee	Washington	United States	2014-05-26	Male	2333	Invalid	2014-09-08	8	sp.	Website
	2133	bee	1880	melanopygus	Black-tailed bumble bee	British Columbia	Canada	2014-05-26	Female	6962	Verified	2017-12-04	27	rufocinctus	Website
	2134	bee	1881	fervidus	Yellow bumble bee	British Columbia	Canada	2014-05-26	Female	6962	Verified	2017-07-06	27	terricola	Website
	2136	bee	1884	Unknown	Not a bumble bee	Wisconsin	United States	2014-05-25	Female	1495	Invalid	2017-12-04	27	citrinus	Website
	2137	bee	1886	mixtus	Fuzzy-horned bumble bee	Washington	United States	2014-05-26	Female	4250	Verified	2017-09-26	25	mixtus	Website
	2138	bee	1887	melanopygus	Black-tailed bumble bee	Washington	United States	2014-05-26	Male	1986	Verified	2017-08-02	27	sp.	Website
	2139	bee	1888	mixtus	Fuzzy-horned bumble bee	Washington	United States	2014-05-26	Female	5861	Verified	2017-09-26	25	mixtus	Website
	2140	bee	1889	mixtus	Fuzzy-horned bumble bee	Washington	United States	2014-05-26	Female	5861	Verified	2017-09-26	25	mixtus	Website
	2141	bee	1890	sp.	Bumble bee	Washington	United States	2014-05-26	Female	5861	Verified	2017-09-26	25	sp.	Website
	2142	bee	1891	vosnesenskii or caliginosus	Yellow-faced group	Washington	United States	2014-05-17	Female	722	Verified	2017-09-26	25	insularis	Website
	2143	bee	1892	mixtus	Fuzzy-horned bumble bee	Washington	United States	2014-05-18	Female	722	Verified	2017-09-26	25	sitkensis	Website
	2144	bee	1893	melanopygus	Black-tailed bumble bee	Washington	United States	2014-05-19	Female	722	Verified	2017-09-26	25	sp.	Website
	2145	bee	1894	mixtus	Fuzzy-horned bumble bee	Washington	United States	2014-05-24	Female	722	Verified	2017-09-26	25	mixtus	Website
	2146	bee	1895	vosnesenskii	Yellow-faced bumble bee	Washington	United States	2014-05-24	Female	722	Verified	2017-09-26	25	caliginosus	Website
	2147	bee	1896	melanopygus	Black-tailed bumble bee	Washington	United States	2014-05-26	Female	5166	Verified	2017-09-26	25	kirbiellus	Website
	2148	bee	1897	vosnesenskii or caliginosus	Yellow-faced group	Washington	United States	2014-05-26	Female	5166	Verified	2017-09-26	25	caliginosus	Website
	2154	bee	1903	Unknown	Not a bumble bee	Florida	United States	2014-05-26	Male	3916	Invalid	2014-05-28	27	sp.	Website
	2155	bee	1904	Unknown	Not a bumble bee	Florida	United States	2014-05-26	Male	3916	Invalid	2014-05-28	27	sp.	Website
	2156	bee	1905	Unknown	Not a bumble bee	Massachusetts	United States	2014-05-26	Male	5144	Invalid	2014-05-27	30	sp.	Website
	2168	bee	1917	Unknown	Not a bumble bee	Illinois	United States	2014-05-27	Male	399	Invalid	2014-05-28	27	sp.	Website
	2169	bee	1918	Unknown	Not a bumble bee	Wisconsin	United States	2014-05-27	Male	4366	Invalid	2014-05-28	27	sp.	Website
	2175	bee	1924	melanopygus	Black-tailed bumble bee	Washington	United States	2014-05-22	Female	7479	Verified	2017-10-12	25	sp.	Website
	2188	bee	1938	vosnesenskii or caliginosus	Yellow-faced group	California	United States	2014-05-28	Female	175	Verified	2017-12-04	27	vosnesenskii or caliginosus	Website
	2191	bee	1942	Unknown	Not a bumble bee	Oregon	United States	2014-05-28	Not Determined	5098	Invalid	2017-11-23	25	sp.	Website
	2193	bee	1944	Unknown	Not a bumble bee	Georgia	United States	2014-04-24	Male	1673	Invalid	2014-05-28	27	sp.	Website
	2194	bee	1945	Unknown	Not a bumble bee	Georgia	United States	2014-04-24	Male	1673	Invalid	2014-05-28	27	sp.	Website
	2195	bee	1946	Unknown	Not a bumble bee	Georgia	United States	2014-04-24	Male	1673	Invalid	2014-05-28	27	sp.	Website
	2198	bee	1949	pensylvanicus	American bumble bee	New Mexico	United States	2014-05-28	Female	8238	Verified	2014-05-28	27	occidentalis	Website
	2207	bee	1958	Unknown	Not a bumble bee	California	United States	2014-05-28	Male	4820	Invalid	2014-05-28	27	sp.	Website
	2208	bee	1960	impatiens	Common eastern bumble bee	Ontario	Canada	2014-05-28	Female	1025	Verified	2017-06-12	34	griseocollis	Website
	2209	bee	1961	impatiens	Common eastern bumble bee	Florida	United States	2014-05-26	Female	1330	Verified	2017-03-31	25	impatiens	Website
	2210	bee	1962	griseocollis	Brown-belted bumble bee	Wyoming	United States	2014-05-28	Female	3149	Verified	2017-12-04	27	griseocollis	Website
	2212	bee	1964	mixtus	Fuzzy-horned bumble bee	Wyoming	United States	2013-09-02	Female	3149	Verified	2017-12-04	27	mixtus	Website
	2217	bee	1969	Unknown	Not a bumble bee	Oregon	United States	2014-05-29	Male	3080	Invalid	2014-06-01	30	sp.	Website
	2219	bee	1972	fervidus	Yellow bumble bee	Wisconsin	United States	2013-08-20	Female	5334	Verified	2017-12-04	27	fervidus	Website
	2220	bee	1973	flavifrons	Yellow head bumble bee	Washington	United States	2014-05-29	Female	6145	Verified	2017-10-05	25	sp.	Website
	2221	bee	1974	sp.	Bumble bee	Idaho	United States	2014-05-26	Female	1994	Verified	2017-08-09	27	kirbiellus	Website
	2223	bee	1976	Unknown	Not a bumble bee	Wisconsin	United States	2014-05-29	Female	6795	Invalid	2017-12-04	27	borealis	Website
	2224	bee	1977	sp.	Bumble bee	Ontario	Canada	2014-05-28	Female	5060	Verified	2017-12-04	27	griseocollis	Website
	2226	bee	1979	impatiens	Common eastern bumble bee	Iowa	United States	2014-05-30	Female	5161	Verified	2017-12-04	27	fervidus	Website
	2228	bee	1981	mixtus	Fuzzy-horned bumble bee	British Columbia	Canada	2014-05-29	Female	4357	Verified	2017-12-04	27	mixtus	Website
	2229	bee	1982	melanopygus	Black-tailed bumble bee	British Columbia	Canada	2014-05-29	Female	4357	Verified	2017-12-04	27	flavifrons	Website
	2230	bee	1983	Unknown	Not a bumble bee	California	United States	2014-05-30	Male	4040	Invalid	2014-09-29	8	sp.	Website
	2232	bee	1985	Unknown	Not a bumble bee	Oregon	United States	2014-05-29	Female	6503	Invalid	2015-02-02	8	sp.	Website
	2233	bee	1986	Unknown	Not a bumble bee	Oregon	United States	2014-05-29	Not Determined	6503	Invalid	2014-11-24	27	sp.	Website
	2234	bee	1987	Unknown	Not a bumble bee	Illinois	United States	2014-05-30	Male	8299	Invalid	2014-06-01	30	sp.	Website
	2235	bee	1988	nevadensis	Nevada bumble bee	Washington	United States	2014-05-30	Female	4099	Verified	2017-10-05	25	nevadensis	Website
	2236	bee	1989	Unknown	Not a bumble bee	Ontario	Canada	2014-05-30	Male	4196	Invalid	2014-09-08	8	sp.	Website
	2237	bee	1990	sp.	Bumble bee	Texas	United States	2014-05-30	Female	3477	Verified	2017-12-04	27	auricomus	Website
	2238	bee	1992	griseocollis	Brown-belted bumble bee	Illinois	United States	2014-05-24	Female	3906	Verified	2017-12-04	27	griseocollis	Website
	2239	bee	1993	Unknown	Not a bumble bee	Illinois	United States	2014-05-24	Female	3906	Invalid	2014-06-01	30	sp.	Website
	2240	bee	1994	Unknown	Not a bumble bee	Ontario	Canada	2014-05-30	Female	1082	Invalid	2017-12-04	27	sp.	Website
	2242	bee	1996	bimaculatus	Two-spotted bumble bee	Minnesota	United States	2014-05-29	Queen	791	Verified	2017-06-15	7	griseocollis	Website
	2243	bee	1997	griseocollis	Brown-belted bumble bee	Minnesota	United States	2014-05-30	Female	791	Verified	2017-03-12	7	griseocollis	Website
	2244	bee	1998	Unknown	Not a bumble bee	Massachusetts	United States	2014-05-31	Female	6804	Invalid	2017-12-04	27	sandersoni	Website
	2246	bee	2000	vosnesenskii	Yellow-faced bumble bee	Oregon	United States	2014-05-30	Female	5886	Verified	2017-08-08	27	vosnesenskii	Website
	2247	bee	2001	nevadensis	Nevada bumble bee	Wyoming	United States	2014-05-31	Female	1243	Verified	2017-12-04	27	nevadensis	Website
	2249	bee	2003	Unknown	Not a bumble bee	Minnesota	United States	2014-05-24	Not Determined	6284	Invalid	2017-03-31	25	impatiens	Website
	2250	bee	2004	pensylvanicus	American bumble bee	Nebraska	United States	2014-05-31	Female	1935	Verified	2014-06-06	24	pensylvanicus	Website
	2251	bee	2005	Unknown	Not a bumble bee	Kentucky	United States	2014-05-30	Male	6308	Invalid	2014-09-22	8	sp.	Website
	2254	bee	2008	rufocinctus	Red-belted bumble bee	Oregon	United States	2014-04-30	Not Determined	7811	Verified	2017-08-06	27	vagans	Website
	2255	bee	2009	Unknown	Not a bumble bee	Oregon	United States	2014-05-27	Female	7811	Invalid	2014-06-01	30	sp.	Website
	2260	bee	2014	mixtus	Fuzzy-horned bumble bee	Oregon	United States	2014-05-25	Female	7811	Verified	2017-11-17	25	rufocinctus	Website
	2261	bee	2015	Unknown	Not a bumble bee	Idaho	United States	2014-05-19	Female	3029	Invalid	2017-08-09	27	sp.	Website
	2263	bee	2017	Unknown	Not a bumble bee	Minnesota	United States	2014-05-22	Female	2072	Invalid	2017-06-23	25	bimaculatus	Website
	2264	bee	2018	Unknown	Not a bumble bee	Maryland	United States	2014-06-01	Male	5617	Invalid	2014-06-01	30	griseocollis	Website
	2265	bee	2019	occidentalis	Western bumble bee	Alberta	Canada	2014-05-31	Female	8414	Verified	2017-04-27	4	sp.	Website
	2266	bee	2020	nevadensis	Nevada bumble bee	Alberta	Canada	2014-05-31	Female	8414	Verified	2016-09-16	28	vagans	Website
	2268	bee	2022	ternarius	Tri-colored bumble bee	Wisconsin	United States	2014-05-24	Female	3324	Verified	2014-06-06	24	ternarius	Website
	2269	bee	2023	griseocollis	Brown-belted bumble bee	Nebraska	United States	2014-06-01	Female	1935	Verified	2014-06-06	24	griseocollis	Website
	2270	bee	2024	Unknown	Not a bumble bee	British Columbia	Canada	2014-05-31	Female	2774	Invalid	2017-12-04	27	sp.	Website
	2273	bee	2028	flavifrons	Yellow head bumble bee	Washington	United States	2014-06-01	Female	712	Verified	2017-10-27	25	sp.	Website
	2274	bee	2029	Unknown	Not a bumble bee	Colorado	United States	2014-05-31	Male	6263	Invalid	2014-06-01	30	sp.	Website
	2275	bee	2030	bimaculatus	Two-spotted bumble bee	New York	United States	2014-05-26	Female	1545	Verified	2017-12-04	27	bimaculatus	Website
	2277	bee	2032	sp.	Bumble bee	Oregon	United States	2014-06-01	Female	4	Verified	2017-11-21	25	vosnesenskii	Website
	2278	bee	2034	griseocollis	Brown-belted bumble bee	Virginia	United States	2014-05-23	Female	239	Verified	2014-06-06	24	griseocollis	Website
	2279	bee	2035	fervidus	Yellow bumble bee	Virginia	United States	2014-05-23	Female	239	Verified	2017-12-04	27	fervidus	Website
	2280	bee	2036	bimaculatus	Two-spotted bumble bee	Ontario	Canada	2014-06-01	Female	1082	Verified	2014-06-01	24	affinis	Website
	2281	bee	2037	griseocollis	Brown-belted bumble bee	Virginia	United States	2014-05-25	Female	239	Verified	2017-12-04	27	griseocollis	Website
	2282	bee	2038	bimaculatus	Two-spotted bumble bee	Virginia	United States	2014-06-01	Female	239	Verified	2017-12-04	27	bimaculatus	Website
	2283	bee	2039	impatiens	Common eastern bumble bee	Ontario	Canada	2014-06-01	Female	1082	Verified	2017-10-06	34	bimaculatus	Website
	2284	bee	2040	bimaculatus	Two-spotted bumble bee	Ontario	Canada	2014-06-01	Female	1082	Verified	2017-10-06	34	bimaculatus	Website
	2285	bee	2041	flavifrons	Yellow head bumble bee	Washington	United States	2014-06-01	Female	5700	Verified	2017-11-14	25	sylvicola	Website
	2289	bee	2045	Unknown	Not a bumble bee	Idaho	United States	2014-05-23	Female	1151	Invalid	2015-02-05	27	sp.	Website
	2290	bee	2046	auricomus	Black and gold bumble bee	Minnesota	United States	2014-06-01	Female	7300	Verified	2014-06-06	24	auricomus	Website
	2291	bee	2047	Unknown	Not a bumble bee	Michigan	United States	2014-05-25	Female	6434	Invalid	2014-06-06	24	sp.	Website
	2292	bee	2048	Unknown	Not a bumble bee	Wisconsin	United States	2014-06-01	Female	6434	Invalid	2017-12-04	27	sandersoni	Website
	2294	bee	2050	Unknown	Not a bumble bee	Wisconsin	United States	2014-06-01	Male	6434	Invalid	2014-06-02	30	sp.	Website
	2295	bee	2051	Unknown	Not a bumble bee	Wisconsin	United States	2014-06-01	Male	6434	Invalid	2014-06-02	30	fervidus	Website
	2296	bee	2052	griseocollis	Brown-belted bumble bee	Michigan	United States	2014-06-01	Female	4034	Verified	2014-06-06	24	griseocollis	Website
	2301	bee	2057	griseocollis	Brown-belted bumble bee	Virginia	United States	2014-06-02	Female	239	Verified	2014-06-06	24	griseocollis	Website
	2303	bee	2060	impatiens	Common eastern bumble bee	Minnesota	United States	2014-06-02	Female	5786	Verified	2017-05-17	7	sp.	Website
	2304	bee	2061	bimaculatus	Two-spotted bumble bee	Ontario	Canada	2014-06-02	Female	140	Verified	2014-06-05	24	bimaculatus	Website
	2305	bee	2063	Unknown	Not a bumble bee	Wisconsin	United States	2014-06-01	Male	5001	Invalid	2014-06-17	30	affinis	Website
	2306	bee	2064	Unknown	Not a bumble bee	California	United States	2014-06-02	Female	5974	Invalid	2017-12-04	27	sp.	Website
	2307	bee	2065	borealis	Northern amber bumble bee	Alberta	Canada	2014-06-02	Female	2856	Verified	2016-09-16	28	borealis	Website
	2308	bee	2066	impatiens	Common eastern bumble bee	Nebraska	United States	2014-06-02	Female	5126	Verified	2014-06-05	24	impatiens	Website
	2309	bee	2067	Unknown	Not a bumble bee	Michigan	United States	2014-05-25	Female	6116	Invalid	2017-12-04	27	variabilis	Website
	2311	bee	2069	melanopygus	Black-tailed bumble bee	Washington	United States	2014-05-28	Female	5861	Verified	2017-10-27	25	sp.	Website
	2312	bee	2070	sp.	Bumble bee	Washington	United States	2014-05-28	Female	5861	Verified	2017-10-27	25	sp.	Website
	2313	bee	2071	flavifrons	Yellow head bumble bee	Washington	United States	2014-05-28	Female	5861	Verified	2017-10-27	25	sp.	Website
	2314	bee	2072	Unknown	Not a bumble bee	Washington	United States	2014-05-28	Male	5861	Invalid	2014-09-08	8	sp.	Website
	2316	bee	2074	Unknown	Not a bumble bee	Washington	United States	2014-05-28	Male	5861	Invalid	2014-09-08	8	sp.	Website
	2317	bee	2075	melanopygus	Black-tailed bumble bee	Washington	United States	2014-05-28	Female	5861	Verified	2017-10-27	25	sp.	Website
	2318	bee	2076	Unknown	Not a bumble bee	Texas	United States	2014-06-03	Female	3477	Invalid	2017-12-04	27	variabilis	Website
	2320	bee	2079	melanopygus	Black-tailed bumble bee	Oregon	United States	2014-06-02	Female	3080	Verified	2017-11-23	25	sp.	Website
	2322	bee	2081	griseocollis	Brown-belted bumble bee	Nebraska	United States	2014-06-03	Female	5126	Verified	2017-12-04	27	nevadensis	Website
	2323	bee	2083	Unknown	Not a bumble bee	Pennsylvania	United States	2014-06-03	Male	6487	Invalid	2014-06-04	24	sp.	Website
	2324	bee	2084	ternarius	Tri-colored bumble bee	Alberta	Canada	2014-06-02	Female	8414	Verified	2017-04-27	4	sp.	Website
	2325	bee	2085	ternarius	Tri-colored bumble bee	Alberta	Canada	2014-06-02	Female	8414	Verified	2017-04-27	4	sp.	Website
	2330	bee	2090	rufocinctus	Red-belted bumble bee	Michigan	United States	2008-08-20	Male	1902	Verified	2014-06-04	24	rufocinctus	Website
	2335	bee	2096	fervidus	Yellow bumble bee	California	United States	2014-06-01	Female	4656	Verified	2017-12-05	27	fervidus	Website
	2336	bee	2097	sp.	Bumble bee	Washington	United States	2014-06-03	Female	4	Verified	2017-11-14	25	fervidus	Website
	2337	bee	2098	griseocollis	Brown-belted bumble bee	New Jersey	United States	2014-06-04	Female	4917	Verified	2017-12-05	27	griseocollis	Website
	2338	bee	2099	Unknown	Not a bumble bee	Ontario	Canada	2011-05-13	Female	2818	Invalid	2017-06-12	34	ternarius	Website
	2341	bee	2103	bimaculatus	Two-spotted bumble bee	New York	United States	2014-06-04	Female	4997	Verified	2014-06-04	24	bimaculatus	Website
	2342	bee	2105	fervidus	Yellow bumble bee	Colorado	United States	2014-05-29	Female	1690	Verified	2017-12-05	27	sp.	Website
	2347	bee	2110	Unknown	Not a bumble bee	Ohio	United States	2014-06-03	Male	7306	Invalid	2014-06-05	27	sp.	Website
	2352	bee	2116	Unknown	Not a bumble bee	Ontario	Canada	2014-06-05	Female	7840	Invalid	2014-06-05	30	sp.	Website
	2354	bee	2118	sp.	Bumble bee	Ontario	Canada	2014-06-05	Female	2069	Verified	2017-12-05	27	sp.	Website
	2355	bee	2119	vosnesenskii	Yellow-faced bumble bee	Washington	United States	2014-06-05	Female	25	Verified	2017-12-05	27	fervidus	Website
	2356	bee	2120	mixtus	Fuzzy-horned bumble bee	Washington	United States	2014-06-02	Female	5550	Verified	2017-11-14	25	kirbiellus	Website
	2357	bee	2121	sp.	Bumble bee	Ontario	Canada	2014-06-05	Female	4062	Verified	2017-12-05	27	kirbiellus	Website
	2358	bee	2122	vosnesenskii	Yellow-faced bumble bee	Washington	United States	2014-03-19	Female	5966	Verified	2017-12-05	27	insularis	Website
	2360	bee	2125	sp.	Bumble bee	Minnesota	United States	2014-06-01	Female	6090	Verified	2017-12-05	27	auricomus	Website
	2362	bee	2127	Unknown	Not a bumble bee	Ontario	Canada	2014-06-05	Male	6185	Invalid	2014-06-06	30	sp.	Website
	2363	bee	2128	Unknown	Not a bumble bee	Ontario	Canada	2014-06-05	Female	6185	Invalid	2014-06-06	30	sp.	Website
	2364	bee	2129	Unknown	Not a bumble bee	Minnesota	United States	2014-06-06	Female	2973	Invalid	2017-08-12	34	ternarius	Website
	2365	bee	2130	sp.	Bumble bee	Ontario	Canada	2014-06-05	Female	6185	Verified	2017-12-05	27	sp.	Website
	2366	bee	2131	Unknown	Not a bumble bee	Minnesota	United States	2014-06-06	Female	2973	Invalid	2017-12-05	27	fervidus	Website
	2367	bee	2132	impatiens	Common eastern bumble bee	Massachusetts	United States	2014-06-06	Female	6804	Verified	2017-03-31	25	impatiens	Website
	2368	bee	2133	mixtus	Fuzzy-horned bumble bee	Washington	United States	2014-06-01	Female	1930	Verified	2017-10-06	25	mixtus	Website
	2370	bee	2135	impatiens	Common eastern bumble bee	Quebec	Canada	2014-06-06	Female	5471	Verified	2017-03-31	25	impatiens	Website
	2372	bee	2137	fervidus	Yellow bumble bee	California	United States	2014-06-06	Female	4656	Verified	2017-12-05	27	fervidus	Website
	2373	bee	2138	vagans, sandersoni or perplexus	Two-yellow striped group	Ontario	Canada	2014-06-06	Female	5621	Verified	2017-10-06	34	impatiens	Website
	2374	bee	2139	Unknown	Not a bumble bee	Pennsylvania	United States	2014-05-14	Female	2804	Invalid	2017-12-05	27	sp.	Website
	2375	bee	2141	sp.	Bumble bee	Pennsylvania	United States	2009-06-07	Female	2804	Verified	2017-12-05	27	sp.	Website
	2376	bee	2142	Unknown	Not a bumble bee	Nevada	United States	2014-05-25	Male	3634	Invalid	2014-09-25	21	occidentalis	Website
	2377	bee	2143	Unknown	Not a bumble bee	Nevada	United States	2014-06-03	Not Determined	3634	Invalid	2015-05-08	27	sp.	Website
	2378	bee	2144	ternarius	Tri-colored bumble bee	Minnesota	United States	2014-06-06	Male	2973	Verified	2017-06-02	7	ternarius	Website
	2382	bee	2148	Unknown	Not a bumble bee	Ontario	Canada	2014-06-07	Male	7097	Invalid	2014-06-08	30	sp.	Website
	2385	bee	2151	sp.	Bumble bee	Wisconsin	United States	2014-06-07	Female	1873	Verified	2017-12-05	27	auricomus	Website
	2386	bee	2152	bimaculatus	Two-spotted bumble bee	Virginia	United States	2014-06-02	Female	7204	Verified	2017-12-05	27	impatiens	Website
	2388	bee	2155	huntii	Hunt's bumble bee	Colorado	United States	2014-06-06	Female	3504	Verified	2017-12-05	27	sp.	Website
	2389	bee	2156	vosnesenskii or caliginosus	Yellow-faced group	Oregon	United States	2014-06-06	Female	5041	Verified	2017-11-15	25	fervidus	Website
	2392	bee	2159	vagans, sandersoni or perplexus	Two-yellow striped group	Ontario	Canada	2014-05-13	Female	211	Verified	2017-12-05	27	rufocinctus	Website
	2393	bee	2160	impatiens	Common eastern bumble bee	Ontario	Canada	2014-06-04	Female	211	Verified	2017-12-05	27	rufocinctus	Website
	2396	bee	2163	Unknown	Not a bumble bee	Colorado	United States	2014-05-25	Male	3504	Invalid	2014-06-08	30	sp.	Website
	2397	bee	2164	vagans, sandersoni or perplexus	Two-yellow striped group	Ontario	Canada	2014-06-08	Female	7871	Verified	2017-06-12	34	sp.	Website
	2399	bee	2166	vosnesenskii or caliginosus	Yellow-faced group	Washington	United States	2014-06-08	Female	1430	Verified	2017-12-05	27	vandykei	Website
	2402	bee	2169	fervidus	Yellow bumble bee	Washington	United States	2014-06-08	Female	6439	Verified	2017-10-19	25	fervidus	Website
	2403	bee	2170	nevadensis	Nevada bumble bee	Idaho	United States	2014-06-01	Female	5683	Verified	2017-08-09	27	nevadensis	Website
	2404	bee	2171	Unknown	Not a bumble bee	Oregon	United States	2014-05-27	Male	2877	Invalid	2014-07-04	27	sp.	Website
	2405	bee	2172	impatiens	Common eastern bumble bee	Ontario	Canada	2014-06-08	Worker	3451	Verified	2018-03-27	34	sp.	Website
	2407	bee	2174	ternarius	Tri-colored bumble bee	Minnesota	United States	2014-06-08	Female	2672	Verified	2017-03-01	7	ternarius	Website
	2408	bee	2175	fraternus	Southern plains bumble bee	Kansas	United States	2011-06-08	Female	3687	Verified	2017-12-05	27	fraternus	Website
	2410	bee	2178	griseocollis	Brown-belted bumble bee	Arkansas	United States	2014-06-09	Female	1421	Verified	2017-12-05	27	griseocollis	Website
	2411	bee	2179	centralis	Central bumble bee	Idaho	United States	2014-06-09	Female	287	Verified	2017-08-09	27	kirbiellus	Website
	2412	bee	2180	centralis	Central bumble bee	Idaho	United States	2014-06-09	Female	287	Verified	2017-08-09	27	centralis	Website
	2413	bee	2181	borealis	Northern amber bumble bee	Ontario	Canada	2014-06-07	Female	4463	Verified	2017-06-12	34	sp.	Website
	2414	bee	2182	ternarius	Tri-colored bumble bee	Minnesota	United States	2014-06-08	Female	1220	Verified	2017-06-02	7	ternarius	Website
	2415	bee	2183	bimaculatus	Two-spotted bumble bee	Pennsylvania	United States	2014-06-07	Female	5749	Verified	2017-12-05	27	sp.	Website
	2416	bee	2184	Unknown	Not a bumble bee	Pennsylvania	United States	2014-06-09	Male	5749	Invalid	2014-09-22	8	sp.	Website
	2417	bee	2185	impatiens	Common eastern bumble bee	Michigan	United States	2014-06-08	Female	7750	Verified	2017-03-31	25	impatiens	Website
	2420	bee	2189	auricomus	Black and gold bumble bee	Missouri	United States	2014-06-07	Female	7938	Verified	2017-12-05	27	fraternus	Website
	2421	bee	2190	griseocollis	Brown-belted bumble bee	Ontario	Canada	2014-06-09	Female	3769	Verified	2017-06-12	34	impatiens	Website
	2423	bee	2192	Unknown	Not a bumble bee	California	United States	2014-06-07	Female	752	Invalid	2017-01-27	27	morrisoni	Website
	2424	bee	2193	impatiens	Common eastern bumble bee	New Brunswick	Canada	2014-06-03	Worker	4152	Verified	2017-09-27	34	impatiens	Website
	2425	bee	2194	Unknown	Not a bumble bee	Ontario	Canada	2014-06-09	Female	2818	Invalid	2017-03-30	25	impatiens	Website
	2426	bee	2195	Unknown	Not a bumble bee	Ontario	Canada	2014-06-09	Female	1048	Invalid	2017-06-12	34	sp.	Website
	2427	bee	2196	vagans, sandersoni or perplexus	Two-yellow striped group	Ontario	Canada	2014-06-03	Female	2422	Verified	2017-12-05	27	sp.	Website
	2428	bee	2197	Unknown	Not a bumble bee	Washington	United States	2014-06-09	Not Determined	581	Invalid	2017-09-14	25	nevadensis	Website
	2429	bee	2198	Unknown	Not a bumble bee	Oregon	United States	2014-06-08	Male	3277	Invalid	2014-07-04	27	sp.	Website
	2430	bee	2199	Unknown	Not a bumble bee	Ontario	Canada	2013-08-15	Female	1048	Invalid	2017-06-12	34	sp.	Website
	2431	bee	2200	Unknown	Not a bumble bee	Ontario	Canada	2014-06-10	Female	6225	Invalid	2017-06-12	34	griseocollis	Website
	2432	bee	2201	nevadensis	Nevada bumble bee	Montana	United States	2014-06-10	Female	3214	Verified	2017-12-05	27	nevadensis	Website
	2435	bee	2205	vosnesenskii	Yellow-faced bumble bee	Washington	United States	2014-06-08	Female	8470	Verified	2017-10-26	25	caliginosus	Website
	2436	bee	2206	bimaculatus	Two-spotted bumble bee	Illinois	United States	2014-06-09	Female	2470	Verified	2017-06-23	25	bimaculatus	Website
	2437	bee	2207	bimaculatus	Two-spotted bumble bee	Illinois	United States	2014-06-09	Female	2470	Verified	2017-06-23	25	bimaculatus	Website
	2438	bee	2208	sp.	Bumble bee	Washington	United States	2014-06-05	Female	89	Verified	2017-10-26	25	caliginosus	Website
	2440	bee	2210	flavifrons	Yellow head bumble bee	Wyoming	United States	2014-06-09	Female	3149	Verified	2017-12-05	27	centralis	Website
	2442	bee	2212	impatiens	Common eastern bumble bee	Ontario	Canada	2014-06-11	Female	3018	Verified	2017-03-30	25	impatiens	Website
	2443	bee	2213	Unknown	Not a bumble bee	Nova Scotia	Canada	2014-06-03	Not Determined	7611	Invalid	2017-09-28	34	vagans	Website
	2445	bee	2215	bimaculatus	Two-spotted bumble bee	Nova Scotia	Canada	2014-05-29	Worker	7611	Verified	2017-09-28	34	vagans	Website
	2446	bee	2216	bimaculatus	Two-spotted bumble bee	Nova Scotia	Canada	2014-05-29	Worker	7611	Verified	2017-09-27	34	impatiens	Website
	2447	bee	2217	vagans	Half-black bumble bee	Minnesota	United States	2014-06-01	Female	5725	Verified	2017-12-05	27	vagans	Website
	2448	bee	2218	Unknown	Not a bumble bee	Nebraska	United States	2014-06-11	Male	4420	Invalid	2014-06-11	30	fraternus	Website
	2449	bee	2219	Unknown	Not a bumble bee	New Hampshire	United States	2014-06-11	Male	3237	Invalid	2014-06-11	30	rufocinctus	Website
	2451	bee	2221	sp.	Bumble bee	Idaho	United States	2014-06-11	Not Determined	3443	Verified	2017-08-09	27	nevadensis	Website
	2453	bee	2224	griseocollis	Brown-belted bumble bee	Minnesota	United States	2014-06-11	Female	7139	Verified	2017-06-02	7	griseocollis	Website
	2454	bee	2225	vosnesenskii	Yellow-faced bumble bee	Washington	United States	2014-06-11	Female	2792	Verified	2017-10-27	25	caliginosus	Website
	2455	bee	2227	vosnesenskii	Yellow-faced bumble bee	Washington	United States	2014-06-09	Female	7312	Verified	2017-10-27	25	caliginosus	Website
	2456	bee	2228	impatiens	Common eastern bumble bee	Missouri	United States	2014-06-11	Female	7938	Verified	2017-03-30	25	impatiens	Website
	2457	bee	2229	auricomus	Black and gold bumble bee	Missouri	United States	2014-06-11	Female	7938	Verified	2017-12-05	27	auricomus	Website
	2458	bee	2230	griseocollis	Brown-belted bumble bee	Missouri	United States	2014-06-11	Female	7938	Verified	2017-12-05	27	sp.	Website
	2460	bee	2232	sp.	Bumble bee	Missouri	United States	2014-06-11	Female	7938	Verified	2017-12-05	27	pensylvanicus	Website
	2461	bee	2233	impatiens	Common eastern bumble bee	New York	United States	2014-06-10	Female	1250	Verified	2017-03-30	25	impatiens	Website
	2462	bee	2235	Unknown	Not a bumble bee	Washington	United States	2014-06-11	Male	6145	Invalid	2014-06-12	30	sp.	Website
	2463	bee	2236	nevadensis	Nevada bumble bee	Wyoming	United States	2014-06-11	Female	3149	Verified	2017-12-05	27	nevadensis	Website
	2465	bee	2238	Unknown	Not a bumble bee	Maryland	United States	2014-06-10	Male	3819	Invalid	2014-06-17	30	affinis	Website
	2466	bee	2239	bimaculatus	Two-spotted bumble bee	Illinois	United States	2014-06-08	Female	3906	Verified	2017-06-23	25	bimaculatus	Website
	2472	bee	2247	vosnesenskii	Yellow-faced bumble bee	Oregon	United States	2014-06-06	Female	737	Verified	2014-07-04	27	caliginosus	Website
	2474	bee	2249	sp.	Bumble bee	Ontario	Canada	2014-06-12	Female	6077	Verified	2017-06-12	34	sp.	Website
	2475	bee	2250	Unknown	Not a bumble bee	Ontario	Canada	2014-06-12	Male	6077	Invalid	2014-06-17	30	sp.	Website
	2476	bee	2251	impatiens	Common eastern bumble bee	Ontario	Canada	2014-06-12	Female	6077	Verified	2017-06-12	34	sp.	Website
	2477	bee	2252	Unknown	Not a bumble bee	Minnesota	United States	2014-05-28	Female	417	Invalid	2017-12-05	27	ternarius	Website
	2478	bee	2256	Unknown	Not a bumble bee	Montana	United States	2014-06-08	Male	10	Invalid	2014-09-22	8	sp.	Website
	2479	bee	2257	Unknown	Not a bumble bee	Ontario	Canada	2014-06-12	Male	3866	Invalid	2014-06-17	30	impatiens	Website
	2480	bee	2258	fervidus	Yellow bumble bee	Washington	United States	2014-06-12	Female	8069	Verified	2017-11-14	25	fervidus	Website
	2481	bee	2259	mixtus	Fuzzy-horned bumble bee	Washington	United States	2014-06-12	Female	5166	Verified	2017-10-12	25	mixtus	Website
	2482	bee	2260	mixtus	Fuzzy-horned bumble bee	Washington	United States	2014-06-12	Female	5166	Verified	2017-10-06	25	mixtus	Website
	2483	bee	2263	impatiens	Common eastern bumble bee	Ontario	Canada	2014-06-12	Female	3018	Verified	2017-03-30	25	impatiens	Website
	2484	bee	2264	Unknown	Not a bumble bee	Ontario	Canada	2014-06-12	Male	5708	Invalid	2014-06-17	30	impatiens	Website
	2486	bee	2266	nevadensis	Nevada bumble bee	Colorado	United States	2013-08-17	Female	3504	Verified	2017-12-05	27	nevadensis	Website
	2487	bee	2267	griseocollis	Brown-belted bumble bee	Colorado	United States	2013-08-03	Female	3504	Verified	2017-12-05	27	griseocollis	Website
	2488	bee	2268	vosnesenskii or caliginosus	Yellow-faced group	Washington	United States	2014-06-11	Female	3951	Verified	2017-10-27	25	caliginosus	Website
	2489	bee	2269	Unknown	Not a bumble bee	Washington	United States	2014-06-12	Male	2767	Invalid	2014-09-09	8	sp.	Website
	2490	bee	2270	vagans	Half-black bumble bee	Alberta	Canada	2014-05-28	Female	4485	Verified	2016-09-16	28	vagans	Website
	2491	bee	2271	Unknown	Not a bumble bee	Minnesota	United States	2014-05-26	Female	1795	Invalid	2017-12-05	27	bimaculatus	Website
	2494	bee	2274	impatiens	Common eastern bumble bee	Ohio	United States	2014-06-13	Female	1881	Verified	2017-12-05	27	sp.	Website
	2495	bee	2277	auricomus	Black and gold bumble bee	Iowa	United States	2014-06-13	Female	8452	Verified	2017-12-05	27	auricomus	Website
	2496	bee	2278	Unknown	Not a bumble bee	Texas	United States	2014-06-13	Male	1164	Invalid	2014-09-08	8	sp.	Website
	2497	bee	2279	Unknown	Not a bumble bee	Texas	United States	2014-06-13	Female	1164	Invalid	2017-12-05	27	sp.	Website
	2498	bee	2280	Unknown	Not a bumble bee	Texas	United States	2014-06-13	Female	1164	Invalid	2016-05-12	18	sp.	Website
	2499	bee	2281	Unknown	Not a bumble bee	Washington	United States	2014-05-08	Female	3144	Invalid	2015-05-18	27	sp.	Website
	2500	bee	2282	Unknown	Not a bumble bee	Washington	United States	2014-06-11	Not Determined	8090	Invalid	2017-09-14	25	vosnesenskii	Website
	2501	bee	2283	Unknown	Not a bumble bee	California	United States	2014-06-13	Male	895	Invalid	2014-08-13	27	sp.	Website
	2502	bee	2284	impatiens	Common eastern bumble bee	Ohio	United States	2014-06-13	Female	1881	Verified	2017-12-05	27	sp.	Website
	2506	bee	2288	Unknown	Not a bumble bee	Ontario	Canada	2014-06-11	Female	8129	Invalid	2017-03-30	25	impatiens	Website
	2507	bee	2289	Unknown	Not a bumble bee	Ontario	Canada	2014-06-13	Female	8129	Invalid	2017-06-12	34	rufocinctus	Website
	2508	bee	2290	Unknown	Not a bumble bee	Texas	United States	2014-06-13	Male	8051	Invalid	2014-09-08	8	sp.	Website
	2509	bee	2291	vosnesenskii or caliginosus	Yellow-faced group	California	United States	2014-06-11	Female	3153	Verified	2017-12-05	27	vandykei	Website
	2510	bee	2292	Unknown	Not a bumble bee	Minnesota	United States	2014-06-11	Female	2072	Invalid	2017-12-05	27	sp.	Website
	2511	bee	2293	sp.	Bumble bee	Delaware	United States	2014-06-13	Female	4286	Verified	2017-12-05	27	sp.	Website
	2512	bee	2294	bimaculatus	Two-spotted bumble bee	Tennessee	United States	2014-06-13	Female	5220	Verified	2014-06-15	24	bimaculatus	Website
	2513	bee	2295	impatiens	Common eastern bumble bee	Tennessee	United States	2014-06-13	Female	2157	Verified	2017-03-30	25	impatiens	Website
	2514	bee	2297	ternarius	Tri-colored bumble bee	Manitoba	Canada	2014-05-22	Female	7334	Verified	2017-07-19	14	ternarius	Website
	2515	bee	2298	Unknown	Not a bumble bee	Maryland	United States	2014-06-14	Male	5617	Invalid	2014-06-15	24	sp.	Website
	2516	bee	2299	pensylvanicus	American bumble bee	California	United States	2014-06-04	Female	657	Verified	2017-12-05	27	pensylvanicus	Website
	2517	bee	2300	griseocollis	Brown-belted bumble bee	Maryland	United States	2014-06-14	Female	5617	Verified	2014-06-15	24	griseocollis	Website
	2518	bee	2301	Unknown	Not a bumble bee	Maryland	United States	2014-06-14	Male	905	Invalid	2017-12-05	27	sp.	Website
	2519	bee	2302	vosnesenskii	Yellow-faced bumble bee	Washington	United States	2010-04-16	Female	6971	Verified	2017-10-27	25	caliginosus	Website
	2521	bee	2304	morrisoni	Morrison bumble bee	Colorado	United States	2004-08-04	Female	6971	Verified	2017-01-20	27	morrisoni	Website
	2522	bee	2305	Unknown	Not a bumble bee	Colorado	United States	2004-08-04	Female	6971	Invalid	2017-12-05	27	appositus	Website
	2523	bee	2306	griseocollis	Brown-belted bumble bee	Delaware	United States	2014-06-14	Not Determined	4286	Verified	2017-12-01	7	griseocollis	Website
	2525	bee	2311	Unknown	Not a bumble bee	California	United States	2014-06-14	Female	4703	Invalid	2017-12-05	27	sp.	Website
	2526	bee	2312	impatiens	Common eastern bumble bee	Arkansas	United States	2014-06-13	Female	709	Verified	2017-12-05	27	sp.	Website
	2527	bee	2313	sp.	Bumble bee	Arkansas	United States	2014-06-13	Female	709	Verified	2017-12-05	27	sp.	Website
	2528	bee	2314	bimaculatus	Two-spotted bumble bee	Tennessee	United States	2014-06-06	Female	7696	Verified	2017-12-05	27	sp.	Website
	2530	bee	2316	ternarius	Tri-colored bumble bee	Minnesota	United States	2014-06-12	Female	3759	Verified	2014-06-15	24	ternarius	Website
	2531	bee	2317	vosnesenskii or caliginosus	Yellow-faced group	Washington	United States	2014-06-14	Female	2770	Verified	2017-10-27	25	caliginosus	Website
	2532	bee	2320	Unknown	Not a bumble bee	California	United States	2014-06-10	Female	2812	Invalid	2017-12-05	27	sp.	Website
	2533	bee	2321	Unknown	Not a bumble bee	New Hampshire	United States	2014-06-09	Female	3670	Invalid	2017-12-05	27	variabilis	Website
	2534	bee	2322	Unknown	Not a bumble bee	Maryland	United States	2014-06-14	Male	109	Invalid	2014-06-15	24	sp.	Website
	2535	bee	2323	Unknown	Not a bumble bee	Missouri	United States	2014-06-14	Female	5753	Invalid	2017-12-05	27	variabilis	Website
	2536	bee	2324	Unknown	Not a bumble bee	Missouri	United States	2014-06-14	Female	5753	Invalid	2017-03-30	25	impatiens	Website
	2537	bee	2325	Unknown	Not a bumble bee	New Jersey	United States	2014-06-08	Male	4921	Invalid	2014-09-08	8	sp.	Website
	2538	bee	2326	bimaculatus	Two-spotted bumble bee	Maine	United States	2014-06-14	Female	1017	Verified	2017-06-23	25	bimaculatus	Website
	2539	bee	2329	bimaculatus	Two-spotted bumble bee	Delaware	United States	2014-06-15	Female	4286	Verified	2017-12-05	27	griseocollis	Website
	2540	bee	2330	impatiens	Common eastern bumble bee	Pennsylvania	United States	2014-06-15	Female	727	Verified	2017-12-05	27	variabilis	Website
	2541	bee	2331	Unknown	Not a bumble bee	Michigan	United States	2014-06-15	Male	5502	Invalid	2014-09-08	8	sp.	Website
	2542	bee	2332	impatiens	Common eastern bumble bee	Maryland	United States	2014-06-15	Female	5617	Verified	2017-06-23	25	bimaculatus	Website
	2543	bee	2333	griseocollis	Brown-belted bumble bee	Maryland	United States	2014-06-15	Female	5617	Verified	2017-12-05	27	griseocollis	Website
	2544	bee	2334	bimaculatus	Two-spotted bumble bee	Maryland	United States	2014-06-15	Male	5617	Verified	2017-12-05	27	impatiens	Website
	2545	bee	2335	bimaculatus	Two-spotted bumble bee	Maryland	United States	2014-06-15	Female	5617	Verified	2017-12-05	27	bimaculatus	Website
	2550	bee	2340	Unknown	Not a bumble bee	Indiana	United States	2014-05-13	Male	5923	Invalid	2014-06-16	30	sp.	Website
	2552	bee	2342	Unknown	Not a bumble bee	Indiana	United States	2014-06-13	Male	6308	Invalid	2014-06-16	30	impatiens	Website
	2559	bee	2349	Unknown	Not a bumble bee	Minnesota	United States	2014-06-12	Female	7017	Invalid	2017-12-05	27	auricomus	Website
	2560	bee	2350	Unknown	Not a bumble bee	Ontario	Canada	2014-06-14	Male	3866	Invalid	2014-06-16	30	impatiens	Website
	2561	bee	2351	Unknown	Not a bumble bee	Kentucky	United States	2014-06-01	Male	1171	Invalid	2014-06-16	27	sp.	Website
	2564	bee	2354	impatiens	Common eastern bumble bee	Ontario	Canada	2014-06-15	Worker	551	Verified	2018-03-26	34	impatiens	Website
	2567	bee	2357	griseocollis	Brown-belted bumble bee	Ohio	United States	2014-06-16	Female	1831	Verified	2017-12-05	27	impatiens	Website
	2568	bee	2358	griseocollis	Brown-belted bumble bee	Ohio	United States	2014-06-13	Female	1595	Verified	2017-12-05	27	griseocollis	Website
	2569	bee	2359	bimaculatus	Two-spotted bumble bee	Ohio	United States	2014-06-15	Female	1785	Verified	2017-12-05	27	impatiens	Website
	2570	bee	2360	Unknown	Not a bumble bee	Ohio	United States	2014-06-13	Male	5499	Invalid	2014-09-08	8	sp.	Website
	2571	bee	2361	sp.	Bumble bee	Ohio	United States	2014-06-16	Female	3283	Verified	2017-12-05	27	sp.	Website
	2572	bee	2363	sp.	Bumble bee	Ohio	United States	2014-06-13	Female	1446	Verified	2017-12-05	27	sp.	Website
	2573	bee	2366	Unknown	Not a bumble bee	Ohio	United States	2014-06-13	Male	5328	Invalid	2014-09-08	8	sp.	Website
	2574	bee	2367	Unknown	Not a bumble bee	Ohio	United States	2014-06-13	Male	1595	Invalid	2014-09-22	8	sp.	Website
	2575	bee	2369	impatiens	Common eastern bumble bee	Ohio	United States	2014-06-16	Female	5914	Verified	2017-12-05	27	variabilis	Website
	2576	bee	2371	nevadensis	Nevada bumble bee	Colorado	United States	2014-06-12	Female	1067	Verified	2017-12-05	27	nevadensis	Website
	2577	bee	2372	Unknown	Not a bumble bee	Ohio	United States	2014-06-13	Female	5316	Invalid	2017-12-05	27	sp.	Website
	2578	bee	2373	sp.	Bumble bee	Ohio	United States	2014-06-16	Female	1881	Verified	2017-12-05	27	sp.	Website
	2579	bee	2374	Unknown	Not a bumble bee	Ohio	United States	2014-06-13	Male	3465	Invalid	2014-06-16	30	sp.	Website
	2580	bee	2375	Unknown	Not a bumble bee	Oregon	United States	2014-06-14	Male	3486	Invalid	2014-07-04	27	sp.	Website
	2582	bee	2379	Unknown	Not a bumble bee	Ohio	United States	2014-06-16	Male	7937	Invalid	2014-09-22	8	sp.	Website
	2583	bee	2380	sp.	Bumble bee	Ohio	United States	2014-06-16	Female	7408	Verified	2017-12-05	27	sp.	Website
	2584	bee	2381	Unknown	Not a bumble bee	Ohio	United States	2014-06-13	Female	5316	Invalid	2017-12-05	27	sp.	Website
	2585	bee	2382	impatiens	Common eastern bumble bee	Ohio	United States	2014-06-13	Female	7257	Verified	2017-12-05	27	sp.	Website
	2586	bee	2383	sp.	Bumble bee	Ohio	United States	2014-06-13	Female	4824	Verified	2017-12-05	27	sp.	Website
	2587	bee	2384	sp.	Bumble bee	Ohio	United States	2014-06-13	Female	1595	Verified	2017-12-05	27	griseocollis	Website
	2588	bee	2385	impatiens	Common eastern bumble bee	Ohio	United States	2014-06-16	Female	4773	Verified	2016-09-14	14	auricomus	Website
	2589	bee	2386	sp.	Bumble bee	Ohio	United States	2014-06-16	Female	610	Verified	2017-12-05	27	sp.	Website
	2593	bee	2390	Unknown	Not a bumble bee	South Dakota	United States	2012-06-29	Male	4915	Invalid	2014-06-16	30	impatiens	Website
	2597	bee	2394	fervidus	Yellow bumble bee	Minnesota	United States	2013-06-18	Female	743	Verified	2017-05-06	7	fervidus	Website
	2600	bee	2397	griseocollis	Brown-belted bumble bee	Minnesota	United States	2014-06-16	Female	743	Verified	2017-02-21	7	griseocollis	Website
	2601	bee	2398	sp.	Bumble bee	Minnesota	United States	2014-06-16	Female	743	Verified	2017-12-05	27	griseocollis	Website
	2602	bee	2399	griseocollis	Brown-belted bumble bee	Colorado	United States	2014-06-16	Female	541	Verified	2017-12-05	27	impatiens	Website
	2604	bee	2401	sp.	Bumble bee	Minnesota	United States	2014-06-16	Female	743	Verified	2017-12-05	27	impatiens	Website
	2605	bee	2402	griseocollis	Brown-belted bumble bee	Minnesota	United States	2014-06-16	Female	743	Verified	2017-12-05	27	griseocollis	Website
	2606	bee	2403	sp.	Bumble bee	Minnesota	United States	2014-06-16	Female	743	Verified	2017-12-05	27	fervidus	Website
	2607	bee	2404	Unknown	Not a bumble bee	Alabama	United States	2014-06-15	Male	7620	Invalid	2014-06-16	30	bimaculatus	Website
	2609	bee	2406	sp.	Bumble bee	British Columbia	Canada	2014-06-07	Female	286	Verified	2017-12-05	27	griseocollis	Website
	2612	bee	2410	pensylvanicus	American bumble bee	Texas	United States	2014-06-16	Female	3477	Verified	2017-12-05	27	auricomus	Website
	2614	bee	2412	impatiens	Common eastern bumble bee	Colorado	United States	2014-06-16	Female	1840	Verified	2017-12-05	27	nevadensis	Website
	2615	bee	2413	Unknown	Not a bumble bee	Ontario	Canada	2014-06-16	Male	8453	Invalid	2014-06-17	30	sp.	Website
	2616	bee	2414	Unknown	Not a bumble bee	Kansas	United States	2014-06-12	Female	4637	Invalid	2017-12-05	27	pensylvanicus	Website
	2617	bee	2415	Unknown	Not a bumble bee	Michigan	United States	2014-06-15	Male	2878	Invalid	2014-06-17	30	sp.	Website
	2618	bee	2416	Unknown	Not a bumble bee	Ontario	Canada	2014-06-13	Female	6983	Invalid	2017-03-30	25	impatiens	Website
	2628	bee	2426	griseocollis	Brown-belted bumble bee	Washington	United States	2014-06-11	Female	3144	Verified	2014-06-17	27	flavifrons	Website
	2630	bee	2428	Unknown	Not a bumble bee	New Hampshire	United States	2014-06-17	Female	443	Invalid	2016-10-25	27	affinis	Website
	2632	bee	2430	Unknown	Not a bumble bee	Colorado	United States	2014-06-16	Male	6934	Invalid	2014-06-17	30	sp.	Website
	2633	bee	2433	Unknown	Not a bumble bee	Colorado	United States	2014-06-16	Male	6934	Invalid	2014-06-17	30	sp.	Website
	2634	bee	2434	Unknown	Not a bumble bee	Colorado	United States	2014-06-16	Male	6934	Invalid	2014-06-17	27	sp.	Website
	2639	bee	2440	vosnesenskii or caliginosus	Yellow-faced group	Washington	United States	2014-06-01	Female	3830	Verified	2017-12-05	27	sp.	Website
	2640	bee	2441	mixtus	Fuzzy-horned bumble bee	Washington	United States	2014-06-02	Female	3830	Verified	2017-12-05	27	sp.	Website
	2641	bee	2442	griseocollis	Brown-belted bumble bee	Maryland	United States	2014-06-17	Female	109	Verified	2017-12-05	27	sp.	Website
	2642	bee	2443	sp.	Bumble bee	Washington	United States	2014-06-16	Female	4433	Verified	2017-12-05	27	sp.	Website
	2643	bee	2444	impatiens	Common eastern bumble bee	New Brunswick	Canada	2014-06-17	Worker	7611	Verified	2017-09-27	34	impatiens	Website
	2644	bee	2445	impatiens	Common eastern bumble bee	New Brunswick	Canada	2014-06-17	Worker	7611	Verified	2017-09-27	34	vagans	Website
	2645	bee	2446	Unknown	Not a bumble bee	Wyoming	United States	2014-06-10	Male	2557	Invalid	2014-06-18	30	sp.	Website
	2646	bee	2447	flavifrons	Yellow head bumble bee	Washington	United States	2014-06-10	Male	4433	Verified	2017-12-05	27	sp.	Website
	2648	bee	2449	flavifrons	Yellow head bumble bee	Washington	United States	2014-06-10	Female	4433	Verified	2017-12-05	27	sp.	Website
	2649	bee	2453	melanopygus	Black-tailed bumble bee	Washington	United States	2014-06-10	Female	4433	Verified	2017-12-05	27	sp.	Website
	2658	bee	2464	impatiens	Common eastern bumble bee	Minnesota	United States	2014-06-16	Female	5922	Verified	2017-12-05	27	sp.	Website
	2659	bee	2468	griseocollis	Brown-belted bumble bee	Minnesota	United States	2014-06-16	Female	5922	Verified	2017-12-01	7	sp.	Website
	2660	bee	2469	bimaculatus	Two-spotted bumble bee	Delaware	United States	2014-06-17	Female	4286	Verified	2017-07-18	25	bimaculatus	Website
	2662	bee	2472	huntii	Hunt's bumble bee	Washington	United States	2014-06-17	Female	8503	Verified	2017-12-05	27	sp.	Website
	2663	bee	2474	auricomus	Black and gold bumble bee	Virginia	United States	2014-06-18	Female	7204	Verified	2017-12-05	27	auricomus	Website
	2664	bee	2475	centralis	Central bumble bee	Wyoming	United States	2014-06-18	Female	7574	Verified	2017-12-05	27	centralis	Website
	2666	bee	2477	mixtus	Fuzzy-horned bumble bee	Washington	United States	2014-06-17	Female	4443	Verified	2017-10-06	25	mixtus	Website
	2667	bee	2479	mixtus	Fuzzy-horned bumble bee	Washington	United States	2012-06-24	Female	4443	Verified	2017-12-05	27	sp.	Website
	2668	bee	2480	fervidus	Yellow bumble bee	Idaho	United States	2011-09-13	Female	4443	Verified	2017-08-09	27	sp.	Website
	2672	bee	2484	nevadensis	Nevada bumble bee	Colorado	United States	2014-06-18	Female	3466	Verified	2017-12-05	27	nevadensis	Website
	2673	bee	2485	Unknown	Not a bumble bee	California	United States	2014-06-18	Female	4155	Invalid	2017-12-05	27	sp.	Website
	2674	bee	2486	bimaculatus	Two-spotted bumble bee	Ontario	Canada	2014-06-18	Female	4856	Verified	2017-12-05	27	griseocollis	Website
	2676	bee	2488	Unknown	Not a bumble bee	Washington	United States	2014-06-18	Male	3304	Invalid	2014-07-23	27	sp.	Website
	2678	bee	2490	Unknown	Not a bumble bee	Georgia	United States	2014-06-18	Female	609	Invalid	2017-12-05	27	griseocollis	Website
	2679	bee	2491	impatiens	Common eastern bumble bee	Minnesota	United States	2014-06-18	Worker	4107	Verified	2017-03-12	7	impatiens	Website
	2682	bee	2494	Unknown	Not a bumble bee	Missouri	United States	2014-06-17	Female	7298	Invalid	2017-12-05	27	griseocollis	Website
	2683	bee	2495	sp.	Bumble bee	Rhode Island	United States	2014-05-09	Female	2602	Verified	2017-12-05	27	sp.	Website
	2685	bee	2497	sp.	Bumble bee	Washington	United States	2014-06-06	Female	3519	Verified	2017-10-27	25	caliginosus	Website
	2686	bee	2498	Unknown	Not a bumble bee	Maryland	United States	2014-06-09	Female	7666	Invalid	2017-12-05	27	sandersoni	Website
	2687	bee	2499	bimaculatus	Two-spotted bumble bee	Nebraska	United States	2014-06-18	Female	5126	Verified	2017-12-05	27	sp.	Website
	2688	bee	2500	mixtus	Fuzzy-horned bumble bee	British Columbia	Canada	2014-06-17	Female	182	Verified	2017-12-05	27	sp.	Website
	2689	bee	2501	sp.	Bumble bee	British Columbia	Canada	2014-06-17	Female	182	Verified	2017-12-05	27	sp.	Website
	2690	bee	2502	flavifrons	Yellow head bumble bee	British Columbia	Canada	2014-06-17	Female	182	Verified	2017-12-05	27	kirbiellus	Website
	2691	bee	2503	impatiens	Common eastern bumble bee	Ontario	Canada	2014-06-18	Female	8469	Verified	2017-12-05	27	sp.	Website
	2692	bee	2504	Unknown	Not a bumble bee	Minnesota	United States	2014-06-11	Male	2072	Invalid	2014-09-08	8	sp.	Website
	2693	bee	2505	bimaculatus	Two-spotted bumble bee	Minnesota	United States	2014-05-22	Female	2072	Verified	2017-06-23	25	bimaculatus	Website
	2694	bee	2506	sp.	Bumble bee	Minnesota	United States	2014-05-28	Female	2072	Verified	2017-12-05	27	griseocollis	Website
	2696	bee	2508	Unknown	Not a bumble bee	Virginia	United States	2014-06-19	Female	2441	Invalid	2017-12-05	27	sp.	Website
	2697	bee	2509	Unknown	Not a bumble bee	Washington	United States	2014-06-19	Male	4443	Invalid	2014-09-08	8	sp.	Website
	2698	bee	2510	Unknown	Not a bumble bee	Pennsylvania	United States	2014-05-22	Female	6226	Invalid	2017-12-05	27	griseocollis	Website
	2699	bee	2511	bimaculatus	Two-spotted bumble bee	Virginia	United States	2014-06-19	Female	239	Verified	2017-06-23	25	bimaculatus	Website
	2700	bee	2512	flavifrons	Yellow head bumble bee	Washington	United States	2014-06-19	Female	4443	Verified	2017-10-18	25	flavifrons	Website
	2701	bee	2513	mixtus	Fuzzy-horned bumble bee	Washington	United States	2014-06-19	Female	4443	Verified	2017-12-05	27	sp.	Website
	2703	bee	2515	impatiens	Common eastern bumble bee	Kentucky	United States	2014-06-19	Female	1739	Verified	2017-03-30	25	impatiens	Website
	2704	bee	2516	Unknown	Not a bumble bee	Arkansas	United States	2014-06-17	Female	709	Invalid	2017-12-05	27	sp.	Website
	2707	bee	2519	impatiens	Common eastern bumble bee	Ontario	Canada	2014-06-20	Female	3018	Verified	2017-03-30	25	impatiens	Website
	2709	bee	2521	bimaculatus	Two-spotted bumble bee	Virginia	United States	2014-06-20	Female	239	Verified	2017-06-23	25	bimaculatus	Website
	2711	bee	2524	flavifrons	Yellow head bumble bee	British Columbia	Canada	2014-06-20	Female	3402	Verified	2017-12-05	27	sp.	Website
	2713	bee	2526	impatiens	Common eastern bumble bee	Maryland	United States	2014-06-20	Female	109	Verified	2017-12-05	27	impatiens	Website
	2714	bee	2527	impatiens	Common eastern bumble bee	Pennsylvania	United States	2014-06-21	Female	6226	Verified	2017-12-05	27	griseocollis	Website
	2715	bee	2528	borealis	Northern amber bumble bee	New Brunswick	Canada	2014-06-19	Worker	3866	Verified	2017-09-27	34	fervidus	Website
	2717	bee	2530	nevadensis	Nevada bumble bee	Washington	United States	2014-06-21	Female	6272	Verified	2017-12-05	27	nevadensis	Website
	2720	bee	2533	huntii	Hunt's bumble bee	Colorado	United States	2014-06-21	Female	3466	Verified	2017-12-05	27	sylvicola	Website
	2722	bee	2535	fervidus	Yellow bumble bee	Colorado	United States	2014-06-21	Female	3466	Verified	2017-12-05	27	pensylvanicus	Website
	2724	bee	2537	fervidus	Yellow bumble bee	Colorado	United States	2014-06-21	Female	3466	Verified	2017-12-05	27	fervidus	Website
	2727	bee	2540	vosnesenskii	Yellow-faced bumble bee	Oregon	United States	2014-06-20	Female	602	Verified	2017-11-21	25	vosnesenskii	Website
	2733	bee	2547	nevadensis	Nevada bumble bee	Manitoba	Canada	2014-06-21	Female	7334	Verified	2017-12-07	28	nevadensis	Website
	2734	bee	2548	griseocollis	Brown-belted bumble bee	Manitoba	Canada	2014-06-21	Female	7334	Verified	2017-12-05	27	bimaculatus	Website
	2737	bee	2551	rufocinctus	Red-belted bumble bee	Utah	United States	2014-06-21	Female	3425	Verified	2017-12-05	27	rufocinctus	Website
	2738	bee	2552	sp.	Bumble bee	South Carolina	United States	2014-06-21	Female	6169	Verified	2017-12-05	27	sandersoni	Website
	2739	bee	2553	griseocollis	Brown-belted bumble bee	Ohio	United States	2014-06-21	Female	5376	Verified	2017-12-05	27	griseocollis	Website
	2742	bee	2556	griseocollis	Brown-belted bumble bee	Georgia	United States	2014-06-22	Female	2546	Verified	2017-12-05	27	griseocollis	Website
	2743	bee	2557	perplexus	Confusing bumble bee	Maryland	United States	2014-06-22	Female	5617	Verified	2017-12-05	27	sandersoni	Website
	2744	bee	2558	griseocollis	Brown-belted bumble bee	Georgia	United States	2014-06-22	Female	2546	Verified	2017-12-05	27	griseocollis	Website
	2745	bee	2559	perplexus	Confusing bumble bee	Maryland	United States	2014-06-22	Female	5617	Verified	2017-12-05	27	sandersoni	Website
	2747	bee	2562	impatiens	Common eastern bumble bee	Maryland	United States	2014-06-22	Female	5617	Verified	2017-12-05	27	variabilis	Website
	2748	bee	2563	Unknown	Not a bumble bee	Ontario	Canada	2014-06-19	Female	8453	Invalid	2017-03-30	25	impatiens	Website
	2749	bee	2564	Unknown	Not a bumble bee	Ontario	Canada	2014-06-19	Female	8453	Invalid	2016-03-01	34	sp.	Website
	2751	bee	2566	Unknown	Not a bumble bee	Ontario	Canada	2014-06-19	Female	8453	Invalid	2016-03-01	34	sp.	Website
	2753	bee	2568	Unknown	Not a bumble bee	Florida	United States	2014-06-22	Female	3664	Invalid	2017-12-05	27	griseocollis	Website
	2754	bee	2569	Unknown	Not a bumble bee	Oregon	United States	2014-06-22	Male	1966	Invalid	2014-07-04	27	sp.	Website
	2756	bee	2571	griseocollis	Brown-belted bumble bee	Virginia	United States	2014-06-22	Female	239	Verified	2017-12-07	27	griseocollis	Website
	2757	bee	2572	bimaculatus	Two-spotted bumble bee	Virginia	United States	2014-06-22	Female	239	Verified	2017-06-23	25	bimaculatus	Website
	2758	bee	2573	sp.	Bumble bee	Colorado	United States	2014-06-22	Female	3466	Verified	2017-12-07	27	vagans	Website
	2761	bee	2577	Unknown	Not a bumble bee	California	United States	2014-04-24	Male	137	Invalid	2014-09-22	8	sp.	Website
	2763	bee	2579	fervidus	Yellow bumble bee	Colorado	United States	2014-06-19	Female	3882	Verified	2017-12-07	27	sp.	Website
	2764	bee	2580	pensylvanicus	American bumble bee	Colorado	United States	2014-06-20	Female	3882	Verified	2017-12-07	27	sp.	Website
	2765	bee	2581	impatiens	Common eastern bumble bee	Pennsylvania	United States	2014-06-22	Female	3658	Verified	2017-12-07	27	griseocollis	Website
	2766	bee	2582	Unknown	Not a bumble bee	California	United States	2014-06-22	Male	8187	Invalid	2014-09-22	8	sp.	Website
	2770	bee	2586	bimaculatus	Two-spotted bumble bee	Ontario	Canada	2014-06-23	Female	3018	Verified	2017-07-18	25	bimaculatus	Website
	2771	bee	2587	fraternus	Southern plains bumble bee	Tennessee	United States	2014-06-21	Female	158	Verified	2017-12-07	27	fraternus	Website
	2773	bee	2589	griseocollis	Brown-belted bumble bee	Tennessee	United States	2014-06-23	Female	158	Verified	2017-12-07	27	griseocollis	Website
	2774	bee	2590	impatiens	Common eastern bumble bee	Tennessee	United States	2014-05-23	Female	158	Verified	2017-03-30	25	impatiens	Website
	2775	bee	2591	pensylvanicus	American bumble bee	Colorado	United States	2014-06-23	Female	3287	Verified	2017-12-07	27	auricomus	Website
	2776	bee	2592	nevadensis	Nevada bumble bee	Wyoming	United States	2014-06-23	Female	7574	Verified	2017-12-07	27	nevadensis	Website
	2777	bee	2593	vagans, sandersoni or perplexus	Two-yellow striped group	Minnesota	United States	2014-06-23	Female	1700	Verified	2017-12-07	27	rufocinctus	Website
	2778	bee	2594	borealis	Northern amber bumble bee	Alberta	Canada	2014-06-21	Female	1531	Verified	2017-12-07	27	borealis	Website
	2779	bee	2595	Unknown	Not a bumble bee	Kentucky	United States	2014-06-15	Female	5424	Invalid	2017-12-07	27	insularis	Website
	2780	bee	2597	sp.	Bumble bee	Kentucky	United States	2014-06-15	Female	5424	Verified	2014-07-03	27	affinis	Website
	2782	bee	2601	vagans, sandersoni or perplexus	Two-yellow striped group	New York	United States	2014-06-23	Female	3669	Verified	2017-12-07	27	sandersoni	Website
	2784	bee	2603	Unknown	Not a bumble bee	Florida	United States	2014-06-24	Female	3664	Invalid	2017-12-07	27	griseocollis	Website
	2789	bee	2608	auricomus	Black and gold bumble bee	Ohio	United States	2014-06-24	Female	6143	Verified	2016-09-14	14	auricomus	Website
	2790	bee	2609	griseocollis	Brown-belted bumble bee	Ohio	United States	2014-06-24	Female	6143	Verified	2017-12-07	27	griseocollis	Website
	2792	bee	2611	huntii	Hunt's bumble bee	Colorado	United States	2014-06-24	Female	6934	Verified	2017-12-07	27	sp.	Website
	2793	bee	2612	huntii	Hunt's bumble bee	Colorado	United States	2014-06-24	Female	6934	Verified	2017-12-07	27	sp.	Website
	2794	bee	2613	huntii	Hunt's bumble bee	Colorado	United States	2014-06-24	Female	6934	Verified	2017-12-07	27	sp.	Website
	2795	bee	2614	impatiens	Common eastern bumble bee	Pennsylvania	United States	2014-04-28	Female	2516	Verified	2017-03-30	25	impatiens	Website
	2796	bee	2615	Unknown	Not a bumble bee	Michigan	United States	2014-06-24	Male	2076	Invalid	2014-09-22	8	sp.	Website
	2798	bee	2618	pensylvanicus	American bumble bee	Texas	United States	2014-06-24	Female	3477	Verified	2016-05-12	18	auricomus	Website
	2799	bee	2619	sp.	Bumble bee	Texas	United States	2014-06-24	Female	3477	Verified	2017-12-07	27	auricomus	Website
	2800	bee	2620	Unknown	Not a bumble bee	Massachusetts	United States	2014-06-22	Male	2175	Invalid	2014-06-27	30	sp.	Website
	2801	bee	2622	Unknown	Not a bumble bee	Pennsylvania	United States	2014-06-24	Male	228	Invalid	2014-06-24	30	variabilis	Website
	2802	bee	2623	vosnesenskii	Yellow-faced bumble bee	Oregon	United States	2014-06-24	Female	7041	Verified	2017-12-07	27	caliginosus	Website
	2803	bee	2624	impatiens	Common eastern bumble bee	Massachusetts	United States	2014-06-22	Female	2175	Verified	2017-03-30	25	impatiens	Website
	2804	bee	2625	bimaculatus	Two-spotted bumble bee	Minnesota	United States	2014-06-23	Female	4107	Verified	2017-07-18	25	bimaculatus	Website
	2805	bee	2626	bimaculatus	Two-spotted bumble bee	Minnesota	United States	2014-06-23	Female	4107	Verified	2017-06-15	7	bimaculatus	Website
	2806	bee	2627	Unknown	Not a bumble bee	Virginia	United States	2014-06-25	Not Determined	5510	Invalid	2017-12-07	27	sp.	Website
	2807	bee	2628	nevadensis	Nevada bumble bee	Montana	United States	2014-06-24	Female	5596	Verified	2017-12-07	28	nevadensis	Website
	2811	bee	2632	griseocollis	Brown-belted bumble bee	Virginia	United States	2014-06-25	Female	239	Verified	2017-12-07	27	griseocollis	Website
	2812	bee	2633	bimaculatus	Two-spotted bumble bee	Virginia	United States	2014-06-25	Female	239	Verified	2017-07-18	25	bimaculatus	Website
	2815	bee	2636	flavifrons	Yellow head bumble bee	Oregon	United States	2014-06-17	Male	6113	Verified	2017-12-07	27	vandykei	Website
	2816	bee	2637	fervidus	Yellow bumble bee	Washington	United States	2014-06-25	Female	3320	Verified	2017-10-19	25	fervidus	Website
	2819	bee	2640	Unknown	Not a bumble bee	Minnesota	United States	2014-06-20	Female	4371	Invalid	2017-12-07	27	griseocollis	Website
	2820	bee	2641	griseocollis	Brown-belted bumble bee	South Carolina	United States	2014-06-25	Female	6169	Verified	2017-12-07	27	sandersoni	Website
	2821	bee	2642	impatiens	Common eastern bumble bee	Wisconsin	United States	2014-06-26	Female	5370	Verified	2017-12-01	7	griseocollis	Website
	2822	bee	2643	griseocollis	Brown-belted bumble bee	Colorado	United States	2014-06-26	Female	3466	Verified	2017-12-07	27	griseocollis	Website
	2823	bee	2644	bimaculatus	Two-spotted bumble bee	Minnesota	United States	2014-06-26	Female	4107	Verified	2017-12-01	7	bimaculatus	Website
	2825	bee	2646	Unknown	Not a bumble bee	Pennsylvania	United States	2014-06-26	Male	3658	Invalid	2014-07-01	30	griseocollis	Website
	2826	bee	2647	bimaculatus	Two-spotted bumble bee	New Jersey	United States	2014-06-26	Female	8349	Verified	2017-12-07	27	griseocollis	Website
	2830	bee	2651	sp.	Bumble bee	Georgia	United States	2014-06-27	Female	609	Verified	2017-12-07	27	auricomus	Website
	2833	bee	2654	ternarius	Tri-colored bumble bee	Alberta	Canada	2014-06-26	Female	1531	Verified	2017-12-07	27	rufocinctus	Website
	2836	bee	2658	Unknown	Not a bumble bee	Oregon	United States	2014-06-25	Male	187	Invalid	2014-07-03	27	sp.	Website
	2839	bee	2661	Unknown	Not a bumble bee	Virginia	United States	2014-06-27	Male	2601	Invalid	2014-06-27	30	griseocollis	Website
	2841	bee	2663	bimaculatus	Two-spotted bumble bee	Virginia	United States	2014-06-26	Female	239	Verified	2017-12-07	27	bimaculatus	Website
	2844	bee	2666	Unknown	Not a bumble bee	Ontario	Canada	2014-06-27	Female	1123	Invalid	2017-12-07	27	sp.	Website
	2845	bee	2667	sp.	Bumble bee	Saskatchewan	Canada	2014-06-27	Female	5539	Verified	2017-12-07	27	auricomus	Website
[truncated: 22,810 more rows]
