# Supplementary material for: Using Bumble Bee Watch to investigate the accuracy and perception of bumble bee (Bombus spp.) identification by community scientists
Source: PeerJ. 2020 Jun 29;8:e9412. doi: 10.7717/peerj.9412 (PMC7331626; doi:10.7717/peerj.9412)
Supplement: Supplemental Information 3 [file peerj-08-9412-s003.xlsx]

## Sheet: users,experts combined spp
respondent_id#_assignedbyVM	region	type_respondent (1_user, 2_expert)	East - affinis	combined - auricomus	East - bimaculatus	Combined-bohemicus	Combined - borealis	Combined - citrinus	Combined - fervidus	East - flavidus	Combined - fraternus	Combined - frigidus	Combined - griseocollis	Combined - impatiens	Combined - insularis	East - kirbiellus	Combined - morrisoni	Combined - nevadensis	Combined - pensylvanicus	Combined - perplexus	Combined - rufocinctus	Combined - sandersoni	Combined - ternarius	East - terricola	Combined - vagans	East - variabilis	West - appositus	West - bifarius	West - caliginosis	West - centralis	West - crotchii	West - cryptarum	West - flavifrons	West - franklini	West - jonellus	West - melanopygus	West - mixtus	West - occidentallis	West - suckleyi	West - sylvicola	West - vandykei	West - vosnesenski
1	1	1	2	2	2		3	3					1	1	3	4	3	3	3	2	4	4	4	4	3	3
2	1	1			4									2											5
3	1	1	5	5	5	5	5	5	5	5	5	5	5	5	5	5	5	5	5	5	5	5	3	5	5	5
4	1	1	4	4	4	4	4	4	4	4	4	4	4	4	4	4	4	4	4	4	4	4	4	4	4	4
5	1	1	5	1	1	5	2		1	5		5	5	5	5			5	2	5	5	5	5	5	5	5
6	1	1	5	5	2	5	5	5	5	5	5	5	5	1	5	5	5	5	5	5	3	5	2	5	5	5
7	2	1		2		4	3	4	3		4	5	4	3	4		4	4	3	5	4	4	4		4		3	4	4	4	4	4	1	4	3	3	4	4	5	3	5	5
8	1	1		5	2								1	2					4		5				5	5
9	2	1		2
10	2	1		2		3	3	4	4		4	4	4	2	4		2	3	3	4	4	3	2		3		2	3	3	2	4	2	4	3	3	3	4	3	3	3	3	3
11	1	1	1	2	1	1	2	1	2	5	5	5	1	1	5	5	5	5	2	1	3	5	1	1	2	5
12	1	1	2	2	2	2	4	4	2	4	4	4	4	4	4	3	3	3	2	5	5	4	5	3	2	4
13	1	1	1	5	1	5	5	5	4	5	5	5	1	1	5	5	5	5	4	3	5	5	3	3	1	5
14	2	1
15	2	1		4		4	4	4	4		4	4	4	4	4		4	4	4	4	4	4	4		4		4		4	4	4	4	4	4	4	4	4	4	4	4	4	4
16	1	1	2		1		3	3					2	2						2	2		2		3
17	1	1	5	5	5	5	5	5	5	5	5	5	5	5	5	5	5	5	5	5	5	5	5	5	5	5
18	2	1
19	2	1
20	1	1	1	5	5	5	5	5	5	5	5	5	5	5	5	5	5	5	5	5	5	5	1	1	5	5
21	2	1
22	2	1							2									2
23	1	1												2
24	1	1	3	2	1		3	3	3				2	1					1		2		1
25	1	1
26	1	1	3	4	5	5	4	5	3	5	5	4		4	5	5	5	5	4	4	5	4	5	5	5	5
27	1	1	3	5	4	5	5	5	5	5	5	5	3	3	5	5	5	5	5	5	5	5	5	5	5	5
28	2	1
29	2	1							5				4		5						5								4				5		4	5	5	5				5
30	1	1	4	3	4	5	5	5	4	5	5	5	5	3	5	5	5	5	3	5	5	5	5	5	5	5
31	2	1
32	2	1		4		4	4	4	4		4	4	4	4	4		4	4	4	4	3	5	3		3		3	4	4	3	4	4	4	4	3	4	4	4	4	3	4	4
33	2	1
34	1	1	2																		2
35	1	1	1										3	1			3					3		3
36	1	1
37	1	1	2	2	2		3	4	2	5			2	1	5				3	3	2	3	1	3	3
38	1	1			5		1	5	4					1						5	5	5	1	2	2
39	1	1	2	1	3	3	3	3	1	3	3	3	3	1	3	3	3	3	1		3	3		1	3	3
40	1	1	3											3							4		4
41	1	1
42	1	1			2	4		4					1	1					1						1	4
43	2	1															1											1		3								3		4
44	2	1																			3												3	3				3				3
45	2	1		4		4	4	4	3		4	4	4	4	4		3	4	4	4	4	4	4		4		4	4	4	4	4	4	4	4	4	4	4	4	4	4	4	4
46	1	1	3	3	3	3	3	3	3	3	3	3	3	3	3	3	3	3	3	3	3	3	3	3	3	3
47	2	1		4		4	4	4	4		4	4	4	4	4		4	4	4	4	4	4	4		4		4	4	4	4	4	4	4	4	4	4	4	4	4	4	4	4
48	1	1												2
49	1	1	5	5	5	5	5	5	5	5	5	5	5	1	5	5	5	5	5	5	5	5	5	5	5	5
50	1	1	5	5	5	5	5	5	5	5	5	5	5	5	5	5	5	5	5	5	5	5	5	5	5	5
51	1	1	3	1	4	4	4	4	3	4	4	4	4	2	4	4	4	4	4	4	4	4	4	4	4	4
52	1	1	2	5	2		4	4	4	5			2	1					3	5	4	5	1	2	5
53	2	1		2					4		4		1	1					3						4
54	1	1
55	1	1	3	3	3	4	4	3	3	3	4	4	4	3	3	3	3	3	3	3	4	4	4	4	3	3
56	1	1	3											3					3				1	1	3
57	2	1
58	1	1	5	5	5	3	3	4	1	5	5	5	1	1	4	5	5		1	5			4	4	5	5
59	1	1
60	1	1	1	3	1		1	2	1				1	1					3	5	2	4	1	1	3	3
61	2	1
62	2	1		4		4	4	4	4		4	4	4	4	4		4	4	4	4	4	4	4		4		4	4	4	4	4	4	4	4	4	4	4	4	4	4	4	4
63	1	1	1		5		1		1				4	1					2		5		5		5	5
64	1	1	5	5	5	5	5	5	5	5	5	5	5	5	5	5	5	5	5	5	5	5	5	5	5	5
65	2	1							3			2					2	2							4		2	3					3	2				2		3
66	2	1		3					3																								3
67	2	1		3		4	4	4	3				4	2	4					3	3				3
68	2	1							3			3	3		3						3		1					4		1			3			3
69	2	1
70	2	1
71	2	1		4		4	4	4	4		4	4	4	4	4		4	4	1	4	4	4	4		4		4	4	4	4	4	4	4	4	4	4	4	4	4	4	4	4
72	1	1	2	3	3				3			4	2	3					3	3	3	3	3	3	3
73	1	1	3	5	4	5	5	5	5	5	5	5	4	1	5	5	5	5	5	5	5	5	5	5	5	5
74	2	1
75	1	1	5	5	5	5	3	5	5	5	5	5	5	2	5	5	5	5	5	5	5	3	2	5	5	5
76	1	1	1	2	1	5	4	3	2	5			1	1	5				5	5	5	4	1	3	2
77	2	1
78	1	1												1
79	1	1	2									4	4	2					2		5		5
80	1	1	2	2					2	4	4	4	2	1
81	1	1	5	3	5	5	5	5	5	5	5	5	5	5	5	5	5	5	5	5	5	5	5	5	5	5
82	1	1	2	4	2	4	4	1	1	4	1	5	1	1	5	5	1	2	4	3	2	4	1	4	1	5
83	1	1	1	2	2	5	5	3	2	5	4	5	1	1	5	5	5	5	2	5	2	5		5	4	5
84	2	1		4		3	4	3	2		3	3	2	4	3		1	2	3		4	3	3		3		3	4	3	3	3	2	3	3	3	3	3	3	3	4	3	3
85	2	1		5		5	5	5	5		5	5	5	5	5		5	5	5	5	5	5	5		5		5	5	5	5	5	5	5	5	5	5	5	5	5	5	5	5
86	1	1	5	5	5	5	5	5	5	5	5	5	5	2	5	5	5	5	5	5	5	5	3	5	5	5
87	1	1	5	5	5	5	5	5	5	5	5	5	5	1	5	5	5	5	5	5	5	5	5	5	5	5
88	2	1		3		4	4	4	3		4	3	4	4	4												3	2	4	4	4	2	3	4							2
89	2	1
90	2	1		3		3	3	3	3		3	3	3	3	3		3	3	3	3	3	3	3		3		3	3	3	3	3	3	3	3	3	3	3	3	3	3	3	3
91	2	1
92	1	1	1	2	2	2	2		1		2	2	1	1	2	2	2	2	1	2	2	2	1	2	2	2
93	1	1			3									3
94	2	1		4		4	4	4	4		4	4	4	4	4		4	4	4	4	4	4	4		4		4	4	4	4	4	4	4	4	4	4	4	4	4	4	4	4
95	1	1	5	1	3									3
96	2	1
97	2	1		3		3	3	3	3		3	4	4	3	3		3	3	3	3	3	3	3		3		3	3	3	3	3	3	2	3	3	3	3	2	3	3	3	3
98	1	1
99	1	1	5	5	5	5	5	5	5	5	5	5	5	5	5	5	5	5	5	5	5	5	5	5	5	5
100	1	1
101	2	1		3		3	3	3	3		4	4	4	2	4		4	2	4	4	4	4	4		4		3	3	3	3	3	3	4	4	4	4	4	2	4	4	4	4
102	1	1	1	1	3		2		2				2	1						2			1	2
103	1	1	4		3		3	3	3			3	3	3					3			3
104	1	1	2											2							3				3
105	1	1
106	2	1
107	1	1	3	4	4	3	2	4	4	3	4		4	4					3	3		4	2	3	4	4
108	1	1	3	4	3	2	4	3	3	4	4	4	4	2	3	3	3	3	3	3	3	3	3	3	3	3
109	1	1												1
110	1	1
111	1	1	4	4	4	4	4	4	4	4	4	4	4	3	4	4	4	4	4	4	4	4	4	4	4	4
112	2	1
113	2	1		4		3	2	4	2			3			4		4		2	4		3	3		2		4	4	3	3	4	4	1		1	3	3	1	3	2	2	4
114	2	1
115	2	1
116	1	1			1				3				3	1			4			4	3				4
117	2	1							4				1	5	5			3			5						3						4			2	3				3	1
118	1	1	3	2	2				2				2	3					3
119	1	1	4	4	1	5	5	5	4	5			3	1	5				4	5	4	5	4	4	5	5
120	1	1	3		3									3						3
121	2	1
122	2	1
123	1	1		1	2		5		5			5	2	2					1			5			5
124	2	1		4		4	4	4	4		4	4	4	4	4		4	4	4	4	4	4	4		4		4	4	4	4	4	4	4	4	4	4	4	4	4	4	4	4
125	1	1	5	5	5	5	5	5	5	5	5	5	5	5	5	5	5	5	5	5	5	5	5	5	5	5
126	1	1	5	4	5	5	5	5	4	5	5	5	5	5	5	5	5	5	4	5	5	5	5	5	5	5
127	2	1
128	2	1							3			3								4		4	2		2			2		3			2			2	2	4	4
129	1	1												3					3
130	2	1							3				3		3			2										4	4	4			4	3		4	3	3			3	3
131	2	1
132	1	1	1	1
133	1	1	4	3	5		5		3					2					5				2
134	2	1		4		4	2	4	4		4	4	3	2	4		4	4	2	4	3	4	2		2		4	4	4	4	4	4	3	4	3	3	4	4	4	4	4	4
135	1	1
136	1	1	5	5	5	5	5	5	5	5	5	5	5	4	5	5	5	5	5	5	5	5	5	5	5	5
137	2	1
138	2	1				5	5		5			5	3		5			1		5	2		1		4			5		5			5			2	5	1	5
139	1	1	1	3	1		4		4		3		1	1					4		3	3	3	3	2
140	1	1
141	1	1
142	1	1			1								1	1					3				1
143	2	1		2			2	4	2			3	2		2		1	2	3	2	5	3	3		2		4	4	4	4	4	3	5	2		3	3	3	4	3	2
144	2	1		3		3	3	2	3		2	2	2	2	2		3		3		4	4	3		3		3	3	2	2	2	3	2	2	2	3	3	2	4	3	3	3
145	1	1	5	5	4	5	5	5	5	5	5	5	5	5	5	5	5	5	5	5	5	5	5	5	5	5
146	1	1	3	5	1		2	2	3		5	3	1	1					1	3	4	3	2	3	3
147	1	1		5	1				2				1	1					5
148	1	1
149	1	1	1	1	4								2												2
150	1	1	2	4	1	4	2	4	2				1	1	4				3	3	5	5	1	2	5	4
151	2	1		4		4	4	4	4		4	4	4	4	4		4	4	4	4	4	4	4		4		4	4	4	4	4	4	4	4	4	4	4	4	4	4	4	4
152	2	1		5		5	5	5	1		5	5	5	5	5		5	1	5	5	5	5	5		5		5	5	4	4	4	5	2	2	5	5	5	1	5	5	5	5
153	2	1		4		4	4	5	3		4	4	2	3	4		2	2	4	5	4	5			3		3	3	4	3	4	5	3	4	4	3	3	4	4	4	4	3
154	1	1	2	5	2		3	2	1	3		5	2	1	2				4	1	3	4	1	1	2	2
155	1	1	3	2	2	4	4	4	2	4	4	4	3	2	4	4	4	4	1	1	3	4	4	4	2	4
156	2	1																																								1
157	2	1
158	2	1
159	2	1
160	1	1	4		1								1	1					1
161	1	1
162	1	1			2		3						2	2						4	5	5	1	3
163	1	1	5	5	5	5	5	5	5	5	5	5	5	5	5	5	5	5	5	5	5	5	5	5		5
164	1	1	5	5	5	5	5	5	5	5	5	5	5	5	5	5	5	5	5	5	5	5	5	5	5	5
165	2	1		1				2	1				1	1					2	1			1		1
166	2	1
167	1	1	5	3	5	5	5	5	5	5	5	5	5	5	5	5	5	5	5	5	5	5	5	5	5	5
168	1	1	5	5	5	5	5	5	5	5	5	5	5	5	5	5	5	5	5	5	5	5	5	5	5	5
169	2	1																	1
170	1	1
171	2	1
172	1	1											3	3
173	1	1	4	4	4	4	4	4	4	4	1	4	4	1	4	4	4	4	1	4	4	4	4	4	4	4
174	1	1	4	4	4	4	4	4	4	4	4	4	4	4	4	4	4	4	4	4	4	4	3	3	4	4
175	2	1
176	1	1			4				4				5	3						4			2
177	2	1
178	2	1
179	1	1			5									3					3				3	3
180	1	1	4	4	4	4
181	1	1	3		2								2	2						3	2		2	3	2
182	1	1	2	3	2	3	2	3	3	3	3	3		2	3	3	3	3	3	3	3	3	3	3	3	3
183	2	1		2
184	1	1	3	3	2	5	4	4	5	5	5	5	2	2	4	5	5	5	4	4	3		2	3	4	5
185	1	1	4	4	4	3	4	4	4	4	4	4	4	4	4	4	4	4	4	4	4	4	4	4	4	4
186	2	1		3		3	2	2	2		3	2	2	2	2		3	3	4	3	2	3	2		3		3	3	2	2	3	2	3	4	4	3	4	2	4	2	2	2
187	2	1		5		5	5	5	5		5	5	5	5	5		5	5	5	5	5	5	5		5		5	5	5	5	5	5	5	5	5	5	5	5	5	5	5	5
188	1	1
189	1	1	5	5	5	5	5	5	5	5	5	5	5	5	5	5	5	5	5	5	5	5	5	5	5	5
190	2	1
191	2	1																									2									2		3				2
192	2	1																																								1
193	2	1							3				3								3							3	3				4			4	2	3			2	3
194	1	1
195	2	1		5		5	5	5	5		5	5	5	5	5		5	5	5	5	5	5	5		5		5	5	5	5	5	5	5	5	5	5	5	5	5	5	5	5
196	1	1												3
197	2	1					2						3					2			3		1		2														2
198	1	1
199	2	1											1	4				4	4								3
200	1	1												3
201	1	1	1	5	1	5	3	4	3				1	1					5	4	1	5	1	2	5
202	1	1	2	4	1		3	5	2				2	1	5				4		4		3	4	3
203	1	1	3	3	3	3	3	3	3	3	3	4	3	3	3	3	3	3	3	3	3	3	3	3	3	3
204	2	1		4		4	4	4	4		4	4	4	4	4		4	4	4	4	4	4	4		4		4	4	4	4	4	4	4	4	4	4	4	4	4	4	4	4
205	2	1		4		4	2	4	4		4	4	5	4	4		4	4	4	4	4	4	4		4		3	5	3		4	3	4	3	2	3	3	3	4	4	4	3
206	1	1						5	3	5	2			3					2		4		4	2	3
207	2	1													3						1		2						2				3				1	2	4			1
208	1	1	4	4	4	5	5	5	5	5	5	5	5	5	5	5	5	5	5	5	5	5	5	5	5	5
209	2	1		4					3		1		1	2					1
210	2	1
211	2	1							3			4	1	2	4		4	1			3		4		4		2	3	2	3			4			2	3	1	3	4	1	1
212	2	1
213	1	1	5	5	5	5	5	5	5	5	5	5	5	5	5	5	5	5	5	5	5	5	5	5	5	5
214	1	1	5	4	5								4	3					5	5				5	5
215	1	1	4	4	4	4	4	4	4	4	4	4	4	4	4	4	4	4	4	4	4	4	4	4	4	4
216	2	1																	1
217	2	1				5	3	4				3	1					1			4		4				4	3	5				4				4	2
218	1	1
219	1	1	4	4	4	4	4	4	4	4	4	4	4	4	4	4	4	4	4	4	4	4	4	4	4	4
220	1	1	2											1
221	2	1		2		4	3	4	4		4		2	3	4		5	5	3	4	1	3	1		1		3	4	5	4			3	4	5	4	4	4	2	2	3	2
222	1	1	5	5	5	5	5	5	3	5	5	5	4	4	5	5	5	5	5	5	5	5	5	5	5	5
223	2	1		3		3	3	3	3		3	3	3	3	3		3	3	3	3	3	3	3		3		3	3	3	3	3	3	3	3	3	3	3	3	3	3	3	3
224	1	1			2									2
225	1	1												2					3		3	3
226	2	1
227	1	1	5	2	5	5	5	5	5	5	5	5	5	5	5	5	5	5	5	5	5	5	3	5	5	5
228	1	1	4		1	5	2	5	2	5			4	1	5				2	5			1	2	2	5
229	2	1
230	1	1	5	5	5	5	5	5	5	5	5	5	5	5	5	5	5	5	5	5	5	5	5	5	5	5
231	2	1				5	5	3	1				3				1	3	1	5								5	3	3	1	3	1	2	2			1			3	1
232	2	1							1			1	1					1			1		1		1			1	1				1			1	1			1	1	1
233	2	1
234	2	1
235	2	1
236	1	1	2	2	2				2				2	1					3		2		1		3
237	2	1				3								3																3			3
238	1	1	5		3									3							3			3	3
239	2	1
240	1	1	5	5	5	5	5	5	5	5	5	5	5	2	5	5	5	5	5	5	5	5	5	5		5
241	2	1
242	1	1			1								1	1							1	2	1
243	2	1							3				4		5			1			4						1	1	5	2			3			1	1	1	5	4	3	1
244	1	1	2	1	1	3	3	3	1	3	3	3	2	1	3	2	2	3	2	2	2	2	2	2	2	3
245	1	1	2	3	3	3	3	3	3	3	3	3	3	3	3	3	3	3	3	3	3	3	2	3	3	3
246	2	1
247	1	1	3	3	3	3	3	3	2	3	3	3	2	1	3		4	4	2	4	3	3	3	3	3	3
248	1	1	4	4	4	4	4	4	4	4	4	4	4	4	4	4	4	4	4	4	4	4	4	4	4	4
249	1	1	5	5	5	5	5	5	5	5	5	5	5	5	5	5	5	5	5	5	5	5	5	5	5	5
250	1	1
251	1	1	5	5	5	5	5	5	5	5	5	5	5	5	5	5	5	5	5	5	5	5	5	5	5	5
252	2	1
253	2	1
254	1	1	1	2	4	4	4	4	4	4	4	4	4	4	4	4	4	4	4	4	4	4	4	4	4	4
255	1	1
256	1	1
257	1	1	5	5	4	5	5	5	5	5	5	5	5	4	5	5	5	5	5	5	5	5	5	5	5	5
258	2	1		1					1		1		2	3				3					3		2					1											3
259	1	1	2	4	4	4	4	4	4	4	4	4	4	4	4	4	4	4	4	4	4	4	4	4	4	4
260	1	1	4	4	4	4	4	4	4	4	4	4	4	2	4	4	4	4	4	4	4	4	4	4	4	4
261	1	1
262	1	1
263	1	1	4	3	4	5	5	4	4	3	4	5	4	4	4	5	4	4	5	5	4	4	5	4	5	4
264	1	1		2	5		3		3				5	2					3	5		5	1		5
265	1	1		5	3								1	1					5	5
266	2	1
267	1	1	3	3	3	3	3	3	3	3	3	3	3	3	3	3	3	3	3	3	3	3	3	3	3	3
268	1	1	2	2	1	5	2	5	2	5		5	1	1	5				3	5	1		2	2	2	5
269	2	1							3			3															3	3					3					2
270	2	1											2		4		2	1			4				2		2	1		2			3			3	3	2	3	3	4	2
271	1	1	4	4	3		4	4	2	4	4	4	4	2	4	4	4		3	4	3	4	4	2	4	4
272	2	1		3																							4
273	2	1
274	2	1		4		4	4	4	4		4	4	4	4	4		4	4	4	4	4	4	4		4		4	4	4	4	4	4	4	4	4	1	4	2	4	4	4	1
275	2	1		1		4	4	3	3		4	4	4	3	4		4	4	4	4	3	4	4		4		2	4	4	4	4	4	2	4	2	4	4	4	4	4	4	4
276	2	1
277	2	1
278	1	1	1	5	1	5	3	5	3	5	5	3	2	1	5				3	3	1		1	3	2	5
279	2	1		4		2	3	4	2		3	4	4	4	4		4	3	3	4	2	4	2		4		4	4	2	4	4	4	3	4	2	4	4	3	4	2	4	2
280	1	1	3	3	3	3	3	3	3	3	3	3	3	3	3	3	3	3	3	3	3	3	3	3	3	3
281	1	1
282	1	1	5	5	5	5	5	5	5	5	5	5	5	5	5	5	5	5	5	5	5	5	5	5	5	5
283	2	1		2		4	2	3	2		1		1	1			1	1	1			2	1		3		4	3	5	4		2	4	2		5	5	2			2	1
284	1	1	3	3	3	3	3	3	3	3	3	3	3	3	3	3	3	3	3	3	3	3	3	3	3	3
285	1	1	3			2			2		3		2	2	4	4			3		3			3
286	1	1	1	3	1			3	1				1	1						3					2
287	1	1	2	2	2	2	2	2	2	2	2	2	2	2	2	2	2	2	2	2	2	2	2	2	2	2
288	1	1	5	4	4	5	3	4	3	5	5	5	4	3	4	5	5	5	2	5	2	2	1	2	2	4
289	1	1	2	2	4	3	5	3	2	3	4	4	3	1	3	4	4	3	3	5	3	4	2	3	2	2
290	2	1		2		5	4	5	3		3	5	4	4	5		5	5	5	4	2	3	2		5		2		3	2	2	5	5	3				4	4	4
291	1	1	1	3	1	1	4	4	4	4	3	2	2	5	5	4	4		5	4	3	5	3	4	3	4
292	1	1
293	2	1
294	2	1
295	1	1	4	4	4	4	4	4	4	4	4	4	4	4	4	4	4	4	4	4	4	4	4	4	4	4
296	1	1	2										5	3							2	4	3	4
297	2	1							3				3		3			1			4						2	1	5	3			2	5		4	2	2	5		3	2
298	2	1							5				5																				5			5	5
299	1	1	2	3	1	2	5	5	3	5	5	5	2	1	5	5	5	5	2	5	2		1	5	5	5
300	2	1							4				2	2	4		2	2			4		4		2		2	2		4			4			3	4	1		4
301	1	1
302	1	1	4		1		3	4	1				1	1					1	4	2		1	1	4
303	1	1	5	2	5	5	5	5	5	5	5	5	5	2	5	5	5	5	5	5	5	5	5	5	5	5
304	1	1	5
305	2	1
306	1	1	5	5	4	5	5	5	5	5	5	5	5	5	5	5	5	5	5	5	4	5	4	4	4	5
307	2	1
308	1	1	3	4	1		2	4	2	4	4	4	4	1	4				4	1	4	4	1	1	1	4
309	2	1							5									5			3		5		5			5	4					5		1	5	3			4	1
310	1	1
311	1	1		5	1		5						1	1					5	4	3		1	3	5
312	2	1
313	2	1
314	1	1
315	1	1	4	4	4	4	4	4	4	4	4	4	4	4	4	4	4	4	4	4	4	4	4	4	4	4
316	1	1	2	4	1		1		2		1	3	1	1					3	5	5	3	1	1	1
317	2	1
318	2	1		5		5	5	5	5		5	5	5	5	5		5	5	5	5	5	5	5		5		5	5	5	5	5	5	5	5	5	5	5	5	5	5	5	5
319	1	1	5	3	1								2	1							1		1	1	2
320	1	1											4
321	1	1	1	1	1	5	4	5	2	5			1	1					3	3	2	4	1	2	1
322	1	1	1	1	1		1	3	1				1	1						4	3		3		1
323	2	1																															2			2						2
324	2	1		4		4	4	4	4		4	4	4	4	4		4	4	4	4	4	4	4		4		4	4	4	4	4	4	4	4	4	4	4	4	4	4	4	4
325	1	1	2	3	4	5	2	5	5	5	5	5	4	3	5	5	5	5	5	5	3	5	1	1	5	5
326	2	1
327	2	1
328	1	1												1									1
329	2	1		3		4	3	3	4		3	4	3	3	4		3	3	4		3		3				3	3	4	3	4	4	4	3	4	3	4	3	4	4	4	3
330	1	1	1	3	2			4	2				2	1					2		3			3	3
331	2	1							4				1				2	2	3	5	5	5	4				2	2		4			4		5	5		5	5	5
332	1	1	3	3	3	3	3	3	3	3	3	3	3	3	3	3	3	3	3	3	3	3	3	3	3	3
333	1	1
334	2	1		4		4	4	4	4		4	4	4	4	4		4	4	4	4	4	4	4		4		4	4	4	4	4	4	4	4	4	4	4	4	4	4	4	4
335	1	1	5	5	5	5	5	5	5	5	5	5	5	5	5	5	5	5	5	5	5	5	5	5	5	5
336	2	1		4		4	4	4	2		4										4				4		2	3	4	3	4	4	2	4
337	2	1							4			4	4							4	4		3		3				4	3		3
338	1	1
339	2	1												3				5		4			4										4						4			1
340	1	1	3	3	3	3	3	3	3	3	3	3	3	3	3	3	3	3	3	3	3	3	3	3	3	3
341	2	1																			4				1
342	2	1		2		4	4	4	2		4	4	3	5	5		4	3	1	4	2	3	3		2		2	4	4	2	4	3	2	3	4	3	3	2	4	3	4	5
901	1	2	1	5	1	5	1	1	1	5		1	1	1	5				5	1	1	5	1	1	3	5
902	1	2	1	3	1	5	1	3	1	5	1		1	1	5			3	3	1	5	5	1	1	3	5
903	1	2	1	3	1	1	1	3	1	5	1	5	1	1	5	5	3	3	3	5	5	5	1	1	5
904	1	2	3	5	3	3	3	3	1	3	1	5	1	1	3	5	3	3	3	3	5	5	1	1	5	1
905	1	2	3	3	1	3	1	5	3				1	1					3	1	1	5	1	1	1
906	2	2		3		4	3	3	4		3	3	3	3	4		3	3	4		4		3				4	3	4	3	4	4	4	3	4	3	4	3	4	3	4	3
907	2	2		4		4	1	4	1		1	3	1	3	4		1	1	5	5	4	5	3		5		1	3	5	4	1	1	4	3	1	1	1	1	4	3	3	3
908	2	2		3		4	1		1		1	4	1	1	3		1	1	1	4	3	5	1		4		1	1	4	1	1		1			1	1	1	3	3	3	1
909	2	2		1			4	1	4		1	4	1	1	1		1	1	1	3	3	3	1		1		1	1	4	3	1	3	3	1	3	3	4	3	3	3	1	1
910	2	2		3		4	4	4	1		3	3	1	1	4		1	1	1	4	4	4	1		3		1	1	4	1	3	1	1	1	1	1	1	1	4	3	1	1
911	2	2							1					1	1			1			5						1	3	5	1	1		1			3		1			4	1
912	2	2
913	1	2	1	3	1		1	1	1	5		3	1	1	5				3	1	3	5	1	1	1
914	1	2
915	1	2	1	3	1	1	1	3	1	1	1	3	1	1	1		1	5	5	1	1	5	1	1	5	3
